# Supplementary material
Source: PubMed Central journal article supplement (PMC3479679)
Supplement: NIHMS409433-supplement-Table_S1a.pdf [file NIHMS409433-supplement-Table_S1a.pdf]

**Supplemental Table S-1a. A list of 1,740 <sup>18</sup>O/<sup>16</sup>O labeled protein-specific peptides quantified by XPRESS, sorted by protein name.**

| <b>Acc No</b>                                                                                                  | <b>Peptide</b>              | <b>MH+</b> | <b>z</b> | <b>XC</b> | <b>ΔCN</b> | <b>H/L ratio</b> |
|----------------------------------------------------------------------------------------------------------------|-----------------------------|------------|----------|-----------|------------|------------------|
| <b><i>130 kD Golgi-localized phosphoprotein</i></b>                                                            |                             |            |          |           |            |                  |
| O00461                                                                                                         | R.EADPESEADR.A              | 1118.4596  | 2        | 2.3561    | 0.3911     | 0.26             |
| <b><i>24-dehydrocholesterol reductase precursor (EC 1.3.1.-) (3-beta-hydroxysterol delta-24-reductase)</i></b> |                             |            |          |           |            |                  |
| Q15392                                                                                                         | K.LGC*QDAFPEVYDK.I          | 1541.6941  | 2        | 4.1631    | 0.5189     | 0.36             |
| <b><i>26S proteasome non-ATPase regulatory subunit 1 (26S proteasome regulatory subunit RPN2) (26S)</i></b>    |                             |            |          |           |            |                  |
| Q99460                                                                                                         | R.QGALIASALIMIQQTEITCPK.V   | 2229.1981  | 2        | 3.0026    | 0.0846     | 0.01             |
| Q99460                                                                                                         | R.NNNTDLMILK.N              | 1175.6089  | 2        | 2.513     | 0.2882     | 0.80             |
| Q99460                                                                                                         | R.NNNTDLMILK].N             | 1179.6169  | 2        | 2.6547    | 0.1091     | 0.80             |
| Q99460                                                                                                         | R.QGALIASALIMIQQTEITC*PK.V  | 2286.2196  | 2        | 2.7925    | 0.1863     | 0.50             |
| Q99460                                                                                                         | R.QGALIASALIMIQQTEITC*PK].V | 2290.2276  | 2        | 3.0259    | 0.2066     | 0.30             |
| <b><i>40S ribosomal protein S11</i></b>                                                                        |                             |            |          |           |            |                  |
| P62280                                                                                                         | R.DVQIGDIVTVGEC*RPLSK.T     | 1986.0325  | 2        | 3.6268    | 0.3622     | 0.90             |
| <b><i>40S ribosomal protein S14</i></b>                                                                        |                             |            |          |           |            |                  |
| P62263                                                                                                         | R.IEDVTPIPSDSTR.R           | 1429.7169  | 2        | 3.2863    | 0.614      | 0.34             |
| <b><i>40S ribosomal protein S18 (Ke-3) (Ke3)</i></b>                                                           |                             |            |          |           |            |                  |
| P62269                                                                                                         | R.AGELTEDEVER.V             | 1247.575   | 1        | 1.9502    | 0.3589     | 0.38             |
| P62269                                                                                                         | R.AGELTEDEVER.V             | 1247.575   | 2        | 2.8509    | 0.4178     | 0.33             |
| P62269                                                                                                         | R.AGELTEDEVER.V             | 1247.575   | 2        | 3.5555    | 0.4745     | 0.33             |
| <b><i>40S ribosomal protein S3</i></b>                                                                         |                             |            |          |           |            |                  |
| P23396                                                                                                         | K.DEILPTTPISEQK.G           | 1470.7686  | 2        | 2.4952    | 0.3366     | 0.36             |
| <b><i>40S ribosomal protein S30</i></b>                                                                        |                             |            |          |           |            |                  |
| P62861                                                                                                         | R.FVNVVPTFGK.K              | 1107.6197  | 1        | 2.4055    | 0.3986     | 0.00             |
| <b><i>4F2 cell-surface antigen heavy chain (4F2hc) (Lymphocyte activation antigen 4F2 large subunit)</i></b>   |                             |            |          |           |            |                  |
| P08195                                                                                                         | K.GQSEDPGSLLSLFR.R          | 1505.7594  | 2        | 2.8546    | 0.5917     | 0.29             |
| P08195                                                                                                         | K.GQSEDPGSLLSLFR.R          | 1505.7594  | 2        | 4.1037    | 0.6528     | 0.41             |
| P08195                                                                                                         | K.ADLLLSTQPGR].E            | 1174.6557  | 1        | 3.1942    | 0.395      | 0.78             |
| P08195                                                                                                         | K.ADLLLSTQPGR.E             | 1170.6477  | 2        | 2.7006    | 0.3314     | 0.48             |
| P08195                                                                                                         | R.IGDLQAFQGHGAGNLAGLK.G     | 1866.9821  | 2        | 4.7309    | 0.629      | 0.52             |
| P08195                                                                                                         | R.EEGSPLELER].L             | 1162.5717  | 1        | 2.3073    | 0.2353     | 0.38             |
| P08195                                                                                                         | K.ADLLLSTQPGR.E             | 1170.6477  | 2        | 3.3911    | 0.4232     | 0.48             |

| Acc #  | Peptide                   | MH+       | z | XC     | DCN    | H/L ratio |
|--------|---------------------------|-----------|---|--------|--------|-----------|
| P08195 | R.LKLEPHEGLLLR.F          | 1417.8526 | 2 | 2.668  | 0.3659 | 0.75      |
| P08195 | K.EVELNELEPEK.Q           | 1328.658  | 2 | 3.6895 | 0.3369 | 0.26      |
| P08195 | K.EVELNELEPEK.Q           | 1328.658  | 1 | 3.3417 | 0.1638 | 0.13      |
| P08195 | K.EDFDSLLQSAK.K           | 1252.6056 | 2 | 3.308  | 0.5328 | 0.69      |
| P08195 | K.EDFDSLLQSAK.K           | 1252.6056 | 2 | 3.3159 | 0.5909 | 0.68      |
| P08195 | K.ADLLLSTQPGREEGSPLELER.L | 2310.1936 | 2 | 2.952  | 0.5077 | 0.78      |
| P08195 | K.VAEDEAEAAAAAK.F         | 1245.5957 | 2 | 4.4078 | 0.577  | 0.83      |
| P08195 | K.VAEDEAEAAAAAK.F         | 1245.5957 | 1 | 2.6753 | 0.5419 | 0.69      |
| P08195 | R.LDYLSLTK.V              | 938.5193  | 1 | 2.2495 | 0.3191 | 0.13      |
| P08195 | K.ADLLLSTQPGR.E           | 1170.6477 | 1 | 2.6252 | 0.533  | 0.78      |
| P08195 | R.LDYLSLTK.V              | 938.5193  | 2 | 2.8924 | 0.3098 | 0.23      |
| P08195 | R.VILDTPNYR.G             | 1203.6732 | 2 | 2.796  | 0.4189 | 0.28      |
| P08195 | R.IGDLQAFQGHGAGNLAGLK[G   | 1870.9901 | 2 | 4.2409 | 0.4886 | 0.49      |
| P08195 | R.WC*SWSLSQAR.L           | 1280.5841 | 2 | 3.1134 | 0.3153 | 0.47      |
| P08195 | K.GQSEDPGSLLSLFR[R        | 1509.7674 | 2 | 4.0502 | 0.3561 | 0.41      |
| P08195 | K.EVELNELEPEK.Q           | 1328.658  | 2 | 3.3901 | 0.2357 | 0.22      |
| P08195 | K.GLVLGPIHK.N             | 933.588   | 2 | 2.8694 | 0.4224 | 0.24      |
| P08195 | K.EDFDSLLQSAK.K           | 1252.6056 | 1 | 2.1534 | 0.4723 | 0.26      |
| P08195 | K.DLLLTSSYLSDSGSTGEHTK.S  | 2111.0139 | 3 | 3.3528 | 0.6266 | 0.63      |
| P08195 | K.EVELNELEPEK.Q           | 1328.658  | 2 | 2.8113 | 0.2608 | 1.23      |
| P08195 | K.GLVLGPIHK.N             | 933.588   | 1 | 2.0257 | 0.1698 | 0.34      |
| P08195 | K.SLVTQYLNATGNR.W         | 1436.7492 | 2 | 3.6913 | 0.5065 | 0.25      |
| P08195 | K.ADLLLSTQPGR.E           | 1170.6477 | 2 | 3.2401 | 0.4396 | 0.43      |
| P08195 | K.ADLLLSTQPGR.E           | 1170.6477 | 1 | 2.5305 | 0.4921 | 0.83      |
| P08195 | K.DLLLTSSYLSDSGSTGEHTK.S  | 2111.0139 | 2 | 5.4563 | 0.709  | 0.89      |
| P08195 | R.VILDTPNYR.G             | 1203.6732 | 2 | 3.5257 | 0.294  | 0.28      |
| P08195 | R.IGDLQAFQGHGAGNLAGLK.G   | 1866.9821 | 2 | 5.9329 | 0.5703 | 0.49      |
| P08195 | R.LKLEPHEGLLLR.F          | 1417.8526 | 2 | 2.4311 | 0.3084 | 0.83      |
| P08195 | K.EVELNELEPEK.Q           | 1328.658  | 1 | 2.7061 | 0.1861 | 0.08      |
| P08195 | K.DLLLTSSYLSDSGSTGEHTK[S  | 2115.0219 | 2 | 5.1395 | 0.6617 | 0.89      |
| P08195 | R.VILDTPNYR.G             | 1203.6732 | 2 | 2.7295 | 0.2105 | 0.28      |
| P08195 | K.EDFDSLLQSAK.K           | 1252.6056 | 2 | 3.378  | 0.5002 | 0.75      |
| P08195 | K.GQSEDPGSLLSLFR.R        | 1505.7594 | 2 | 3.9349 | 0.656  | 0.52      |
| P08195 | R.GENSWFSTQVDTVATK.V      | 1769.8341 | 2 | 4.0791 | 0.5536 | 0.07      |
| P08195 | K.GQSEDPGSLLSLFR[R        | 1509.7674 | 1 | 2.0698 | 0.2552 | 0.58      |
| P08195 | K.ADLLLSTQPGR[E           | 1174.6557 | 1 | 3.0848 | 0.3806 | 0.83      |

| Acc #  | Peptide                   | MH+       | z | XC     | DCN    | H/L ratio |
|--------|---------------------------|-----------|---|--------|--------|-----------|
| P08195 | K.VAEDEAEAAAAAK[F         | 1249.6037 | 1 | 2.7561 | 0.5152 | 0.69      |
| P08195 | K.ADLLLSTQPGR.E           | 1170.6477 | 2 | 3.3268 | 0.396  | 0.43      |
| P08195 | K.ADLLLSTQPGREEGSPLELER.L | 2310.1936 | 2 | 3.2541 | 0.5601 | 1.08      |
| P08195 | K.ADLLLSTQPGR.E           | 1170.6477 | 2 | 2.37   | 0.3197 | 0.40      |
| P08195 | K.EDFDSLLQSAK[K           | 1256.6136 | 1 | 2.0918 | 0.3818 | 0.26      |
| P08195 | K.EDFDSLLQSAK.K           | 1252.6056 | 2 | 3.5058 | 0.582  | 0.81      |
| P08195 | K.EDFDSLLQSAK.K           | 1252.6056 | 1 | 2.145  | 0.4649 | 0.30      |
| P08195 | K.GQSEDPGSLLSLFR[R        | 1509.7674 | 2 | 3.4597 | 0.2675 | 0.45      |
| P08195 | R.VILD LTPNYR.G           | 1203.6732 | 2 | 3.0235 | 0.3155 | 0.18      |
| P08195 | R.LDY LSSLK.V             | 938.5193  | 2 | 2.8685 | 0.3376 | 0.17      |
| P08195 | K.DLLLTSSYLSDSGSTGEHTK.S  | 2111.0139 | 2 | 5.6482 | 0.7271 | 0.84      |
| P08195 | K.DLLLTSSYLSDSGSTGEHTK.S  | 2111.0139 | 2 | 2.8311 | 0.5666 | 3.17      |
| P08195 | K.GLV L GPIHK.N           | 933.588   | 2 | 2.845  | 0.416  | 0.17      |
| P08195 | K.DLLLTSSYLSDSGSTGEHTK[S  | 2115.0219 | 2 | 5.0015 | 0.6361 | 0.84      |
| P08195 | R.VILD LTPNYR.G           | 1203.6732 | 2 | 3.0053 | 0.3354 | 0.18      |
| P08195 | K.VAEDEAEAAAAAK.F         | 1245.5957 | 2 | 4.5407 | 0.5817 | 1.01      |
| P08195 | K.ADLLLSTQPGR.E           | 1170.6477 | 2 | 2.7229 | 0.2916 | 0.43      |
| P08195 | R.LDY LSSLK.V             | 938.5193  | 2 | 2.6665 | 0.3018 | 0.27      |
| P08195 | K.VAEDEAEAAAAAK.F         | 1245.5957 | 1 | 2.6659 | 0.566  | 0.69      |
| P08195 | K.VAEDEAEAAAAAK[F         | 1249.6037 | 1 | 2.8825 | 0.5394 | 0.69      |
| P08195 | R.GENSWFSTQVDTVATK.V      | 1769.8341 | 2 | 4.9976 | 0.6532 | 0.21      |
| P08195 | R.VILD LTPNYR.G           | 1203.6732 | 2 | 3.161  | 0.215  | 0.34      |
| P08195 | R.LDY LSSLK.V             | 938.5193  | 1 | 2.1654 | 0.3005 | 0.13      |
| P08195 | R.VILD LTPNYR.G           | 1203.6732 | 2 | 2.8242 | 0.3943 | 0.34      |
| P08195 | R.LLTSFLPAQLLR[L          | 1375.8438 | 2 | 3.2762 | 0.2761 | 0.27      |
| P08195 | K.EDFDSLLQSAK.K           | 1252.6056 | 1 | 2.2368 | 0.4046 | 0.26      |
| P08195 | K.ADLLLSTQPGR.E           | 1170.6477 | 2 | 3.1322 | 0.4443 | 0.40      |
| P08195 | R.LLTSFLPAQLLR.L          | 1371.8358 | 2 | 3.1704 | 0.4813 | 0.27      |
| P08195 | R.IGDLQAFQGHGAGNLAGLK[G   | 1870.9901 | 2 | 4.3607 | 0.4626 | 0.50      |
| P08195 | K.GLV L GPIHK.N           | 933.588   | 1 | 2.0628 | 0.3752 | 0.33      |
| P08195 | K.DLLLTSSYLSDSGSTGEHTK.S  | 2111.0139 | 2 | 5.3118 | 0.6972 | 0.89      |
| P08195 | R.VILD LTPNYR[G           | 1207.6812 | 1 | 2.443  | 0.1769 | 0.38      |
| P08195 | K.DDVAQTDLLQIDPNFGSK.E    | 1975.9607 | 2 | 5.6426 | 0.5517 | 0.34      |
| P08195 | K.DDVAQTDLLQIDPNFGSK[E    | 1979.9687 | 2 | 4.5744 | 0.4716 | 0.34      |
| P08195 | R.LLTSFLPAQLLR[L          | 1375.8438 | 2 | 2.5959 | 0.0977 | 0.27      |
| P08195 | K.ADLLLSTQPGR.E           | 1170.6477 | 2 | 3.1946 | 0.3845 | 0.40      |

| Acc #                                                                                                   | Peptide                     | MH+       | z | XC     | DCN    | H/L ratio |
|---------------------------------------------------------------------------------------------------------|-----------------------------|-----------|---|--------|--------|-----------|
| P08195                                                                                                  | K.ADLLLSTQPGR[E             | 1174.6557 | 1 | 2.7442 | 0.2839 | 0.71      |
| P08195                                                                                                  | K.ADLLLSTQPGR.E             | 1170.6477 | 1 | 2.8109 | 0.5393 | 0.71      |
| P08195                                                                                                  | R.IGDLQAFQGHGAGNLAGLK.G     | 1866.9821 | 2 | 5.4564 | 0.5266 | 0.50      |
| P08195                                                                                                  | R.LLTSFLPAQLLR.L            | 1371.8358 | 1 | 2.3019 | 0.437  | 0.20      |
| P08195                                                                                                  | K.GQSEDPGSLLSLFR.R          | 1505.7594 | 2 | 4.2693 | 0.6399 | 0.35      |
| P08195                                                                                                  | R.LLTSFLPAQLLR[L.L          | 1375.8438 | 2 | 3.7368 | 0.5291 | 0.27      |
| P08195                                                                                                  | K.GQSEDPGSLLSLFR[R.R        | 1509.7674 | 2 | 3.6804 | 0.2446 | 0.35      |
| P08195                                                                                                  | R.LLTSFLPAQLLR.L            | 1371.8358 | 2 | 3.1603 | 0.4851 | 0.27      |
| P08195                                                                                                  | K.GLVLGPIHK[N.N             | 937.596   | 2 | 2.7477 | 0.2049 | 0.17      |
| P08195                                                                                                  | K.GLVLGPIHK.N               | 933.588   | 1 | 2.4828 | 0.372  | 0.33      |
| P08195                                                                                                  | R.LDYLSLKV.V                | 938.5193  | 1 | 2.1775 | 0.3099 | 0.20      |
| P08195                                                                                                  | R.IGDLQAFQGHGAGNLAGLK.G     | 1866.9821 | 3 | 4.0563 | 0.5262 | 0.45      |
| <b>60S ribosomal protein L18</b>                                                                        |                             |           |   |        |        |           |
| Q07020                                                                                                  | K.ILTFDQLALDSPK.G           | 1460.7995 | 2 | 3.6579 | 0.5517 | 1.22      |
| Q07020                                                                                                  | K.ILTFDQLALDSPK.G           | 1460.7995 | 2 | 2.6792 | 0.3522 | 0.63      |
| <b>60S ribosomal protein L18a</b>                                                                       |                             |           |   |        |        |           |
| Q02543                                                                                                  | R.DLTTAGAVTQC*YR.D          | 1455.6897 | 2 | 3.1017 | 0.4888 | 0.28      |
| <b>60S ribosomal protein L23 (Ribosomal protein L17)</b>                                                |                             |           |   |        |        |           |
| P62829                                                                                                  | R.ISLGLPVGAVINC*ADNTGAK[N.N | 1974.0455 | 2 | 4.0143 | 0.4309 | 0.94      |
| P62829                                                                                                  | R.LPAAGVGDMMVATVK.K         | 1459.7647 | 2 | 3.2952 | 0.6551 | 0.17      |
| P62829                                                                                                  | R.ISLGLPVGAVINC*ADNTGAK.N   | 1970.0375 | 2 | 4.9863 | 0.6208 | 0.94      |
| <b>60S ribosomal protein L31</b>                                                                        |                             |           |   |        |        |           |
| P62899                                                                                                  | K.LYTLVTVYVPVTTFK.N         | 1644.9247 | 2 | 2.336  | 0.3148 | 0.37      |
| <b>60S ribosomal protein L36a (60S ribosomal protein L44) (Migration-inducing gene 6 protein)</b>       |                             |           |   |        |        |           |
| P83881                                                                                                  | K.DSLYAQGK.R                | 881.4363  | 1 | 2.2964 | 0.3274 | 1.11      |
| <b>60S ribosomal protein L4 (L1)</b>                                                                    |                             |           |   |        |        |           |
| P36578                                                                                                  | K.NVTLPVAVFK.A              | 988.5826  | 1 | 2.1547 | 0.5096 | 3.01      |
| P36578                                                                                                  | R.IEEVPELPLVVEDK.V          | 1608.8731 | 2 | 3.0017 | 0.429  | 0.26      |
| P36578                                                                                                  | R.NIPGITLLNVSK.L            | 1268.7573 | 2 | 2.7097 | 0.5518 | 0.35      |
| <b>78 kDa glucose-regulated protein precursor (GRP 78) (Immunoglobulin heavy chain binding protein)</b> |                             |           |   |        |        |           |
| P11021                                                                                                  | K.SQIFSTASDNQPTVTIK.V       | 1836.9338 | 2 | 4.6573 | 0.5038 | 0.37      |
| P11021                                                                                                  | K.LYGSAGPPPTGEEDTAEK.D      | 1818.8392 | 2 | 3.196  | 0.4042 | 2.41      |
| P11021                                                                                                  | K.VLESDLK.K                 | 918.4779  | 1 | 2.0204 | 0.2116 | 0.32      |
| P11021                                                                                                  | K.SQIFSTASDNQPTVTIK.V       | 1836.9338 | 2 | 3.5309 | 0.458  | 0.36      |
| P11021                                                                                                  | K.NQLTSNPENTVFDK.R          | 1677.8079 | 2 | 4.8444 | 0.672  | 2.85      |

| Acc #                                                                                                                                | Peptide                    | MH+       | z | XC     | DCN    | H/L ratio |
|--------------------------------------------------------------------------------------------------------------------------------------|----------------------------|-----------|---|--------|--------|-----------|
| <b><i>7-dehydrocholesterol reductase (EC 1.3.1.21) (7-DHC reductase) (Sterol delta-7-reductase) (Putative</i></b>                    |                            |           |   |        |        |           |
| Q9UBM7                                                                                                                               | K.VIEC*SYTSADGQR.H         | 1485.6638 | 2 | 3.3168 | 0.5371 | 0.29      |
| Q9UBM7                                                                                                                               | K.FLPGYVGGIQEGAVTPAGVVNK.Y | 2173.1652 | 2 | 6.2106 | 0.7391 | 1.98      |
| Q9UBM7                                                                                                                               | K.FLPGYVGGIQEGAVTPAGVVNK[Y | 2177.1732 | 2 | 4.9744 | 0.5372 | 0.68      |
| Q9UBM7                                                                                                                               | K.FLPGYVGGIQEGAVTPAGVVNK[Y | 2177.1732 | 2 | 4.9687 | 0.5679 | 1.98      |
| Q9UBM7                                                                                                                               | K.VIEC*SYTSADGQR[H         | 1489.6718 | 2 | 2.9336 | 0.3505 | 0.29      |
| Q9UBM7                                                                                                                               | K.FLPGYVGGIQEGAVTPAGVVNK.Y | 2173.1652 | 2 | 6.1304 | 0.7303 | 0.68      |
| <b><i>Acetyl-coenzyme A transporter 1 (AT-1) (Acetyl-CoA transporter) (Solute carrier family 33 member 1)</i></b>                    |                            |           |   |        |        |           |
| O00400                                                                                                                               | R.EALLGDTGTGDFLK.A         | 1436.7268 | 2 | 3.6994 | 0.6013 | 0.27      |
| O00400                                                                                                                               | K.EETQGITDTYK.L            | 1284.5954 | 2 | 2.23   | 0.483  | 0.10      |
| <b><i>ADAM metalloproteinase with thrombospondin type 1 motif, 7, preproprotein</i></b>                                              |                            |           |   |        |        |           |
| Q6P7J9                                                                                                                               | R.SC*GGGSSVRDVQC*VDTRDLR[P | 2228.0273 | 2 | 2.6319 | 0.1887 | 1.87      |
| <b><i>Adenosine 3'-phospho 5'-phosphosulfate transporter 1 (PAPS transporter 1) (Solute carrier family 35</i></b>                    |                            |           |   |        |        |           |
| Q8TB61                                                                                                                               | K.ASDEVPLAPR.T             | 1054.5527 | 2 | 2.5056 | 0.3631 | 0.84      |
| Q8TB61                                                                                                                               | K.ASDEVPLAPR.T             | 1054.5527 | 1 | 2.3418 | 0.4769 | 1.41      |
| Q8TB61                                                                                                                               | K.FVSFPTQVLAK.A            | 1236.6987 | 2 | 2.6723 | 0.5354 | 0.48      |
| <b><i>ADP/ATP translocase 1 (Adenine nucleotide translocator 1) (ANT 1) (ADP,ATP carrier protein 1)</i></b>                          |                            |           |   |        |        |           |
| P12235                                                                                                                               | K.DFLAGGVAAAVSK.T          | 1205.6525 | 2 | 4.0261 | 0.5817 | 0.24      |
| <b><i>ADP/ATP translocase 2 (Adenine nucleotide translocator 2) (ANT 2) (ADP,ATP carrier protein 2)</i></b>                          |                            |           |   |        |        |           |
| P05141                                                                                                                               | R.AAYFGIYDTAK.G            | 1219.5994 | 2 | 2.9743 | 0.413  | 0.25      |
| P05141                                                                                                                               | R.AAYFGIYDTAK.G            | 1219.5994 | 2 | 3.2597 | 0.5131 | 0.15      |
| P05141                                                                                                                               | K.DFLAGGVAAAISK.T          | 1219.6681 | 2 | 4.7771 | 0.4931 | 0.28      |
| P05141                                                                                                                               | K.DFLAGGVAAAISK.T          | 1219.6681 | 2 | 4.2866 | 0.5367 | 0.25      |
| P05141                                                                                                                               | K.DFLAGGVAAAISK.T          | 1219.6681 | 2 | 4.4021 | 0.5945 | 0.28      |
| P05141                                                                                                                               | R.AAYFGIYDTAK.G            | 1219.5994 | 2 | 2.5474 | 0.4942 | 0.27      |
| P05141                                                                                                                               | K.DFLAGGVAAAISK.T          | 1219.6681 | 2 | 4.6233 | 0.4712 | 0.25      |
| P05141                                                                                                                               | K.DFLAGGVAAAISK.T          | 1219.6681 | 1 | 2.6867 | 0.5442 | 0.58      |
| P05141                                                                                                                               | K.GTDMYTGTLDC*WR.K         | 1688.7407 | 2 | 2.6801 | 0.4136 | 0.16      |
| P05141                                                                                                                               | K.DFLAGGVAAAISK.T          | 1219.6681 | 2 | 3.8827 | 0.4361 | 0.25      |
| <b><i>Alkyldihydroxyacetonephosphate synthase, peroxisomal precursor (EC 2.5.1.26) (Alkyl-DHAP</i></b>                               |                            |           |   |        |        |           |
| O00116                                                                                                                               | R.GISDPLTVFEQTEAAAR.E      | 1804.9076 | 2 | 5.0421 | 0.6511 | 1.08      |
| <b><i>Alpha-(1,3)-fucosyltransferase (EC 2.4.1.65) (Galactoside 3-L-fucosyltransferase)</i></b><br><b><i>(Fucosyltransferase</i></b> |                            |           |   |        |        |           |
| Q11128                                                                                                                               | R.PGLMAVEPVTGAPNGSR.C      | 1652.8425 | 2 | 2.3874 | 0.1033 | 1.59      |
| <b><i>Alpha-1,2-mannosyltransferase ALG9 (EC 2.4.1.-) (Asparagine-linked glycosylation protein 9</i></b>                             |                            |           |   |        |        |           |

| Acc #                                                                                                         | Peptide                   | MH+       | z | XC     | DCN    | H/L ratio |
|---------------------------------------------------------------------------------------------------------------|---------------------------|-----------|---|--------|--------|-----------|
| Q9H6U8                                                                                                        | R.IVPTDMNDQNLEEPSR.Y      | 1857.8647 | 2 | 3.5877 | 0.4193 | 0.36      |
| <b><i>Alpha-actinin 2 (Alpha actinin skeletal muscle isoform 2) (F-actin cross linking protein)</i></b>       |                           |           |   |        |        |           |
| P35609                                                                                                        | R.RELPPDQAQYCIK[R         | 1564.7919 | 2 | 2.7597 | 0.1242 | 11.07     |
| <b><i>Alpha-fetoprotein enhancer binding protein (AT motif-binding factor) (AT-binding transcription)</i></b> |                           |           |   |        |        |           |
| Q15911                                                                                                        | R.PHEEPGAAAGSSSK[K        | 1328.6208 | 2 | 2.3634 | 0.2826 | 1.42      |
| <b><i>Amphoterin-induced protein 1 precursor (Alivin-2)</i></b>                                               |                           |           |   |        |        |           |
| Q86WK6                                                                                                        | K.QQGMTKVVVTPSNER.V       | 1760.8748 | 2 | 2.2178 | 0.1162 | 0.42      |
| <b><i>Ankyrin repeat, SAM and basic leucine zipper domain-containing protein 1 (Germ cell-specific)</i></b>   |                           |           |   |        |        |           |
| Q8WWH4                                                                                                        | R.QGHKNIVLKLLELGANK[M     | 1879.1254 | 2 | 2.2218 | 0.1496 | 0.05      |
| <b><i>Annexin A1 (Annexin I) (Lipocortin I) (Calpactin II) (Chromobindin-9) (p35) (Phospholipase A2)</i></b>  |                           |           |   |        |        |           |
| P04083                                                                                                        | R.SEDFGVNEDLADSDAR[A      | 1743.7435 | 2 | 2.6003 | 0.3123 | 2.53      |
| <b><i>Apoptotic chromatin condensation inducer in the nucleus (Acinus)</i></b>                                |                           |           |   |        |        |           |
| Q9UKV3                                                                                                        | R.TSTSSSSVQARRLSQPESAEK[H | 2240.1244 | 2 | 2.9231 | 0.2222 | 3.23      |
| Q9UKV3                                                                                                        | K.LSEGSQPAEEEEEDQETPSR.N  | 2117.9105 | 2 | 4.0193 | 0.5932 | 1.59      |
| <b><i>Apoptotic protease-activating factor 1 (Apaf-1)</i></b>                                                 |                           |           |   |        |        |           |
| O14727                                                                                                        | K.CIFLRGHQETVK[D          | 1434.7653 | 2 | 2.3164 | 0.1678 | 0.14      |
| <b><i>ARP5 actin-related protein 5 homolog</i></b>                                                            |                           |           |   |        |        |           |
| Q8IU5                                                                                                         | K.LSIAVEQAKQK.I           | 1214.7103 | 1 | 1.9497 | 0.0908 | 0.26      |
| <b><i>Aspartyl(Asparaginyl)beta-hydroxylase</i></b>                                                           |                           |           |   |        |        |           |
| Q9Y4J0                                                                                                        | K.EGIESGDPGTDDGR.F        | 1404.5874 | 2 | 3.7684 | 0.5693 | 0.36      |
| Q9Y4J0                                                                                                        | K.EGIESGDPGTDDGR.F        | 1404.5874 | 2 | 2.5142 | 0.3463 | 0.36      |
| <b><i>ATP synthase alpha chain, mitochondrial precursor (EC 3.6.3.14)</i></b>                                 |                           |           |   |        |        |           |
| P25705                                                                                                        | K.TGTAEMSSILEER.I         | 1423.6733 | 2 | 3.8487 | 0.5386 | 0.77      |
| P25705                                                                                                        | R.ELIIGDR.Q               | 815.4621  | 1 | 2.0026 | 0.1656 | 0.22      |
| P25705                                                                                                        | R.VLSIGDGIAR[V            | 1004.5866 | 2 | 2.8526 | 0.4199 | 0.38      |
| P25705                                                                                                        | R.ELIIGDR[.Q              | 819.4701  | 1 | 1.9729 | 0.1096 | 0.22      |
| P25705                                                                                                        | R.VLSIGDGIAR.V            | 1000.5786 | 2 | 2.5929 | 0.3203 | 0.38      |
| P25705                                                                                                        | K.AVDSLVIPIGR.G           | 1026.5942 | 2 | 3.0766 | 0.578  | 0.32      |
| P25705                                                                                                        | R.LTDADAMK[Y              | 868.4211  | 1 | 2.073  | 0.2054 | 0.12      |
| P25705                                                                                                        | K.AVDSLVIPIGR[G           | 1030.6022 | 1 | 2.1591 | 0.2203 | 0.62      |
| P25705                                                                                                        | K.AVDSLVIPIGR.G           | 1026.5942 | 1 | 1.9243 | 0.375  | 0.61      |
| P25705                                                                                                        | R.FNDGSDEK.K              | 911.3741  | 2 | 2.7129 | 0.2535 | 0.23      |
| P25705                                                                                                        | K.AVDSLVIPIGR.G           | 1026.5942 | 2 | 2.4601 | 0.3902 | 0.32      |
| P25705                                                                                                        | R.TGAIVDVPVGEELLGR[V      | 1628.8985 | 2 | 3.5287 | 0.3383 | 1.20      |

| Acc #                                                                                                   | Peptide                   | MH+       | z | XC     | DCN    | H/L ratio |
|---------------------------------------------------------------------------------------------------------|---------------------------|-----------|---|--------|--------|-----------|
| P25705                                                                                                  | R.EPMQTGIK.A              | 903.4604  | 1 | 1.9365 | 0.2242 | 2.60      |
| P25705                                                                                                  | K.AVDSLVPPIGR.G           | 1026.5942 | 2 | 3.0327 | 0.5883 | 0.35      |
| P25705                                                                                                  | R.TGAIVDVPVGEELLGR.V      | 1624.8905 | 2 | 2.8547 | 0.5265 | 1.64      |
| P25705                                                                                                  | R.FNDGSDEK.K              | 911.3741  | 1 | 2.0677 | 0.2809 | 0.42      |
| P25705                                                                                                  | R.ELIIGDR.Q               | 815.4621  | 1 | 1.9248 | 0.1114 | 0.23      |
| P25705                                                                                                  | K.AVDSLVPPIGR.G           | 1026.5942 | 1 | 2.1381 | 0.425  | 0.34      |
| P25705                                                                                                  | K.AVDSLVPPIGR.G           | 1026.5942 | 1 | 2.1506 | 0.4655 | 0.81      |
| P25705                                                                                                  | R.ILGADTSVDLEETGR.V       | 1575.7861 | 2 | 4.8393 | 0.5628 | 1.08      |
| P25705                                                                                                  | K.LELAQYR.E               | 892.4887  | 1 | 1.9911 | 0.2211 | 1.01      |
| P25705                                                                                                  | R.TGAIVDVPVGEELLGR.V      | 1624.8905 | 2 | 3.8239 | 0.5479 | 0.80      |
| P25705                                                                                                  | K.TSIAIDTIINQK.R          | 1316.742  | 2 | 3.7828 | 0.2722 | 0.44      |
| P25705                                                                                                  | K.TSIAIDTIINQK.R          | 1316.742  | 2 | 3.6439 | 0.435  | 0.44      |
| P25705                                                                                                  | R.VLSIGDGIAR.V            | 1000.5786 | 2 | 2.226  | 0.3094 | 0.27      |
| P25705                                                                                                  | R.TGAIVDVPVGEELLGR.V      | 1624.8905 | 2 | 4.311  | 0.5605 | 0.78      |
| <b><i>ATP synthase beta chain, mitochondrial precursor (EC 3.6.3.14)</i></b>                            |                           |           |   |        |        |           |
| P06576                                                                                                  | K.VLDSGAPIKIPVGPETLGR.I   | 1919.096  | 2 | 3.6348 | 0.5321 | 0.36      |
| P06576                                                                                                  | K.IPVGPETLGR.I            | 1038.5942 | 1 | 2.7726 | 0.4105 | 0.31      |
| P06576                                                                                                  | K.VVDLLAPYAK.G            | 1088.635  | 1 | 2.6209 | 0.3918 | 0.41      |
| P06576                                                                                                  | K.VVDLLAPYAK.G            | 1088.635  | 1 | 2.1423 | 0.3224 | 0.50      |
| P06576                                                                                                  | R.AIAELGIYPAVDPLDSTSR.I   | 1988.0335 | 2 | 4.6401 | 0.5969 | 0.41      |
| P06576                                                                                                  | K.VALVYQGMNEPPGAR.A       | 1601.8104 | 2 | 3.4399 | 0.4323 | 0.58      |
| P06576                                                                                                  | R.IPSAVGYQPTLATDMGMTMQR.I | 2266.0842 | 2 | 5.0319 | 0.6729 | 0.53      |
| P06576                                                                                                  | R.TIAMDGTEGLVR.G          | 1262.6409 | 2 | 2.9888 | 0.3167 | 0.21      |
| P06576                                                                                                  | K.VLDSGAPIK.I             | 899.5197  | 1 | 2.1032 | 0.3619 | 0.74      |
| P06576                                                                                                  | K.IPVGPETLGR.I            | 1038.5942 | 1 | 2.4551 | 0.2697 | 0.26      |
| P06576                                                                                                  | R.IMNVIGEPIDER].G         | 1389.7173 | 2 | 3.9778 | 0.3267 | 0.59      |
| P06576                                                                                                  | R.IMNVIGEPIDER.G          | 1385.7093 | 2 | 3.6385 | 0.4971 | 0.59      |
| P06576                                                                                                  | R.TIAMDGTEGLVR.G          | 1262.6409 | 2 | 3.4373 | 0.5083 | 0.13      |
| P06576                                                                                                  | K.IPVGPETLGR.I            | 1038.5942 | 1 | 2.8809 | 0.3844 | 0.30      |
| P06576                                                                                                  | R.AIAELGIYPAVDPLDSTSR.I   | 1988.0335 | 2 | 2.6007 | 0.4884 | 0.49      |
| <b><i>ATP synthase coupling factor 6, mitochondrial precursor (EC 3.6.3.14) (ATPase subunit F6)</i></b> |                           |           |   |        |        |           |
| P18859                                                                                                  | R.QTSGGPVDASSEYQQELER.E   | 2080.9418 | 2 | 5.2328 | 0.6064 | 0.93      |
| <b><i>ATP synthase D chain, mitochondrial (EC 3.6.3.14)</i></b>                                         |                           |           |   |        |        |           |
| O75947                                                                                                  | R.LAALPENPPAIDWAYYK.A     | 1931.9902 | 2 | 4.0681 | 0.4824 | 2.23      |
| O75947                                                                                                  | K.AGLVDDFEK.K             | 993.4888  | 2 | 2.6613 | 0.1975 | 0.13      |

| Acc #                                                                                                          | Peptide                     | MH+       | z | XC     | DCN    | H/L ratio |
|----------------------------------------------------------------------------------------------------------------|-----------------------------|-----------|---|--------|--------|-----------|
| O75947                                                                                                         | K.AGLVDDFEK.K               | 993.4888  | 1 | 1.9111 | 0.219  | 0.10      |
| O75947                                                                                                         | K.AGLVDDFEK.K               | 993.4888  | 1 | 1.9376 | 0.1638 | 0.14      |
| O75947                                                                                                         | R.LAALPENPPAIDWAYYK[L.A     | 1935.9982 | 2 | 3.0622 | 0.3789 | 2.23      |
| O75947                                                                                                         | K.AGLVDDFEK.K               | 993.4888  | 1 | 2.0714 | 0.2039 | 0.29      |
| <b><i>ATP synthase delta chain, mitochondrial precursor (EC 3.6.3.14)</i></b>                                  |                             |           |   |        |        |           |
| P30049                                                                                                         | K.AQAEELVGTAEATR[L.A        | 1435.7154 | 2 | 3.7319 | 0.4232 | 1.55      |
| <b><i>ATP synthase e chain, mitochondrial (EC 3.6.3.14)</i></b>                                                |                             |           |   |        |        |           |
| P56385                                                                                                         | R.ELAEDDSILK.-              | 1132.5732 | 1 | 2.6403 | 0.1065 | 0.15      |
| P56385                                                                                                         | R.ELAEDDSILK.-              | 1132.5732 | 1 | 2.7343 | 0.091  | 0.10      |
| P56385                                                                                                         | R.ELAEDDSILK.-              | 1132.5732 | 1 | 2.1288 | 0.2411 | 0.10      |
| P56385                                                                                                         | R.ELAEDDSILK.-              | 1132.5732 | 1 | 2.2688 | 0.3171 | 0.10      |
| P56385                                                                                                         | R.ELAEDDSILK.-              | 1132.5732 | 1 | 2.63   | 0.1087 | 0.10      |
| P56385                                                                                                         | R.ELAEDDSILK.-              | 1132.5732 | 1 | 2.227  | 0.2934 | 0.15      |
| P56385                                                                                                         | -.VPPVQVSPLIK.L             | 1176.7351 | 2 | 2.4016 | 0.3292 | 0.67      |
| <b><i>ATP synthase g chain, mitochondrial (EC 3.6.3.14) (ATPase subunit G)</i></b>                             |                             |           |   |        |        |           |
| O75964                                                                                                         | K.IVNSAQTGSFK.Q             | 1151.6055 | 1 | 2.2891 | 0.3657 | 0.37      |
| O75964                                                                                                         | K.IVNSAQTGSFK.Q             | 1151.6055 | 2 | 3.1396 | 0.5648 | 0.44      |
| O75964                                                                                                         | K.IVNSAQTGSFK[L.Q           | 1155.6135 | 1 | 2.1805 | 0.3865 | 0.37      |
| O75964                                                                                                         | K.IVNSAQTGSFK.Q             | 1151.6055 | 1 | 2.2135 | 0.486  | 0.37      |
| <b><i>ATP synthase gamma chain, mitochondrial precursor (EC 3.6.3.14)</i></b>                                  |                             |           |   |        |        |           |
| P36542                                                                                                         | R.THSDQFLVAFK[L.E           | 1296.6714 | 2 | 2.4223 | 0.3128 | 0.52      |
| P36542                                                                                                         | R.THSDQFLVAFK.E             | 1292.6634 | 2 | 2.9288 | 0.5005 | 0.25      |
| P36542                                                                                                         | K.EVMLVGIGDK.I              | 1060.5707 | 1 | 2.8721 | 0.4574 | 0.54      |
| P36542                                                                                                         | K.EVMLVGIGDK.I              | 1060.5707 | 1 | 2.5732 | 0.3065 | 0.26      |
| <b><i>ATP synthase O subunit, mitochondrial precursor (EC 3.6.3.14) (Oligomycin sensitivity conferral)</i></b> |                             |           |   |        |        |           |
| P48047                                                                                                         | K.SFLSQGQVLK[L.L            | 1110.6284 | 2 | 2.3338 | 0.3292 | 0.83      |
| P48047                                                                                                         | K.VAASVLNPYVK.R             | 1160.6674 | 1 | 2.3375 | 0.4208 | 0.04      |
| P48047                                                                                                         | K.VAASVLNPYVK.R             | 1160.6674 | 2 | 3.4735 | 0.5028 | 0.14      |
| P48047                                                                                                         | R.GEVPC*TVTSASPLEEATLSELK.T | 2318.1432 | 2 | 4.1369 | 0.702  | 1.07      |
| P48047                                                                                                         | K.SFLSQGQVLK.L              | 1106.6204 | 1 | 1.9651 | 0.2884 | 0.55      |
| P48047                                                                                                         | K.SFLSQGQVLK.L              | 1106.6204 | 2 | 2.7249 | 0.5528 | 0.83      |
| P48047                                                                                                         | R.GEVPC*TVTSASPLEEATLSELK.T | 2318.1432 | 2 | 4.3242 | 0.659  | 1.32      |
| P48047                                                                                                         | K.SFLSQGQVLK.L              | 1106.6204 | 2 | 2.6159 | 0.502  | 1.20      |
| <b><i>ATPase family AAA domain containing protein 1</i></b>                                                    |                             |           |   |        |        |           |
| Q8NBU5                                                                                                         | K.DTVILPIK.K                | 898.5608  | 1 | 2.3637 | 0.4174 | 0.13      |



| Acc #                                                                                                         | Peptide                  | MH+       | z | XC     | DCN    | H/L ratio |
|---------------------------------------------------------------------------------------------------------------|--------------------------|-----------|---|--------|--------|-----------|
| Q8NBU5                                                                                                        | K.DTVILPIK.K             | 898.5608  | 1 | 2.3799 | 0.2664 | 0.13      |
| Q8NBU5                                                                                                        | R.FINLQPSTLTDK.W         | 1376.742  | 2 | 2.9193 | 0.4107 | 0.03      |
| Q8NBU5                                                                                                        | K.DTVILPIK.K             | 898.5608  | 1 | 1.9319 | 0.3795 | 2.15      |
| <b><i>ATP-binding cassette sub-family A member 12 (ATP-binding cassette transporter 12) (ATP-binding)</i></b> |                          |           |   |        |        |           |
| Q86UK0                                                                                                        | K.MLTGDIIPSSGNILIR.N     | 1699.9411 | 2 | 2.2357 | 0.2752 | 2.19      |
| <b><i>ATP-binding cassette sub-family D member 1 (Adrenoleukodystrophy protein) (ALDP)</i></b>                |                          |           |   |        |        |           |
| P33897                                                                                                        | R.GLQAPAGEPTQEASGVAAAK.A | 1852.9399 | 2 | 5.2088 | 0.6485 | 1.95      |
| P33897                                                                                                        | R.GLQAPAGEPTQEASGVAAAK.A | 1852.9399 | 2 | 5.0644 | 0.6384 | 1.01      |
| P33897                                                                                                        | R.ELEDAQAGSGTIGR.S       | 1403.6761 | 2 | 3.7786 | 0.5674 | 0.62      |
| P33897                                                                                                        | K.DAGIALLSITHR.P         | 1266.7165 | 2 | 3.7231 | 0.444  | 0.31      |
| P33897                                                                                                        | R.TAVLLALAAYGAHK.V       | 1398.8104 | 2 | 3.4657 | 0.557  | 0.47      |
| P33897                                                                                                        | R.NLLTAAADAIER.I         | 1257.6797 | 2 | 3.2762 | 0.5198 | 0.09      |
| <b><i>ATP-binding cassette sub-family D member 3 (70 kDa peroxisomal membrane protein) (PMP70)</i></b>        |                          |           |   |        |        |           |
| P28288                                                                                                        | R.DLNFEVR[.S             | 896.4603  | 1 | 2.3262 | 0.1808 | 1.04      |
| P28288                                                                                                        | R.ITELMQVLK.D            | 1074.6227 | 2 | 2.7454 | 0.4653 | 0.67      |
| P28288                                                                                                        | R.DLNFEVR.S              | 892.4523  | 2 | 2.2795 | 0.3568 | 0.27      |
| P28288                                                                                                        | R.DLNFEVR.S              | 892.4523  | 1 | 2.2997 | 0.2036 | 1.04      |
| P28288                                                                                                        | K.FDHVPLATPNGDVLIR[.D    | 1767.9519 | 2 | 3.6449 | 0.3449 | 0.45      |
| P28288                                                                                                        | R.DQVIYPDGR.E            | 1062.5214 | 2 | 2.2105 | 0.3351 | 0.45      |
| P28288                                                                                                        | K.FDHVPLATPNGDVLIR.D     | 1763.9439 | 2 | 3.2123 | 0.5129 | 0.45      |
| P28288                                                                                                        | R.PFLDLSHPR.H            | 1081.5789 | 2 | 3.2434 | 0.3988 | 0.07      |
| P28288                                                                                                        | R.DQVIYPDGR.E            | 1062.5214 | 1 | 2.1845 | 0.2868 | 0.33      |
| P28288                                                                                                        | R.DQVIYPDGR.E            | 1062.5214 | 1 | 2.3109 | 0.1551 | 0.33      |
| <b><i>ATP-binding cassette sub-family G member 2 (Placenta-specific ATP-binding cassette transporter)</i></b> |                          |           |   |        |        |           |
| Q9UNQ0                                                                                                        | R.VIQELGLDK.V            | 1014.583  | 2 | 3.0177 | 0.3041 | 0.15      |
| Q9UNQ0                                                                                                        | K.ATEIIEPSK.Q            | 987.5357  | 1 | 2.0232 | 0.2845 | 0.15      |
| Q9UNQ0                                                                                                        | K.VGTQFIR.G              | 820.4676  | 1 | 2.0238 | 0.2071 | 1.22      |
| Q9UNQ0                                                                                                        | K.SLLDVLAAR.K            | 1044.6048 | 1 | 2.0431 | 0.3501 | 0.54      |
| Q9UNQ0                                                                                                        | K.VGTQFIR.G              | 820.4676  | 1 | 1.9684 | 0.1283 | 1.45      |
| Q9UNQ0                                                                                                        | R.VIQELGLDK.V            | 1014.583  | 1 | 2.3869 | 0.416  | 0.16      |
| Q9UNQ0                                                                                                        | K.PGLNAILGPTGGGK.S       | 1251.7056 | 2 | 4.1023 | 0.4446 | 2.82      |
| Q9UNQ0                                                                                                        | K.ATEIIEPSK.Q            | 987.5357  | 1 | 2.2986 | 0.1822 | 0.15      |
| Q9UNQ0                                                                                                        | R.TIIFSIHQPR.Y           | 1211.6895 | 2 | 2.8926 | 0.4252 | 0.75      |
| Q9UNQ0                                                                                                        | K.ATEIIEPSK.Q            | 987.5357  | 1 | 2.0328 | 0.2716 | 0.05      |
| Q9UNQ0                                                                                                        | K.SLLDVLAAR.K            | 1044.6048 | 2 | 2.658  | 0.3183 | 0.53      |

| Acc #                                                                                                        | Peptide                        | MH+       | z | XC     | DCN    | H/L ratio |
|--------------------------------------------------------------------------------------------------------------|--------------------------------|-----------|---|--------|--------|-----------|
| Q9UNQ0                                                                                                       | R.VIQELGLDK.V                  | 1014.583  | 1 | 2.2646 | 0.3424 | 0.09      |
| Q9UNQ0                                                                                                       | R.VIQELGLDK.V                  | 1014.583  | 1 | 2.181  | 0.2753 | 0.16      |
| Q9UNQ0                                                                                                       | R.KDPSGLSGDVLINGAPR.P          | 1695.9024 | 2 | 3.3053 | 0.5589 | 0.16      |
| Q9UNQ0                                                                                                       | K.ATEIIEPSK.Q                  | 987.5357  | 1 | 2.3074 | 0.2402 | 0.05      |
| Q9UNQ0                                                                                                       | K.SSLLDVLAAR[K                 | 1048.6128 | 1 | 2.2245 | 0.3245 | 0.54      |
| <b><i>ATP-dependent RNA helicase DDX1 (EC 3.6.1.-) (DEAD box protein 1) (DEAD box protein)</i></b>           |                                |           |   |        |        |           |
| Q92499                                                                                                       | K.NQALFPAC*VLKNAELKFNFGEEEFK[F | 2947.4789 | 3 | 3.3837 | 0.2259 | 2.08      |
| <b><i>Autophagy protein 3-like (APG3-like) (hAp3) (PC3-96 protein)</i></b>                                   |                                |           |   |        |        |           |
| Q9NT62                                                                                                       | R.TYDLYITYDKYYQTPR[L           | 2107.0149 | 2 | 2.516  | 0.1074 | 1.82      |
| <b><i>Autophagy protein 9-like 1 (APG9-like 1)</i></b>                                                       |                                |           |   |        |        |           |
| Q7Z3C6                                                                                                       | R.ESDESGESAPDEGGEGAR[A         | 1782.7027 | 2 | 3.4797 | 0.3897 | 1.46      |
| <b><i>B aggressive lymphoma protein</i></b>                                                                  |                                |           |   |        |        |           |
| Q8IXQ6                                                                                                       | K.FGC*ISTLVSPVQEGNSK.S         | 1822.9004 | 2 | 2.434  | 0.2143 | 0.87      |
| <b><i>BAG family molecular chaperone regulator 2 (BCL2-associated athanogene 2) (BAG-2)</i></b>              |                                |           |   |        |        |           |
| O95816                                                                                                       | R.LLESLDQLELR[V                | 1332.75   | 2 | 3.3921 | 0.3237 | 0.41      |
| O95816                                                                                                       | R.LLESLDQLELR.V                | 1328.742  | 2 | 4.0268 | 0.3869 | 0.41      |
| O95816                                                                                                       | K.TLQQNAESR.F                  | 1046.5225 | 1 | 2.0149 | 0.1727 | 1.14      |
| <b><i>Bardet-Biedl syndrome 2 protein</i></b>                                                                |                                |           |   |        |        |           |
| Q9BXC9                                                                                                       | R.NYEENAK.A                    | 867.3843  | 1 | 2.0976 | 0.1334 | 0.08      |
| Q9BXC9                                                                                                       | R.NYEENAK.A                    | 867.3843  | 1 | 2.04   | 0.1384 | 0.97      |
| Q9BXC9                                                                                                       | R.NYEENAK.A                    | 867.3843  | 1 | 2.1729 | 0.1418 | 0.19      |
| <b><i>Basigin precursor (CD147 antigen) (Leukocyte activation antigen M6) (Collagenase stimulatory)</i></b>  |                                |           |   |        |        |           |
| P35613                                                                                                       | K.EDALPGQK.T                   | 857.4363  | 1 | 2.1153 | 0.3096 | 0.82      |
| P35613                                                                                                       | R.FFVSSSQGR.S                  | 1014.5003 | 1 | 2.6565 | 0.409  | 0.42      |
| P35613                                                                                                       | K.GSDQAIITLR.V                 | 1073.5949 | 1 | 2.1307 | 0.2812 | 0.24      |
| P35613                                                                                                       | K.EDALPGQK.T                   | 857.4363  | 1 | 2.1645 | 0.171  | 0.38      |
| <b><i>B-cell lymphoma/leukemia 11B (B-cell CLL/lymphoma 11B) (Radiation-induced tumor suppressor)</i></b>    |                                |           |   |        |        |           |
| Q9C0K0                                                                                                       | R.GGGFAPGTEPFPGLFPR.K          | 1703.854  | 2 | 2.5239 | 0.1244 | 0.27      |
| <b><i>B-cell receptor-associated protein 29 (BCR-associated protein Bap29)</i></b>                           |                                |           |   |        |        |           |
| Q9UHQ4                                                                                                       | K.EYDQLLK.E                    | 908.4724  | 1 | 2.1049 | 0.1511 | 0.28      |
| Q9UHQ4                                                                                                       | K.EYDQLLK.E                    | 908.4724  | 1 | 2.083  | 0.1769 | 0.34      |
| <b><i>B-cell receptor-associated protein 31 (BCR-associated protein Bap31) (p28 Bap31) (CDM protein)</i></b> |                                |           |   |        |        |           |
| P51572                                                                                                       | K.LKDELASTK.Q                  | 1004.5623 | 2 | 3.0098 | 0.3154 | 0.33      |
| P51572                                                                                                       | K.LKDELASTK[.Q                 | 1008.5703 | 2 | 2.7348 | 0.1531 | 0.33      |

| Acc #  | Peptide                | MH+       | z | XC     | DCN    | H/L ratio |
|--------|------------------------|-----------|---|--------|--------|-----------|
| P51572 | K.LQAAVDGPMDDK.K       | 1144.5667 | 1 | 1.9635 | 0.4228 | 0.08      |
| P51572 | R.LVTLSQQATLLASNEAFK.K | 2047.1434 | 2 | 2.7579 | 0.3968 | 0.44      |
| P51572 | K.YMEENDQLK.K          | 1169.5143 | 1 | 1.9326 | 0.1312 | 0.19      |
| P51572 | K.LQAAVDGPMDDK.K       | 1144.5667 | 1 | 2.1836 | 0.3546 | 0.08      |
| P51572 | K.LDVGNAEVK.L          | 944.5047  | 2 | 3.087  | 0.3621 | 0.31      |
| P51572 | K.LKDELASTK.Q          | 1004.5623 | 1 | 2.182  | 0.3932 | 0.21      |
| P51572 | K.LQAAVDGPMDDK.K       | 1144.5667 | 1 | 2.516  | 0.4703 | 0.08      |
| P51572 | K.AENQVLAMR.K          | 1031.5302 | 1 | 2.0222 | 0.222  | 0.19      |
| P51572 | K.LDVGNAEVK.L          | 944.5047  | 2 | 3.08   | 0.3915 | 0.28      |
| P51572 | K.LDVGNAEVK.L          | 944.5047  | 2 | 2.9108 | 0.2819 | 0.71      |
| P51572 | K.AENQVLAMR.K          | 1031.5302 | 1 | 2.1338 | 0.1173 | 0.23      |
| P51572 | K.LQAAVDGPMDDK.K       | 1144.5667 | 2 | 3.0964 | 0.4683 | 0.10      |
| P51572 | K.DELASTK[.Q           | 767.3912  | 1 | 2.0142 | 0.3284 | 0.43      |
| P51572 | K.YDDVTEK.V            | 869.3887  | 1 | 2.4214 | 0.1691 | 0.32      |
| P51572 | K.LDVGNAEVK[.L         | 948.5127  | 2 | 2.563  | 0.2699 | 0.28      |

***Beta crystallin B1***

|        |                        |           |   |        |        |      |
|--------|------------------------|-----------|---|--------|--------|------|
| P53674 | R.AEFGGEC*SNLADRGFDR.V | 1930.8348 | 2 | 2.5747 | 0.0872 | 0.19 |
|--------|------------------------|-----------|---|--------|--------|------|

***Beta-2-microglobulin precursor [Contains: Beta-2-microglobulin variant pI 5.3]***

|        |                |           |   |        |        |      |
|--------|----------------|-----------|---|--------|--------|------|
| P61769 | R.VNHVTLSPK.I  | 1122.6266 | 2 | 2.8432 | 0.5642 | 0.50 |
| P61769 | R.VNHVTLSPK[.I | 1126.6346 | 2 | 2.406  | 0.3905 | 0.50 |

***Bifunctional UDP-N-acetylglucosamine 2-epimerase/N-acetylmannosamine kinase (UDP-GlcNAc-2-***

|        |                      |           |   |        |       |      |
|--------|----------------------|-----------|---|--------|-------|------|
| Q9Y223 | K.DYIVALQHPVTTDIK[.H | 1716.9298 | 2 | 2.3158 | 0.163 | 1.00 |
|--------|----------------------|-----------|---|--------|-------|------|

***Brain acid soluble protein 1 (BASPI protein) (Neuronal axonal membrane protein NAP-22) (22 kDa***

|        |                           |           |   |        |        |      |
|--------|---------------------------|-----------|---|--------|--------|------|
| P80723 | K.KTEAPAAPAAQETK.S        | 1412.738  | 2 | 4.7604 | 0.6182 | 0.62 |
| P80723 | K.ESEPAQAAEPAAEK.E        | 1427.6649 | 2 | 3.2145 | 0.4687 | 0.24 |
| P80723 | K.APEQEQAAPGPAAGGEAPK.A   | 1775.8559 | 2 | 5.1826 | 0.6473 | 0.71 |
| P80723 | K.AEGAATEEEGTPK.E         | 1289.5856 | 2 | 4.4561 | 0.547  | 0.21 |
| P80723 | K.AEGAATEEEGTPK.E         | 1289.5856 | 1 | 2.0237 | 0.3947 | 0.12 |
| P80723 | K.ETPAATEAPSSTPK.A        | 1386.6747 | 2 | 2.6031 | 0.5839 | 0.32 |
| P80723 | K.SDGAPASDSKPGSSEAAPSSK.E | 1932.8781 | 2 | 3.7348 | 0.4294 | 0.16 |
| P80723 | K.KTEAPAAPAAQETK[.S       | 1416.746  | 2 | 2.2564 | 0.1347 | 0.62 |

***Brefeldin A-inhibited guanine nucleotide-exchange protein 1 (Brefeldin A-inhibited GEP 1) (p200***

|        |                    |          |   |       |        |      |
|--------|--------------------|----------|---|-------|--------|------|
| Q9Y6D6 | K.FPEQKLFAALLIK[.C | 1521.917 | 2 | 2.335 | 0.2207 | 1.66 |
|--------|--------------------|----------|---|-------|--------|------|

***BTB/POZ domain-containing protein 5***

|        |                            |           |   |        |        |      |
|--------|----------------------------|-----------|---|--------|--------|------|
| Q9NXS3 | K.ECCAFLESQLDPGNC*IGISR[.F | 2215.9911 | 2 | 2.9027 | 0.0916 | 0.61 |
|--------|----------------------------|-----------|---|--------|--------|------|

| Acc #                                                                                                          | Peptide                   | MH+       | z | XC     | DCN    | H/L ratio |
|----------------------------------------------------------------------------------------------------------------|---------------------------|-----------|---|--------|--------|-----------|
| <b><i>C-4 methylsterol oxidase (EC 1.14.13.72) (Methylsterol monooxygenase)</i></b>                            |                           |           |   |        |        |           |
| Q15800                                                                                                         | R.IFGTDSQYNAYNEK.R        | 1649.7442 | 2 | 4.4459 | 0.601  | 1.79      |
| <b><i>CAAX prenyl protease 1 homolog (EC 3.4.24.84) (Prenyl protein-specific endoprotease 1)</i></b>           |                           |           |   |        |        |           |
| O75844                                                                                                         | K.VYVVEGSK.R              | 880.4775  | 1 | 1.9031 | 0.2592 | 0.20      |
| O75844                                                                                                         | R.NEEEEGNSEEIK.A          | 1277.5492 | 1 | 2.4285 | 0.2163 | 0.05      |
| O75844                                                                                                         | K.VYVVEGSK.R              | 880.4775  | 1 | 2.1941 | 0.3554 | 0.22      |
| O75844                                                                                                         | R.NEEEEGNSEEIK.A          | 1277.5492 | 2 | 2.7341 | 0.2253 | 0.14      |
| O75844                                                                                                         | R.NEEEEGNSEEIK.A          | 1277.5492 | 2 | 3.587  | 0.2997 | 0.08      |
| O75844                                                                                                         | R.NEEEEGNSEEIK.A          | 1277.5492 | 1 | 2.6227 | 0.3134 | 0.06      |
| O75844                                                                                                         | R.NEEEEGNSEEIK.A          | 1277.5492 | 2 | 3.4878 | 0.3042 | 0.08      |
| O75844                                                                                                         | K.DIQEDSGMEPR.N           | 1276.5474 | 2 | 3.7453 | 0.4933 | 0.22      |
| O75844                                                                                                         | K.DIQEDSGMEPR.N           | 1276.5474 | 2 | 2.4397 | 0.3241 | 0.66      |
| O75844                                                                                                         | K.VYVVEGSK.R              | 880.4775  | 1 | 2.362  | 0.2611 | 0.22      |
| <b><i>Cadherin-related tumor suppressor homolog precursor (Fat protein homolog)</i></b>                        |                           |           |   |        |        |           |
| Q14517                                                                                                         | K.VVDLDPCLSKKPLEEK.P      | 1816.9856 | 2 | 2.2951 | 0.1722 | 0.20      |
| <b><i>Calcium-transporting ATPase type 2C member 1 (EC 3.6.3.8) (ATPase 2C1) (ATP-dependent Ca(2+))</i></b>    |                           |           |   |        |        |           |
| P98194                                                                                                         | K.YISQFK.N                | 785.4192  | 1 | 2.0324 | 0.2238 | 0.49      |
| <b><i>Calnexin precursor (Major histocompatibility complex class I antigen-binding protein p88) (p90)</i></b>  |                           |           |   |        |        |           |
| P27824                                                                                                         | K.AEEDEILNR.S             | 1088.5218 | 2 | 3.0822 | 0.3175 | 0.47      |
| P27824                                                                                                         | K.AEEDEILNR.S             | 1088.5218 | 1 | 2.0977 | 0.2533 | 0.26      |
| P27824                                                                                                         | K.AEEDEILNR.S             | 1092.5298 | 2 | 2.7598 | 0.3022 | 0.47      |
| P27824                                                                                                         | K.SDAEEDGGTVSQEEEDR.K     | 1852.7315 | 2 | 5.8799 | 0.6462 | 1.98      |
| <b><i>CAMP/cGMP cyclic nucleotide phosphodiesterase 11A3</i></b>                                               |                           |           |   |        |        |           |
| Q9GZY7                                                                                                         | K.ITRLVQISGASLAEKQEK.H    | 1971.1233 | 2 | 2.3398 | 0.1161 | 0.50      |
| <b><i>Cancer susceptibility candidate gene 5 protein (ALL1-fused gene from chromosome 15q14) (AF15q14)</i></b> |                           |           |   |        |        |           |
| Q8NG31                                                                                                         | R.TTNEIIFHSAAMDEK.V       | 1834.9004 | 2 | 2.3774 | 0.1378 | 0.07      |
| <b><i>Carbamoyl-phosphate synthase [ammonia], mitochondrial precursor (EC 6.3.4.16) (Carbamoyl-</i></b>        |                           |           |   |        |        |           |
| P31327                                                                                                         | K.IEFEGQPVDVDPNK.Q        | 1733.8381 | 2 | 3.9855 | 0.4449 | 0.35      |
| <b><i>Carnitine O-palmitoyltransferase I, mitochondrial liver isoform (EC 2.3.1.21) (CPT I) (CPTI-L)</i></b>   |                           |           |   |        |        |           |
| P50416                                                                                                         | R.SEDPDTSMDSYAK.S         | 1445.5737 | 2 | 3.3997 | 0.5828 | 0.29      |
| P50416                                                                                                         | R.ILDNTSEPQPGEAR.L        | 1526.7445 | 2 | 3.9601 | 0.5603 | 0.41      |
| P50416                                                                                                         | R.ILDNTSEPQPGEAR.L        | 1526.7445 | 2 | 3.9075 | 0.5949 | 0.93      |
| <b><i>Cation-independent mannose-6-phosphate receptor precursor (CI Man-6-P receptor) (CI-MPR)</i></b>         |                           |           |   |        |        |           |
| P11717                                                                                                         | R.C*PPETDDGVPCVFPFIFNGK.S | 2243.0278 | 2 | 2.2974 | 0.2538 | 15.15     |

| Acc #                                                                                                            | Peptide                | MH+       | z | XC     | DCN    | H/L ratio |
|------------------------------------------------------------------------------------------------------------------|------------------------|-----------|---|--------|--------|-----------|
| <b><i>Caveolin-2</i></b>                                                                                         |                        |           |   |        |        |           |
| P51636                                                                                                           | K.LGFEDVIAEPVTTHSFDK.V | 2004.9913 | 2 | 5.101  | 0.5926 | 0.51      |
| P51636                                                                                                           | K.LGFEDVIAEPVTTHSFDK.V | 2004.9913 | 2 | 4.5376 | 0.4771 | 0.51      |
| <b><i>CD59 glycoprotein precursor (Membrane attack complex inhibition factor) (MACIF) (MAC-</i></b>              |                        |           |   |        |        |           |
| P13987                                                                                                           | R.ENELTYYC*C*K.K       | 1379.5606 | 2 | 2.5616 | 0.5142 | 11.73     |
| P13987                                                                                                           | K.AGLQVYNK.C           | 892.4887  | 1 | 1.9699 | 0.2073 | 0.75      |
| P13987                                                                                                           | K.FEHC*NFNDVTTR.L      | 1539.6645 | 2 | 3.9196 | 0.4543 | 0.50      |
| <b><i>CDNA FLJ16643 fis, clone TESTI4029528</i></b>                                                              |                        |           |   |        |        |           |
| Q6ZMV5                                                                                                           | K.DIYLFINVIK.Q         | 1350.8032 | 2 | 2.2609 | 0.1665 | 0.24      |
| <b><i>CDNA PSEC0252 fis, clone NT2RP3003258, highly similar to Likely ortholog of mouse embryonic</i></b>        |                        |           |   |        |        |           |
| Q8NBI5                                                                                                           | R.TFLLMPR.G            | 877.4964  | 1 | 2.098  | 0.2558 | 0.59      |
| Q8NBI5                                                                                                           | R.TFLLMPR.G            | 877.4964  | 1 | 2.1526 | 0.2449 | 0.23      |
| Q8NBI5                                                                                                           | R.TFLLMPR.G            | 877.4964  | 1 | 2.0849 | 0.1085 | 0.23      |
| <b><i>Cell cycle checkpoint protein RAD17 (hRad17) (RF-C/activator 1 homolog)</i></b>                            |                        |           |   |        |        |           |
| O75943                                                                                                           | R.IVTIEANKNGGKITVPDK.T | 1897.0753 | 2 | 2.3137 | 0.2175 | 0.15      |
| <b><i>Cell division cycle 5-like protein (Cdc5-like protein) (Pombe cdc5-related protein)</i></b>                |                        |           |   |        |        |           |
| Q99459                                                                                                           | R.YTRANLASK.K          | 1023.5582 | 1 | 2.2662 | 0.2229 | 0.28      |
| Q99459                                                                                                           | R.YTRANLASK.K          | 1023.5582 | 1 | 2.186  | 0.1256 | 0.20      |
| <b><i>Centaurin-beta 2 (Cnt-b2)</i></b>                                                                          |                        |           |   |        |        |           |
| Q15057                                                                                                           | -MKMTVDFFEECLKDSPR.F   | 1928.8915 | 2 | 3.1083 | 0.0842 | 0.47      |
| <b><i>Centrosomal protein 4 (Centrosomal protein of 135 kDa) (Cep135 protein)</i></b>                            |                        |           |   |        |        |           |
| Q66GS9                                                                                                           | K.FLNNQYAHKLK[L        | 1379.7561 | 2 | 2.9719 | 0.1023 | 0.30      |
| <b><i>Centrosome spindle pole associated protein</i></b>                                                         |                        |           |   |        |        |           |
| Q70F00                                                                                                           | K.EEYEAKLEAEMR.T       | 1497.689  | 2 | 2.4526 | 0.133  | 0.48      |
| <b><i>Ceramide glucosyltransferase (EC 2.4.1.80) (Glucosylceramide synthase) (GCS) (UDP-glucose:N-</i></b>       |                        |           |   |        |        |           |
| Q16739                                                                                                           | K.YPNVDARLFIGGKK.V     | 1577.8798 | 2 | 2.2606 | 0.2006 | 0.61      |
| <b><i>Chemokine-binding protein 2 (Chemokine-binding protein D6) (C-C chemokine receptor D6)</i></b>             |                        |           |   |        |        |           |
| O00590                                                                                                           | R.IGCVLVRLR.P          | 1028.6397 | 1 | 2.1349 | 0.2125 | 0.55      |
| O00590                                                                                                           | R.IGCVLVRLR.P          | 1028.6397 | 1 | 2.2072 | 0.1398 | 3.39      |
| <b><i>Chondroitin sulfate synthase 2 (EC 2.4.1.175) (Glucuronosyl-N-acetylgalactosaminyl-proteoglycan 4-</i></b> |                        |           |   |        |        |           |
| Q8IZ52                                                                                                           | R.NDIVSARPDEWLGR.C     | 1627.8187 | 2 | 3.2042 | 0.2715 | 0.34      |
| <b><i>Chromosome 6 open reading frame 37</i></b>                                                                 |                        |           |   |        |        |           |
| Q5TF85                                                                                                           | K.STEDIFPAQLLKLQR[H    | 1762.9829 | 2 | 2.2582 | 0.1313 | 2.59      |
| Q5TF85                                                                                                           | K.STEDIFPAQLLKLQR.H    | 1758.9749 | 2 | 2.4863 | 0.1111 | 2.59      |

| Acc #                                                                                                            | Peptide                  | MH+       | z | XC     | DCN    | H/L ratio |
|------------------------------------------------------------------------------------------------------------------|--------------------------|-----------|---|--------|--------|-----------|
| <b><i>CKLFSF1 protein</i></b>                                                                                    |                          |           |   |        |        |           |
| Q6PEV5                                                                                                           | R.NISAKTAPR.K            | 957.5476  | 1 | 1.9304 | 0.312  | 0.40      |
| <b><i>Clathrin heavy chain 1 (CLH-17)</i></b>                                                                    |                          |           |   |        |        |           |
| Q00610                                                                                                           | R.TSIDAYDNFDNISLAQR.L    | 1942.9141 | 2 | 4.4304 | 0.5964 | 0.36      |
| Q00610                                                                                                           | K.NNRPSEGPLQTR.L         | 1368.6979 | 2 | 3.2505 | 0.51   | 0.98      |
| <b><i>CMP-sialic acid transporter</i></b>                                                                        |                          |           |   |        |        |           |
| Q5W1L8                                                                                                           | R.QDTTSIQQGETASK.E       | 1493.7078 | 2 | 3.9063 | 0.559  | 1.43      |
| <b><i>Coiled-coil-helix-coiled-coil-helix domain containing protein 3</i></b>                                    |                          |           |   |        |        |           |
| Q9NX63                                                                                                           | R.VAEELALEQAK[K.K        | 1204.655  | 1 | 2.949  | 0.2736 | 0.51      |
| Q9NX63                                                                                                           | R.AAANEQLTR.A            | 973.5061  | 1 | 2.2095 | 0.2985 | 0.26      |
| Q9NX63                                                                                                           | R.VAEELALEQAK.K          | 1200.647  | 2 | 3.9089 | 0.4182 | 0.97      |
| Q9NX63                                                                                                           | R.VAEELALEQAK[K.K        | 1204.655  | 2 | 3.7789 | 0.4046 | 1.05      |
| Q9NX63                                                                                                           | R.VTTEQYQK[A.A           | 1000.5077 | 1 | 2.0402 | 0.3325 | 0.44      |
| Q9NX63                                                                                                           | R.VAEELALEQAK.K          | 1200.647  | 2 | 3.9463 | 0.4423 | 1.05      |
| Q9NX63                                                                                                           | R.VAEELALEQAK[K.K        | 1204.655  | 2 | 3.6713 | 0.3852 | 0.97      |
| Q9NX63                                                                                                           | R.AAANEQLTR.A            | 973.5061  | 1 | 2.0062 | 0.3575 | 0.22      |
| Q9NX63                                                                                                           | K.AAEVEAK.F              | 846.4203  | 2 | 2.4348 | 0.5487 | 0.13      |
| Q9NX63                                                                                                           | R.VAEELALEQAK.K          | 1200.647  | 1 | 2.9626 | 0.2235 | 0.51      |
| Q9NX63                                                                                                           | R.VAEELALEQAK.K          | 1200.647  | 1 | 2.5216 | 0.2689 | 0.46      |
| Q9NX63                                                                                                           | R.VAEELALEQAK.K          | 1200.647  | 1 | 2.6397 | 0.3142 | 0.51      |
| <b><i>Collagen alpha 1(VII) chain precursor (Long-chain collagen) (LC collagen)</i></b>                          |                          |           |   |        |        |           |
| Q02388                                                                                                           | R.GPEASVTQTPVCPR.G       | 1441.7104 | 2 | 2.3273 | 0.1371 | 0.44      |
| Q02388                                                                                                           | R.GPEASVTQTPVCPR.G       | 1441.7104 | 2 | 2.3084 | 0.1901 | 0.44      |
| Q02388                                                                                                           | R.GPEASVTQTPVCPR.G       | 1441.7104 | 2 | 2.2432 | 0.192  | 0.61      |
| <b><i>Complement component 1, Q subcomponent binding protein, mitochondrial precursor (Glycoprotein)</i></b>     |                          |           |   |        |        |           |
| Q07021                                                                                                           | K.AFVDFLSDEIK.E          | 1283.6518 | 2 | 3.3323 | 0.4278 | 0.39      |
| Q07021                                                                                                           | K.AFVDFLSDEIK.E          | 1283.6518 | 2 | 3.9924 | 0.4781 | 0.38      |
| Q07021                                                                                                           | K.VEEQEPELTSTPNFVVEVIK.N | 2287.1704 | 2 | 4.2113 | 0.5383 | 0.68      |
| <b><i>Core1 UDP-galactose:N-acetylgalactosamine-alpha-R beta 1,3-galactosyltransferase (EC 2.4.1.122)</i></b>    |                          |           |   |        |        |           |
| Q9NS00                                                                                                           | K.DENTDIAENLYQK[V.V      | 1556.7206 | 2 | 3.1352 | 0.1936 | 0.30      |
| <b><i>Coronin-7 (70 kDa WD repeat tumor rejection antigen homolog)</i></b>                                       |                          |           |   |        |        |           |
| P57737                                                                                                           | K.GLNLTPGESDGFC*ANKLR.V  | 2050.0022 | 2 | 2.5592 | 0.1718 | 0.04      |
| <b><i>C-X-C chemokine receptor type 4 (CXC-R4) (CXCR-4) (Stromal cell-derived factor 1 receptor) (SDF-1)</i></b> |                          |           |   |        |        |           |
| P61073                                                                                                           | K.TSAQHALTSVSR.G         | 1257.6546 | 2 | 3.9244 | 0.6069 | 0.16      |

| Acc #                                                                                                            | Peptide             | MH+       | z | XC     | DCN    | H/L ratio |
|------------------------------------------------------------------------------------------------------------------|---------------------|-----------|---|--------|--------|-----------|
| <b><i>Cytochrome c oxidase polypeptide Va, mitochondrial precursor (EC 1.9.3.1)</i></b>                          |                     |           |   |        |        |           |
| P20674                                                                                                           | K.GINTLVTYDMVPEPK.I | 1676.8564 | 2 | 3.6044 | 0.5217 | 0.65      |
| P20674                                                                                                           | K.IIDAALR.A         | 771.4723  | 1 | 2.0077 | 0.3061 | 0.56      |
| <b><i>Cytochrome c oxidase polypeptide Vb, mitochondrial precursor (EC 1.9.3.1)</i></b>                          |                     |           |   |        |        |           |
| P10606                                                                                                           | K.GLDPYNVLAPK.G     | 1186.6467 | 2 | 2.9343 | 0.6058 | 0.39      |
| P10606                                                                                                           | R.EDPNLVPSISNK.R    | 1312.6743 | 2 | 3.0988 | 0.5188 | 0.15      |
| P10606                                                                                                           | R.EDPNLVPSISNK.R    | 1312.6743 | 2 | 2.8665 | 0.4313 | 0.18      |
| P10606                                                                                                           | R.EDPNLVPSISNK.R    | 1312.6743 | 1 | 1.9121 | 0.5011 | 0.25      |
| P10606                                                                                                           | R.EDPNLVPSISNK.R    | 1312.6743 | 2 | 2.5644 | 0.2507 | 1.05      |
| <b><i>Cytochrome c oxidase polypeptide VIc precursor (EC 1.9.3.1)</i></b>                                        |                     |           |   |        |        |           |
| P09669                                                                                                           | K.DFEEMR[K.K        | 830.348   | 1 | 2.2891 | 0.2308 | 0.25      |
| P09669                                                                                                           | K.AYADFYR.N         | 905.4152  | 1 | 2.0955 | 0.1459 | 0.51      |
| P09669                                                                                                           | K.AGIFQSVK[-        | 853.4909  | 2 | 2.6576 | 0.142  | 0.42      |
| P09669                                                                                                           | K.AGIFQSVK.-        | 849.4829  | 2 | 2.9165 | 0.1241 | 0.42      |
| <b><i>Cytochrome c oxidase polypeptide VIIa-liver/heart, mitochondrial precursor (EC 1.9.3.1)</i></b>            |                     |           |   |        |        |           |
| P14406                                                                                                           | K.LFQEDDEIPLYLK.G   | 1622.8312 | 2 | 4.2815 | 0.4045 | 25.91     |
| P14406                                                                                                           | K.GGVADALLYR.A      | 1034.5629 | 2 | 3.4082 | 0.4721 | 0.50      |
| P14406                                                                                                           | K.GGVADALLYR.A      | 1034.5629 | 1 | 2.4074 | 0.3751 | 1.04      |
| P14406                                                                                                           | K.GGVADALLYR.A      | 1034.5629 | 1 | 2.5029 | 0.3865 | 0.76      |
| <b><i>Cytochrome c oxidase subunit IV isoform 1, mitochondrial precursor (EC 1.9.3.1) (COX IV-1)</i></b>         |                     |           |   |        |        |           |
| P13073                                                                                                           | K.VNPIQGLASK.W      | 1026.5942 | 2 | 2.4411 | 0.464  | 0.27      |
| P13073                                                                                                           | K.VNPIQGLASK[W      | 1030.6022 | 1 | 2.5272 | 0.321  | 0.83      |
| P13073                                                                                                           | K.VNPIQGLASK.W      | 1026.5942 | 1 | 1.913  | 0.2836 | 0.83      |
| P13073                                                                                                           | K.VNPIQGLASK.W      | 1026.5942 | 1 | 1.9461 | 0.3887 | 0.60      |
| <b><i>Cytochrome c oxidase subunit VIIa-related protein, mitochondrial precursor (COX7a-related protein)</i></b> |                     |           |   |        |        |           |
| O14548                                                                                                           | K.LTSDSTVYDYAGK.N   | 1419.6638 | 2 | 3.0582 | 0.561  | 0.57      |
| O14548                                                                                                           | K.LTSDSTVYDYAGK.N   | 1419.6638 | 2 | 3.1374 | 0.4312 | 0.57      |
| <b><i>Cytochrome c1, heme protein, mitochondrial precursor (Cytochrome c-1)</i></b>                              |                     |           |   |        |        |           |
| P08574                                                                                                           | K.LFDYFPK.P         | 929.4767  | 1 | 1.9033 | 0.2839 | 0.41      |
| P08574                                                                                                           | K.PYPNSEAAR.A       | 1004.4796 | 1 | 2.0772 | 0.1927 | 0.32      |
| P08574                                                                                                           | R.GLLSSLDHTSIR.R    | 1298.7063 | 2 | 2.3526 | 0.4528 | 0.27      |
| P08574                                                                                                           | R.GLLSSLDHTSIR.R    | 1298.7063 | 2 | 2.4619 | 0.3589 | 0.46      |
| P08574                                                                                                           | R.GLLSSLDHTSIR.R    | 1298.7063 | 2 | 3.5359 | 0.5537 | 0.46      |
| P08574                                                                                                           | R.GLLSSLDHTSIR.R    | 1298.7063 | 2 | 3.4453 | 0.5212 | 0.46      |
| P08574                                                                                                           | K.LFDYFPKYPNSEAAR.A | 1914.9385 | 2 | 3.7503 | 0.5341 | 1.82      |

| Acc #                                                                                                          | Peptide                   | MH+       | z | XC     | DCN    | H/L ratio |
|----------------------------------------------------------------------------------------------------------------|---------------------------|-----------|---|--------|--------|-----------|
| <b><i>Cytochrome c-type heme lyase (EC 4.4.1.17) (CCHL) (Holocytochrome c-type synthase)</i></b>               |                           |           |   |        |        |           |
| P53701                                                                                                         | K.GC*PVNTEPSGPTC*EK.K     | 1632.6992 | 2 | 3.1806 | 0.302  | 0.40      |
| <b><i>Cytochrome P450 51A1 (EC 1.14.13.70) (CYPLI) (P450LI) (Sterol 14-alpha demethylase) (Lanosterol)</i></b> |                           |           |   |        |        |           |
| Q16850                                                                                                         | K.DLNLLDR.C               | 858.468   | 1 | 2.1121 | 0.24   | 0.36      |
| <b><i>Cytochrome P450, family 2, subfamily E, polypeptide 2 homolog</i></b>                                    |                           |           |   |        |        |           |
| Q6NT55                                                                                                         | K.C*REEIQEVMKGR.E         | 1534.7465 | 2 | 2.3643 | 0.0842 | 0.19      |
| <b><i>Cytosolic 5'-nucleotidase 1B (EC 3.1.3.5) (Cytosolic 5'-nucleotidase 1B) (cNIB) (cN-IB)</i></b>          |                           |           |   |        |        |           |
| Q96P26                                                                                                         | K.LPSSSTSSR.T             | 921.4636  | 1 | 1.9093 | 0.2112 | 0.60      |
| <b><i>Dapper homolog 1 (hDPRI) (Heptacellular carcinoma novel gene 3 protein)</i></b>                          |                           |           |   |        |        |           |
| Q9NYF0                                                                                                         | K.SGGGPEAGVPGRPAGGGHR[A   | 1676.8342 | 2 | 2.381  | 0.195  | 0.22      |
| <b><i>Death receptor interacting protein splice variant</i></b>                                                |                           |           |   |        |        |           |
| Q6YHU2                                                                                                         | R.AHGHLQSATDTWENLVSDAR[I  | 2212.0508 | 2 | 3.0589 | 0.1926 | 4.97      |
| Q6YHU2                                                                                                         | R.AHGHLQSATDTWENLVSDAR[I  | 2212.0508 | 2 | 2.7206 | 0.135  | 130.58    |
| Q6YHU2                                                                                                         | R.AHGHLQSATDTWENLVSDAR[I  | 2212.0508 | 2 | 3.2826 | 0.2141 | 336.49    |
| <b><i>Dedicator of cytokinesis protein 1 (180 kDa protein downstream of CRK) (DOCK180)</i></b>                 |                           |           |   |        |        |           |
| Q14185                                                                                                         | R.PFGVAVMDVTDIINGK[V      | 1679.8804 | 2 | 2.6455 | 0.2154 | 188.67    |
| <b><i>Defender against cell death 1 (DAD-1)</i></b>                                                            |                           |           |   |        |        |           |
| P61803                                                                                                         | R.FLEEYLSSTPQR.L          | 1469.7271 | 2 | 4.0135 | 0.4848 | 0.54      |
| P61803                                                                                                         | K.ADFQGISPER.A            | 1119.5429 | 2 | 2.8513 | 0.3846 | 0.16      |
| P61803                                                                                                         | R.FLEEYLSSTPQR[L          | 1473.7351 | 2 | 3.3565 | 0.3075 | 0.54      |
| <b><i>Dehydrogenase E1 and transketolase domain containing protein 1</i></b>                                   |                           |           |   |        |        |           |
| Q96HY7                                                                                                         | R.IGGSVHLIVNNQLGYTTPAER.G | 2239.183  | 2 | 2.6639 | 0.0955 | 1.67      |
| Q96HY7                                                                                                         | R.IGGSVHLIVNNQLGYTTPAER.G | 2239.183  | 2 | 2.8653 | 0.1268 | 1.58      |
| <b><i>Dehydrogenase/reductase SDR family member 8 precursor (EC 1.1.1.-) (17-beta-hydroxysteroid)</i></b>      |                           |           |   |        |        |           |
| Q8NBQ5                                                                                                         | R.EDIYSSAK.K              | 912.4309  | 1 | 2.254  | 0.1894 | 0.52      |
| Q8NBQ5                                                                                                         | R.EDIYSSAK.K              | 912.4309  | 1 | 2.0332 | 0.3589 | 0.73      |
| Q8NBQ5                                                                                                         | K.FDAVIGYK.M              | 912.4825  | 1 | 2.1658 | 0.3674 | 0.08      |
| <b><i>DEP domain containing 6</i></b>                                                                          |                           |           |   |        |        |           |
| Q8TB45                                                                                                         | R.KDDGTFPLDNEVK[A         | 1481.7249 | 2 | 2.7659 | 0.1211 | 0.38      |
| <b><i>DEP domain containing protein 5</i></b>                                                                  |                           |           |   |        |        |           |
| O75140                                                                                                         | R.TRLLLLPAC*VTATK.R       | 1590.9036 | 2 | 2.6356 | 0.2387 | 0.17      |
| <b><i>Dermcidin precursor (Preproteolysin) [Contains: Survival-promoting peptide; DCD-1]</i></b>               |                           |           |   |        |        |           |
| P81605                                                                                                         | K.ENAGEDPGLAR[Q           | 1132.536  | 2 | 2.7324 | 0.3503 | 0.75      |
| P81605                                                                                                         | K.ENAGEDPGLAR.Q           | 1128.528  | 2 | 2.8265 | 0.4668 | 0.75      |



| Acc #                                                                                                            | Peptide                   | MH+       | z | XC     | DCN    | H/L ratio |
|------------------------------------------------------------------------------------------------------------------|---------------------------|-----------|---|--------|--------|-----------|
| <b><i>Desmoglein 2, preproprotein</i></b>                                                                        |                           |           |   |        |        |           |
| Q4KKU6                                                                                                           | K.SLQEANA EK.V            | 989.4898  | 1 | 2.1814 | 0.2124 | 0.08      |
| Q4KKU6                                                                                                           | K.VVPSFLPVDQGGSLVGR.N     | 1726.9486 | 2 | 3.3991 | 0.5838 | 0.49      |
| Q4KKU6                                                                                                           | K.VVPSFLPVDQGGSLVGR.N     | 1726.9486 | 2 | 3.5562 | 0.53   | 0.27      |
| <b><i>Desmoplakin (DP) (250/210 kDa paraneoplastic pemphigus antigen)</i></b>                                    |                           |           |   |        |        |           |
| P15924                                                                                                           | K.GFFDPNTEENLTYLQLK.E     | 2028.9913 | 2 | 3.0008 | 0.3241 | 0.50      |
| <b><i>DGKG protein</i></b>                                                                                       |                           |           |   |        |        |           |
| Q5FWG1                                                                                                           | K.YTVHERCVSRNIPGCVK.T     | 1960.9844 | 2 | 2.319  | 0.2581 | 0.47      |
| <b><i>Diaclyglycerol O-acyltransferase 1 (EC 2.3.1.20) (Diglyceride acyltransferase) (ACAT-related gene)</i></b> |                           |           |   |        |        |           |
| O75907                                                                                                           | R.LQDSLFS SSGFSNYR.G      | 1822.8242 | 2 | 4.1123 | 0.6259 | 1.91      |
| O75907                                                                                                           | R.DAAAGPDVGAAGDAPAPAPNK.D | 1832.8773 | 2 | 5.7508 | 0.6877 | 0.20      |
| <b><i>Disks large-associated protein 3 (DAP-3) (SAP90/PSD-95-associated protein 3) (SAPAP3) (PSD-</i></b>        |                           |           |   |        |        |           |
| O95886                                                                                                           | R.LPPTLLDQFEK.Q           | 1300.7147 | 2 | 2.2318 | 0.194  | 0.37      |
| <b><i>DNA ligase IV (Ligase IV, DNA, ATP-dependent)</i></b>                                                      |                           |           |   |        |        |           |
| Q8IY66                                                                                                           | K.SLLQLITQSSALEQKJ.W      | 1662.9403 | 2 | 3.0547 | 0.1299 | 37.85     |
| <b><i>DNA nucleotidylexotransferase (EC 2.7.7.31) (Terminal addition enzyme) (Terminal</i></b>                   |                           |           |   |        |        |           |
| P04053                                                                                                           | K.MILDNHALYDKTK.R         | 1561.8043 | 2 | 2.3462 | 0.1272 | 0.18      |
| <b><i>DNA replication licensing factor MCM3 (DNA polymerase alpha holoenzyme-associated protein P1)</i></b>      |                           |           |   |        |        |           |
| P25205                                                                                                           | R.GSSGVGLTAAVTTDQETGER[R  | 1939.9334 | 2 | 2.3587 | 0.1379 | 27.59     |
| <b><i>DNA-directed RNA polymerase III 62 kDa polypeptide (EC 2.7.7.6) (RNA polymerase C subunit 3)</i></b>       |                           |           |   |        |        |           |
| Q9BUI4                                                                                                           | R.C*YKSIANLIERR.Q         | 1522.8159 | 2 | 2.6957 | 0.1272 | 0.66      |
| <b><i>DNA-directed RNA polymerase, mitochondrial precursor (EC 2.7.7.6) (MtRPOL)</i></b>                         |                           |           |   |        |        |           |
| O00411                                                                                                           | R.NVQQIGILK[P             | 1016.623  | 1 | 1.9334 | 0.2382 | 6.29      |
| <b><i>DnaJ (Hsp40) homolog, subfamily D, member 1 (Growth-inhibiting 22) (DNAJ domain-containing)</i></b>        |                           |           |   |        |        |           |
| Q5T219                                                                                                           | K.DLLETTTK.H              | 920.4935  | 1 | 1.9506 | 0.103  | 0.12      |
| <b><i>Dolichyldiphosphatase 1 (EC 3.6.1.43) (Dolichyl pyrophosphate phosphatase 1)</i></b>                       |                           |           |   |        |        |           |
| Q86YN1                                                                                                           | R.PC*GGPHTAVGTK.Y         | 1181.5732 | 2 | 2.7169 | 0.4702 | 0.58      |
| <b><i>Dolichyl-diphosphooligosaccharide-protein glycosyltransferase</i></b>                                      |                           |           |   |        |        |           |
| Q5VWA5                                                                                                           | R.ELGSEC*GIEFDEEK.T       | 1641.6949 | 2 | 4.4459 | 0.6128 | 0.16      |
| Q5VWA5                                                                                                           | K.SSLNPILFR.G             | 1046.5993 | 1 | 1.9957 | 0.221  | 0.63      |
| Q5VWA5                                                                                                           | K.NTLIAGLQAR.N            | 1169.7001 | 1 | 2.5101 | 0.4436 | 0.46      |
| Q5VWA5                                                                                                           | R.TLVLLDNLNVR.E           | 1269.7525 | 2 | 2.2677 | 0.2771 | 0.20      |
| Q5VWA5                                                                                                           | K.SSLNPILFR.G             | 1046.5993 | 2 | 2.3878 | 0.3122 | 0.51      |
| Q5VWA5                                                                                                           | K.SSLNPILFR[G             | 1050.6073 | 1 | 2.2722 | 0.2895 | 0.63      |

| Acc #                                                                                              | Peptide             | MH+       | z | XC     | DCN    | H/L ratio |
|----------------------------------------------------------------------------------------------------|---------------------|-----------|---|--------|--------|-----------|
| Q5VWA5                                                                                             | K.TADDPSSLIK.Y      | 1159.6205 | 2 | 2.954  | 0.4008 | 0.27      |
| <i>Dolichyl-diphosphooligosaccharide--protein glycosyltransferase 67 kDa subunit precursor (EC</i> |                     |           |   |        |        |           |
| P04843                                                                                             | R.DISTLNSGK[K       | 938.492   | 1 | 2.5026 | 0.3931 | 0.14      |
| P04843                                                                                             | R.NVESYTK.L         | 840.4098  | 1 | 1.9693 | 0.3205 | 0.51      |
| P04843                                                                                             | K.TILPAAAQDVYYR[D   | 1484.7875 | 2 | 3.1564 | 0.3788 | 0.45      |
| P04843                                                                                             | R.SEDLLDYGPF.R      | 1311.6216 | 2 | 3.6823 | 0.4585 | 0.51      |
| P04843                                                                                             | K.TILPAAAQDVYYR.D   | 1480.7795 | 2 | 3.1228 | 0.4344 | 0.45      |
| P04843                                                                                             | K.GEDEEENNLEVR[E    | 1436.6267 | 2 | 3.2205 | 0.2587 | 1.00      |
| P04843                                                                                             | R.SEDLLDYGPF.R      | 1311.6216 | 2 | 2.8926 | 0.4648 | 0.48      |
| P04843                                                                                             | R.DISTLNSGK[K       | 938.492   | 1 | 2.4809 | 0.3938 | 0.12      |
| P04843                                                                                             | K.ALTSEIALLQSR.L    | 1301.7423 | 1 | 2.568  | 0.4251 | 0.59      |
| P04843                                                                                             | R.DISTLNSGK.K       | 934.484   | 1 | 1.9659 | 0.4551 | 0.07      |
| P04843                                                                                             | K.NIEIDSPYEISR.A    | 1435.7063 | 1 | 2.0733 | 0.4263 | 0.54      |
| P04843                                                                                             | K.NIEIDSPYEISR.A    | 1435.7063 | 2 | 3.2098 | 0.3545 | 0.56      |
| P04843                                                                                             | R.DISTLNSGK.K       | 934.484   | 1 | 2.1562 | 0.4976 | 0.14      |
| P04843                                                                                             | R.ATSFLLALEPELEAR.L | 1659.8952 | 2 | 2.6659 | 0.3762 | 0.66      |
| P04843                                                                                             | K.DTYIENEK.L        | 1011.4629 | 1 | 2.2698 | 0.2897 | 0.15      |
| P04843                                                                                             | K.GEDEEENNLEVR.E    | 1432.6187 | 2 | 3.5927 | 0.4242 | 1.23      |
| P04843                                                                                             | R.SEDLLDYGPF.R      | 1311.6216 | 2 | 3.8472 | 0.4858 | 0.48      |
| P04843                                                                                             | K.VTAEVVLHLGGGSTR[A | 1657.8999 | 2 | 4.2459 | 0.5332 | 1.78      |
| P04843                                                                                             | K.VTAEVVLHLGGGSTR.A | 1653.8919 | 2 | 4.8691 | 0.6498 | 1.85      |
| P04843                                                                                             | K.GEDEEENNLEVR[E    | 1436.6267 | 2 | 3.0347 | 0.2663 | 0.85      |
| P04843                                                                                             | K.GEDEEENNLEVR.E    | 1432.6187 | 1 | 2.0113 | 0.4464 | 0.96      |
| P04843                                                                                             | R.DISTLNSGK.K       | 934.484   | 1 | 2.1156 | 0.5067 | 0.05      |
| P04843                                                                                             | K.NIEIDSPYEISR.A    | 1435.7063 | 2 | 3.4654 | 0.5549 | 0.56      |
| P04843                                                                                             | R.TVDLSSHLAK.V      | 1070.584  | 2 | 2.5035 | 0.4033 | 0.28      |
| P04843                                                                                             | R.DISTLNSGK.K       | 934.484   | 1 | 2.1385 | 0.507  | 0.12      |
| P04843                                                                                             | K.ALTSEIALLQSR.L    | 1301.7423 | 2 | 3.7516 | 0.274  | 0.38      |
| P04843                                                                                             | K.DPAAEAR.M         | 729.3526  | 2 | 2.3192 | 0.3021 | 0.93      |
| P04843                                                                                             | K.TEGSDLC*DR.V      | 1052.4313 | 2 | 2.5305 | 0.4017 | 0.41      |
| P04843                                                                                             | K.DTYIENEK.L        | 1011.4629 | 1 | 2.2946 | 0.292  | 0.13      |
| P04843                                                                                             | K.TEGSDLC*DR[V      | 1056.4393 | 2 | 3.1494 | 0.387  | 0.41      |
| P04843                                                                                             | R.NVESYTK[L         | 844.4178  | 1 | 2.0079 | 0.3787 | 0.29      |
| P04843                                                                                             | R.DVPAYSQDTFK.V     | 1270.595  | 1 | 2.4027 | 0.2556 | 0.32      |
| P04843                                                                                             | K.LPVALDPGAK[I      | 984.5855  | 1 | 2.3299 | 0.4139 | 0.43      |
| P04843                                                                                             | K.ALTSEIALLQSR.L    | 1301.7423 | 2 | 3.6039 | 0.355  | 0.38      |

| Acc #                                                                                                         | Peptide               | MH+       | z | XC     | DCN    | H/L ratio |
|---------------------------------------------------------------------------------------------------------------|-----------------------|-----------|---|--------|--------|-----------|
| P04843                                                                                                        | K.LPVALDPGAK.I        | 980.5775  | 1 | 2.0505 | 0.4176 | 0.43      |
| P04843                                                                                                        | R.NVESYTK.L           | 840.4098  | 1 | 1.9818 | 0.2973 | 0.29      |
| P04843                                                                                                        | K.LPVALDPGAK.I        | 980.5775  | 1 | 2.1227 | 0.2662 | 0.43      |
| P04843                                                                                                        | K.LPVALDPGAK.I        | 980.5775  | 1 | 2.3554 | 0.4127 | 0.43      |
| P04843                                                                                                        | K.NIEIDSPYEISR.A      | 1435.7063 | 2 | 3.2271 | 0.5658 | 1.05      |
| P04843                                                                                                        | R.SEDLLDYGPF.R        | 1311.6216 | 2 | 3.9745 | 0.4076 | 0.48      |
| P04843                                                                                                        | R.SEDLLDYGPF.R        | 1311.6216 | 2 | 3.1991 | 0.4623 | 0.51      |
| P04843                                                                                                        | R.SEDLLDYGPF.R        | 1311.6216 | 2 | 4.0796 | 0.4632 | 0.51      |
| P04843                                                                                                        | R.DVPAYSQDTFK.V       | 1270.595  | 2 | 2.576  | 0.5878 | 0.32      |
| P04843                                                                                                        | R.DVPAYSQDTFK.V       | 1270.595  | 1 | 2.625  | 0.4871 | 0.32      |
| P04843                                                                                                        | K.LPVALDPGAK.I        | 980.5775  | 1 | 1.938  | 0.2787 | 0.43      |
| <b><i>Dolichyl-P-Man:Man(5)GlcNAc(2)-PP-dolichyl mannosyltransferase (EC 2.4.1.-) (Dol-P-Man)</i></b>         |                       |           |   |        |        |           |
| Q92685                                                                                                        | R.SGSAQAEGLC*K.Q      | 1178.547  | 1 | 2.0287 | 0.4281 | 0.41      |
| Q92685                                                                                                        | R.SGSAQAEGLC*K.Q      | 1178.547  | 2 | 2.927  | 0.3783 | 0.21      |
| Q92685                                                                                                        | R.FLPEALFLHR.A        | 1242.6994 | 2 | 2.3995 | 0.492  | 0.66      |
| Q92685                                                                                                        | R.TGESILSLLR[D        | 1092.639  | 2 | 4.5    | 0.3449 | 0.34      |
| Q92685                                                                                                        | R.TGESILSLLR.D        | 1088.631  | 2 | 2.936  | 0.2122 | 0.34      |
| <b><i>Down-regulated in metastasis protein (Key-1A6 protein) (Novel nucleolar protein 73) (NNP73)</i></b>     |                       |           |   |        |        |           |
| O75691                                                                                                        | K.VLYLLELYCEDKQSKIK.E | 2085.13   | 2 | 2.6055 | 0.0886 | 0.31      |
| O75691                                                                                                        | K.VLYLLELYCEDKQSKIK.E | 2085.13   | 2 | 2.6751 | 0.1311 | 0.34      |
| <b><i>DTTR431 (C-type lectin superfamily 4, member G)</i></b>                                                 |                       |           |   |        |        |           |
| Q6UXB4                                                                                                        | K.QTAALGALK[E         | 876.528   | 1 | 2.103  | 0.0882 | 7.38      |
| <b><i>Dynammin-1-like protein (EC 3.6.5.5) (Dynammin-like protein) (Dnm1p/Vps1p-like protein) (DVL1P)</i></b> |                       |           |   |        |        |           |
| O00429                                                                                                        | R.SQLDINNKK[S         | 1063.5873 | 2 | 2.4773 | 0.2641 | 9.32      |
| O00429                                                                                                        | R.SQLDINNKK[S         | 1063.5873 | 2 | 2.5761 | 0.2725 | 8.45      |
| <b><i>Dynein intermediate chain 2, cytosolic (DH IC-2) (Cytoplasmic dynein intermediate chain 2)</i></b>      |                       |           |   |        |        |           |
| Q13409                                                                                                        | K.EGEIQAGAK[L         | 906.4658  | 1 | 2.076  | 0.1156 | 0.83      |
| <b><i>Dystrophin</i></b>                                                                                      |                       |           |   |        |        |           |
| P11532                                                                                                        | K.QTNLQWIKVSRALPEK.Q  | 1911.0811 | 2 | 2.2503 | 0.1952 | 0.05      |
| <b><i>Elongation factor 2 (EF-2)</i></b>                                                                      |                       |           |   |        |        |           |
| P13639                                                                                                        | K.DLEEDHAC*IPIK.K     | 1439.6835 | 2 | 3.8025 | 0.3842 | 0.12      |
| <b><i>Elongation factor Tu, mitochondrial precursor (EF-Tu) (P43)</i></b>                                     |                       |           |   |        |        |           |
| P49411                                                                                                        | K.YEEIDNAPEER.A       | 1364.5965 | 2 | 2.7578 | 0.293  | 0.58      |
| <b><i>Elongation of very long chain fatty acids protein 1</i></b>                                             |                       |           |   |        |        |           |

| Acc #                                                                                                               | Peptide                    | MH+       | z | XC     | DCN    | H/L ratio |
|---------------------------------------------------------------------------------------------------------------------|----------------------------|-----------|---|--------|--------|-----------|
| Q9BW60                                                                                                              | R.C*DPVDYDYSNSPEALR[M      | 1626.7195 | 2 | 4.8147 | 0.4528 | 29.23     |
| Q9BW60                                                                                                              | R.C*DPVDYDYSNSPEALR[M      | 1626.7195 | 2 | 2.6959 | 0.2312 | 26.36     |
| <b><i>Elongation protein 3 homolog (Hypothetical protein DKFZp761L098)</i></b>                                      |                            |           |   |        |        |           |
| Q9BVF7                                                                                                              | K.FQHQGFGMLLMEEAER.I       | 1922.8888 | 2 | 2.2588 | 0.1908 | 1.13      |
| <b><i>Ephrin type-A receptor 2 precursor (EC 2.7.1.112) (Tyrosine-protein kinase receptor ECK) (Epithelial</i></b>  |                            |           |   |        |        |           |
| P29317                                                                                                              | K.TYVDPHTYEDPNQAVLK.F      | 1989.9552 | 2 | 4.7973 | 0.6248 | 0.35      |
| P29317                                                                                                              | R.VLEDDPEATYTTSGGK.I       | 1682.7756 | 2 | 2.8278 | 0.3903 | 0.05      |
| P29317                                                                                                              | R.VLEDDPEATYTTSGGK.I       | 1682.7756 | 2 | 4.6428 | 0.5454 | 0.10      |
| <b><i>Epithelial protein lost in neoplasm</i></b>                                                                   |                            |           |   |        |        |           |
| Q9UHB6                                                                                                              | K.SEISENTDASGK.I           | 1237.5543 | 2 | 3.8127 | 0.5536 | 0.26      |
| <b><i>Epsin-4 (Epsin-related protein) (EpsinR) (Enthoprotin) (Clathrin interacting protein localized in the</i></b> |                            |           |   |        |        |           |
| Q14677                                                                                                              | K.ASPDQNASTHTPQSSVK.T      | 1754.8304 | 2 | 4.4169 | 0.5829 | 0.45      |
| <b><i>ERGIC-53 protein precursor (ER-Golgi intermediate compartment 53 kDa protein) (Lectin, mannose-</i></b>       |                            |           |   |        |        |           |
| P49257                                                                                                              | K.NSMSETVR.L               | 923.4251  | 1 | 1.9877 | 0.3831 | 0.09      |
| <b><i>ER-Golgi intermediate compartment 32 kDa protein (ERGIC-32)</i></b>                                           |                            |           |   |        |        |           |
| Q969X5                                                                                                              | K.IVPTVYEDK.S              | 1063.567  | 1 | 2.0924 | 0.2103 | 0.30      |
| <b><i>Erythrocyte band 7 integral membrane protein (Stomatin) (Protein 7.2b)</i></b>                                |                            |           |   |        |        |           |
| P27105                                                                                                              | R.VQNATLAVANITNADSATR.L    | 1929.9988 | 2 | 6.5008 | 0.7188 | 0.63      |
| P27105                                                                                                              | R.AMAAEAEASR.E             | 1006.4622 | 1 | 2.4012 | 0.2859 | 0.22      |
| P27105                                                                                                              | R.VQNATLAVANITNADSATR.L    | 1929.9988 | 2 | 6.9561 | 0.7216 | 0.58      |
| P27105                                                                                                              | R.VQNATLAVANITNADSATR[L    | 1934.0068 | 2 | 5.4481 | 0.4908 | 0.58      |
| P27105                                                                                                              | R.VQNATLAVANITNADSATR[L    | 1934.0068 | 2 | 5.3943 | 0.4852 | 0.63      |
| <b><i>Eukaryotic translation initiation factor 3 subunit 8 (eIF3 p110) (eIF3c)</i></b>                              |                            |           |   |        |        |           |
| Q99613                                                                                                              | R.GGVPLVK.E                | 669.4294  | 1 | 1.9433 | 0.1872 | 2.26      |
| <b><i>EVI-5 homolog</i></b>                                                                                         |                            |           |   |        |        |           |
| O60447                                                                                                              | R.ESNQVVQK[E               | 935.4923  | 2 | 2.2476 | 0.0958 | 0.52      |
| <b><i>F-actin capping protein alpha-1 subunit (CapZ alpha-1)</i></b>                                                |                            |           |   |        |        |           |
| P52907                                                                                                              | K.EASDPQPEEADGGLK.S        | 1542.6918 | 2 | 3.6286 | 0.5988 | 0.23      |
| <b><i>Factor for adipocyte differentiation 104 variant (Fragment)</i></b>                                           |                            |           |   |        |        |           |
| Q53EP0                                                                                                              | K.DLRPATDYHVR.V            | 1342.6862 | 1 | 2.1742 | 0.1169 | 0.07      |
| <b><i>Fatty acid-binding protein, epidermal (E-FABP) (Psoriasis-associated fatty acid-binding protein</i></b>       |                            |           |   |        |        |           |
| Q01469                                                                                                              | K.FEETTADGR[K              | 1029.4614 | 2 | 2.5396 | 0.4269 | 1.61      |
| <b><i>F-box/LRR-repeat protein 19 (F-box and leucine-rich repeat protein 19)</i></b>                                |                            |           |   |        |        |           |
| Q6PCT2                                                                                                              | K.VGGDACLLRGSDPGGPGLLPPR.V | 2104.0968 | 2 | 3.3168 | 0.4117 | 0.34      |

| Acc #                                                                                                       | Peptide                    | MH+       | z | XC     | DCN    | H/L ratio |
|-------------------------------------------------------------------------------------------------------------|----------------------------|-----------|---|--------|--------|-----------|
| Q6PCT2                                                                                                      | K.VGGDACLLRGSDPGGPGLLPPR.V | 2104.0968 | 2 | 2.5951 | 0.337  | 0.41      |
| <b><i>Feline leukemia virus subgroup C receptor-related protein 1 (Feline leukemia virus subgroup C</i></b> |                            |           |   |        |        |           |
| Q9Y5Y0                                                                                                      | K.AIPADSPDQEPK[T           | 1372.6722 | 2 | 2.2332 | 0.3266 | 0.48      |
| <b><i>FKSG14 protein (Leucine zipper protein AF5alpha) (SoxLZ/Sox6 leucine zipper binding protein)</i></b>  |                            |           |   |        |        |           |
| Q9BS16                                                                                                      | R.QDLEMVLSTK[E             | 1167.6057 | 1 | 2.3469 | 0.1143 | 25.44     |
| <b><i>FKSG30</i></b>                                                                                        |                            |           |   |        |        |           |
| Q9BYX7                                                                                                      | K.EITALAPSIMK[I            | 1177.6628 | 2 | 2.4268 | 0.3087 | 180.23    |
| <b><i>FLJ00086 protein (Fragment)</i></b>                                                                   |                            |           |   |        |        |           |
| Q9H7J3                                                                                                      | R.GEWCMVGGCGQPQVGAGR.A     | 1791.7724 | 2 | 2.2246 | 0.1144 | 0.18      |
| <b><i>FLJ00144 protein (Fragment)</i></b>                                                                   |                            |           |   |        |        |           |
| Q8TEP9                                                                                                      | R.FFLSSGLIDK.V             | 1126.6143 | 2 | 3.2219 | 0.5339 | 0.08      |
| <b><i>FLJ20625 protein</i></b>                                                                              |                            |           |   |        |        |           |
| Q6IAA8                                                                                                      | R.KLLLDPSPPTK.A            | 1295.7569 | 2 | 2.9839 | 0.4647 | 21.79     |
| <b><i>Flotillin-1</i></b>                                                                                   |                            |           |   |        |        |           |
| O75955                                                                                                      | R.GEAEFAIGAR.A             | 1091.548  | 1 | 2.3361 | 0.4695 | 0.29      |
| O75955                                                                                                      | K.LPQVAEEISGPLTSANK.I      | 1753.9331 | 2 | 5.135  | 0.6429 | 0.29      |
| O75955                                                                                                      | K.LPQVAEEISGPLTSANK.I      | 1753.9331 | 2 | 4.7986 | 0.657  | 0.56      |
| <b><i>Flotillin-2 (Epidermal surface antigen) (ESA)</i></b>                                                 |                            |           |   |        |        |           |
| Q14254                                                                                                      | K.VDEIVVLSGDNSK.V          | 1374.7111 | 2 | 4.4614 | 0.6369 | 1.36      |
| Q14254                                                                                                      | K.IGEAEEAVIEAMGK.A         | 1388.709  | 2 | 3.4972 | 0.5506 | 0.23      |
| Q14254                                                                                                      | K.VDEIVVLSGDNSK.V          | 1374.7111 | 2 | 4.4321 | 0.6474 | 3.35      |
| <b><i>FMI protein</i></b>                                                                                   |                            |           |   |        |        |           |
| Q92735                                                                                                      | R.C*QPLHHEEPAALSER.S       | 1773.8337 | 2 | 2.2356 | 0.1454 | 0.79      |
| <b><i>Forkhead box protein G1C (Forkhead-related protein FKHL3) (HFK3) (Fragment)</i></b>                   |                            |           |   |        |        |           |
| Q14488                                                                                                      | K.LAAFRWCALTSTGLTFMDR[A    | 2164.0809 | 2 | 2.2597 | 0.1582 | 0.49      |
| <b><i>FP2653 (ELSD1897) (MGC3123 protein)</i></b>                                                           |                            |           |   |        |        |           |
| Q71RG4                                                                                                      | K.FLNDTEELAVARPEDTVGALK[S  | 2292.1849 | 2 | 2.4276 | 0.2631 | 0.63      |
| Q71RG4                                                                                                      | K.FLNDTEELAVARPEDTVGALK.S  | 2288.1769 | 2 | 3.9126 | 0.5593 | 0.63      |
| <b><i>Frizzled 6 precursor (Frizzled-6) (Fz-6) (hFz6)</i></b>                                               |                            |           |   |        |        |           |
| O60353                                                                                                      | R.QYHIPCPYQAKAKAR[P        | 1777.9297 | 2 | 2.7091 | 0.1259 | 0.79      |
| O60353                                                                                                      | R.QYHIPCPYQAKAKAR[P        | 1777.9297 | 2 | 2.6112 | 0.1744 | 0.95      |
| <b><i>FYVE, RhoGEF and PH domain containing protein 6 (Zinc finger FYVE domain containing</i></b>           |                            |           |   |        |        |           |
| Q6ZV73                                                                                                      | K.EFDKNIALLDEQCK[K         | 1669.8232 | 2 | 2.5204 | 0.2054 | 0.81      |

| Acc #                                                                                                                 | Peptide                 | MH+       | z | XC     | DCN    | H/L ratio |
|-----------------------------------------------------------------------------------------------------------------------|-------------------------|-----------|---|--------|--------|-----------|
| <b><i>G2/mitotic-specific cyclin-F</i></b>                                                                            |                         |           |   |        |        |           |
| P41002                                                                                                                | R.ASSEIVCQLFQASQAVSK.Q  | 1895.9531 | 2 | 2.2679 | 0.1077 | 0.85      |
| <b><i>Gamma crystallin B (Gamma crystallin 1-2)</i></b>                                                               |                         |           |   |        |        |           |
| P07316                                                                                                                | R.GQMSELTDDC*LSVQDR.F   | 1853.8004 | 2 | 2.5033 | 0.1556 | 0.31      |
| <b><i>Gap junction beta-6 protein (Connexin-30) (Cx30)</i></b>                                                        |                         |           |   |        |        |           |
| O95452                                                                                                                | K.DIEDIK.K              | 732.3774  | 1 | 1.9655 | 0.1352 | 0.09      |
| <b><i>Gene rich cluster, C3f gene</i></b>                                                                             |                         |           |   |        |        |           |
| Q6P1A2                                                                                                                | K.DQNSLSSEQQK.Y         | 1263.5811 | 1 | 2.193  | 0.454  | 0.48      |
| Q6P1A2                                                                                                                | K.DQNSLSSEQQK.Y         | 1267.5891 | 2 | 4.0876 | 0.3047 | 0.65      |
| Q6P1A2                                                                                                                | K.IPNSIIPALK.R          | 1065.6667 | 2 | 3.2621 | 0.2043 | 0.29      |
| <b><i>General receptor for phosphoinositides 1-associated scaffold protein (GRP1-associated scaffold protein)</i></b> |                         |           |   |        |        |           |
| Q7Z6J2                                                                                                                | R.KAELEARLQYLK[.Q       | 1465.8504 | 2 | 2.7592 | 0.1268 | 1.45      |
| Q7Z6J2                                                                                                                | R.KAELEARLQYLK[.Q       | 1465.8504 | 2 | 2.6999 | 0.103  | 2.54      |
| <b><i>Glutamate receptor, ionotropic kainate 1 precursor (Glutamate receptor 5) (GluR-5) (GluR5)</i></b>              |                         |           |   |        |        |           |
| P39086                                                                                                                | K.NNDIEQAFC*FFYGLQC*K.Q | 2153.9419 | 2 | 2.3114 | 0.115  | 0.41      |
| <b><i>Glutamate--cysteine ligase catalytic subunit (EC 6.3.2.2) (Gamma-glutamylcysteine synthetase)</i></b>           |                         |           |   |        |        |           |
| P48506                                                                                                                | R.EERGLEPLK.N           | 1070.584  | 2 | 2.2392 | 0.1712 | 0.57      |
| <b><i>Glutathione synthetase (EC 6.3.2.3) (Glutathione synthase) (GSH synthetase) (GSH-S)</i></b>                     |                         |           |   |        |        |           |
| P48637                                                                                                                | K.EAGKILSNPDK.G         | 1257.6797 | 2 | 2.2959 | 0.2139 | 0.04      |
| P48637                                                                                                                | K.EAGKILSNPDK.G         | 1257.6797 | 2 | 2.3607 | 0.157  | 0.08      |
| <b><i>Glyceraldehyde 3-phosphate dehydrogenase (GAPDH)</i></b>                                                        |                         |           |   |        |        |           |
| Q5JR58                                                                                                                | K.LVITGNLITIFQER.D      | 1616.937  | 2 | 2.2916 | 0.3599 | 0.17      |
| <b><i>Glyceraldehyde-3-phosphate dehydrogenase, liver (EC 1.2.1.12) (GAPDH)</i></b>                                   |                         |           |   |        |        |           |
| P04406                                                                                                                | R.GALQNIIPASTGAAK[.A    | 1415.7984 | 2 | 3.3202 | 0.2672 | 2.09      |
| <b><i>Glycogen phosphorylase, liver form (EC 2.4.1.1)</i></b>                                                         |                         |           |   |        |        |           |
| P06737                                                                                                                | R.YEYGIFNQKIR[.D        | 1434.7507 | 2 | 2.6672 | 0.0879 | 0.42      |
| <b><i>Glycolipid transfer protein (GLTP)</i></b>                                                                      |                         |           |   |        |        |           |
| Q9NZD2                                                                                                                | R.TLQNIILEVEK.E         | 1186.6678 | 2 | 2.3418 | 0.1181 | 0.48      |
| <b><i>Guanine nucleotide-binding protein G(I)/G(S)/G(O) gamma-12 subunit</i></b>                                      |                         |           |   |        |        |           |
| Q9UBI6                                                                                                                | R.SDPLLIPIPTSENPFK.D    | 1727.9214 | 2 | 3.5177 | 0.5581 | 0.24      |
| Q9UBI6                                                                                                                | R.SDPLLIPIPTSENPFK.D    | 1727.9214 | 2 | 3.255  | 0.4462 | 0.19      |
| Q9UBI6                                                                                                                | K.TASTNNIAQAR.R         | 1146.5862 | 1 | 1.9232 | 0.3409 | 0.09      |
| <b><i>Guanine nucleotide-binding protein G(I)/G(S)/G(T) beta subunit 2 (Transducin beta chain 2) (G</i></b>           |                         |           |   |        |        |           |

| Acc #                                                                                                            | Peptide                    | MH+       | z | XC     | DCN    | H/L ratio |
|------------------------------------------------------------------------------------------------------------------|----------------------------|-----------|---|--------|--------|-----------|
| P62879                                                                                                           | K.AC*GDSTLTQITAGLDPVGR.I   | 1931.9491 | 2 | 4.9543 | 0.5476 | 0.80      |
| <b><i>Guanine nucleotide-binding protein G(k), alpha subunit (G(i) alpha-3)</i></b>                              |                            |           |   |        |        |           |
| P08754                                                                                                           | R.ISQSNYIPTQQDVLR.T        | 1761.913  | 2 | 4.5407 | 0.4215 | 1.04      |
| P08754                                                                                                           | R.EYQLNDSASYLNDLDR.I       | 2078.9302 | 2 | 5.2606 | 0.5592 | 0.56      |
| <b><i>Guanine nucleotide-binding protein, alpha-14 subunit (G-protein alpha subunit 14)</i></b>                  |                            |           |   |        |        |           |
| O95837                                                                                                           | R.EYQLSDSAKYLTDIR.I        | 2079.9869 | 2 | 2.5646 | 0.1287 | 0.16      |
| <b><i>HCV F-transactivated protein 1</i></b>                                                                     |                            |           |   |        |        |           |
| Q6J203                                                                                                           | R.QNFDVRPQSGANGLPK.H       | 1727.8824 | 2 | 2.6047 | 0.4237 | 0.44      |
| <b><i>Heat shock cognate 71 kDa protein (Heat shock 70 kDa protein 8)</i></b>                                    |                            |           |   |        |        |           |
| P11142                                                                                                           | K.SFYPEEVSSMVLTK.M         | 1616.7876 | 2 | 4.0742 | 0.5523 | 0.15      |
| P11142                                                                                                           | K.SFYPEEVSSMVLTK.M         | 1616.7876 | 2 | 3.4391 | 0.4761 | 0.15      |
| P11142                                                                                                           | R.FDDAVVQSDMK.H            | 1254.5671 | 2 | 3.9909 | 0.4977 | 0.09      |
| P11142                                                                                                           | K.DAGTIAGLNVLRL.I          | 1203.6823 | 2 | 3.5952 | 0.4891 | 0.83      |
| P11142                                                                                                           | K.DAGTIAGLNVLRL.I          | 1199.6743 | 2 | 2.3103 | 0.1894 | 0.21      |
| P11142                                                                                                           | K.NQVAMNPTNTVFDAK.R        | 1649.7952 | 2 | 4.6005 | 0.5809 | 0.61      |
| P11142                                                                                                           | K.NQVAMNPTNTVFDAK.R        | 1649.7952 | 2 | 3.8641 | 0.6048 | 1.91      |
| P11142                                                                                                           | K.DAGTIAGLNVLRL.I          | 1199.6743 | 2 | 3.7006 | 0.3522 | 0.83      |
| P11142                                                                                                           | K.EIAEAYLGK.T              | 993.5251  | 1 | 2.1559 | 0.3759 | 0.46      |
| <b><i>Heat-shock protein beta-1 (HspB1) (Heat shock 27 kDa protein) (HSP 27) (Stress-responsive protein)</i></b> |                            |           |   |        |        |           |
| P04792                                                                                                           | K.DGVVEITGK.H              | 917.4938  | 1 | 2.3192 | 0.4178 | 1.12      |
| P04792                                                                                                           | K.DGVVEITGK[H.H            | 921.5018  | 1 | 2.2461 | 0.3152 | 1.12      |
| P04792                                                                                                           | K.LATQSNEITIPVTFESR.A      | 1905.9916 | 2 | 4.0525 | 0.5359 | 0.38      |
| <b><i>HECT domain and RCC1-like domain protein 3</i></b>                                                         |                            |           |   |        |        |           |
| Q15034                                                                                                           | R.ESPCHVKLLRTQK[V          | 1542.8552 | 2 | 2.3491 | 0.2138 | 2.39      |
| <b><i>Hermansky-Pudlak syndrome 3 protein</i></b>                                                                |                            |           |   |        |        |           |
| Q969F9                                                                                                           | K.LEPDRFC*GGGRDALFVAAGCK[V | 2243.0827 | 2 | 2.557  | 0.1051 | 1.38      |
| <b><i>Histone H1.5 (Histone H1a)</i></b>                                                                         |                            |           |   |        |        |           |
| P16401                                                                                                           | K.ATGPPVSELITK.A           | 1212.6834 | 2 | 2.4001 | 0.2934 | 0.25      |
| P16401                                                                                                           | K.ATGPPVSELITK.A           | 1212.6834 | 2 | 2.896  | 0.5008 | 0.25      |
| <b><i>Histone H4</i></b>                                                                                         |                            |           |   |        |        |           |
| P62805                                                                                                           | R.DAVTYTEHAK.R             | 1134.5426 | 2 | 3.1649 | 0.4115 | 0.52      |
| P62805                                                                                                           | R.ISGLIYEETR.G             | 1180.6208 | 1 | 2.7114 | 0.1047 | 0.26      |
| P62805                                                                                                           | K.TVTAMDVVYALK.R           | 1310.7025 | 2 | 3.694  | 0.5648 | 0.44      |
| P62805                                                                                                           | K.VFLENVIR.D               | 989.5778  | 1 | 2.0187 | 0.1861 | 0.41      |

| Acc #  | Peptide          | MH+       | z | XC     | DCN    | H/L ratio |
|--------|------------------|-----------|---|--------|--------|-----------|
| P62805 | R.ISGLIYEETR.G   | 1180.6208 | 2 | 3.8161 | 0.5032 | 0.23      |
| P62805 | R.DNIQGITK[P     | 892.4865  | 1 | 2.1517 | 0.3084 | 0.21      |
| P62805 | R.ISGLIYEETR.G   | 1180.6208 | 1 | 2.6018 | 0.3615 | 0.33      |
| P62805 | R.ISGLIYEETR.G   | 1180.6208 | 2 | 3.9156 | 0.4682 | 0.23      |
| P62805 | K.VFLENVIR.D     | 989.5778  | 1 | 2.1958 | 0.0977 | 0.42      |
| P62805 | R.ISGLIYEETR.G   | 1180.6208 | 1 | 2.531  | 0.3404 | 0.24      |
| P62805 | K.VFLENVIR.D     | 989.5778  | 1 | 2.0674 | 0.1016 | 0.72      |
| P62805 | K.VFLENVIR[D     | 993.5858  | 2 | 3.115  | 0.3665 | 0.76      |
| P62805 | R.ISGLIYEETR.G   | 1180.6208 | 1 | 2.5184 | 0.3679 | 0.26      |
| P62805 | R.DNIQGITKPAIR.R | 1325.7536 | 2 | 3.747  | 0.2322 | 0.41      |
| P62805 | R.DNIQGITKPAIR[R | 1329.7616 | 2 | 3.9041 | 0.4015 | 0.41      |
| P62805 | K.VFLENVIR[D     | 993.5858  | 1 | 1.9091 | 0.1283 | 0.41      |
| P62805 | K.VFLENVIR.D     | 989.5778  | 2 | 2.3443 | 0.3686 | 0.98      |
| P62805 | K.VFLENVIR[D     | 993.5858  | 2 | 3.1449 | 0.3968 | 0.98      |
| P62805 | R.ISGLIYEETR.G   | 1180.6208 | 2 | 3.686  | 0.4716 | 0.27      |
| P62805 | R.DNIQGITK[P     | 892.4865  | 1 | 1.9591 | 0.3014 | 0.18      |
| P62805 | K.VFLENVIR.D     | 989.5778  | 2 | 2.5183 | 0.3155 | 0.76      |
| P62805 | K.VFLENVIR[D     | 993.5858  | 1 | 2.0548 | 0.2068 | 0.42      |
| P62805 | R.DNIQGITKPAIR.R | 1325.7536 | 2 | 3.2434 | 0.2333 | 0.36      |

***Histone-lysine N-methyltransferase, H3 lysine-36 and H4 lysine-20 specific (EC 2.1.1.43) (H3-K36-***

|        |                          |          |   |        |        |      |
|--------|--------------------------|----------|---|--------|--------|------|
| Q96L73 | K.QKPLISNSHTDHLMGCS*TK[S | 2071.019 | 2 | 2.4669 | 0.3756 | 0.33 |
|--------|--------------------------|----------|---|--------|--------|------|

***Histone-lysine N-methyltransferase, H3 lysine-9 specific 4 (EC 2.1.1.43) (Histone H3-K9***

|        |                    |           |   |        |        |      |
|--------|--------------------|-----------|---|--------|--------|------|
| Q15047 | R.MEAEKASTSGLGIK[D | 1425.7385 | 2 | 2.3843 | 0.2471 | 3.21 |
|--------|--------------------|-----------|---|--------|--------|------|

***HIV GAG protein***

|             |                      |           |   |        |        |       |
|-------------|----------------------|-----------|---|--------|--------|-------|
| GAG_Protein | R.FAVNPGLLETSEGC*R.Q | 1649.7952 | 2 | 3.5408 | 0.478  | 4.92  |
| GAG_Protein | R.FGEETTTPSQK[Q      | 1228.5823 | 1 | 2.4639 | 0.3639 | 19.06 |
| GAG_Protein | K.ETINEEAAEWDR[L     | 1466.6525 | 2 | 3.625  | 0.4912 | 3.48  |
| GAG_Protein | K.ETINEEAAEWDR.L     | 1462.6445 | 2 | 2.9195 | 0.4888 | 3.48  |
| GAG_Protein | R.FGEETTTPSQK[Q      | 1228.5823 | 2 | 3.733  | 0.3525 | 5.59  |
| GAG_Protein | R.WIILGLNK[I         | 960.6008  | 1 | 2.1498 | 0.4029 | 4.19  |
| GAG_Protein | K.ELYPLASLR[S        | 1065.607  | 1 | 2.0811 | 0.3395 | 1.20  |
| GAG_Protein | R.FGEETTTPSQK.Q      | 1224.5743 | 2 | 3.7155 | 0.5265 | 5.59  |
| GAG_Protein | R.AEQASQEVK[N        | 993.4978  | 2 | 2.7017 | 0.2092 | 21.13 |
| GAG_Protein | R.MYSPTSILDIR[Q      | 1299.6744 | 2 | 3.9451 | 0.5298 | 5.53  |
| GAG_Protein | R.AEQASQEVK.N        | 989.4898  | 1 | 2.3137 | 0.3616 | 2.28  |



| Acc #       | Peptide                | MH+       | z | XC     | DCN    | H/L ratio |
|-------------|------------------------|-----------|---|--------|--------|-----------|
| GAG_Protein | K.QEPIDKELYPLASLR[S    | 1775.9669 | 2 | 3.4511 | 0.4602 | 10.18     |
| GAG_Protein | R.FGEETTTPSQK[Q        | 1228.5823 | 2 | 3.426  | 0.3257 | 6.29      |
| GAG_Protein | R.FGEETTTPSQK[Q        | 1228.5823 | 1 | 2.2979 | 0.3982 | 19.06     |
| GAG_Protein | R.FGEETTTPSQK[Q        | 1228.5823 | 2 | 3.6589 | 0.3108 | 4.92      |
| GAG_Protein | R.FAVNPGLLETSEGC*R[Q   | 1653.8032 | 2 | 4.4563 | 0.5638 | 4.92      |
| GAG_Protein | R.FGEETTTPSQK.Q        | 1224.5743 | 2 | 3.7687 | 0.5458 | 5.77      |
| GAG_Protein | R.FGEETTTPSQK[Q        | 1228.5823 | 1 | 2.4538 | 0.4499 | 12.48     |
| GAG_Protein | R.QILGQLQPSLQTGSEELR.S | 1997.0662 | 2 | 5.7279 | 0.6476 | 2.18      |
| GAG_Protein | K.ELYPLASLR[S          | 1065.607  | 1 | 2.1783 | 0.3039 | 2.00      |
| GAG_Protein | R.FGEETTTPSQK[Q        | 1228.5823 | 2 | 3.7172 | 0.3453 | 5.77      |
| GAG_Protein | R.FGEETTTPSQK[Q        | 1228.5823 | 1 | 2.5495 | 0.4146 | 12.70     |
| GAG_Protein | R.FGEETTTPSQK[Q        | 1228.5823 | 1 | 2.2273 | 0.4178 | 38.98     |

### ***HLA1-3TM***

|        |                        |          |   |        |        |      |
|--------|------------------------|----------|---|--------|--------|------|
| Q8MH63 | K.RADGAAPAGEGEGVTLQR.N | 1754.878 | 2 | 2.6399 | 0.4779 | 0.34 |
| Q8MH63 | K.RADGAAPAGEGEGVTLQR.N | 1754.878 | 2 | 3.0186 | 0.445  | 0.51 |

### ***Homeobox protein Cux-2 (Cut-like 2)***

|        |                 |           |   |       |        |      |
|--------|-----------------|-----------|---|-------|--------|------|
| O14529 | R.NPELLSPKEQR[E | 1314.7143 | 2 | 2.256 | 0.1054 | 6.43 |
|--------|-----------------|-----------|---|-------|--------|------|

### ***Homocysteine-responsive endoplasmic reticulum-resident ubiquitin-like domain member 1 protein***

|        |                   |           |   |        |       |      |
|--------|-------------------|-----------|---|--------|-------|------|
| Q15011 | K.VAESTEEPAGSNR.G | 1346.6183 | 2 | 4.1079 | 0.504 | 0.41 |
|--------|-------------------|-----------|---|--------|-------|------|

### ***Hormonally up-regulated neu tumor-associated kinase (EC 2.7.1.37) (Serine/threonine-protein***

|        |                      |           |   |        |        |      |
|--------|----------------------|-----------|---|--------|--------|------|
| P57058 | K.LGYKNSDVINTVLSNR[A | 1796.9632 | 2 | 2.6354 | 0.0978 | 0.60 |
|--------|----------------------|-----------|---|--------|--------|------|

### ***Hornerin***

|        |                        |           |   |        |        |      |
|--------|------------------------|-----------|---|--------|--------|------|
| Q86YZ3 | R.GSGSGQSPSSGQHGTFGR[S | 1751.7823 | 2 | 3.8438 | 0.5435 | 3.58 |
|--------|------------------------|-----------|---|--------|--------|------|

### ***HSPC039 protein (Hypothetical transmembrane protein) (Immediate early response 3 interacting***

|        |                          |          |   |        |       |      |
|--------|--------------------------|----------|---|--------|-------|------|
| Q9Y5U9 | K.NIGWGTDQGIGGFGEPEGIK.S | 2031.977 | 2 | 5.2517 | 0.582 | 0.50 |
|--------|--------------------------|----------|---|--------|-------|------|

### ***HSPC049***

|        |                             |           |   |        |        |      |
|--------|-----------------------------|-----------|---|--------|--------|------|
| Q9NZY6 | R.LGDSELAMVC*SQRNASLSQSLR.V | 2422.1813 | 2 | 2.7365 | 0.2639 | 0.04 |
|--------|-----------------------------|-----------|---|--------|--------|------|

### ***HSPC121***

|        |                    |           |   |        |        |      |
|--------|--------------------|-----------|---|--------|--------|------|
| Q9P035 | R.LESEGSPETLTNLR.K | 1545.7755 | 2 | 3.8319 | 0.5617 | 0.37 |
| Q9P035 | R.QVNITVQK.K       | 929.5415  | 1 | 1.9078 | 0.1968 | 0.28 |
| Q9P035 | R.QVNITVQK[.K      | 933.5495  | 1 | 2.2021 | 0.223  | 0.28 |
| Q9P035 | R.QVNITVQK.K       | 929.5415  | 1 | 2.4471 | 0.2265 | 0.30 |
| Q9P035 | R.LESEGSPETLTNLR.K | 1545.7755 | 2 | 4.1309 | 0.5724 | 0.34 |

### ***Hydroxyacid oxidase 1 (EC 1.1.3.15) (HAOX1) (Glycolate oxidase) (GOX)***

| Acc #                                                             | Peptide                         | MH+       | z | XC     | DCN    | H/L ratio |
|-------------------------------------------------------------------|---------------------------------|-----------|---|--------|--------|-----------|
| Q9UJM8                                                            | R.NRFKLPPQLR.M                  | 1268.7586 | 2 | 2.5176 | 0.161  | 0.05      |
| <b><i>Hypothetical protein</i></b>                                |                                 |           |   |        |        |           |
| Q32M75                                                            | K.C*FSKSSALNKHGEIHAR[E          | 1945.9792 | 2 | 2.3827 | 0.1997 | 0.29      |
| Q3MJA4                                                            | K.WFMKQNTTEESTIGR[K             | 1730.8297 | 2 | 2.2072 | 0.0807 | 0.12      |
| Q4G0N0                                                            | R.EVDDSSAQK.G                   | 978.4374  | 1 | 2.0976 | 0.1636 | 0.24      |
| Q49AJ3                                                            | R.FTRSDELQRHSR.T                | 1531.7724 | 2 | 2.5588 | 0.1587 | 4.58      |
| Q3B7X4                                                            | K.GDTPASATAGDTLSVPAPAVQPEESLK.T | 2609.2941 | 3 | 4.1185 | 0.5496 | 0.51      |
| Q4G0N0                                                            | R.EVDDSSAQK.G                   | 978.4374  | 1 | 1.9685 | 0.1426 | 0.15      |
| Q4G0N0                                                            | R.EVDDSSAQK.G                   | 978.4374  | 1 | 1.9856 | 0.1284 | 1.43      |
| Q6PQ33                                                            | R.REISNVSREAR.A                 | 1316.7029 | 2 | 2.4854 | 0.0975 | 0.53      |
| Q3B7X4                                                            | K.GDTPASATAGDTLSVPAPAVQPEESLK.T | 2609.2941 | 2 | 4.4152 | 0.4428 | 0.35      |
| Q3KRF4                                                            | R.LFLVAGNFFRIQK[L               | 1556.9078 | 2 | 2.8268 | 0.1986 | 0.50      |
| <b><i>Hypothetical protein (Novel protein)</i></b>                |                                 |           |   |        |        |           |
| Q8Nfq8                                                            | R.LLAPEAGSHPQQTQK.L             | 1604.8391 | 2 | 3.7631 | 0.5454 | 1.24      |
| <b><i>Hypothetical protein C14orf39</i></b>                       |                                 |           |   |        |        |           |
| Q8N1H7                                                            | K.MNETIFMKFR[V                  | 1320.657  | 2 | 2.3474 | 0.1055 | 0.53      |
| <b><i>Hypothetical protein DKFZp313B047</i></b>                   |                                 |           |   |        |        |           |
| Q5H9S5                                                            | K.EDVDAAVK.Q                    | 846.4203  | 1 | 2.129  | 0.1948 | 0.11      |
| <b><i>Hypothetical protein DKFZp434C011 (RACGAP1 protein)</i></b> |                                 |           |   |        |        |           |
| Q9H0H5                                                            | K.DFEDFR.K                      | 828.3523  | 1 | 2.1049 | 0.17   | 0.40      |
| <b><i>Hypothetical protein DKFZP434J0113</i></b>                  |                                 |           |   |        |        |           |
| Q8IYM0                                                            | R.GIESLTALC*STLIEGQKKR.S        | 2104.1431 | 2 | 2.2579 | 0.1381 | 0.28      |
| Q8IYM0                                                            | K.RGIESLTALCSTLIEGQKK[R         | 2051.1296 | 2 | 2.5164 | 0.2454 | 0.42      |
| <b><i>Hypothetical protein DKFZp434P0216 (Fragment)</i></b>       |                                 |           |   |        |        |           |
| Q8NDA2                                                            | R.DLRVLALLPC*EASGSPK.P          | 1825.984  | 2 | 2.3639 | 0.1384 | 1.30      |
| <b><i>Hypothetical protein DKFZp686C0394</i></b>                  |                                 |           |   |        |        |           |
| Q5HY96                                                            | K.DIILTVK.E                     | 801.508   | 1 | 2.5469 | 0.1661 | 0.06      |
| <b><i>Hypothetical protein DKFZp686J07132</i></b>                 |                                 |           |   |        |        |           |
| Q6MZH2                                                            | R.FPSSELK[N                     | 811.4327  | 1 | 2.2037 | 0.1042 | 0.05      |
| <b><i>Hypothetical protein DKFZp686O22167</i></b>                 |                                 |           |   |        |        |           |
| Q68DQ6                                                            | R.FDNPAAVSPTPTR.Q               | 1372.6856 | 2 | 3.3217 | 0.5012 | 0.28      |
| <b><i>Hypothetical protein DKFZp781B2386</i></b>                  |                                 |           |   |        |        |           |
| Q6AHZ3                                                            | K.ISEIQLEPNFPK[K                | 1532.8086 | 1 | 2.2904 | 0.0842 | 32.08     |
| <b><i>Hypothetical protein DKFZp781D1175</i></b>                  |                                 |           |   |        |        |           |

| Acc #                                                                                                  | Peptide                 | MH+       | z | XC     | DCN    | H/L ratio |
|--------------------------------------------------------------------------------------------------------|-------------------------|-----------|---|--------|--------|-----------|
| Q5H9U9                                                                                                 | K.IMEEKCISEKQADK.C      | 1651.803  | 2 | 2.4299 | 0.1438 | 0.13      |
| <b><i>Hypothetical protein DKFZp781H1112</i></b>                                                       |                         |           |   |        |        |           |
| Q68DK2                                                                                                 | R.CGQDINPQR.V           | 1030.4735 | 1 | 2.0181 | 0.0906 | 0.45      |
| <b><i>Hypothetical protein DKFZp781O2147</i></b>                                                       |                         |           |   |        |        |           |
| Q6AHZ1                                                                                                 | K.NEIVDR.S              | 745.3839  | 1 | 1.9275 | 0.1445 | 0.08      |
| <b><i>Hypothetical protein FAM71B</i></b>                                                              |                         |           |   |        |        |           |
| Q8TC56                                                                                                 | K.MVEKQNEAKVEK.A        | 1545.8305 | 2 | 2.334  | 0.1597 | 0.41      |
| <b><i>Hypothetical protein FLJ10846</i></b>                                                            |                         |           |   |        |        |           |
| Q9NVA4                                                                                                 | R.DDISEQVR.H            | 961.4585  | 1 | 2.0614 | 0.3245 | 0.24      |
| <b><i>Hypothetical protein FLJ13213</i></b>                                                            |                         |           |   |        |        |           |
| Q9H8U9                                                                                                 | R.QQNRFNDFDHRER.G       | 1761.8164 | 2 | 2.5535 | 0.1096 | 0.57      |
| <b><i>Hypothetical protein FLJ14938 (Hypothetical protein NT2RP2003902) (GK001 protein)</i></b>        |                         |           |   |        |        |           |
| Q96A33                                                                                                 | R.ELLESNFTLVGDDGTNK.E   | 1851.8971 | 2 | 4.5095 | 0.6331 | 0.29      |
| Q96A33                                                                                                 | K.RQDLLNVLAR.M          | 1197.7062 | 2 | 2.856  | 0.3409 | 0.26      |
| <b><i>Hypothetical protein FLJ16464</i></b>                                                            |                         |           |   |        |        |           |
| Q6ZN37                                                                                                 | R.QLNEVENNIK.K          | 1328.7169 | 1 | 3.0441 | 0.1474 | 0.13      |
| <b><i>Hypothetical protein FLJ16617</i></b>                                                            |                         |           |   |        |        |           |
| Q6ZMX2                                                                                                 | K.DLWKLMLALNKIK.I       | 1589.9578 | 2 | 2.9556 | 0.1396 | 9.13      |
| <b><i>Hypothetical protein FLJ20261</i></b>                                                            |                         |           |   |        |        |           |
| Q9NXG7                                                                                                 | R.KVLDDLTMTTR.S         | 1191.6402 | 2 | 2.5286 | 0.0851 | 0.43      |
| <b><i>Hypothetical protein FLJ20422 (AVLG582)</i></b>                                                  |                         |           |   |        |        |           |
| Q9NX61                                                                                                 | R.DFLHQPPFGETR.F        | 1443.7015 | 2 | 2.5237 | 0.3098 | 1.01      |
| <b><i>Hypothetical protein FLJ20455 (TPA018) (Ovarian carcinoma immunoreactive antigen) (OCIA)</i></b> |                         |           |   |        |        |           |
| Q9NX40                                                                                                 | R.SVPLAATSMMLITQGLISK.G | 1830.0405 | 2 | 2.9094 | 0.4803 | 1.14      |
| Q9NX40                                                                                                 | K.NITYEELR.N            | 1037.5262 | 1 | 2.3444 | 0.1329 | 0.76      |
| Q9NX40                                                                                                 | R.SVPLAATSMMLITQGLISK.G | 1834.0485 | 2 | 2.2559 | 0.2798 | 1.14      |
| Q9NX40                                                                                                 | K.LENSPLGEALR.S         | 1198.6426 | 2 | 3.4592 | 0.4008 | 0.45      |
| <b><i>Hypothetical protein FLJ23658</i></b>                                                            |                         |           |   |        |        |           |
| Q8TEC2                                                                                                 | R.PGC*C*VLLHSFTQLPGRR.R | 1998.016  | 2 | 2.6916 | 0.1712 | 1.90      |
| <b><i>Hypothetical protein FLJ31346</i></b>                                                            |                         |           |   |        |        |           |
| Q96N66                                                                                                 | K.LVSLASEVQDLHLAQR.K    | 1778.9759 | 2 | 4.7227 | 0.5039 | 0.27      |
| <b><i>Hypothetical protein FLJ31359</i></b>                                                            |                         |           |   |        |        |           |
| Q96N64                                                                                                 | K.VFSKNVSKCVTPDGR.T     | 1640.8556 | 2 | 2.2124 | 0.1784 | 5.21      |

| Acc #                                                                        | Peptide                    | MH+       | z | XC     | DCN    | H/L ratio |
|------------------------------------------------------------------------------|----------------------------|-----------|---|--------|--------|-----------|
| <b><i>Hypothetical protein FLJ32363</i></b>                                  |                            |           |   |        |        |           |
| Q96MH7                                                                       | K.ENEFHCQIMK.S             | 1278.5606 | 2 | 2.2819 | 0.1562 | 0.14      |
| <b><i>Hypothetical protein FLJ32786</i></b>                                  |                            |           |   |        |        |           |
| Q96M69                                                                       | K.IKVEEKVSAVNK.Y           | 1343.7893 | 2 | 3.0436 | 0.085  | 0.19      |
| <b><i>Hypothetical protein FLJ37549</i></b>                                  |                            |           |   |        |        |           |
| Q8N1U5                                                                       | R.NPMNVMNVRRLVFFHR.-       | 2093.1371 | 2 | 2.7983 | 0.1387 | 0.36      |
| <b><i>Hypothetical protein FLJ39430</i></b>                                  |                            |           |   |        |        |           |
| Q8N8I4                                                                       | K.HLREEEEEGEK[I.H          | 1388.6419 | 2 | 2.7983 | 0.132  | 0.23      |
| <b><i>Hypothetical protein FLJ41103</i></b>                                  |                            |           |   |        |        |           |
| Q6ZWG9                                                                       | R.TEAGGEGEPGRGTVVPGAALR[V. | 1985.0177 | 2 | 2.2981 | 0.232  | 10.50     |
| <b><i>Hypothetical protein FLJ42583</i></b>                                  |                            |           |   |        |        |           |
| Q6ZVH2                                                                       | R.PGVGAHACNPSTLGGRGGR[I.   | 1767.8798 | 2 | 2.3894 | 0.1413 | 0.36      |
| <b><i>Hypothetical protein FLJ43035</i></b>                                  |                            |           |   |        |        |           |
| Q6ZV38                                                                       | -.MSAMGSVRPVAGQHSCLR[A.    | 1924.9723 | 2 | 3.0002 | 0.0914 | 0.79      |
| <b><i>Hypothetical protein FLJ44477</i></b>                                  |                            |           |   |        |        |           |
| Q6ZTN4                                                                       | R.GGTRGRHAAAGAGETTEK[E.    | 1730.8659 | 2 | 2.3437 | 0.0897 | 7.73      |
| <b><i>Hypothetical protein FLJ44884</i></b>                                  |                            |           |   |        |        |           |
| Q6ZT81                                                                       | R.WGLWDFIRSWRGSNIK[K.      | 2024.0996 | 2 | 2.2998 | 0.1283 | 9.16      |
| <b><i>Hypothetical protein FLJ45221</i></b>                                  |                            |           |   |        |        |           |
| Q6ZST6                                                                       | R.SESRALAWEGTWRR.I         | 1704.8565 | 2 | 2.7359 | 0.3526 | 0.20      |
| <b><i>Hypothetical protein FLJ46180</i></b>                                  |                            |           |   |        |        |           |
| Q6ZRQ5                                                                       | K.NLDIGVLAEKFSACFR.E       | 1782.9207 | 2 | 2.4103 | 0.0849 | 0.15      |
| <b><i>Hypothetical protein FLJ46844</i></b>                                  |                            |           |   |        |        |           |
| Q6ZQW6                                                                       | R.MQGPSLPCLGTGPTLWPHR.C    | 2149.0681 | 2 | 2.3063 | 0.2458 | 0.54      |
| <b><i>Hypothetical protein FP14381</i></b>                                   |                            |           |   |        |        |           |
| Q71M32                                                                       | R.PLPHCFCHKVNALVR[G.       | 1737.917  | 2 | 2.6539 | 0.1859 | 0.30      |
| <b><i>Hypothetical protein gene +108</i></b>                                 |                            |           |   |        |        |           |
| Q96S30                                                                       | R.LGEGGPDSQAIR.D           | 1314.6284 | 2 | 4.023  | 0.5884 | 0.31      |
| <b><i>Hypothetical protein KIAA1426</i></b>                                  |                            |           |   |        |        |           |
| Q96RY5                                                                       | R.PTCVQAVEGMSRMIVELHR.K    | 2156.0773 | 2 | 2.2651 | 0.1473 | 0.17      |
| <b><i>Hypothetical protein LOC116238</i></b>                                 |                            |           |   |        |        |           |
| Q96CP7                                                                       | R.LPLPVHVR.A               | 930.5883  | 2 | 2.3374 | 0.3308 | 6.23      |
| <b><i>Hypothetical protein LOC133957 (Hypothetical protein FLJ25701)</i></b> |                            |           |   |        |        |           |

| Acc #                                                                                                               | Peptide                  | MH+       | z | XC     | DCN    | H/L ratio |
|---------------------------------------------------------------------------------------------------------------------|--------------------------|-----------|---|--------|--------|-----------|
| Q96BQ5                                                                                                              | R.TAAFQQDLEAK.Y          | 1221.611  | 2 | 2.2056 | 0.1616 | 0.35      |
| <b><i>Hypothetical protein MGC2731</i></b>                                                                          |                          |           |   |        |        |           |
| Q9BQ15                                                                                                              | K.NLNLIFIVLETGR.V        | 1501.8737 | 2 | 2.873  | 0.331  | 0.24      |
| Q9BQ15                                                                                                              | K.NLNLIFIVLETGR.V        | 1501.8737 | 2 | 2.7548 | 0.3385 | 0.34      |
| Q9BQ15                                                                                                              | K.NLNLIFIVLETGR.V        | 1501.8737 | 2 | 2.5349 | 0.2798 | 0.42      |
| <b><i>Hypothetical protein MGC33365</i></b>                                                                         |                          |           |   |        |        |           |
| Q8NDZ4                                                                                                              | R.FLQLNKCPACFGTWC*R.R    | 2030.9398 | 2 | 2.3693 | 0.1635 | 0.65      |
| <b><i>Hypothetical protein MGC34713</i></b>                                                                         |                          |           |   |        |        |           |
| Q8IV33                                                                                                              | K.EDFNTLCEILAPSSMVK.F    | 1896.9082 | 2 | 2.2604 | 0.1692 | 0.12      |
| <b><i>Hypothetical protein PRO1855</i></b>                                                                          |                          |           |   |        |        |           |
| Q96AG4                                                                                                              | K.LTTLPSPDFC*GLTHLVK.L   | 1801.9517 | 2 | 3.5702 | 0.4499 | 0.39      |
| Q96AG4                                                                                                              | K.ATILDLSK*NK.L          | 1134.5823 | 2 | 3.2466 | 0.4923 | 0.13      |
| Q96AG4                                                                                                              | K.DNPLDPVLAK.V           | 1081.5888 | 1 | 2.7102 | 0.4805 | 0.15      |
| Q96AG4                                                                                                              | K.DNPLDPVLAK.V           | 1081.5888 | 2 | 2.2248 | 0.4103 | 0.46      |
| Q96AG4                                                                                                              | K.ATILDLSK*NK.L          | 1134.5823 | 1 | 2.0684 | 0.3158 | 0.19      |
| Q96AG4                                                                                                              | K.LTTLPSPDFC*GLTHLVK.L   | 1801.9517 | 2 | 3.5139 | 0.5529 | 0.39      |
| Q96AG4                                                                                                              | K.DNPLDPVLAK.V           | 1081.5888 | 1 | 2.1096 | 0.2368 | 0.15      |
| <b><i>IGHG4 protein</i></b>                                                                                         |                          |           |   |        |        |           |
| Q8TC63                                                                                                              | R.WVLSRLQLQESGPGLLK.P    | 1924.1015 | 2 | 2.242  | 0.0812 | 0.32      |
| <b><i>Import inner membrane translocase subunit TIM50, mitochondrial precursor</i></b>                              |                          |           |   |        |        |           |
| Q3ZCQ8                                                                                                              | K.IPDEFDNDPILVQQLR.R     | 1911.9811 | 2 | 5.575  | 0.6138 | 0.83      |
| Q3ZCQ8                                                                                                              | R.RAPDQAAEIGSR.G         | 1270.6498 | 2 | 2.8218 | 0.3831 | 3.28      |
| <b><i>Inhibitor of nuclear factor kappa-B kinase epsilon subunit (EC 2.7.1.-) (I kappa-B kinase epsilon)</i></b>    |                          |           |   |        |        |           |
| Q14164                                                                                                              | R.C*VVAGMNHLENGIVHR.D    | 1961.9909 | 2 | 2.2021 | 0.1815 | 0.19      |
| <b><i>Inner membrane protein OXA1L, mitochondrial precursor (Oxidase assembly 1-like protein) (OXA1-</i></b>        |                          |           |   |        |        |           |
| Q15070                                                                                                              | R.QTFTHNPLLQPGK.D        | 1480.7907 | 2 | 2.4827 | 0.3121 | 0.45      |
| Q15070                                                                                                              | K.DNPPNIPSSSSKPK.S       | 1467.7438 | 2 | 2.6577 | 0.4429 | 0.49      |
| <b><i>Inositol 1,4,5-trisphosphate receptor type 2 (Type 2 inositol 1,4,5-trisphosphate receptor) (Type 2</i></b>   |                          |           |   |        |        |           |
| Q14571                                                                                                              | K.GGEEPIEESNILSPVQDGTK.K | 2099.0139 | 2 | 3.5461 | 0.4158 | 0.80      |
| <b><i>Inositol 1,4,5-trisphosphate receptor type 3 (Type 3 inositol 1,4,5-trisphosphate receptor) (Type 3</i></b>   |                          |           |   |        |        |           |
| Q14573                                                                                                              | R.LFTTTEQDEQGSK.V        | 1483.6911 | 2 | 3.8092 | 0.4452 | 0.12      |
| <b><i>Intraflagellar transport 81 (Carnitine deficiency-associated protein expressed in ventricle 1) (CDV-1</i></b> |                          |           |   |        |        |           |
| Q8WYA0                                                                                                              | K.KEAKAEELQEAK.E         | 1373.7271 | 2 | 3.2581 | 0.1047 | 3.09      |
| <b><i>ITI-like protein (Inter-alpha (Globulin) inhibitor H5-like)</i></b>                                           |                          |           |   |        |        |           |

| Acc #                                                                                     | Peptide                 | MH+       | z | XC     | DCN    | H/L ratio |
|-------------------------------------------------------------------------------------------|-------------------------|-----------|---|--------|--------|-----------|
| Q6UXX5                                                                                    | K.NVVFVIDVSSSMFGTK[M    | 1733.8909 | 2 | 2.5029 | 0.1343 | 103.23    |
| <b><i>Jagunal homolog 1</i></b>                                                           |                         |           |   |        |        |           |
| Q8N5M9                                                                                    | R.AAGTDGSDFQHR.E        | 1261.5556 | 2 | 3.1465 | 0.5101 | 0.32      |
| <b><i>Ka35 protein</i></b>                                                                |                         |           |   |        |        |           |
| Q6A163                                                                                    | K.ADLEAQVQSLK.E         | 1201.6423 | 2 | 2.3319 | 0.1769 | 0.61      |
| Q6A163                                                                                    | K.ADLEAQVQSLK.E         | 1201.6423 | 2 | 2.2123 | 0.1351 | 0.81      |
| <b><i>Kenae1</i></b>                                                                      |                         |           |   |        |        |           |
| Q86Z20                                                                                    | K.NIEESWIQKYDR.L        | 1580.7703 | 2 | 2.4321 | 0.1158 | 0.04      |
| <b><i>Keratin 10</i></b>                                                                  |                         |           |   |        |        |           |
| Q14664                                                                                    | R.YSSSSKQFSSSR.S        | 1350.6284 | 2 | 4.0119 | 0.5919 | 0.17      |
| <b><i>Keratin, type I cytoskeletal 14 (Cytokeratin-14) (CK-14) (Keratin-14) (K14)</i></b> |                         |           |   |        |        |           |
| P02533                                                                                    | K.DAEWFFTK.T            | 1172.5259 | 2 | 3.2831 | 0.4147 | 0.81      |
| <b><i>Keratin, type I cytoskeletal 16 (Cytokeratin-16) (CK-16) (Keratin-16) (K16)</i></b> |                         |           |   |        |        |           |
| P08779                                                                                    | K.IIAATIENAQPILQIDNAR[L | 2068.1528 | 2 | 4.6533 | 0.5177 | 1.19      |
| <b><i>Keratin, type I cytoskeletal 18 (Cytokeratin-18) (CK-18) (Keratin-18) (K18)</i></b> |                         |           |   |        |        |           |
| P05783                                                                                    | R.AQIFANTVDNAR.I        | 1319.6702 | 2 | 4.3068 | 0.5562 | 0.18      |
| P05783                                                                                    | R.SLGSVQAPSYGAR.P       | 1292.6593 | 2 | 3.2396 | 0.1684 | 0.30      |
| P05783                                                                                    | K.VIDDTNITR[L           | 1050.5557 | 2 | 3.5691 | 0.4425 | 0.56      |
| P05783                                                                                    | K.VIDDTNITR.L           | 1046.5477 | 2 | 2.9744 | 0.4989 | 0.56      |
| P05783                                                                                    | R.QAQEYEALLNIK.V        | 1419.7478 | 2 | 3.1854 | 0.5032 | 0.16      |
| P05783                                                                                    | R.SLGSVQAPSYGAR.P       | 1292.6593 | 2 | 2.7201 | 0.1162 | 0.25      |
| P05783                                                                                    | R.TVQSLEIDLDSMR.N       | 1506.7468 | 2 | 3.0801 | 0.3838 | 0.18      |
| P05783                                                                                    | K.VIDDTNITR[L           | 1050.5557 | 1 | 2.4654 | 0.2468 | 0.70      |
| P05783                                                                                    | K.VIDDTNITR.L           | 1046.5477 | 1 | 2.1398 | 0.4776 | 0.70      |
| P05783                                                                                    | R.AQIFANTVDNAR.I        | 1319.6702 | 2 | 3.69   | 0.4823 | 0.82      |
| P05783                                                                                    | R.AQIFANTVDNAR.I        | 1319.6702 | 1 | 2.0332 | 0.512  | 0.27      |
| P05783                                                                                    | K.VVSETNDTK.V           | 992.4895  | 1 | 2.2288 | 0.3185 | 0.04      |
| P05783                                                                                    | R.AQYDELAR.K            | 965.4687  | 1 | 2.124  | 0.2363 | 0.30      |
| P05783                                                                                    | K.VVSETNDTK.V           | 992.4895  | 1 | 2.1202 | 0.2381 | 0.04      |
| P05783                                                                                    | R.SLGSVQAPSYGAR[P       | 1296.6673 | 2 | 3.2809 | 0.136  | 0.25      |
| <b><i>Keratin, type I cytoskeletal 9 (Cytokeratin-9) (CK-9) (Keratin-9) (K9)</i></b>      |                         |           |   |        |        |           |
| P35527                                                                                    | K.VQALEEANNNDLENK.I     | 1586.7657 | 2 | 5.1567 | 0.5173 | 0.57      |
| P35527                                                                                    | K.STMQELNSR.L           | 1065.4993 | 2 | 2.8872 | 0.359  | 0.76      |
| P35527                                                                                    | R.SGGGGGGGLGSGGSIR.S    | 1232.5978 | 2 | 4.7719 | 0.5984 | 0.79      |

| Acc #  | Peptide                             | MH+       | z | XC     | DCN    | H/L ratio |
|--------|-------------------------------------|-----------|---|--------|--------|-----------|
| P35527 | K.STMQELNSR.L                       | 1065.4993 | 1 | 1.9947 | 0.2413 | 2.00      |
| P35527 | K.STMQELNSR[L.L                     | 1069.5073 | 1 | 1.9758 | 0.1664 | 2.00      |
| P35527 | R.QEYEQLIAK[L.N                     | 1125.5917 | 1 | 2.1675 | 0.1675 | 0.98      |
| P35527 | K.NYSPYYNTIDDLK.D                   | 1605.7431 | 2 | 3.0342 | 0.4535 | 0.18      |
| P35527 | K.TLLDIDNTR[M.M                     | 1064.5713 | 2 | 2.8142 | 0.2921 | 2.08      |
| P35527 | R.FSSSSGYGGGSSR[V.V                 | 1239.5367 | 2 | 3.1712 | 0.4541 | 2.44      |
| P35527 | R.FSSSSGYGGGSSR[V.V                 | 1239.5367 | 1 | 2.3044 | 0.4027 | 1.07      |
| P35527 | R.QGVDADINGLR.Q                     | 1157.5909 | 2 | 3.329  | 0.4585 | 0.68      |
| P35527 | R.GSGGGSYGGGGSGGGYGGGSGSR.G         | 1791.7277 | 2 | 5.4109 | 0.7144 | 0.11      |
| P35527 | K.VQALEEANNDLENK[L.I                | 1590.7737 | 1 | 3.5649 | 0.3513 | 0.84      |
| P35527 | K.DQIVDLTVGNNK.T                    | 1315.6852 | 2 | 3.722  | 0.509  | 0.35      |
| P35527 | K.VQALEEANNDLENK.L                  | 1586.7657 | 2 | 5.5608 | 0.522  | 0.51      |
| P35527 | K.VQALEEANNDLENK[L.I                | 1590.7737 | 2 | 4.7229 | 0.4456 | 0.51      |
| P35527 | R.SGGGGGGGLGSGGSIR.S                | 1232.5978 | 2 | 4.4568 | 0.5561 | 5.62      |
| P35527 | R.FSSSSGYGGGSSR[V.V                 | 1239.5367 | 2 | 4.0101 | 0.5716 | 3.26      |
| P35527 | K.DIENQYETQITQIEHEVSSSGQEVQSSAK[E.E | 3268.5219 | 3 | 4.7095 | 0.5779 | 0.88      |
| P35527 | K.STMQELNSR.L                       | 1065.4993 | 2 | 2.8053 | 0.3349 | 0.27      |
| P35527 | K.DQIVDLTVGNNK[L.T                  | 1319.6932 | 2 | 3.576  | 0.2199 | 0.35      |
| P35527 | K.VQALEEANNDLENK[L.I                | 1590.7737 | 2 | 3.9878 | 0.3969 | 0.57      |
| P35527 | R.FSSSSGYGGGSSR.V                   | 1235.5287 | 1 | 2.1522 | 0.5106 | 1.10      |
| P35527 | R.SGGGGGGGLGSGGSIR.S                | 1232.5978 | 1 | 2.3846 | 0.4367 | 1.45      |
| P35527 | R.SGGGGGGGLGSGGSIR.S                | 1232.5978 | 2 | 4.6212 | 0.5507 | 0.88      |
| P35527 | R.FSSSSGYGGGSSR.V                   | 1235.5287 | 1 | 2.3774 | 0.4211 | 1.07      |
| P35527 | K.TLLDIDNTR.M                       | 1060.5633 | 1 | 2.0577 | 0.2677 | 0.44      |
| P35527 | K.DQIVDLTVGNNK.T                    | 1315.6852 | 1 | 2.5143 | 0.598  | 0.23      |
| P35527 | K.TLLDIDNTR.M                       | 1060.5633 | 1 | 2.267  | 0.302  | 0.49      |
| P35527 | K.TLLDIDNTR[M.M                     | 1064.5713 | 1 | 2.3541 | 0.1691 | 0.49      |
| P35527 | K.TLLDIDNTR[M.M                     | 1064.5713 | 2 | 3.1063 | 0.3059 | 2.35      |
| P35527 | K.TLLDIDNTR.M                       | 1060.5633 | 2 | 2.8653 | 0.4155 | 2.35      |
| P35527 | K.VQALEEANNDLENK[L.I                | 1590.7737 | 2 | 3.6416 | 0.2654 | 1.94      |
| P35527 | R.GSGGGSYGGGGSGGGYGGGSGSR.G         | 1791.7277 | 2 | 5.983  | 0.7035 | 0.09      |
| P35527 | K.TLLDIDNTR.M                       | 1060.5633 | 2 | 2.5834 | 0.4667 | 2.08      |
| P35527 | K.VQALEEANNDLENK.L                  | 1586.7657 | 1 | 3.0614 | 0.3877 | 0.84      |
| P35527 | K.STMQELNSR.L                       | 1065.4993 | 1 | 2.2014 | 0.1947 | 1.28      |

***Keratin, type II cytoskeletal I (Cytokeratin-1) (CK-1) (Keratin-1) (K1) (67 kDa cytoke-***

|        |               |          |   |        |        |      |
|--------|---------------|----------|---|--------|--------|------|
| P04264 | R.TLLEGEESR.M | 1033.516 | 1 | 2.1236 | 0.2193 | 0.68 |
|--------|---------------|----------|---|--------|--------|------|

| Acc #  | Peptide            | MH+       | z | XC     | DCN    | H/L ratio |
|--------|--------------------|-----------|---|--------|--------|-----------|
| P04264 | K.LNDLEDALQQAK[E   | 1361.7038 | 2 | 5.2156 | 0.4575 | 1.68      |
| P04264 | R.SLDLDSIIAEVK.A   | 1302.7151 | 2 | 3.9534 | 0.4468 | 0.48      |
| P04264 | R.TLLEGEESR[M      | 1037.524  | 1 | 2.196  | 0.2835 | 0.84      |
| P04264 | R.SLDLDSIIAEVK.A   | 1302.7151 | 1 | 2.4206 | 0.3851 | 1.47      |
| P04264 | R.SEIDNVKK[Q       | 936.5127  | 2 | 2.4941 | 0.213  | 1.96      |
| P04264 | K.LNDLEDALQQAK.E   | 1357.6958 | 1 | 2.7534 | 0.4007 | 0.92      |
| P04264 | R.TNAENEFVTIK.K    | 1265.6372 | 2 | 3.7776 | 0.4901 | 1.90      |
| P04264 | K.LNDLEDALQQAK[E   | 1361.7038 | 2 | 2.6902 | 0.2472 | 1.68      |
| P04264 | R.GSGGGSSGGSIGGR.G | 1092.5028 | 1 | 2.0161 | 0.4463 | 1.39      |
| P04264 | R.TLLEGEESR[M      | 1037.524  | 1 | 2.285  | 0.2694 | 0.68      |
| P04264 | R.TLLEGEESR[M      | 1037.524  | 2 | 2.4905 | 0.0974 | 1.20      |
| P04264 | R.TLLEGEESR.M      | 1033.516  | 2 | 2.4555 | 0.389  | 1.20      |
| P04264 | R.TLLEGEESR[M      | 1037.524  | 1 | 2.101  | 0.1292 | 0.68      |
| P04264 | R.SLDLDSIIAEVK.A   | 1302.7151 | 2 | 4.215  | 0.4148 | 0.40      |
| P04264 | R.SLDLDSIIAEVK[A   | 1306.7231 | 1 | 2.3639 | 0.1519 | 1.82      |
| P04264 | K.LNDLEDALQQAK[E   | 1361.7038 | 2 | 4.5826 | 0.4528 | 1.68      |
| P04264 | R.GSGGGSSGGSIGGR.G | 1092.5028 | 2 | 3.5633 | 0.4323 | 1.37      |
| P04264 | R.TNAENEFVTIK.K    | 1265.6372 | 1 | 2.0442 | 0.3341 | 1.32      |
| P04264 | K.YEELQITAGR.H     | 1179.6004 | 1 | 2.5473 | 0.4233 | 0.93      |
| P04264 | K.SLNNQFASFIDK.V   | 1383.6903 | 2 | 3.6352 | 0.4433 | 0.16      |
| P04264 | R.DYQELMNTK.L      | 1141.5194 | 1 | 2.725  | 0.4052 | 0.98      |
| P04264 | R.DYQELMNTK[L      | 1145.5274 | 1 | 2.9507 | 0.3026 | 0.98      |
| P04264 | R.GSGGGSSGGSIGGR.G | 1092.5028 | 2 | 3.406  | 0.4606 | 1.49      |
| P04264 | K.AEAESLYQSK[Y     | 1129.5502 | 1 | 2.4883 | 0.3629 | 1.04      |
| P04264 | R.GSGGGSSGGSIGGR[G | 1096.5108 | 1 | 2.1491 | 0.3494 | 1.61      |
| P04264 | K.DVDGAYMTK.V      | 999.4452  | 2 | 2.3961 | 0.5261 | 1.36      |
| P04264 | K.WELLQQVDTSTR[T   | 1479.7569 | 1 | 2.3154 | 0.4554 | 2.68      |
| P04264 | K.DVDGAYMTK.V      | 999.4452  | 1 | 2.2965 | 0.4178 | 0.68      |
| P04264 | R.GSGGGSSGGSIGGR[G | 1096.5108 | 2 | 3.7758 | 0.5108 | 1.37      |
| P04264 | K.LNDLEDALQQAK[E   | 1361.7038 | 2 | 4.6145 | 0.4688 | 1.49      |
| P04264 | K.YEELQITAGR[H     | 1183.6084 | 1 | 2.357  | 0.2982 | 0.93      |
| P04264 | K.LNDLEDALQQAK[E   | 1361.7038 | 2 | 4.9394 | 0.4395 | 1.49      |
| P04264 | K.SLNNQFASFIDK.V   | 1383.6903 | 2 | 3.353  | 0.4464 | 0.29      |
| P04264 | R.SLDLDSIIAEVK[A   | 1306.7231 | 1 | 2.5815 | 0.2976 | 1.47      |
| P04264 | K.YEELQITAGR.H     | 1179.6004 | 2 | 3.9533 | 0.5144 | 0.73      |
| P04264 | K.WELLQQVDTSTR.T   | 1475.7489 | 2 | 3.9216 | 0.4606 | 1.42      |



| Acc #  | Peptide                  | MH+       | z | XC     | DCN    | H/L ratio |
|--------|--------------------------|-----------|---|--------|--------|-----------|
| P04264 | K.DVDGAYMTK[V            | 1003.4532 | 1 | 2.2821 | 0.4562 | 0.68      |
| P04264 | R.DYQELMNTK[L            | 1145.5274 | 1 | 2.953  | 0.2983 | 0.84      |
| P04264 | K.LNDLEDALQQAK[E         | 1361.7038 | 1 | 2.8443 | 0.3532 | 0.92      |
| P04264 | R.FSSC*GGGGGSGAGGGFGSR.S | 1765.7347 | 2 | 4.0077 | 0.5621 | 1.42      |
| P04264 | R.TLLEGEESR.M            | 1033.516  | 2 | 2.3004 | 0.3218 | 1.74      |
| P04264 | R.TNAENEFVTIK.K          | 1265.6372 | 1 | 1.9024 | 0.1641 | 1.15      |
| P04264 | R.TLLEGEESR[M            | 1037.524  | 1 | 2.0428 | 0.2232 | 0.89      |
| P04264 | R.TLLEGEESR[M            | 1037.524  | 2 | 2.8002 | 0.2354 | 1.74      |
| P04264 | R.TLLEGEESR[M            | 1037.524  | 1 | 2.2203 | 0.3296 | 0.89      |
| P04264 | K.SLNNQFASFDK[V          | 1387.6983 | 1 | 1.9186 | 0.1439 | 0.30      |
| P04264 | R.TLLEGEESR[M            | 1037.524  | 2 | 2.5304 | 0.1584 | 1.42      |
| P04264 | R.DYQELMNTK.L            | 1141.5194 | 1 | 2.6823 | 0.4268 | 0.84      |
| P04264 | R.TNAENEFVTIK.K          | 1265.6372 | 2 | 3.5032 | 0.5286 | 1.56      |
| P04264 | K.AEAESLYQSK.Y           | 1125.5422 | 1 | 2.1397 | 0.3498 | 1.04      |
| P04264 | R.TNAENEFVTIK[K          | 1269.6452 | 1 | 2.1071 | 0.2556 | 1.15      |
| P04264 | R.DYQELMNTK.L            | 1141.5194 | 2 | 2.8724 | 0.4027 | 2.10      |
| P04264 | K.AEAESLYQSK[Y           | 1129.5502 | 1 | 2.6723 | 0.2477 | 1.04      |
| P04264 | K.AEAESLYQSK.Y           | 1125.5422 | 2 | 3.7109 | 0.5627 | 0.58      |
| P04264 | K.AEAESLYQSK.Y           | 1125.5422 | 1 | 2.6075 | 0.4011 | 1.04      |
| P04264 | K.AEAESLYQSK[Y           | 1129.5502 | 1 | 2.7006 | 0.4227 | 1.04      |
| P04264 | R.TNAENEFVTIK[K          | 1269.6452 | 2 | 3.6878 | 0.3814 | 1.60      |
| P04264 | R.TLLEGEESR.M            | 1033.516  | 1 | 2.2731 | 0.2257 | 0.89      |
| P04264 | K.LNDLEDALQQAK[E         | 1361.7038 | 2 | 4.527  | 0.413  | 1.41      |
| P04264 | R.TNAENEFVTIK.K          | 1265.6372 | 1 | 1.9113 | 0.1416 | 1.05      |
| P04264 | K.WELLQQVDTSTR[T         | 1479.7569 | 2 | 4.1529 | 0.3932 | 0.80      |
| P04264 | R.TNAENEFVTIK[K          | 1269.6452 | 1 | 1.9616 | 0.1868 | 1.05      |
| P04264 | R.TLLEGEESR[M            | 1037.524  | 1 | 1.9493 | 0.1359 | 0.84      |
| P04264 | K.LNDLEDALQQAK[E         | 1361.7038 | 1 | 2.7186 | 0.3828 | 1.28      |
| P04264 | R.DYQELMNTK.L            | 1141.5194 | 1 | 2.539  | 0.4162 | 0.68      |
| P04264 | K.QISNLQQSISDAEQR.G      | 1716.8511 | 2 | 4.6722 | 0.5926 | 0.85      |
| P04264 | K.QISNLQQSISDAEQR[G      | 1720.8591 | 2 | 4.7732 | 0.4017 | 0.85      |
| P04264 | K.WELLQQVDTSTR.T         | 1475.7489 | 2 | 4.0916 | 0.5042 | 0.76      |
| P04264 | K.SLNNQFASFDK.V          | 1383.6903 | 2 | 3.6917 | 0.4499 | 0.25      |
| P04264 | R.SGGGFSSGSAGIINYQR.R    | 1657.7929 | 2 | 4.3161 | 0.5525 | 0.69      |
| P04264 | K.SISISVAR[G             | 836.4967  | 2 | 2.3829 | 0.1808 | 4.31      |
| P04264 | K.QISNLQQSISDAEQR[G      | 1720.8591 | 2 | 4.5529 | 0.3851 | 1.24      |

| Acc #                                                                                                 | Peptide                  | MH+       | z | XC     | DCN    | H/L ratio |
|-------------------------------------------------------------------------------------------------------|--------------------------|-----------|---|--------|--------|-----------|
| P04264                                                                                                | R.DYQELMNTK[L            | 1145.5274 | 1 | 2.7737 | 0.3124 | 0.68      |
| P04264                                                                                                | R.FSSC*GGGGGSFGAGGGFGR[S | 1769.7427 | 2 | 5.518  | 0.5843 | 1.42      |
| P04264                                                                                                | K.LNDLEDALQQAK.E         | 1357.6958 | 2 | 4.7501 | 0.4021 | 1.49      |
| P04264                                                                                                | K.SLNNQFASFDK.V          | 1383.6903 | 1 | 3.0498 | 0.221  | 0.30      |
| <b><i>Keratin, type II cytoskeletal 1b</i></b>                                                        |                          |           |   |        |        |           |
| Q7Z794                                                                                                | K.MEIAELNR[T             | 979.5008  | 1 | 1.9528 | 0.0902 | 0.42      |
| <b><i>Keratin, type II cytoskeletal 5 (Cytokeratin-5) (CK-5) (Keratin-5) (K5) (58 kDa cytoke-</i></b> |                          |           |   |        |        |           |
| P13647                                                                                                | K.LAELEEALQK[A           | 1147.6336 | 1 | 2.5401 | 0.1063 | 0.94      |
| P13647                                                                                                | K.YEELQQTAGR[H           | 1198.5829 | 1 | 2.3668 | 0.34   | 1.81      |
| P13647                                                                                                | K.LAELEEALQK.A           | 1143.6256 | 1 | 2.0986 | 0.2067 | 0.94      |
| P13647                                                                                                | K.LAELEEALQK.A           | 1143.6256 | 2 | 3.861  | 0.4078 | 0.59      |
| P13647                                                                                                | K.LAELEEALQK[A           | 1147.6336 | 2 | 4.0632 | 0.3693 | 0.59      |
| <b><i>Keratin, type II cytoskeletal 7 (Cytokeratin-7) (CK-7) (Keratin-7) (K7) (Sarcole-</i></b>       |                          |           |   |        |        |           |
| P08729                                                                                                | K.LEAAIAEAEER.G          | 1201.6059 | 2 | 3.763  | 0.4727 | 0.27      |
| P08729                                                                                                | R.LDADPSLQR.V            | 1014.5214 | 2 | 2.5173 | 0.2613 | 0.79      |
| P08729                                                                                                | R.PGGLGSSSLYGLGASR.P     | 1478.7598 | 2 | 4.9835 | 0.6427 | 0.63      |
| P08729                                                                                                | R.LPDIFEAQIAGLR.G        | 1442.8002 | 2 | 2.8126 | 0.3797 | 6.34      |
| P08729                                                                                                | R.LPDIFEAQIAGLR.G        | 1442.8002 | 2 | 3.2707 | 0.5615 | 0.30      |
| P08729                                                                                                | K.VDALNDEINFLR.T         | 1418.7274 | 2 | 3.8463 | 0.1854 | 0.31      |
| <b><i>Keratin, type II cytoskeletal 8 (Cytokeratin-8) (CK-8) (Keratin-8) (K8)</i></b>                 |                          |           |   |        |        |           |
| P05787                                                                                                | R.LQAEIEGLK.G            | 1000.5673 | 1 | 2.3397 | 0.2474 | 0.11      |
| P05787                                                                                                | R.LQAEIEGLK.G            | 1000.5673 | 1 | 2.2144 | 0.3087 | 0.09      |
| P05787                                                                                                | R.LQAEIEGLK.G            | 1000.5673 | 1 | 2.1364 | 0.1998 | 0.09      |
| P05787                                                                                                | R.LQAEIEGLK.G            | 1000.5673 | 1 | 2.2099 | 0.1119 | 0.11      |
| P05787                                                                                                | R.LQAEIEGLK.G            | 1000.5673 | 2 | 2.2805 | 0.3339 | 0.11      |
| <b><i>Keratinocyte associated protein 2</i></b>                                                       |                          |           |   |        |        |           |
| Q6PG45                                                                                                | K.ISSTLYQAAAPVLTAK.V     | 1730.9687 | 2 | 4.3933 | 0.623  | 0.62      |
| <b><i>KIAA1731 protein (Fragment)</i></b>                                                             |                          |           |   |        |        |           |
| Q9C0D2                                                                                                | K.HIMEIEEQK[Q            | 1160.5747 | 2 | 2.7872 | 0.2339 | 82.56     |
| <b><i>KIAA1853 protein (Fragment)</i></b>                                                             |                          |           |   |        |        |           |
| Q96JH4                                                                                                | R.KPALPSLLGAQR[L         | 1254.7659 | 1 | 1.9016 | 0.1159 | 4.30      |
| <b><i>Kinectin (Kinesin receptor) (CG-1 antigen)</i></b>                                              |                          |           |   |        |        |           |
| Q86UP2                                                                                                | K.ECMAGTSGSEEVK.V        | 1327.5504 | 2 | 2.7165 | 0.3983 | 0.42      |
| <b><i>Kinesin-like protein KIF22 (Kinesin-like DNA-binding protein) (Kinesin-like protein 4)</i></b>  |                          |           |   |        |        |           |

| Acc #                                                                                                               | Peptide                 | MH+       | z | XC     | DCN    | H/L ratio |
|---------------------------------------------------------------------------------------------------------------------|-------------------------|-----------|---|--------|--------|-----------|
| Q14807                                                                                                              | K.ESGAINSTSLFVLGK.V     | 1435.7791 | 2 | 2.2944 | 0.1938 | 0.58      |
| <b><i>Kynureninase (EC 3.7.1.3) (L-kynurenine hydrolase)</i></b>                                                    |                         |           |   |        |        |           |
| Q16719                                                                                                              | K.FTNLLTSILDSAETK.N     | 1652.8741 | 2 | 2.5024 | 0.213  | 0.22      |
| <b><i>Lanosterol synthase (EC 5.4.99.7) (Oxidosqualene--lanosterol cyclase) (2,3-epoxysqualene--lanosterol)</i></b> |                         |           |   |        |        |           |
| P48449                                                                                                              | R.DGTAC*AEVSRACDFLLSR.Q | 1970.9059 | 2 | 2.5154 | 0.1069 | 0.33      |
| <b><i>Large neutral amino acids transporter small subunit 1 (L-type amino acid transporter 1) (4F2 light)</i></b>   |                         |           |   |        |        |           |
| Q01650                                                                                                              | K.GDVSNLDPNFSFEGTK.L    | 1726.7919 | 2 | 4.5152 | 0.4742 | 0.30      |
| Q01650                                                                                                              | K.GDVSNLDPNFSFEGTK.L    | 1726.7919 | 2 | 4.3905 | 0.4535 | 0.09      |
| Q01650                                                                                                              | K.GDVSNLDPNFSFEGTK.L    | 1726.7919 | 2 | 4.8914 | 0.4606 | 0.17      |
| Q01650                                                                                                              | K.GDVSNLDPNFSFEGTK.L    | 1726.7919 | 1 | 3.1466 | 0.5864 | 0.55      |
| Q01650                                                                                                              | K.GDVSNLDPNFSFEGTK.L    | 1726.7919 | 2 | 4.7619 | 0.4589 | 0.22      |
| Q01650                                                                                                              | K.GDVSNLDPNFSFEGTK[L.L  | 1730.7999 | 2 | 4.1296 | 0.4493 | 0.20      |
| <b><i>Leucine zipper transcription factor-like 1</i></b>                                                            |                         |           |   |        |        |           |
| Q8TC61                                                                                                              | K.TLNDKTENQK[S          | 1194.6092 | 2 | 2.3321 | 0.1018 | 8.93      |
| <b><i>Leucine zipper-EF-hand containing transmembrane protein 1, mitochondrial precursor</i></b>                    |                         |           |   |        |        |           |
| O95202                                                                                                              | K.VAEVEGEQVDNK.A        | 1316.6329 | 2 | 4.1886 | 0.4187 | 0.27      |
| <b><i>Leukocyte immunoglobulin-like receptor subfamily B member 4 precursor (Leukocyte)</i></b>                     |                         |           |   |        |        |           |
| Q8NHJ6                                                                                                              | R.QNPLEPKNKAR.F         | 1294.7226 | 2 | 2.2883 | 0.1133 | 1.03      |
| <b><i>LLGL protein</i></b>                                                                                          |                         |           |   |        |        |           |
| O00188                                                                                                              | R.PQVHYSCIR.K           | 1102.5462 | 2 | 2.2057 | 0.1018 | 0.52      |
| <b><i>LOC389203 protein (Fragment)</i></b>                                                                          |                         |           |   |        |        |           |
| Q8N5G0                                                                                                              | R.AGIVQEDVQPPGLK.V      | 1450.79   | 2 | 3.5312 | 0.5692 | 0.17      |
| <b><i>LOC51234 protein</i></b>                                                                                      |                         |           |   |        |        |           |
| Q9BUI5                                                                                                              | R.GSQGQDGLYPVGYLTK.Q    | 1655.7911 | 2 | 3.5465 | 0.5607 | 0.54      |
| <b><i>Long-chain fatty acid transport protein 1 (EC 6.2.1.-) (Fatty acid transport protein 1) (FATP-1)</i></b>      |                         |           |   |        |        |           |
| Q6PCB7                                                                                                              | K.TARRDLFGLSVLIR.V      | 1616.9595 | 2 | 2.7476 | 0.1507 | 0.10      |
| <b><i>Lysosome membrane protein II (LIMP II) (Scavenger receptor class B member 2) (85 kDa lysosomal)</i></b>       |                         |           |   |        |        |           |
| Q14108                                                                                                              | R.DQSVGDPK.I            | 845.3999  | 1 | 1.9061 | 0.1408 | 0.20      |
| Q14108                                                                                                              | R.VEEVGPYTYR.E          | 1212.5895 | 2 | 3.0808 | 0.4384 | 0.31      |
| <b><i>Macrophage migration inhibitory factor (MIF) (Phenylpyruvate tautomerase) (EC 5.3.2.1)</i></b>                |                         |           |   |        |        |           |
| P14174                                                                                                              | -.PMFIVNTNVPR.A         | 1287.6878 | 2 | 3.2464 | 0.5796 | 0.41      |
| <b><i>MBC3205 (Hypothetical protein UNQ501)</i></b>                                                                 |                         |           |   |        |        |           |
| Q6UW68                                                                                                              | R.HTFGLVQSK.L           | 1016.5524 | 2 | 2.2252 | 0.5907 | 0.47      |

| Acc #                                                                                                         | Peptide                  | MH+       | z | XC     | DCN    | H/L ratio |
|---------------------------------------------------------------------------------------------------------------|--------------------------|-----------|---|--------|--------|-----------|
| <b><i>Mcd4p homolog</i></b>                                                                                   |                          |           |   |        |        |           |
| O95427                                                                                                        | K.GWKENPVEFDLNFESK.Y     | 2025.9552 | 2 | 2.3328 | 0.1254 | 0.34      |
| <b><i>Membrane associated progesterone receptor component 1 (mPR)</i></b>                                     |                          |           |   |        |        |           |
| O00264                                                                                                        | K.FYGPEGPYGVFAGR.D       | 1516.7219 | 2 | 4.1382 | 0.6447 | 0.98      |
| O00264                                                                                                        | R.GDQPAASGDSDDDEPPPLPR.L | 2035.8839 | 2 | 4.8741 | 0.7283 | 0.22      |
| O00264                                                                                                        | R.FDGVQDPR.I             | 933.4425  | 2 | 2.263  | 0.1976 | 0.27      |
| O00264                                                                                                        | R.GDQPAASGDSDDDEPPPLPR.L | 2035.8839 | 2 | 5.09   | 0.7424 | 0.34      |
| O00264                                                                                                        | K.EGEEPTVYSDEEPEK.D      | 1737.7337 | 2 | 3.6372 | 0.4999 | 0.24      |
| <b><i>Membrane associated progesterone receptor component 2 (Progesterone membrane binding protein)</i></b>   |                          |           |   |        |        |           |
| O15173                                                                                                        | R.GLGAGAGAGEESPATSLPR[M  | 1701.8533 | 2 | 4.0244 | 0.5094 | 2.31      |
| O15173                                                                                                        | R.GLGAGAGAGEESPATSLPR.M  | 1697.8453 | 2 | 5.0456 | 0.5325 | 2.31      |
| O15173                                                                                                        | R.DFSLEQLR.Q             | 1007.5156 | 2 | 2.4383 | 0.4273 | 0.38      |
| O15173                                                                                                        | R.DFSLEQLR.Q             | 1007.5156 | 1 | 1.9925 | 0.2555 | 0.35      |
| <b><i>Membrane protein (STMF151) (LOC54499) (Xenogeneic cross-immune protein)</i></b>                         |                          |           |   |        |        |           |
| Q9UM00                                                                                                        | K.QAGGFLGPPPPSGK.F       | 1309.6899 | 2 | 3.7699 | 0.467  | 0.55      |
| Q9UM00                                                                                                        | K.ETITESAGR.Q            | 963.4742  | 1 | 2.1412 | 0.3293 | 0.31      |
| Q9UM00                                                                                                        | R.DLSMVR.M               | 720.3709  | 1 | 2.0548 | 0.1373 | 0.24      |
| <b><i>MGC13159 protein</i></b>                                                                                |                          |           |   |        |        |           |
| Q5BJH2                                                                                                        | R.EGDAGPETSTAVEK.K       | 1390.6332 | 2 | 3.105  | 0.5823 | 0.28      |
| <b><i>Microsomal glutathione S-transferase 1 (EC 2.5.1.18) (Microsomal GST-1) (Microsomal GST-I)</i></b>      |                          |           |   |        |        |           |
| P10620                                                                                                        | R.KVFANPEDC*VAFGK.G      | 1581.773  | 2 | 2.2763 | 0.3087 | 0.67      |
| P10620                                                                                                        | R.KVFANPEDC*VAFGK.G      | 1581.773  | 2 | 3.4597 | 0.4158 | 0.65      |
| P10620                                                                                                        | K.VFANPEDC*VAFGK.G       | 1453.678  | 2 | 3.4745 | 0.5199 | 0.36      |
| P10620                                                                                                        | K.VFANPEDC*VAFGK.G       | 1453.678  | 2 | 3.5678 | 0.6443 | 0.54      |
| P10620                                                                                                        | R.KVFANPEDC*VAFGK[G      | 1585.781  | 2 | 2.4376 | 0.2285 | 0.67      |
| <b><i>Migration-inducing protein 7</i></b>                                                                    |                          |           |   |        |        |           |
| Q5J9I5                                                                                                        | R.WIPSSWFPRVILKQC*K.R    | 2045.1153 | 2 | 2.438  | 0.2145 | 0.47      |
| <b><i>Minor histocompatibility antigen H13 (EC 3.4.99.-) (Signal peptide peptidase) (Presenilin-like)</i></b> |                          |           |   |        |        |           |
| Q8TCT9                                                                                                        | K.NASDMPETITSR.D         | 1321.6053 | 2 | 2.3375 | 0.3832 | 0.25      |
| Q8TCT9                                                                                                        | K.LVFPQDLLEK.G           | 1201.6827 | 2 | 2.3541 | 0.5317 | 0.40      |
| Q8TCT9                                                                                                        | K.DPAAVTESK[E            | 921.4655  | 1 | 3.1334 | 0.3983 | 0.24      |
| Q8TCT9                                                                                                        | K.DPAAVTESK.E            | 917.4575  | 1 | 2.4939 | 0.5319 | 0.24      |
| Q8TCT9                                                                                                        | K.NASDMPETITSR.D         | 1321.6053 | 2 | 2.7894 | 0.3659 | 0.24      |
| Q8TCT9                                                                                                        | R.QYQLLFTQSGENK.E        | 1612.7966 | 2 | 4.4811 | 0.5834 | 0.27      |

| Acc #                                                                                                           | Peptide              | MH+       | z | XC     | DCN    | H/L ratio |
|-----------------------------------------------------------------------------------------------------------------|----------------------|-----------|---|--------|--------|-----------|
| Q8TCT9                                                                                                          | K.DPAAVTESK.E        | 917.4575  | 2 | 2.834  | 0.3563 | 0.31      |
| <b><i>Mitochondrial 2-oxoglutarate/malate carrier protein (OGCP) (Solute carrier family 25 member 11)</i></b>   |                      |           |   |        |        |           |
| Q02978                                                                                                          | K.NVFNALIR.I         | 946.5469  | 1 | 2.0559 | 0.191  | 0.27      |
| Q02978                                                                                                          | K.NVFNALIR.I         | 946.5469  | 2 | 2.2729 | 0.192  | 0.13      |
| <b><i>Mitochondrial aspartate-glutamate carrier protein</i></b>                                                 |                      |           |   |        |        |           |
| Q546F9                                                                                                          | R.YLNIFGESQPNPK.T    | 1506.7587 | 2 | 4.2025 | 0.4866 | 0.42      |
| Q546F9                                                                                                          | K.DVEVTKEEFVLAQK.F   | 1705.9007 | 2 | 4.5912 | 0.5487 | 2.53      |
| Q546F9                                                                                                          | K.TVELLSGVVDQTK.D    | 1388.7631 | 2 | 3.5537 | 0.4449 | 0.29      |
| Q546F9                                                                                                          | R.PVLLQVAESAYR.F     | 1345.7474 | 2 | 3.9677 | 0.529  | 0.19      |
| <b><i>Mitochondrial carrier homolog 2 (Met-induced mitochondrial protein)</i></b>                               |                      |           |   |        |        |           |
| Q9Y6C9                                                                                                          | K.VLIQVGYEPLPPTIGR.N | 1752.0054 | 2 | 3.942  | 0.4814 | 0.43      |
| Q9Y6C9                                                                                                          | K.EVSSFDHVIK.E       | 1247.6266 | 2 | 2.8835 | 0.4666 | 0.16      |
| Q9Y6C9                                                                                                          | R.GLFTGLTPR.L        | 961.5465  | 1 | 1.9989 | 0.3553 | 0.11      |
| Q9Y6C9                                                                                                          | K.EVSSFDHVIK.E       | 1247.6266 | 2 | 2.5718 | 0.2701 | 0.13      |
| Q9Y6C9                                                                                                          | K.VLIQVGYEPLPPTIGR.N | 1752.0054 | 2 | 3.7804 | 0.4486 | 0.43      |
| Q9Y6C9                                                                                                          | R.LC*SGVLGTVVHGK.V   | 1326.7198 | 2 | 3.6002 | 0.5512 | 0.38      |
| Q9Y6C9                                                                                                          | R.GLFTGLTPR.L        | 961.5465  | 2 | 2.6393 | 0.4582 | 0.10      |
| Q9Y6C9                                                                                                          | R.GLFTGLTPR.L        | 961.5465  | 1 | 2.5825 | 0.4204 | 0.13      |
| Q9Y6C9                                                                                                          | K.GEELGPGNVQK.E      | 1127.5691 | 2 | 3.4874 | 0.479  | 0.24      |
| Q9Y6C9                                                                                                          | R.GLFTGLTPR.L        | 961.5465  | 1 | 2.1371 | 0.2995 | 0.13      |
| <b><i>Mitochondrial dicarboxylate carrier</i></b>                                                               |                      |           |   |        |        |           |
| Q9UBX3                                                                                                          | K.GSQGPLPFHEK.V      | 1196.6058 | 2 | 2.7728 | 0.1758 | 0.04      |
| Q9UBX3                                                                                                          | K.VHLQQTQEVK.L       | 1209.6586 | 2 | 2.2906 | 0.457  | 0.25      |
| <b><i>Mitochondrial import inner membrane translocase subunit Tim17-B</i></b>                                   |                      |           |   |        |        |           |
| O60830                                                                                                          | R.YTAQQFR.N          | 913.4526  | 1 | 1.959  | 0.3393 | 0.31      |
| <b><i>Mitochondrial import receptor subunit TOM20 homolog (Mitochondrial 20 kDa outer membrane</i></b>          |                      |           |   |        |        |           |
| Q15388                                                                                                          | K.DAEAVQK.F          | 760.3836  | 1 | 2.2092 | 0.2616 | 0.19      |
| <b><i>Mitochondrial import receptor subunit TOM22 homolog (Translocase of outer membrane 22 kDa</i></b>         |                      |           |   |        |        |           |
| Q9NS69                                                                                                          | K.LQMEQQQLQQR.Q      | 1557.7802 | 2 | 3.7997 | 0.4405 | 0.15      |
| <b><i>Mitochondrial inner membrane protein (Mitofilin) (p87/89) (Proliferation-inducing gene 4 protein)</i></b> |                      |           |   |        |        |           |
| Q16891                                                                                                          | K.SEFEQNLSEK.L       | 1210.5586 | 2 | 3.3158 | 0.4258 | 0.40      |
| Q16891                                                                                                          | R.SEIQAEQDR.K        | 1075.5014 | 2 | 2.2663 | 0.2066 | 0.13      |
| Q16891                                                                                                          | K.LSEQELQFR[.R       | 1153.5979 | 2 | 3.9689 | 0.2852 | 1.23      |
| Q16891                                                                                                          | K.PHITAAEGK.L        | 923.4945  | 1 | 2.514  | 0.378  | 0.43      |

| Acc #                                                                                                | Peptide                 | MH+       | z | XC     | DCN    | H/L ratio |
|------------------------------------------------------------------------------------------------------|-------------------------|-----------|---|--------|--------|-----------|
| Q16891                                                                                               | K.SVIENAK[K             | 764.4279  | 1 | 2.1098 | 0.1267 | 0.20      |
| Q16891                                                                                               | K.EVAGAKPHITAAEGK.L     | 1478.7962 | 2 | 3.719  | 0.4542 | 0.42      |
| Q16891                                                                                               | K.SVIENAK[K             | 764.4279  | 1 | 2.1232 | 0.1273 | 0.19      |
| Q16891                                                                                               | R.SEIQAEQDR.K           | 1075.5014 | 1 | 2.0403 | 0.2972 | 0.31      |
| Q16891                                                                                               | R.ELDSITPEVLPGWK.G      | 1583.8316 | 2 | 3.4771 | 0.4313 | 1.19      |
| Q16891                                                                                               | R.SEIQAEQDR.K           | 1075.5014 | 2 | 2.9137 | 0.3426 | 0.13      |
| Q16891                                                                                               | K.TSSAETPTIPLGSAVEAIK.A | 1871.996  | 2 | 4.2104 | 0.5293 | 0.36      |
| Q16891                                                                                               | K.TSSAETPTIPLGSAVEAIK[A | 1876.004  | 2 | 3.9432 | 0.4168 | 0.36      |
| Q16891                                                                                               | K.VQAAQSEAK.V           | 931.4843  | 1 | 2.3452 | 0.2931 | 0.25      |
| Q16891                                                                                               | K.EVAGAKPHITAAEGK[L     | 1482.8042 | 2 | 3.756  | 0.5069 | 0.35      |
| Q16891                                                                                               | K.AVDEAADALLK.A         | 1115.5943 | 2 | 3.0516 | 0.3712 | 0.31      |
| Q16891                                                                                               | K.AAMDNSEIAGEK.K        | 1235.5572 | 1 | 2.1295 | 0.4264 | 0.26      |
| Q16891                                                                                               | K.LSEQELQFR.R           | 1149.5899 | 1 | 2.2882 | 0.3175 | 0.56      |
| Q16891                                                                                               | K.AAMDNSEIAGEK.K        | 1235.5572 | 2 | 3.4135 | 0.4217 | 0.51      |
| Q16891                                                                                               | K.TSSAETPTIPLGSAVEAIK.A | 1871.996  | 2 | 4.4692 | 0.5668 | 0.31      |
| Q16891                                                                                               | K.EVAGAKPHITAAEGK[L     | 1482.8042 | 2 | 3.2593 | 0.5085 | 0.42      |
| Q16891                                                                                               | K.LSEQELQFR.R           | 1149.5899 | 2 | 2.8773 | 0.3792 | 0.53      |
| Q16891                                                                                               | K.PHITAAEGK.L           | 923.4945  | 1 | 2.1986 | 0.1947 | 0.43      |
| Q16891                                                                                               | K.TSSAETPTIPLGSAVEAIK.A | 1871.996  | 2 | 4.7236 | 0.5635 | 0.51      |
| Q16891                                                                                               | K.AAMDNSEIAGEK.K        | 1235.5572 | 1 | 2.0966 | 0.2674 | 0.26      |
| Q16891                                                                                               | R.SEIQAEQDR.K           | 1075.5014 | 2 | 2.7227 | 0.3811 | 0.18      |
| Q16891                                                                                               | K.AVDEAADALLK.A         | 1115.5943 | 2 | 2.4499 | 0.3086 | 0.19      |
| Q16891                                                                                               | K.TSSAETPTIPLGSAVEAIK.A | 1871.996  | 2 | 4.9766 | 0.5501 | 0.28      |
| Q16891                                                                                               | K.EVAGAKPHITAAEGK.L     | 1478.7962 | 2 | 3.7759 | 0.4994 | 0.35      |
| Q16891                                                                                               | K.AVDEAADALLK[A         | 1119.6023 | 2 | 2.5856 | 0.3267 | 0.19      |
| Q16891                                                                                               | K.LSEQELQFR.R           | 1149.5899 | 2 | 3.6387 | 0.3417 | 1.23      |
| Q16891                                                                                               | R.SEIQAEQDR.K           | 1075.5014 | 2 | 2.784  | 0.4    | 0.36      |
| Q16891                                                                                               | K.TSSAETPTIPLGSAVEAIK[A | 1876.004  | 2 | 3.7785 | 0.4203 | 0.28      |
| Q16891                                                                                               | K.TSSAETPTIPLGSAVEAIK.A | 1871.996  | 2 | 5.0433 | 0.487  | 0.31      |
| <b><i>Mitochondrial precursor proteins import receptor (Translocase of outer membrane TOM70)</i></b> |                         |           |   |        |        |           |
| O94826                                                                                               | R.LRPESALAAQAK.C        | 1311.7379 | 2 | 3.1197 | 0.4491 | 0.22      |
| <b><i>Mitogen-activated protein kinase kinase kinase 15 (Fragment)</i></b>                           |                         |           |   |        |        |           |
| Q5JPR4                                                                                               | K.ETLLNDIRKAR[E         | 1332.7725 | 2 | 2.3501 | 0.0953 | 7.98      |
| <b><i>Mitsugumin-23 precursor (Mg23)</i></b>                                                         |                         |           |   |        |        |           |
| Q9BVC6                                                                                               | R.EAPVDVLTQIGR.S        | 1297.711  | 2 | 3.4176 | 0.4558 | 0.72      |

| Acc #                                                                | Peptide                   | MH+       | z | XC     | DCN    | H/L ratio |
|----------------------------------------------------------------------|---------------------------|-----------|---|--------|--------|-----------|
| Q9BVC6                                                               | R.EAPVDVLTQIGR.S          | 1297.711  | 2 | 2.2924 | 0.2059 | 0.72      |
| Q9BVC6                                                               | R.RDFAPPQQK.R             | 1143.5905 | 2 | 2.2499 | 0.2385 | 0.06      |
| <b><i>Monocarboxylate transporter 1 (MCT 1)</i></b>                  |                           |           |   |        |        |           |
| P53985                                                               | K.EEETSIDVAGKPNEVTK.A     | 1845.9076 | 2 | 3.4324 | 0.5421 | 0.67      |
| P53985                                                               | K.EEETSIDVAGKPNEVTK[A     | 1849.9156 | 2 | 3.5281 | 0.4131 | 0.67      |
| P53985                                                               | K.EEETSIDVAGKPNEVTK.A     | 1845.9076 | 2 | 4.3592 | 0.5919 | 0.71      |
| P53985                                                               | K.EEETSIDVAGKPNEVTK[A     | 1849.9156 | 2 | 4.2247 | 0.499  | 0.71      |
| P53985                                                               | K.EEETSIDVAGKPNEVTK[A     | 1849.9156 | 2 | 4.2388 | 0.4297 | 0.70      |
| P53985                                                               | K.EEETSIDVAGKPNEVTK.A     | 1845.9076 | 2 | 4.3487 | 0.5748 | 0.70      |
| <b><i>Monocarboxylate transporter 4 (MCT 4) (MCT 3)</i></b>          |                           |           |   |        |        |           |
| O15427                                                               | K.DLGVPDTK.A              | 844.4411  | 1 | 2.0253 | 0.3273 | 0.13      |
| O15427                                                               | R.PLVVTAQPGSGPPRPSR.R     | 1715.9551 | 2 | 2.8257 | 0.4389 | 0.22      |
| O15427                                                               | K.EPQPEVAAAEEEEK.L        | 1426.6696 | 2 | 2.4532 | 0.3695 | 0.19      |
| O15427                                                               | R.LLDLSVFR.D              | 962.5669  | 2 | 2.8892 | 0.2564 | 0.24      |
| O15427                                                               | K.EPQPEVAAAEEEEK.L        | 1426.6696 | 2 | 2.5578 | 0.6089 | 0.21      |
| O15427                                                               | R.LLDLSVFR.D              | 962.5669  | 1 | 1.9514 | 0.1744 | 0.23      |
| O15427                                                               | K.EPQPEVAAAEEEEK.L        | 1426.6696 | 1 | 2.6052 | 0.4982 | 0.30      |
| O15427                                                               | K.EPQPEVAAAEEEEK[L        | 1430.6776 | 2 | 2.2006 | 0.1063 | 0.21      |
| O15427                                                               | R.PAAGFVAGLGK.V           | 987.5622  | 2 | 3.6758 | 0.5098 | 0.12      |
| O15427                                                               | K.EPQPEVAAAEEEEK.L        | 1426.6696 | 1 | 2.1808 | 0.5655 | 0.24      |
| O15427                                                               | K.EPQPEVAAAEEEEK.L        | 1426.6696 | 2 | 2.2903 | 0.5432 | 0.20      |
| O15427                                                               | R.LLDLSVFR.D              | 962.5669  | 1 | 2.7316 | 0.2607 | 0.29      |
| <b><i>MOP-3</i></b>                                                  |                           |           |   |        |        |           |
| Q9H3T8                                                               | R.GVGAMEIVAMDMKLRGMYIAR.Q | 2312.1746 | 2 | 2.2404 | 0.1871 | 0.21      |
| <b><i>mRNA decapping enzyme 1B (EC 3.-.-.-)</i></b>                  |                           |           |   |        |        |           |
| Q8IZD4                                                               | K.FPVLAQSSGTGK.P          | 1191.6368 | 2 | 2.2061 | 0.11   | 0.12      |
| <b><i>Myb-related protein B (B-Myb)</i></b>                          |                           |           |   |        |        |           |
| P10244                                                               | R.SEAGIELIIEDDIRPEK.Q     | 1927.0019 | 2 | 2.4535 | 0.1217 | 0.18      |
| <b><i>Myosin Ib (Myosin I alpha) (MMI-alpha) (MMIa) (MYH-1c)</i></b> |                           |           |   |        |        |           |
| O43795                                                               | R.DQFTDQQK.L              | 1009.4585 | 2 | 2.3044 | 0.1586 | 0.27      |
| O43795                                                               | K.LEASELFK.D              | 936.5037  | 1 | 1.9265 | 0.257  | 8.13      |
| O43795                                                               | K.EIC*ELTGIDQSVLER.A      | 1761.8687 | 2 | 4.8128 | 0.4903 | 1.17      |
| O43795                                                               | K.EIC*ELTGIDQSVLER[A      | 1765.8767 | 2 | 4.1355 | 0.22   | 1.17      |
| <b><i>Myosin IE</i></b>                                              |                           |           |   |        |        |           |
| Q4KMR3                                                               | K.QGLFPNNYVTK.I           | 1280.6634 | 2 | 3.1048 | 0.2986 | 0.41      |

| Acc #                                                                                                          | Peptide               | MH+       | z | XC     | DCN    | H/L ratio |
|----------------------------------------------------------------------------------------------------------------|-----------------------|-----------|---|--------|--------|-----------|
| <b><i>Myosin-10 (Myosin heavy chain, nonmuscle IIb) (Nonmuscle myosin heavy chain IIb) (NMMHC II-)</i></b>     |                       |           |   |        |        |           |
| P35580                                                                                                         | R.LQQELDDLTVLDLHQ.R.Q | 1937.9563 | 2 | 5.0668 | 0.635  | 2.03      |
| P35580                                                                                                         | K.TELEDTLDTTAAQQELR.T | 1933.9349 | 2 | 4.8129 | 0.5581 | 0.35      |
| P35580                                                                                                         | K.DLEAQIEAANK.A       | 1201.6059 | 2 | 4.0827 | 0.277  | 0.06      |
| <b><i>Myosin-9 (Myosin heavy chain, nonmuscle IIa) (Nonmuscle myosin heavy chain IIa) (NMMHC II-a)</i></b>     |                       |           |   |        |        |           |
| P35579                                                                                                         | R.ELEDATETADAMNR.E    | 1565.6748 | 2 | 4.2086 | 0.6222 | 0.43      |
| P35579                                                                                                         | K.TELEDTLDTTAAQQELR.S | 1919.9193 | 2 | 6.2004 | 0.6192 | 0.77      |
| P35579                                                                                                         | K.KVEAQLQELQVK.F      | 1412.8108 | 2 | 4.0835 | 0.4345 | 0.49      |
| P35579                                                                                                         | R.EQLEEEEEAK.H        | 1233.5481 | 1 | 3.1224 | 0.2407 | 0.20      |
| P35579                                                                                                         | K.DLEGLSQR[.H         | 921.4767  | 1 | 2.0605 | 0.1966 | 0.42      |
| P35579                                                                                                         | R.VEEEEAAQK.N         | 903.4418  | 1 | 2.2208 | 0.1887 | 0.31      |
| P35579                                                                                                         | R.VEEEEAAQK.N         | 903.4418  | 2 | 2.7042 | 0.0819 | 0.29      |
| P35579                                                                                                         | R.ELESQISELQEDLESER.A | 2033.9509 | 2 | 3.1075 | 0.3622 | 0.75      |
| P35579                                                                                                         | R.EQEVNILK.K          | 972.536   | 1 | 1.9564 | 0.1375 | 0.37      |
| P35579                                                                                                         | R.VEEEEAAQK.N         | 903.4418  | 2 | 2.9283 | 0.3132 | 0.29      |
| P35579                                                                                                         | K.KVEAQLQELQVK[.F     | 1416.8188 | 2 | 2.6774 | 0.1105 | 0.49      |
| P35579                                                                                                         | R.ELEDATETADAMNR[.E   | 1569.6828 | 2 | 3.5661 | 0.4057 | 0.43      |
| P35579                                                                                                         | R.EQLEEEEEAK.H        | 1233.5481 | 2 | 2.5149 | 0.4413 | 0.25      |
| P35579                                                                                                         | K.LEEEEQIILEDQNC*K.L  | 1760.8371 | 2 | 4.3693 | 0.2671 | 0.33      |
| <b><i>Myotubularin (EC 3.1.3.48)</i></b>                                                                       |                       |           |   |        |        |           |
| Q13496                                                                                                         | R.VATFRSRNR.I         | 1106.6177 | 2 | 2.2556 | 0.3396 | 0.56      |
| <b><i>N-acetylgalactosaminyltransferase</i></b>                                                                |                       |           |   |        |        |           |
| Q76KP1                                                                                                         | R.GSDHVEVGWRAFLPGLK.F | 1867.9813 | 2 | 2.68   | 0.0993 | 0.16      |
| Q76KP1                                                                                                         | R.FLLELELQERGGGR.L    | 1616.8755 | 2 | 2.3271 | 0.1548 | 0.03      |
| <b><i>N-acetylgalactosaminyltransferase 7 (EC 2.4.1.-) (Protein-UDP acetylgalactosaminyltransferase 7)</i></b> |                       |           |   |        |        |           |
| Q86SF2                                                                                                         | R.DVNDPMPNR.G         | 1057.4731 | 2 | 2.3399 | 0.4454 | 0.09      |
| <b><i>NAD(P) transhydrogenase, mitochondrial precursor (EC 1.6.1.2) (Pyridine nucleotide)</i></b>              |                       |           |   |        |        |           |
| Q13423                                                                                                         | K.AVVLAANHFGR.F       | 1154.6429 | 2 | 3.4126 | 0.4978 | 0.53      |
| <b><i>NAD-dependent deacetylase sirtuin-5 (EC 3.5.1.-) (SIR2-like protein 5)</i></b>                           |                       |           |   |        |        |           |
| Q9NXA8                                                                                                         | R.RVVVITQNIDELHRK[.A  | 1824.0581 | 2 | 3.4157 | 0.1708 | 0.86      |
| <b><i>NADH-cytochrome b5 reductase (EC 1.6.2.2) (B5R) (Diaphorase-1) (Cytochrome b5 reductase 3)</i></b>       |                       |           |   |        |        |           |
| P00387                                                                                                         | R.STPAITLESPIK.Y      | 1371.7366 | 2 | 2.9313 | 0.429  | 0.11      |
| P00387                                                                                                         | R.STPAITLESPIK.Y      | 1371.7366 | 2 | 2.9083 | 0.3975 | 0.08      |
| P00387                                                                                                         | R.STPAITLESPIK.Y      | 1371.7366 | 1 | 2.1783 | 0.4798 | 0.22      |



| Acc #                                                                                                    | Peptide                     | MH+       | z | XC     | DCN    | H/L ratio |
|----------------------------------------------------------------------------------------------------------|-----------------------------|-----------|---|--------|--------|-----------|
| <b><i>NADH-ubiquinone oxidoreductase 30 kDa subunit, mitochondrial precursor (EC 1.6.5.3) (EC</i></b>    |                             |           |   |        |        |           |
| O75489                                                                                                   | R.VVAEPVELAQEFR.K           | 1486.79   | 2 | 3.3041 | 0.5148 | 0.53      |
| <b><i>NADH-ubiquinone oxidoreductase 51 kDa subunit, mitochondrial precursor (EC 1.6.5.3) (EC</i></b>    |                             |           |   |        |        |           |
| P49821                                                                                                   | K.YLVVNADEGEPGTC*K.D        | 1651.7632 | 2 | 3.8426 | 0.5585 | 1.25      |
| <b><i>NADH-ubiquinone oxidoreductase 75 kDa subunit, mitochondrial precursor (EC 1.6.5.3) (EC</i></b>    |                             |           |   |        |        |           |
| P28331                                                                                                   | R.ALSEIAGMTLPYDTLDQVR.N     | 2093.0583 | 2 | 3.0366 | 0.1693 | 0.46      |
| <b><i>NADH-ubiquinone oxidoreductase B12 subunit (EC 1.6.5.3) (EC 1.6.99.3) (Complex I-B12) (CI-</i></b> |                             |           |   |        |        |           |
| O43676                                                                                                   | K.IEGTPLETIQK.K             | 1228.6783 | 2 | 2.6809 | 0.3911 | 0.49      |
| <b><i>NADH-ubiquinone oxidoreductase B17 subunit (EC 1.6.5.3) (EC 1.6.99.3) (Complex I-B17) (CI-</i></b> |                             |           |   |        |        |           |
| O95139                                                                                                   | R.IFPGDTILETGEVIPPME.E      | 1957.0351 | 2 | 3.1985 | 0.4154 | 0.17      |
| <b><i>NADH-ubiquinone oxidoreductase chain 4 (EC 1.6.5.3) (NADH dehydrogenase subunit 4)</i></b>         |                             |           |   |        |        |           |
| P03905                                                                                                   | R.LTLILNPLTK.H              | 1125.7242 | 1 | 3.0054 | 0.3532 | 0.20      |
| <b><i>NADH-ubiquinone oxidoreductase chain 6 (EC 1.6.5.3) (NADH dehydrogenase subunit 6)</i></b>         |                             |           |   |        |        |           |
| P03923                                                                                                   | R.EDPIGAGALYDYGR.W          | 1496.7016 | 2 | 3.1943 | 0.5484 | 0.31      |
| <b><i>NADH-ubiquinone oxidoreductase flavoprotein 3, isoform a</i></b>                                   |                             |           |   |        |        |           |
| Q8WU60                                                                                                   | R.GGTQEPAPVPAEPDNTTYK.N     | 2118.9978 | 2 | 3.4295 | 0.436  | 0.50      |
| <b><i>NADPH--cytochrome P450 reductase (EC 1.6.2.4) (CPR) (P450R)</i></b>                                |                             |           |   |        |        |           |
| P16435                                                                                                   | K.RLEQLGAQR.I               | 1070.6065 | 2 | 3.6916 | 0.3553 | 0.40      |
| P16435                                                                                                   | R.ESSFVEK[M                 | 829.4069  | 1 | 1.9233 | 0.2847 | 0.74      |
| P16435                                                                                                   | K.RLEQLGAQR[I               | 1074.6145 | 2 | 3.0428 | 0.1786 | 0.40      |
| P16435                                                                                                   | R.YESGDHVAVYPANDSALVNQLGK.I | 2447.1837 | 2 | 4.0928 | 0.6485 | 0.85      |
| P16435                                                                                                   | R.SDEDYLYR.E                | 1060.4582 | 2 | 2.4296 | 0.3121 | 0.40      |
| P16435                                                                                                   | R.YYSIASSSK.V               | 1005.4888 | 1 | 2.1621 | 0.45   | 1.17      |
| P16435                                                                                                   | K.NPFLAAVTTNR.K             | 1203.648  | 2 | 3.8385 | 0.3528 | 0.43      |
| P16435                                                                                                   | R.SDEDYLYR.E                | 1060.4582 | 1 | 1.9807 | 0.4665 | 0.27      |
| P16435                                                                                                   | R.SDEDYLYR.E                | 1060.4582 | 2 | 2.8687 | 0.4211 | 0.40      |
| P16435                                                                                                   | R.SDEDYLYR.E                | 1060.4582 | 1 | 1.9918 | 0.3112 | 0.27      |
| P16435                                                                                                   | R.YYSIASSSK.V               | 1005.4888 | 1 | 2.102  | 0.403  | 1.17      |
| P16435                                                                                                   | R.ESSFVEK.M                 | 825.3989  | 1 | 2.0203 | 0.1408 | 1.37      |
| P16435                                                                                                   | K.NPFLAAVTTNR.K             | 1203.648  | 1 | 2.7688 | 0.4003 | 0.42      |
| P16435                                                                                                   | R.DGALTQLNVAFSR[E           | 1395.7358 | 2 | 3.6047 | 0.416  | 2.95      |
| P16435                                                                                                   | K.FAVFGLGNK.T               | 952.5251  | 2 | 3.0185 | 0.3573 | 0.19      |
| P16435                                                                                                   | K.NPFLAAVTTNR.K             | 1203.648  | 2 | 2.8596 | 0.3246 | 0.34      |
| P16435                                                                                                   | K.NPFLAAVTTNR.K             | 1203.648  | 2 | 4.1988 | 0.3375 | 0.34      |

| Acc #                                                                                                       | Peptide                    | MH+       | z | XC     | DCN    | H/L ratio |
|-------------------------------------------------------------------------------------------------------------|----------------------------|-----------|---|--------|--------|-----------|
| P16435                                                                                                      | K.NPFLAAVTTNR.K            | 1203.648  | 2 | 4.1982 | 0.3418 | 0.34      |
| P16435                                                                                                      | K.IQTLTSSVR.E              | 1004.5735 | 2 | 2.5423 | 0.4131 | 0.93      |
| P16435                                                                                                      | K.NPFLAAVTTNR.K            | 1203.648  | 1 | 2.5248 | 0.3113 | 0.42      |
| P16435                                                                                                      | K.FAVFGLGNK.T              | 952.5251  | 1 | 1.93   | 0.2953 | 0.09      |
| P16435                                                                                                      | R.YYSIASSSK[V              | 1009.4968 | 1 | 1.9396 | 0.3669 | 1.17      |
| <b><i>Nascent polypeptide-associated complex alpha subunit (NAC-alpha) (Alpha-NAC) (Hom s 2.02)</i></b>     |                            |           |   |        |        |           |
| Q13765                                                                                                      | K.IEDLSQQAQLAAAEKFK.V      | 1889.9967 | 2 | 2.4682 | 0.1198 | 0.67      |
| <b><i>NEDD4-binding protein 2 (EC 3.-.-) (N4BP2) (BCL-3-binding protein)</i></b>                            |                            |           |   |        |        |           |
| Q86UW6                                                                                                      | K.LQATDKSENEQIEMVAVK.G     | 2033.0219 | 2 | 2.4669 | 0.1064 | 0.18      |
| <b><i>NEDD4-like ubiquitin ligase 1</i></b>                                                                 |                            |           |   |        |        |           |
| Q9HCC7                                                                                                      | R.GGYHDGHLVIRWFVAVER[F     | 2273.1494 | 2 | 2.5145 | 0.1057 | 0.81      |
| <b><i>Neighbor of COX4</i></b>                                                                              |                            |           |   |        |        |           |
| O43402                                                                                                      | K.DASPNQVAEK.V             | 1058.5113 | 2 | 2.4645 | 0.4383 | 0.26      |
| <b><i>Neural cell adhesion molecule L1 precursor (N-CAM L1) (CD171 antigen)</i></b>                         |                            |           |   |        |        |           |
| P32004                                                                                                      | K.VGEEDDGEYR[C             | 1172.4833 | 2 | 3.1524 | 0.2933 | 0.50      |
| P32004                                                                                                      | K.VGEEDDGEYR.C             | 1168.4753 | 2 | 3.378  | 0.4747 | 0.50      |
| P32004                                                                                                      | R.LVVFPDDISLK.C            | 1346.7566 | 2 | 2.8663 | 0.4386 | 0.13      |
| <b><i>Neuromodulin (Axonal membrane protein GAP-43) (Growth associated protein 43) (PP46) (Neural</i></b>   |                            |           |   |        |        |           |
| P17677                                                                                                      | K.DDVQAAEAEANKK[D          | 1392.6732 | 2 | 2.3081 | 0.1766 | 2.99      |
| <b><i>Neuronal acetylcholine receptor protein, alpha-5 subunit precursor</i></b>                            |                            |           |   |        |        |           |
| P30532                                                                                                      | R.CGLAGAAGGAQRGLSEPSSIAK[H | 2005.0262 | 2 | 2.2004 | 0.0884 | 0.40      |
| <b><i>Neutral alpha-glucosidase AB precursor (EC 3.2.1.84) (Glucosidase II alpha subunit)</i></b>           |                            |           |   |        |        |           |
| Q14697                                                                                                      | K.DPAEGDGAQPEETPR.D        | 1568.6823 | 2 | 4.8685 | 0.5524 | 0.49      |
| <b><i>Neutral amino acid transporter B(0) (ATB(0)) (Sodium-dependent neutral amino acid transporter</i></b> |                            |           |   |        |        |           |
| Q15758                                                                                                      | R.STEPELIQVK.S             | 1143.6256 | 2 | 2.5996 | 0.4116 | 0.35      |
| Q15758                                                                                                      | R.GPAGDATVASEK.E           | 1102.5375 | 1 | 2.2702 | 0.2211 | 0.88      |
| Q15758                                                                                                      | R.GPAGDATVASEK.E           | 1102.5375 | 2 | 3.6564 | 0.4989 | 0.69      |
| Q15758                                                                                                      | K.SELPLDPLVPTEEGNPLLK.H    | 2158.1642 | 2 | 4.1944 | 0.6634 | 0.83      |
| Q15758                                                                                                      | R.GPAGDATVASEK.E           | 1102.5375 | 1 | 2.858  | 0.3166 | 0.88      |
| Q15758                                                                                                      | K.EVLDSFLDLAR.N            | 1277.6736 | 2 | 3.1261 | 0.4101 | 0.27      |
| <b><i>NGT</i></b>                                                                                           |                            |           |   |        |        |           |
| Q9H2Q2                                                                                                      | K.LGEQVFGTTGK.F            | 1136.5946 | 2 | 3.5596 | 0.5041 | 2.62      |
| Q9H2Q2                                                                                                      | R.SSLFELAK.K               | 894.4931  | 2 | 2.2332 | 0.3242 | 0.33      |
| <b><i>Nitric-oxide synthase, brain (EC 1.14.13.39) (NOS type I) (Neuronal NOS) (N-NOS) (nNOS)</i></b>       |                            |           |   |        |        |           |

| Acc #                                                                                                              | Peptide                 | MH+       | z | XC     | DCN    | H/L ratio |
|--------------------------------------------------------------------------------------------------------------------|-------------------------|-----------|---|--------|--------|-----------|
| P29475                                                                                                             | R.SAITIFPQRTDGKHDFR[V   | 1993.0381 | 2 | 2.4948 | 0.1897 | 23.46     |
| <b><i>Novel protein</i></b>                                                                                        |                         |           |   |        |        |           |
| Q5SWH9                                                                                                             | R.PSSTITYLTDSPK.P       | 1409.7159 | 2 | 3.2721 | 0.5295 | 0.33      |
| Q5JP08                                                                                                             | R.EFDSSTLNESVR.N        | 1383.6387 | 2 | 3.1381 | 0.5797 | 0.22      |
| Q5VZP5                                                                                                             | R.TPESSEREESPEPQR.P     | 1757.7937 | 2 | 2.2058 | 0.1158 | 0.24      |
| <b><i>Nuclear protein 5qNCA</i></b>                                                                                |                         |           |   |        |        |           |
| Q7LBC6                                                                                                             | K.PEAFSQEFGDQDVLVNC*R[N | 2229.9848 | 2 | 3.1081 | 0.2074 | 1.39      |
| <b><i>Nuclear RNA export factor 2 (TAP-like protein 2) (TAPL-2)</i></b>                                            |                         |           |   |        |        |           |
| Q9GZY0                                                                                                             | R.DNFDK.R               | 638.278   | 1 | 1.9583 | 0.1557 | 0.01      |
| Q9GZY0                                                                                                             | R.DNFDK.R               | 638.278   | 1 | 1.9754 | 0.1449 | 0.01      |
| <b><i>Nuclease sensitive element binding protein 1 (Y-box binding protein 1) (Y-box transcription factor)</i></b>  |                         |           |   |        |        |           |
| P67809                                                                                                             | K.NEGSESAPEGQAQQR.R     | 1587.6994 | 2 | 4.2656 | 0.5715 | 0.82      |
| <b><i>Nucleolar RNA helicase 2 (EC 3.6.1.-) (Nucleolar RNA helicase II) (Nucleolar RNA helicase Gu)</i></b>        |                         |           |   |        |        |           |
| Q9NR30                                                                                                             | K.DFSDITK.K             | 825.3989  | 1 | 1.947  | 0.3049 | 0.92      |
| Q9NR30                                                                                                             | K.DFSDITK[K.K           | 829.4069  | 1 | 2.1349 | 0.2803 | 0.92      |
| <b><i>OK/SW-CL.16</i></b>                                                                                          |                         |           |   |        |        |           |
| Q8NI70                                                                                                             | R.RALAPNR.H             | 797.474   | 1 | 2.086  | 0.2322 | 0.28      |
| <b><i>Olfactory receptor 2T1 (Olfactory receptor 1-25) (ORI-25) (Olfactory receptor ORI-61)</i></b>                |                         |           |   |        |        |           |
| O43869                                                                                                             | R.YVAIC*NPLRYPVLMRSR.R  | 1952.0245 | 2 | 2.4039 | 0.1944 | 0.05      |
| <b><i>OTTHUMP00000016784</i></b>                                                                                   |                         |           |   |        |        |           |
| Q5TFD7                                                                                                             | R.KMIPAMDR[R            | 965.5038  | 1 | 2.1279 | 0.0933 | 4.20      |
| <b><i>OTTHUMP00000017314 (Fragment)</i></b>                                                                        |                         |           |   |        |        |           |
| Q5JUJ7                                                                                                             | K.EQETVLQAQVRPGGR.G     | 1667.8824 | 2 | 2.5217 | 0.1577 | 0.25      |
| <b><i>OTTHUMP00000017471</i></b>                                                                                   |                         |           |   |        |        |           |
| Q5VYA5                                                                                                             | K.VPAEDCSEPVQLLR[Y      | 1559.7865 | 2 | 3.0724 | 0.341  | 0.30      |
| <b><i>OTTHUMP00000021035</i></b>                                                                                   |                         |           |   |        |        |           |
| Q4VXA4                                                                                                             | R.AGDNILAVLK.H          | 1013.599  | 2 | 3.6396 | 0.4051 | 0.24      |
| <b><i>OTTHUMP00000031372</i></b>                                                                                   |                         |           |   |        |        |           |
| Q9NQJ4                                                                                                             | R.PPSAFFLFC*SEYHPK[I    | 1830.8651 | 2 | 2.3962 | 0.2236 | 0.53      |
| <b><i>Oxygen-regulated protein 1 (Retinitis pigmentosa RPI protein) (Retinitis pigmentosa 1 protein)</i></b>       |                         |           |   |        |        |           |
| P56715                                                                                                             | R.KSQVCPYNSVEFQCSR.K    | 1874.8524 | 2 | 2.3995 | 0.2541 | 0.49      |
| <b><i>Peptidyl-prolyl cis-trans isomerase B precursor (EC 5.2.1.8) (PPIase) (Rotamase) (Cyclophilin B) (S-</i></b> |                         |           |   |        |        |           |
| P23284                                                                                                             | K.DTNGSQFFITTVK.T       | 1457.7271 | 2 | 3.6144 | 0.4579 | 5.38      |

| Acc #                                                                                                            | Peptide                     | MH+       | z | XC     | DCN    | H/L ratio |
|------------------------------------------------------------------------------------------------------------------|-----------------------------|-----------|---|--------|--------|-----------|
| P23284                                                                                                           | R.VIFGLFGK.T                | 880.5291  | 1 | 1.9476 | 0.211  | 0.34      |
| <b><i>Peptidyl-tRNA hydrolase 2, mitochondrial precursor (EC 3.1.1.29) (PTH 2) (Bcl-2 inhibitor of</i></b>       |                             |           |   |        |        |           |
| Q9Y3E5                                                                                                           | R.TQIAPGSQTVLGIGPGPADLIDK.V | 2248.2183 | 2 | 6.4517 | 0.6197 | 0.29      |
| <b><i>Pericentrin (Pericentrin B) (Kendrin)</i></b>                                                              |                             |           |   |        |        |           |
| O95613                                                                                                           | K.RLEEMNINIRK.K             | 1415.7787 | 2 | 2.3369 | 0.1181 | 0.65      |
| <b><i>Phosphate carrier protein, mitochondrial precursor (PTP)</i></b>                                           |                             |           |   |        |        |           |
| Q00325                                                                                                           | R.LPRPPPPPEMPESLK.K         | 1587.8563 | 2 | 2.7007 | 0.4776 | 0.12      |
| Q00325                                                                                                           | R.LPRPPPPPEMPESLK.K         | 1587.8563 | 2 | 2.3777 | 0.2484 | 0.26      |
| Q00325                                                                                                           | R.IQTQPGYANTLR.D            | 1361.7172 | 2 | 3.3397 | 0.4556 | 0.41      |
| Q00325                                                                                                           | R.IQTQPGYANTLR.D            | 1361.7172 | 2 | 2.6054 | 0.3754 | 0.41      |
| Q00325                                                                                                           | R.IQTQPGYANTLR.D            | 1361.7172 | 1 | 2.4748 | 0.3804 | 0.39      |
| Q00325                                                                                                           | R.IQTQPGYANTLR.D            | 1361.7172 | 2 | 2.5052 | 0.4311 | 0.47      |
| Q00325                                                                                                           | R.LPRPPPPPEMPESLK.K         | 1587.8563 | 2 | 3.0095 | 0.4885 | 0.17      |
| Q00325                                                                                                           | R.IQTQPGYANTLR.D            | 1361.7172 | 2 | 2.9482 | 0.4421 | 0.43      |
| Q00325                                                                                                           | R.IQTQPGYANTLR.D            | 1361.7172 | 2 | 3.1475 | 0.4721 | 0.47      |
| Q00325                                                                                                           | R.IQTQPGYANTLR.D            | 1361.7172 | 1 | 2.4619 | 0.3343 | 0.37      |
| Q00325                                                                                                           | R.IQTQPGYANTLR[D            | 1365.7252 | 2 | 3.0252 | 0.3757 | 0.34      |
| Q00325                                                                                                           | R.IQTQPGYANTLR.D            | 1361.7172 | 2 | 2.9208 | 0.4485 | 0.34      |
| Q00325                                                                                                           | R.IQTQPGYANTLR.D            | 1361.7172 | 2 | 3.7336 | 0.5275 | 0.41      |
| <b><i>Phosphatidate cytidyltransferase 2 (EC 2.7.7.41) (CDP-diglyceride synthetase 2) (CDP-diglyceride</i></b>   |                             |           |   |        |        |           |
| O95674                                                                                                           | R.AESAPLPVSADDTPEVLNR[A     | 1984.9953 | 2 | 4.0806 | 0.4684 | 0.63      |
| O95674                                                                                                           | R.AESAPLPVSADDTPEVLNR[A     | 1984.9953 | 2 | 4.1665 | 0.5085 | 0.83      |
| O95674                                                                                                           | R.AESAPLPVSADDTPEVLNR.A     | 1980.9873 | 2 | 4.7993 | 0.6301 | 0.84      |
| O95674                                                                                                           | K.VDGETASDSESR.A            | 1252.5288 | 2 | 3.8741 | 0.5614 | 1.07      |
| O95674                                                                                                           | K.VDGETASDSESR.A            | 1252.5288 | 2 | 3.5686 | 0.5155 | 0.96      |
| O95674                                                                                                           | R.AESAPLPVSADDTPEVLNR.A     | 1980.9873 | 2 | 5.195  | 0.6303 | 0.63      |
| <b><i>Phosphatidylinositol-4-phosphate 3-kinase C2 domain-containing beta polypeptide (EC 2.7.1.154)</i></b>     |                             |           |   |        |        |           |
| O00750                                                                                                           | R.THTLKSSGRISDVFLC*R.H      | 1977.0335 | 2 | 2.3782 | 0.3012 | 0.86      |
| <b><i>Phosphatidylserine synthase 1 (EC 2.7.8.-) (PtdSer synthase 1) (PSS-1) (Serine-exchange enzyme I)</i></b>  |                             |           |   |        |        |           |
| P48651                                                                                                           | R.AVLQFTPASWTYVR.W          | 1638.8639 | 2 | 2.2013 | 0.2798 | 0.62      |
| P48651                                                                                                           | R.ILFIGGITAPTVR.Q           | 1357.8202 | 2 | 2.8455 | 0.1883 | 1.03      |
| <b><i>Phosphatidylserine synthase 2 (EC 2.7.8.-) (PtdSer synthase 2) (PSS-2) (Serine-exchange enzyme II)</i></b> |                             |           |   |        |        |           |
| Q9BVG9                                                                                                           | R.ASLEEPPDGPSAGQATGPGEGR.R  | 2079.9578 | 2 | 4.4981 | 0.6294 | 0.44      |
| Q9BVG9                                                                                                           | R.ASLEEPPDGPSAGQATGPGEGR.R  | 2079.9578 | 2 | 4.6045 | 0.6309 | 0.35      |
| Q9BVG9                                                                                                           | R.DAGGPRPESPVPAGR[A         | 1466.7477 | 2 | 2.2668 | 0.2242 | 0.38      |

| Acc #                                                                                                       | Peptide                 | MH+       | z | XC     | DCN    | H/L ratio |
|-------------------------------------------------------------------------------------------------------------|-------------------------|-----------|---|--------|--------|-----------|
| Q9BVG9                                                                                                      | R.DAGGPRPESPVPAGR.A     | 1462.7397 | 2 | 2.3989 | 0.3222 | 0.38      |
| <b><i>Photolyase (Cryptochrome 1)</i></b>                                                                   |                         |           |   |        |        |           |
| Q16526                                                                                                      | K.LSIEYDSEPFQK.E        | 1388.6711 | 2 | 2.4412 | 0.2794 | 0.21      |
| Q16526                                                                                                      | K.LSIEYDSEPFQK.E        | 1384.6631 | 2 | 2.3685 | 0.0899 | 0.17      |
| Q16526                                                                                                      | K.LSIEYDSEPFQK.E        | 1388.6711 | 2 | 2.3524 | 0.2055 | 0.17      |
| Q16526                                                                                                      | K.LSIEYDSEPFQK.E        | 1388.6711 | 2 | 2.2971 | 0.344  | 0.17      |
| Q16526                                                                                                      | K.LSIEYDSEPFQK.E        | 1384.6631 | 2 | 2.5035 | 0.1473 | 0.17      |
| Q16526                                                                                                      | K.LSIEYDSEPFQK.E        | 1384.6631 | 2 | 2.4291 | 0.1119 | 0.21      |
| <b><i>PIK3CA variant protein (Fragment)</i></b>                                                             |                         |           |   |        |        |           |
| Q4LE51                                                                                                      | K.LDKGQIIVVIWVIVSPNDK.Q | 2250.2856 | 2 | 3.1205 | 0.2024 | 0.21      |
| <b><i>Pinin (140 kDa nuclear and cell adhesion-related phosphoprotein) (Domain-rich serine protein)</i></b> |                         |           |   |        |        |           |
| Q9H307                                                                                                      | K.LTEVPVEPVLTVHPESK[S   | 1878.035  | 2 | 3.8937 | 0.5235 | 1.09      |
| Q9H307                                                                                                      | R.DLEGAVSR.L            | 846.4316  | 1 | 1.9054 | 0.1539 | 0.28      |
| Q9H307                                                                                                      | K.LTEVPVEPVLTVHPESK.S   | 1874.027  | 2 | 4.3495 | 0.5555 | 1.09      |
| Q9H307                                                                                                      | R.VESVEPSENEASK.E       | 1404.6489 | 2 | 2.8078 | 0.4983 | 0.43      |
| Q9H307                                                                                                      | K.KPALQSSVVATSK.E       | 1315.758  | 2 | 3.6359 | 0.5757 | 0.51      |
| Q9H307                                                                                                      | R.DLIQDQNMDEK.G         | 1348.6049 | 2 | 3.1835 | 0.493  | 0.20      |
| <b><i>Plasma membrane calcium-transporting ATPase 1 (EC 3.6.3.8) (PMCA1) (Plasma membrane)</i></b>          |                         |           |   |        |        |           |
| P20020                                                                                                      | K.TSPNEGLSGNPADLER.R    | 1656.7824 | 2 | 4.4914 | 0.4905 | 0.24      |
| <b><i>Plexin D1 precursor</i></b>                                                                           |                         |           |   |        |        |           |
| Q9Y4D7                                                                                                      | R.KGFAELQDMDTLTKELNR[S  | 2214.1202 | 2 | 3.2283 | 0.1256 | 2.68      |
| <b><i>PNAS-117</i></b>                                                                                      |                         |           |   |        |        |           |
| Q9HB66                                                                                                      | K.NDDIPEQDSLGLSNLQK.S   | 1885.9138 | 2 | 4.5477 | 0.3192 | 0.40      |
| Q9HB66                                                                                                      | K.NDDIPEQDSLGLSNLQK.S   | 1885.9138 | 2 | 4.7045 | 0.4146 | 0.35      |
| <b><i>Polymerase I and transcript release factor (PTRF protein)</i></b>                                     |                         |           |   |        |        |           |
| Q6NZI2                                                                                                      | K.IIGAVDQIQLTQAQLEER.Q  | 2025.0975 | 2 | 5.3118 | 0.6507 | 0.15      |
| <b><i>Polypeptide N-acetylgalactosaminyltransferase 2 (EC 2.4.1.41) (Protein-UDP)</i></b>                   |                         |           |   |        |        |           |
| Q10471                                                                                                      | K.FNQVESDK.L            | 966.4527  | 1 | 2.1056 | 0.1695 | 0.16      |
| Q10471                                                                                                      | R.NVPYGNIQSR.L          | 1147.5854 | 2 | 2.203  | 0.3706 | 1.07      |
| <b><i>Possible integral membrane</i></b>                                                                    |                         |           |   |        |        |           |
| Q96S06                                                                                                      | R.LPQHTPTSR[I           | 1040.5614 | 2 | 2.6534 | 0.2749 | 10.90     |
| <b><i>Postreplication repair protein RAD18 (hRAD18) (hHR18) (RING finger protein 73)</i></b>                |                         |           |   |        |        |           |
| Q9NS91                                                                                                      | K.NLAVKVYTPVASRQSLK[Q   | 1878.0938 | 2 | 2.3609 | 0.1597 | 0.11      |
| <b><i>Potassium channel tetramerization domain-containing 1 (KCTD1 protein)</i></b>                         |                         |           |   |        |        |           |

| Acc #                                                                                                        | Peptide                                              | MH+       | z | XC     | DCN    | H/L ratio |
|--------------------------------------------------------------------------------------------------------------|------------------------------------------------------|-----------|---|--------|--------|-----------|
| Q719H9                                                                                                       | R.IGRLFDGTEPIVLDSLK[.Q                               | 1877.0509 | 2 | 2.5513 | 0.0895 | 0.22      |
| <b><i>Prickle-like protein 1 (REST/NRSF-interacting LIM domain protein 1)</i></b>                            |                                                      |           |   |        |        |           |
| Q96MT3                                                                                                       | K.FPGLSGNADDTLSRK.L                                  | 1577.7918 | 2 | 2.4133 | 0.269  | 1.17      |
| <b><i>PRKR interacting protein 1 (IL11 inducible)</i></b>                                                    |                                                      |           |   |        |        |           |
| Q96CF8                                                                                                       | K.NAAEEQKCLKLER.L                                    | 1428.7805 | 2 | 2.7991 | 0.1283 | 1.05      |
| <b><i>PRO0756</i></b>                                                                                        |                                                      |           |   |        |        |           |
| Q9H375                                                                                                       | R.MLPFSLQKNVLLKGEK[.A                                | 1849.0747 | 2 | 2.2927 | 0.2034 | 68.93     |
| Q9H375                                                                                                       | R.MLPFSLQKNVLLKGEK[.A                                | 1849.0747 | 2 | 2.6792 | 0.2829 | 62.82     |
| <b><i>Probable cation-transporting ATPase 13A1 (EC 3.6.3.-)</i></b>                                          |                                                      |           |   |        |        |           |
| Q9HD20                                                                                                       | R.SPQENLVPC*DVLLLR.G                                 | 1752.9313 | 2 | 3.8592 | 0.5079 | 0.58      |
| Q9HD20                                                                                                       | K.EFVITSLK.E                                         | 936.5401  | 1 | 1.9539 | 0.2717 | 0.25      |
| Q9HD20                                                                                                       | K.EPIEDLSPDR.V                                       | 1170.5637 | 2 | 2.4021 | 0.4054 | 0.65      |
| Q9HD20                                                                                                       | R.SPQENLVPC*DVLLLR.G                                 | 1752.9313 | 2 | 3.9313 | 0.4637 | 0.58      |
| Q9HD20                                                                                                       | K.EVTPVSSIPVETHR.A                                   | 1550.8173 | 2 | 3.3628 | 0.5533 | 0.81      |
| Q9HD20                                                                                                       | K.EVTPVSSIPVETHR[.A                                  | 1554.8253 | 2 | 2.3583 | 0.1707 | 0.81      |
| <b><i>Probable endonuclease KIAA0830 precursor (EC 3.1.30.-)</i></b>                                         |                                                      |           |   |        |        |           |
| O94919                                                                                                       | R.STLLPPEASEGSSSFLGK[.L                              | 1810.92   | 2 | 2.9699 | 0.3137 | 0.48      |
| O94919                                                                                                       | R.STLLPPEASEGSSSFLGK.L                               | 1806.912  | 2 | 3.3337 | 0.5847 | 0.48      |
| <b><i>Probable G-protein coupled receptor 125 precursor</i></b>                                              |                                                      |           |   |        |        |           |
| Q8IWK6                                                                                                       | K.STGFTGMTCTVFQKVAASDR.T                             | 2106.9947 | 2 | 2.6695 | 0.1094 | 0.15      |
| <b><i>Probable mitochondrial import receptor subunit TOM40 homolog (Translocase of outer membrane)</i></b>   |                                                      |           |   |        |        |           |
| O96008                                                                                                       | K.MAIQTQQSK[.F                                       | 1038.5379 | 1 | 2.3228 | 0.4288 | 0.25      |
| O96008                                                                                                       | R.TPGAATASASGAAEDGAC*GC*LPNPGTFEEC*H3219.3524<br>R.K | 5.807     | 3 | 5.807  | 0.4507 | 1.52      |
| O96008                                                                                                       | K.ELFPIQMEGVK.L                                      | 1290.6762 | 2 | 2.4929 | 0.4133 | 0.36      |
| O96008                                                                                                       | K.ELFPIQMEGVK.L                                      | 1290.6762 | 1 | 2.6784 | 0.279  | 0.10      |
| O96008                                                                                                       | R.RPGEEGTVMSLAGK.Y                                   | 1431.726  | 2 | 3.9363 | 0.589  | 0.36      |
| O96008                                                                                                       | K.MAIQTQQSK.F                                        | 1034.5299 | 1 | 2.158  | 0.3864 | 0.25      |
| O96008                                                                                                       | K.MAIQTQQSK.F                                        | 1034.5299 | 1 | 2.0775 | 0.3786 | 0.23      |
| <b><i>Probable O-sialoglycoprotein endopeptidase (EC 3.4.24.57) (hOSGEP)</i></b>                             |                                                      |           |   |        |        |           |
| Q9NPF4                                                                                                       | R.IFGETIDIAVGNC*LDR[.F                               | 1796.8978 | 2 | 2.289  | 0.1109 | 1.62      |
| <b><i>Probable palmitoyltransferase ZDHHC13 (EC 2.3.1.-) (Zinc finger DHHC domain-containing)</i></b>        |                                                      |           |   |        |        |           |
| Q8IUH4                                                                                                       | R.YGICAHENKELANAR.E                                  | 1688.8173 | 2 | 2.2778 | 0.0831 | 0.03      |
| <b><i>Probable palmitoyltransferase ZDHHC6 (EC 2.3.1.-) (Zinc finger DHHC domain-containing protein)</i></b> |                                                      |           |   |        |        |           |
| Q9H6R6                                                                                                       | R.KCVEKC*PC*DAETDQAPEGEK.K                           | 2293.9734 | 2 | 2.2452 | 0.0983 | 0.16      |

| Acc #                                                                                                               | Peptide                  | MH+       | z | XC     | DCN    | H/L ratio |
|---------------------------------------------------------------------------------------------------------------------|--------------------------|-----------|---|--------|--------|-----------|
| <b><i>Programmed cell death 6-interacting protein (PDCD6-interacting protein) (ALG-2 interacting protein)</i></b>   |                          |           |   |        |        |           |
| Q8WUM4                                                                                                              | R.LLDEEEATDNDLR.A        | 1532.7075 | 2 | 3.9021 | 0.5076 | 0.27      |
| <b><i>Prohibitin</i></b>                                                                                            |                          |           |   |        |        |           |
| P35232                                                                                                              | R.NVPVITGSK.D            | 914.5306  | 1 | 2.4242 | 0.2894 | 0.27      |
| P35232                                                                                                              | R.NVPVITGSK.D            | 914.5306  | 1 | 2.2653 | 0.2747 | 0.18      |
| P35232                                                                                                              | R.NVPVITGSK[D            | 918.5386  | 1 | 2.7473 | 0.4074 | 0.18      |
| P35232                                                                                                              | K.AAIISAEGDSK.A          | 1061.5473 | 1 | 2.5733 | 0.482  | 0.24      |
| P35232                                                                                                              | R.NVPVITGSK.D            | 914.5306  | 1 | 2.3866 | 0.4897 | 0.18      |
| P35232                                                                                                              | R.IFTSIGEDYDER.V         | 1444.6591 | 2 | 3.4318 | 0.5372 | 0.42      |
| P35232                                                                                                              | R.NVPVITGSK.D            | 914.5306  | 1 | 2.4367 | 0.4559 | 0.98      |
| P35232                                                                                                              | K.AAIISAEGDSK.A          | 1061.5473 | 2 | 2.5201 | 0.4367 | 1.02      |
| P35232                                                                                                              | R.IFTSIGEDYDER.V         | 1444.6591 | 1 | 2.9541 | 0.4858 | 0.63      |
| P35232                                                                                                              | K.AAELIANSLATAGDGLIELR.K | 1998.0866 | 2 | 3.2885 | 0.2888 | 0.72      |
| P35232                                                                                                              | K.AAIISAEGDSK.A          | 1061.5473 | 1 | 2.6525 | 0.5996 | 0.24      |
| P35232                                                                                                              | R.ILFRPVASQLPR.I         | 1396.8423 | 2 | 3.3418 | 0.3283 | 0.19      |
| P35232                                                                                                              | K.AAELIANSLATAGDGLIELR.K | 1998.0866 | 2 | 5.7314 | 0.5539 | 0.72      |
| P35232                                                                                                              | R.IFTSIGEDYDER.V         | 1444.6591 | 2 | 3.4144 | 0.5728 | 0.37      |
| P35232                                                                                                              | R.PVASQLPR.I             | 867.5047  | 1 | 2.2335 | 0.2367 | 0.18      |
| P35232                                                                                                              | R.IFTSIGEDYDER.V         | 1444.6591 | 2 | 3.2341 | 0.5421 | 0.43      |
| P35232                                                                                                              | R.NVPVITGSK[D            | 918.5386  | 1 | 2.836  | 0.3548 | 0.27      |
| P35232                                                                                                              | R.NVPVITGSK.D            | 914.5306  | 1 | 2.2824 | 0.4663 | 0.27      |
| P35232                                                                                                              | R.NVPVITGSK.D            | 914.5306  | 1 | 2.3367 | 0.4579 | 0.35      |
| P35232                                                                                                              | R.NVPVITGSK[D            | 918.5386  | 1 | 2.3683 | 0.3487 | 0.27      |
| P35232                                                                                                              | R.IFTSIGEDYDER[V         | 1448.6671 | 2 | 3.3474 | 0.3944 | 0.37      |
| P35232                                                                                                              | K.AAIISAEGDSK.A          | 1061.5473 | 1 | 2.5552 | 0.5935 | 0.76      |
| P35232                                                                                                              | R.IFTSIGEDYDER.V         | 1444.6591 | 2 | 3.4818 | 0.5758 | 0.63      |
| P35232                                                                                                              | R.ILFRPVASQLPR.I         | 1396.8423 | 2 | 3.3026 | 0.295  | 0.25      |
| P35232                                                                                                              | R.PVASQLPR.I             | 867.5047  | 2 | 2.8749 | 0.5158 | 0.31      |
| <b><i>Prohibitin-2 (B-cell receptor-associated protein BAP37) (Repressor of estrogen receptor activity) (D-</i></b> |                          |           |   |        |        |           |
| Q99623                                                                                                              | R.LPAGPR.G               | 610.3671  | 1 | 2.0245 | 0.1893 | 0.41      |
| Q99623                                                                                                              | K.FNASQLITQR.A           | 1177.6324 | 2 | 2.7649 | 0.1844 | 0.56      |
| Q99623                                                                                                              | R.LGLDYEER.V             | 994.484   | 2 | 2.7275 | 0.5726 | 0.92      |
| Q99623                                                                                                              | R.EYTAAVEAK.Q            | 981.4888  | 1 | 2.454  | 0.4369 | 0.55      |
| Q99623                                                                                                              | K.IVQAEGEAEAAK.M         | 1215.6216 | 1 | 2.7522 | 0.459  | 0.23      |
| Q99623                                                                                                              | K.FNASQLITQR.A           | 1177.6324 | 2 | 3.6826 | 0.3975 | 0.56      |

| Acc #  | Peptide               | MH+       | z | XC     | DCN    | H/L ratio |
|--------|-----------------------|-----------|---|--------|--------|-----------|
| Q99623 | R.LGLDYEER.V          | 994.484   | 1 | 1.9554 | 0.2258 | 0.39      |
| Q99623 | R.EYTAAVEAK.Q         | 981.4888  | 1 | 2.3006 | 0.3953 | 1.97      |
| Q99623 | K.DLQMVNISLR.V        | 1188.6405 | 1 | 2.9318 | 0.3804 | 0.48      |
| Q99623 | R.EYTAAVEAK.Q         | 981.4888  | 1 | 2.1682 | 0.3664 | 0.63      |
| Q99623 | R.EYTAAVEAK[.Q        | 985.4968  | 1 | 2.1542 | 0.3942 | 0.86      |
| Q99623 | R.IGGVQQDTILAEGHFR.I  | 1853.9868 | 2 | 4.8911 | 0.6622 | 0.93      |
| Q99623 | R.IGGVQQDTILAEGHFR.I  | 1853.9868 | 3 | 5.0193 | 0.5312 | 0.81      |
| Q99623 | R.EYTAAVEAK.Q         | 981.4888  | 1 | 2.1864 | 0.3865 | 0.86      |
| Q99623 | K.IVQAEGEAEAAK.M      | 1215.6216 | 1 | 2.2104 | 0.3304 | 0.26      |
| Q99623 | R.LGLDYEER.V          | 994.484   | 2 | 2.698  | 0.5457 | 0.81      |
| Q99623 | K.DLQMVNISLR[.V       | 1192.6485 | 1 | 3.1093 | 0.3055 | 0.48      |
| Q99623 | K.IVQAEGEAEAAK.M      | 1215.6216 | 1 | 2.4481 | 0.4154 | 0.26      |
| Q99623 | R.LGLDYEER.V          | 994.484   | 1 | 2.4381 | 0.2708 | 0.47      |
| Q99623 | R.VLPSIVNEVLK.S       | 1210.7406 | 1 | 2.3817 | 0.2189 | 0.51      |
| Q99623 | R.IGGVQQDTILAEGHFR.I  | 1853.9868 | 3 | 5.5359 | 0.5356 | 0.81      |
| Q99623 | R.VLPSIVNEVLK.S       | 1210.7406 | 1 | 2.2574 | 0.4405 | 0.51      |
| Q99623 | K.IVQAEGEAEAAK.M      | 1215.6216 | 1 | 2.3345 | 0.3185 | 0.23      |
| Q99623 | R.IGGVQQDTILAEGHFR.I  | 1853.9868 | 3 | 5.2111 | 0.492  | 0.83      |
| Q99623 | K.FNASQLITQR.A        | 1177.6324 | 2 | 4.1623 | 0.2921 | 0.56      |
| Q99623 | K.FNASQLITQR.A        | 1177.6324 | 1 | 2.1495 | 0.2198 | 0.66      |
| Q99623 | R.AQVSLIR.R           | 899.5673  | 1 | 1.9812 | 0.1433 | 0.36      |
| Q99623 | K.QVAQQAQR.A          | 1057.5385 | 2 | 2.3132 | 0.3205 | 1.98      |
| Q99623 | R.LPAGPR.G            | 610.3671  | 1 | 2.0032 | 0.204  | 0.43      |
| Q99623 | K.IVQAEGEAEAAK.M      | 1215.6216 | 2 | 4.1972 | 0.5317 | 0.36      |
| Q99623 | R.VLPSIVNEVLK.S       | 1210.7406 | 1 | 2.1481 | 0.3187 | 0.56      |
| Q99623 | R.IGGVQQDTILAEGHFR.I  | 1853.9868 | 2 | 5.2079 | 0.6309 | 0.61      |
| Q99623 | K.QVAQQAQR.A          | 1057.5385 | 1 | 2.0388 | 0.2271 | 0.79      |
| Q99623 | R.PNAQELPSMYQR.L      | 1433.6842 | 2 | 3.4478 | 0.4543 | 0.27      |
| Q99623 | R.IGGVQQDTILAEGHFR[.I | 1857.9948 | 2 | 4.6698 | 0.4989 | 0.61      |
| Q99623 | R.VLPSIVNEVLK.S       | 1210.7406 | 2 | 2.3114 | 0.3961 | 0.71      |
| Q99623 | R.IGGVQQDTILAEGHFR[.I | 1857.9948 | 2 | 4.3597 | 0.5326 | 0.93      |
| Q99623 | K.FNASQLITQR[.A       | 1181.6404 | 1 | 2.2056 | 0.3516 | 0.66      |
| Q99623 | K.LLLGAGAVAYGVR.E     | 1259.747  | 2 | 4.5682 | 0.4336 | 0.34      |
| Q99623 | R.EYTAAVEAK[.Q        | 985.4968  | 1 | 1.9899 | 0.3254 | 0.63      |
| Q99623 | K.LLLGAGAVAYGVR.E     | 1259.747  | 2 | 4.3639 | 0.5535 | 0.34      |
| Q99623 | K.DLQMVNISLR.V        | 1188.6405 | 2 | 3.2316 | 0.2523 | 0.15      |



| Acc #                                                                                                           | Peptide                   | MH+       | z | XC     | DCN    | H/L ratio |
|-----------------------------------------------------------------------------------------------------------------|---------------------------|-----------|---|--------|--------|-----------|
| Q99623                                                                                                          | R.EYTAAVEAK.Q             | 981.4888  | 1 | 2.027  | 0.1709 | 0.63      |
| Q99623                                                                                                          | K.DLQMVNISLR.V            | 1188.6405 | 2 | 2.9378 | 0.3448 | 0.15      |
| <b><i>Prolactin regulatory element-binding protein (Mammalian guanine nucleotide exchange factor)</i></b>       |                           |           |   |        |        |           |
| Q9HCU5                                                                                                          | R.VENLQAVQTDFSSDPLQK.V    | 2019.0029 | 2 | 4.4406 | 0.6179 | 1.02      |
| <b><i>Prostaglandin E synthase (EC 5.3.99.3) (Microsomal glutathione S-transferase 1-like 1) (MGST1-L1)</i></b> |                           |           |   |        |        |           |
| O14684                                                                                                          | K.AFANPEDALR.H            | 1103.548  | 2 | 2.7751 | 0.3101 | 0.10      |
| O14684                                                                                                          | K.AFANPEDALR.H            | 1103.548  | 1 | 2.2763 | 0.3106 | 0.47      |
| <b><i>Protein C10orf70</i></b>                                                                                  |                           |           |   |        |        |           |
| Q9NZ45                                                                                                          | K.IVHAFDMEDLGDK.A         | 1489.6992 | 2 | 3.8181 | 0.5756 | 0.78      |
| <b><i>Protein C14orf106 (P243)</i></b>                                                                          |                           |           |   |        |        |           |
| Q6P0N0                                                                                                          | K.LKIGERTNER.I            | 1215.6804 | 1 | 2.2871 | 0.2464 | 0.18      |
| Q6P0N0                                                                                                          | K.LKIGERTNER.I            | 1215.6804 | 1 | 2.2281 | 0.231  | 0.10      |
| Q6P0N0                                                                                                          | K.YMAINQK.K               | 867.4393  | 1 | 2.069  | 0.1062 | 0.92      |
| <b><i>Protein C19orf21</i></b>                                                                                  |                           |           |   |        |        |           |
| Q8IVT2                                                                                                          | R.ALSSDSILSPAPDAR.A       | 1499.77   | 2 | 3.5061 | 0.5135 | 0.33      |
| Q8IVT2                                                                                                          | R.DIVQETQR.E              | 988.5058  | 1 | 2.2515 | 0.2293 | 0.52      |
| Q8IVT2                                                                                                          | R.QQFLSLEQANK.G           | 1305.6797 | 2 | 2.9861 | 0.3935 | 0.64      |
| <b><i>Protein C2orf17</i></b>                                                                                   |                           |           |   |        |        |           |
| Q8NC44                                                                                                          | R.QALDSEEEEEEDVAAK.E      | 1662.7341 | 2 | 2.7165 | 0.4434 | 0.44      |
| <b><i>Protein C9orf5 (Protein CG-2)</i></b>                                                                     |                           |           |   |        |        |           |
| Q9H330                                                                                                          | R.ALNSAANNVYQYGR.E        | 1540.7503 | 2 | 3.2343 | 0.5542 | 0.08      |
| <b><i>Protein expressed in T-cells and eosinophils in atopic dermatitis (ETEA)</i></b>                          |                           |           |   |        |        |           |
| Q96CS3                                                                                                          | R.DLTQEQTTEK.L            | 1091.5215 | 1 | 2.5438 | 0.3297 | 0.18      |
| Q96CS3                                                                                                          | R.DLTQEQTTEK.L            | 1091.5215 | 2 | 2.207  | 0.4332 | 0.25      |
| <b><i>Protein KIAA0152 precursor</i></b>                                                                        |                           |           |   |        |        |           |
| Q14165                                                                                                          | R.SNPEDQILYQTER.Y         | 1592.7551 | 2 | 4.1116 | 0.4485 | 0.32      |
| Q14165                                                                                                          | K.FAEVYFAQSQQK.V          | 1445.706  | 2 | 3.96   | 0.5791 | 0.31      |
| <b><i>Protein KIAA0406</i></b>                                                                                  |                           |           |   |        |        |           |
| O43156                                                                                                          | K.ALVGLVNDESPEIQACNK.V    | 2028.0066 | 2 | 2.3052 | 0.0827 | 0.66      |
| <b><i>Protein KIAA0841</i></b>                                                                                  |                           |           |   |        |        |           |
| O94927                                                                                                          | K.LELEAAVTRLR[.A          | 1274.7558 | 2 | 2.3829 | 0.0988 | 3.39      |
| <b><i>Protein KIAA1045</i></b>                                                                                  |                           |           |   |        |        |           |
| Q9UPV7                                                                                                          | K.EAEAGTSVVQEESAGRAAWER.L | 2320.08   | 2 | 2.7614 | 0.2753 | 0.10      |
| <b><i>Protein KIAA1849</i></b>                                                                                  |                           |           |   |        |        |           |

| Acc #                                                                                                           | Peptide                 | MH+       | z | XC     | DCN    | H/L ratio |
|-----------------------------------------------------------------------------------------------------------------|-------------------------|-----------|---|--------|--------|-----------|
| Q96JH8                                                                                                          | K.RQSPLLSSMLSRRTLSYK.Y  | 1998.0801 | 2 | 2.4674 | 0.1863 | 1.34      |
| <b><i>Protein kinase C, epsilon type (EC 2.7.1.-) (nPKC-epsilon)</i></b>                                        |                         |           |   |        |        |           |
| Q02156                                                                                                          | K.RCHELIITKCAGLK.K      | 1584.8713 | 2 | 2.6171 | 0.2296 | 0.21      |
| <b><i>Protein kinase, D1 type (EC 2.7.1.-) (nPKC-D1) (Protein kinase D) (Protein kinase C, mu type)</i></b>     |                         |           |   |        |        |           |
| Q15139                                                                                                          | K.EISHEAIDLINLLQVKMR].K | 2240.2198 | 2 | 3.0606 | 0.13   | 10.13     |
| <b><i>Protein LYRIC (Lysine-rich CEACAM1 co-isolated protein) (3D3/lyric) (Metastasis adhesion protein)</i></b> |                         |           |   |        |        |           |
| Q86UE4                                                                                                          | K.QGEDNSTAQDTEELEK.E    | 1793.7672 | 2 | 4.2338 | 0.4873 | 0.79      |
| <b><i>Protein transport protein Sec61 alpha subunit isoform 1 (Sec61 alpha-1)</i></b>                           |                         |           |   |        |        |           |
| P61619                                                                                                          | K.AFSPTTVNTGR.G         | 1150.5851 | 2 | 2.2888 | 0.4432 | 0.38      |
| P61619                                                                                                          | R.GQYNTYPIK.L           | 1083.5469 | 2 | 2.7349 | 0.4982 | 0.16      |
| P61619                                                                                                          | R.GQYNTYPIK.L           | 1083.5469 | 1 | 1.9608 | 0.2614 | 0.15      |
| <b><i>Protein transport protein Sec61 beta subunit</i></b>                                                      |                         |           |   |        |        |           |
| P60468                                                                                                          | -.PGTPSGTNGVSSGR.S      | 1370.6659 | 1 | 3.0787 | 0.4558 | 0.28      |
| P60468                                                                                                          | -.PGTPSGTNGVSSGR.S      | 1370.6659 | 2 | 3.4054 | 0.5391 | 0.07      |
| P60468                                                                                                          | R.FYTEDSPGLK.V          | 1156.5521 | 2 | 2.6953 | 0.4152 | 0.31      |
| P60468                                                                                                          | R.FYTEDSPGLK.V          | 1156.5521 | 1 | 1.9679 | 0.4198 | 0.21      |
| P60468                                                                                                          | R.FYTEDSPGLK.V          | 1156.5521 | 1 | 1.9888 | 0.2349 | 0.21      |
| P60468                                                                                                          | -.PGTPSGTNGVSSGR.S      | 1370.6659 | 2 | 3.4285 | 0.5653 | 0.16      |
| P60468                                                                                                          | R.FYTEDSPGLK.V          | 1156.5521 | 1 | 1.9776 | 0.392  | 0.24      |
| P60468                                                                                                          | -.PGTPSGTNGVSSGR].S     | 1374.6739 | 2 | 3.3124 | 0.5229 | 0.07      |
| P60468                                                                                                          | -.PGTPSGTNGVSSGR.S      | 1370.6659 | 2 | 3.3433 | 0.4605 | 0.10      |
| P60468                                                                                                          | R.FYTEDSPGLK.V          | 1156.5521 | 2 | 2.2057 | 0.3212 | 3.41      |
| P60468                                                                                                          | -.PGTPSGTNGVSSGR.S      | 1370.6659 | 2 | 3.4365 | 0.5589 | 0.12      |
| P60468                                                                                                          | R.FYTEDSPGLK.V          | 1156.5521 | 2 | 2.2895 | 0.3406 | 0.31      |
| <b><i>Protein tyrosine phosphatase-like member b (Protein tyrosine phosphatase-like (Proline instead of</i></b> |                         |           |   |        |        |           |
| Q6Y1H2                                                                                                          | R.QAGLYSISLPNK.Y        | 1290.7052 | 2 | 3.4504 | 0.4369 | 0.15      |
| <b><i>Protein-S-isoprenylcysteine O-methyltransferase (EC 2.1.1.100) (Isoprenylcysteine</i></b>                 |                         |           |   |        |        |           |
| O60725                                                                                                          | K.AAMFTAGSNFNHVVQNEK.S  | 1964.9283 | 2 | 4.3159 | 0.5319 | 0.10      |
| <b><i>Protocadherin beta 3 precursor (PCDH-beta3)</i></b>                                                       |                         |           |   |        |        |           |
| Q9Y5E6                                                                                                          | K.EKGFLIANLAK.D         | 1203.7096 | 2 | 2.3369 | 0.1367 | 0.44      |
| <b><i>Pumilio homolog 2 (Pumilio-2)</i></b>                                                                     |                         |           |   |        |        |           |
| Q8TB72                                                                                                          | R.IRGHVLPLALQMYGCR.V    | 1826.988  | 2 | 2.2556 | 0.2179 | 0.53      |
| <b><i>Putative 40-9-1 protein</i></b>                                                                           |                         |           |   |        |        |           |
| Q96QD8                                                                                                          | K.TANEGGSLLYEQLGYK].A   | 1746.8676 | 2 | 4.0876 | 0.3674 | 0.60      |

| Acc #                                                                                                     | Peptide                        | MH+       | z | XC     | DCN    | H/L ratio |
|-----------------------------------------------------------------------------------------------------------|--------------------------------|-----------|---|--------|--------|-----------|
| Q96QD8                                                                                                    | K.TANEGGSLLYEQLGYK.A           | 1742.8596 | 2 | 5.0822 | 0.5709 | 0.60      |
| Q96QD8                                                                                                    | R.FSISPDEDSSSYSSNSDFNYSYPTK[.Q | 2828.1824 | 2 | 2.6276 | 0.3312 | 3.01      |
| <b><i>Putative Polycomb group protein ASXL1 (Additional sex combs-like protein 1)</i></b>                 |                                |           |   |        |        |           |
| Q8IXJ9                                                                                                    | K.QESEQAGVAK.D                 | 1046.5113 | 2 | 2.3035 | 0.1027 | 0.11      |
| Q8IXJ9                                                                                                    | K.QESEQAGVAK.D                 | 1046.5113 | 1 | 2.0642 | 0.0918 | 0.17      |
| <b><i>Rap guanine nucleotide exchange factor 2 (PDZ domain containing guanine nucleotide exchange</i></b> |                                |           |   |        |        |           |
| Q9Y4G8                                                                                                    | K.INQGLQVPAVSLYPSRKK[.V        | 2002.1575 | 2 | 2.8228 | 0.1439 | 1.42      |
| <b><i>Ras GTPase-activating-like protein IQGAP1 (p195)</i></b>                                            |                                |           |   |        |        |           |
| P46940                                                                                                    | K.EELQSGVDAANSAQAQYQR.R        | 2064.9581 | 2 | 5.2402 | 0.6484 | 0.35      |
| <b><i>Ras-related protein Rab-10</i></b>                                                                  |                                |           |   |        |        |           |
| P61026                                                                                                    | K.SFENISK.W                    | 824.4149  | 1 | 2.0492 | 0.1262 | 0.52      |
| <b><i>Ras-related protein Rab-14</i></b>                                                                  |                                |           |   |        |        |           |
| P61106                                                                                                    | R.LTSEPQPQR[.E                 | 1059.556  | 1 | 2.3689 | 0.2533 | 0.26      |
| P61106                                                                                                    | R.LTSEPQPQR.E                  | 1055.548  | 2 | 2.4753 | 0.2133 | 2.85      |
| <b><i>Ras-related protein Rab-1A (YPT1-related protein)</i></b>                                           |                                |           |   |        |        |           |
| P62820                                                                                                    | R.MGPGATAGGAEK.S               | 1046.4935 | 1 | 2.0274 | 0.4853 | 0.44      |
| <b><i>Ras-related protein Rab-1B</i></b>                                                                  |                                |           |   |        |        |           |
| Q9H0U4                                                                                                    | R.MGPGAASGGERPMLK.I            | 1441.7216 | 2 | 2.6893 | 0.2522 | 0.17      |
| <b><i>Ras-related protein Rab-2A</i></b>                                                                  |                                |           |   |        |        |           |
| P61019                                                                                                    | K.TASNVEEAFINTAK[.E            | 1498.7515 | 2 | 4.0693 | 0.4484 | 0.72      |
| P61019                                                                                                    | K.IQEGVFDINNEANGIK.I           | 1760.8814 | 2 | 3.7215 | 0.5149 | 0.53      |
| P61019                                                                                                    | K.IQEGVFDINNEANGIK.I           | 1760.8814 | 2 | 5.2855 | 0.5888 | 0.35      |
| <b><i>Ras-related protein Rab-34 (Rab-39) (Ras-related protein Rah)</i></b>                               |                                |           |   |        |        |           |
| Q9BZG1                                                                                                    | R.INSDDSNLYLTASK.K             | 1540.7489 | 2 | 3.9536 | 0.5717 | 0.18      |
| <b><i>Ras-related protein Rab-5C (RAB5L) (L1880)</i></b>                                                  |                                |           |   |        |        |           |
| P51148                                                                                                    | R.GVDLQENNPASR.S               | 1299.6288 | 2 | 3.8066 | 0.4796 | 0.47      |
| P51148                                                                                                    | K.NEPQATGAPGR.N                | 1211.5763 | 2 | 2.989  | 0.503  | 0.29      |
| P51148                                                                                                    | R.QASPNIVIALAGNK.A             | 1395.7954 | 2 | 3.3616 | 0.6047 | 0.25      |
| P51148                                                                                                    | R.QASPNIVIALAGNK.A             | 1395.7954 | 2 | 2.5913 | 0.357  | 0.25      |
| <b><i>Ras-related protein Rab-7</i></b>                                                                   |                                |           |   |        |        |           |
| P51149                                                                                                    | R.DEFLIQASPR.D                 | 1175.6055 | 1 | 2.3641 | 0.314  | 0.47      |
| P51149                                                                                                    | R.FQSLGVAFYR.G                 | 1187.6208 | 2 | 3.6992 | 0.3001 | 0.41      |
| P51149                                                                                                    | K.TSLMNQYVVK.K                 | 1197.5932 | 1 | 1.913  | 0.2837 | 0.31      |
| P51149                                                                                                    | K.EAINVEQAFQTIAR.N             | 1589.8282 | 2 | 4.4261 | 0.5135 | 0.85      |

| Acc #                                                                                                          | Peptide                 | MH+       | z | XC     | DCN    | H/L ratio |
|----------------------------------------------------------------------------------------------------------------|-------------------------|-----------|---|--------|--------|-----------|
| P51149                                                                                                         | R.DEFLIQASPR.D          | 1175.6055 | 2 | 3.2517 | 0.2607 | 0.58      |
| P51149                                                                                                         | K.VIILGDSGVGK.T         | 1057.6252 | 2 | 2.5549 | 0.2492 | 3.46      |
| P51149                                                                                                         | K.VIILGDSGVGK.T         | 1057.6252 | 1 | 2.5475 | 0.4624 | 2.72      |
| P51149                                                                                                         | K.ATIGADFLTK.E          | 1036.5673 | 1 | 1.9632 | 0.3095 | 0.36      |
| P51149                                                                                                         | K.ATIGADFLTK.E          | 1036.5673 | 2 | 2.3056 | 0.4205 | 0.30      |
| P51149                                                                                                         | K.NNIPYFETSAK.E         | 1283.6266 | 2 | 2.3917 | 0.2554 | 1.54      |
| P51149                                                                                                         | R.DEFLIQASPR.D          | 1175.6055 | 2 | 2.8781 | 0.2266 | 0.58      |
| P51149                                                                                                         | R.LVTMQIWDTAGQER.F      | 1647.8159 | 2 | 4.3503 | 0.4718 | 2.46      |
| P51149                                                                                                         | K.TSLMNQYVVK.I          | 1201.6012 | 2 | 2.5096 | 0.2164 | 0.20      |
| P51149                                                                                                         | K.NNIPYFETSAK.E         | 1287.6346 | 2 | 2.5455 | 0.2408 | 1.54      |
| P51149                                                                                                         | K.TSLMNQYVVK.K          | 1197.5932 | 2 | 3.6566 | 0.5775 | 0.20      |
| P51149                                                                                                         | R.DPENFPFVVLGNK.I       | 1475.7529 | 2 | 4.089  | 0.5257 | 0.36      |
| P51149                                                                                                         | K.QETEVELYNEFPEPIK.L    | 1964.9488 | 2 | 4.6438 | 0.5416 | 0.25      |
| <b><i>Ras-related protein Rab-8A (Oncogene c-mel)</i></b>                                                      |                         |           |   |        |        |           |
| P61006                                                                                                         | K.KLEGNSPQGSNQGK.I      | 1542.7871 | 2 | 4.9805 | 0.5607 | 0.51      |
| P61006                                                                                                         | K.LEGNSPQGSNQGK.I       | 1414.6921 | 1 | 2.5717 | 0.5383 | 0.33      |
| <b><i>Ras-related protein Rab-9A (Rab-9)</i></b>                                                               |                         |           |   |        |        |           |
| P51151                                                                                                         | K.EPESFPFVILGNK.I       | 1476.7733 | 2 | 2.7072 | 0.4167 | 0.23      |
| <b><i>Relaxin-like factor b</i></b>                                                                            |                         |           |   |        |        |           |
| Q6YNB5                                                                                                         | R.WDLACSPCPR.P          | 1147.5023 | 1 | 2.2258 | 0.1692 | 0.12      |
| <b><i>Retinoblastoma binding protein 2 homolog 1</i></b>                                                       |                         |           |   |        |        |           |
| O95811                                                                                                         | K.LLSPLQDVIKIC*LC*R.K   | 1943.0453 | 2 | 2.258  | 0.1567 | 0.10      |
| <b><i>Retinoic acid-induced protein 3 (G-protein coupled receptor family C group 5 member A) (Retinoic</i></b> |                         |           |   |        |        |           |
| Q8NFJ5                                                                                                         | R.TNVNVFSELSAPR.R       | 1433.7383 | 2 | 2.9327 | 0.5327 | 0.89      |
| Q8NFJ5                                                                                                         | R.TNVNVFSELSAPR.R       | 1433.7383 | 2 | 3.6815 | 0.6224 | 1.44      |
| Q8NFJ5                                                                                                         | R.TNVNVFSELSAPR.R       | 1437.7463 | 2 | 3.3654 | 0.3187 | 1.44      |
| Q8NFJ5                                                                                                         | R.NPMDYPVEDAFC*KPQLVK.K | 2155.0329 | 2 | 3.4195 | 0.2767 | 0.54      |
| Q8NFJ5                                                                                                         | K.DYEVK.K               | 657.3221  | 1 | 1.9518 | 0.1645 | 0.26      |
| Q8NFJ5                                                                                                         | R.TNVNVFSELSAPR.R       | 1437.7463 | 2 | 4.6092 | 0.4187 | 0.78      |
| Q8NFJ5                                                                                                         | R.TNVNVFSELSAPR.R       | 1433.7383 | 2 | 3.6096 | 0.6229 | 0.90      |
| Q8NFJ5                                                                                                         | R.TNVNVFSELSAPR.R       | 1437.7463 | 2 | 3.3555 | 0.3313 | 0.90      |
| Q8NFJ5                                                                                                         | R.TNVNVFSELSAPR.R       | 1433.7383 | 2 | 4.0441 | 0.621  | 0.78      |
| Q8NFJ5                                                                                                         | R.NPMDYPVEDAFC*KPQLVK.K | 2151.0249 | 2 | 4.4846 | 0.6699 | 0.54      |
| Q8NFJ5                                                                                                         | R.TNVNVFSELSAPR.R       | 1433.7383 | 1 | 2.9327 | 0.4088 | 0.45      |
| Q8NFJ5                                                                                                         | R.TNVNVFSELSAPR.R       | 1433.7383 | 1 | 2.3065 | 0.2831 | 0.45      |

| Acc #                                                                                                        | Peptide                  | MH+       | z | XC     | DCN    | H/L ratio |
|--------------------------------------------------------------------------------------------------------------|--------------------------|-----------|---|--------|--------|-----------|
| <b><i>Rhophilin-2 (GTP-Rho binding protein 2) (76 kDa RhoB effector protein) (p76RBE)</i></b>                |                          |           |   |        |        |           |
| Q8IU4                                                                                                        | R.AMAHHEESVREASLC*K.K    | 1854.8585 | 2 | 2.49   | 0.3106 | 0.04      |
| <b><i>Rho-related GTP-binding protein RhoG</i></b>                                                           |                          |           |   |        |        |           |
| P84095                                                                                                       | K.EYIPTVFDNYSQAQSAVDGR.T | 2131.9931 | 2 | 4.6037 | 0.6646 | 0.53      |
| <b><i>Ribosome-binding protein 1 (Ribosome receptor protein) (180 kDa ribosome receptor homolog)</i></b>     |                          |           |   |        |        |           |
| Q9P2E9                                                                                                       | R.DAQDVQASQAEADQQQTR.L   | 1988.8904 | 2 | 6.1558 | 0.6401 | 0.80      |
| <b><i>RNA-binding protein 28 (RNA-binding motif protein 28)</i></b>                                          |                          |           |   |        |        |           |
| Q9NW13                                                                                                       | K.C*LLAASPEAGGLKLDGR.Q   | 1970.9964 | 2 | 2.3755 | 0.1999 | 0.15      |
| <b><i>RNA-binding protein with serine-rich domain 1 (SR-related protein LDC2)</i></b>                        |                          |           |   |        |        |           |
| Q15287                                                                                                       | K.GYAYVEFENPDEAEK.A      | 1760.765  | 2 | 4.9327 | 0.698  | 0.28      |
| <b><i>RPS27L protein</i></b>                                                                                 |                          |           |   |        |        |           |
| Q49A11                                                                                                       | R.DLLHPSLEEEK.K          | 1309.6634 | 2 | 2.7603 | 0.3206 | 0.13      |
| <b><i>Ryanodine receptor 3 (Brain-type ryanodine receptor) (RyR3) (RYR-3) (Brain ryanodine receptor-</i></b> |                          |           |   |        |        |           |
| Q15413                                                                                                       | K.MSKAMQVKSGGQDQER.K     | 1779.8476 | 2 | 2.3961 | 0.1763 | 0.16      |
| Q15413                                                                                                       | K.KYDPLFR.M              | 1053.5364 | 2 | 2.2301 | 0.0896 | 2.05      |
| <b><i>Sarcoplasmic/endoplasmic reticulum calcium ATPase 2 (EC 3.6.3.8) (Calcium pump 2) (SERCA2)</i></b>     |                          |           |   |        |        |           |
| P16615                                                                                                       | K.MNVFDTLTK.G            | 1096.5343 | 2 | 2.9439 | 0.484  | 0.07      |
| P16615                                                                                                       | R.IGIFGQDEDVTSK.A        | 1408.6955 | 2 | 4.0796 | 0.4391 | 0.30      |
| P16615                                                                                                       | R.IGIFGQDEDVTSK.A        | 1408.6955 | 2 | 3.3442 | 0.4091 | 0.30      |
| P16615                                                                                                       | K.VPMTSGVK.Q             | 818.4441  | 1 | 1.9945 | 0.3089 | 0.21      |
| P16615                                                                                                       | K.MNVFDTLTK.G            | 1096.5343 | 1 | 2.2954 | 0.3004 | 0.11      |
| P16615                                                                                                       | R.EEMHLED SANFIK.Y       | 1566.7235 | 2 | 2.6852 | 0.2799 | 0.36      |
| P16615                                                                                                       | K.MNVFDTLTK.G            | 1096.5343 | 1 | 2.2648 | 0.1448 | 0.11      |
| P16615                                                                                                       | R.IEVASSVK.L             | 832.4775  | 1 | 1.936  | 0.3427 | 0.24      |
| P16615                                                                                                       | K.MNVFDTLTK.G            | 1096.5343 | 1 | 2.093  | 0.2946 | 0.18      |
| P16615                                                                                                       | R.IEVASSVK.L             | 832.4775  | 1 | 1.9244 | 0.3076 | 1.96      |
| P16615                                                                                                       | R.IGIFGQDEDVTSK.A        | 1408.6955 | 2 | 3.7225 | 0.3969 | 0.46      |
| P16615                                                                                                       | R.NYLEPGK.E              | 820.4199  | 1 | 1.9865 | 0.2055 | 0.19      |
| P16615                                                                                                       | R.EFDELNPSAQR.D          | 1309.615  | 2 | 3.4506 | 0.3085 | 0.35      |
| P16615                                                                                                       | R.EFDELNPSAQR.D          | 1305.607  | 2 | 3.8361 | 0.4376 | 0.35      |
| P16615                                                                                                       | R.EEMHLED SANFIK.Y       | 1562.7155 | 2 | 3.4928 | 0.542  | 0.36      |
| P16615                                                                                                       | R.IGIFGQDEDVTSK.A        | 1408.6955 | 2 | 3.816  | 0.4192 | 0.29      |
| P16615                                                                                                       | R.DEMVATEQER.T           | 1207.5259 | 2 | 3.1359 | 0.4912 | 0.63      |
| P16615                                                                                                       | R.EFDELNPSAQR.D          | 1305.607  | 2 | 3.6777 | 0.4293 | 0.52      |

| Acc #                                                                                                             | Peptide                      | MH+       | z | XC     | DCN    | H/L ratio |
|-------------------------------------------------------------------------------------------------------------------|------------------------------|-----------|---|--------|--------|-----------|
| <b><i>Scavenger receptor class B member 1 (SRB1) (SR-BI) (CD36 antigen-like 1) (CD36 and LIMPII)</i></b>          |                              |           |   |        |        |           |
| Q8WTV0                                                                                                            | K.SVAGIGQTGK.I               | 921.5131  | 1 | 1.9482 | 0.1622 | 0.39      |
| Q8WTV0                                                                                                            | K.SVAGIGQTGK.I               | 917.5051  | 1 | 2.1506 | 0.4401 | 0.39      |
| Q8WTV0                                                                                                            | K.SVAGIGQTGK.I               | 917.5051  | 1 | 2.001  | 0.278  | 0.56      |
| <b><i>SCO1 protein homolog, mitochondrial precursor</i></b>                                                       |                              |           |   |        |        |           |
| O75880                                                                                                            | R.EEVDQVAR.A                 | 949.4716  | 1 | 2.3991 | 0.234  | 0.55      |
| <b><i>Secretory carrier membrane protein 3</i></b>                                                                |                              |           |   |        |        |           |
| Q4VX17                                                                                                            | R.QYATLDVYNPFETR.E           | 1716.8228 | 2 | 4.261  | 0.5863 | 0.30      |
| <b><i>Separin (EC 3.4.22.49) (Separase) (Caspase-like protein ESPL1) (Extra spindle poles-like 1 protein)</i></b> |                              |           |   |        |        |           |
| Q14674                                                                                                            | R.DQLLDDK.A                  | 846.4203  | 1 | 1.9929 | 0.1945 | 0.36      |
| <b><i>Sequestosome-1 (Phosphotyrosine-independent ligand for the Lck SH2 domain of 62 kDa)</i></b>                |                              |           |   |        |        |           |
| Q13501                                                                                                            | R.PGPTAESASGPSEDPSVNFLK.N    | 2086.9928 | 2 | 5.358  | 0.6261 | 0.68      |
| Q13501                                                                                                            | R.PGPTAESASGPSEDPSVNFLK.N    | 2091.0008 | 2 | 5.013  | 0.4873 | 0.68      |
| <b><i>Serpin B10 (Bomapin) (Protease inhibitor 10)</i></b>                                                        |                              |           |   |        |        |           |
| P48595                                                                                                            | R.IRVPSIEFNANHPFLFFIR.H      | 2317.2604 | 2 | 2.2109 | 0.2243 | 0.44      |
| <b><i>SH3-binding kinase</i></b>                                                                                  |                              |           |   |        |        |           |
| Q52WX2                                                                                                            | R.EVSITNSLSSSPFIK.V          | 1721.932  | 2 | 2.4752 | 0.1393 | 0.18      |
| <b><i>Sideroflexin-1 (Tricarboxylate carrier protein) (TCC)</i></b>                                               |                              |           |   |        |        |           |
| Q9H9B4                                                                                                            | R.NILLTNEQLESAR.K            | 1504.8096 | 2 | 3.3519 | 0.1907 | 1.27      |
| Q9H9B4                                                                                                            | K.VGIPVTDENGNR.L             | 1270.6386 | 2 | 2.5311 | 0.4249 | 0.78      |
| Q9H9B4                                                                                                            | R.NILLTNEQLESAR.K            | 1504.8096 | 2 | 3.3106 | 0.2709 | 0.99      |
| Q9H9B4                                                                                                            | K.SSMSVTSLEAELQAK.I          | 1580.7836 | 2 | 3.1573 | 0.4974 | 0.40      |
| Q9H9B4                                                                                                            | K.QAITQVVVSR.I               | 1100.6422 | 1 | 2.0145 | 0.1818 | 0.22      |
| Q9H9B4                                                                                                            | R.NILLTNEQLESAR.K            | 1500.8016 | 2 | 4.3144 | 0.5801 | 0.99      |
| <b><i>Signal peptidase complex subunit 1 (EC 3.4.-.-) (Microsomal signal peptidase 12 kDa subunit)</i></b>        |                              |           |   |        |        |           |
| Q9Y6A9                                                                                                            | K.WLPVQESSTDDK.K             | 1404.6642 | 2 | 3.0364 | 0.5333 | 0.16      |
| <b><i>Signal peptidase complex subunit 2 (EC 3.4.-.-) (Microsomal signal peptidase 25 kDa subunit)</i></b>        |                              |           |   |        |        |           |
| Q15005                                                                                                            | R.SGGSGGC*SGAGGASNC*GTGSGR.S | 1861.7279 | 2 | 4.773  | 0.5789 | 0.43      |
| Q15005                                                                                                            | R.SGGSGGC*SGAGGASNC*GTGSGR.S | 1857.7199 | 2 | 2.906  | 0.6059 | 0.39      |
| Q15005                                                                                                            | R.SGGSGGC*SGAGGASNC*GTGSGR.S | 1861.7279 | 2 | 3.8085 | 0.5425 | 0.84      |
| Q15005                                                                                                            | K.NSLDDSAK.K                 | 849.3949  | 1 | 2.1771 | 0.2974 | 0.22      |
| Q15005                                                                                                            | R.SGGSGGC*SGAGGASNC*GTGSGR.S | 1861.7279 | 2 | 4.416  | 0.5611 | 0.39      |
| Q15005                                                                                                            | R.SGGSGGC*SGAGGASNC*GTGSGR.S | 1857.7199 | 2 | 4.5643 | 0.7219 | 0.43      |
| <b><i>Signal peptidase complex subunit 3 (EC 3.4.-.-) (Microsomal signal peptidase 23 kDa subunit)</i></b>        |                              |           |   |        |        |           |

| Acc #                                                                                                   | Peptide                  | MH+       | z | XC     | DCN    | H/L ratio |
|---------------------------------------------------------------------------------------------------------|--------------------------|-----------|---|--------|--------|-----------|
| P61009                                                                                                  | K.NVEDFTGPR.E            | 1034.4901 | 1 | 2.2725 | 0.4021 | 0.29      |
| P61009                                                                                                  | K.NVEDFTGPR.E            | 1034.4901 | 1 | 2.3486 | 0.302  | 0.40      |
| P61009                                                                                                  | K.NVEDFTGPR.E            | 1034.4901 | 1 | 2.4113 | 0.2531 | 0.19      |
| P61009                                                                                                  | K.NNALNQVVLWDK.I         | 1413.7485 | 2 | 3.7133 | 0.5417 | 0.69      |
| P61009                                                                                                  | K.YFFFDDGNLKG.G          | 1322.6052 | 2 | 3.0908 | 0.536  | 0.11      |
| <b>Signal recognition particle receptor beta subunit (SR-beta) (Protein APMCF1)</b>                     |                          |           |   |        |        |           |
| Q9Y5M8                                                                                                  | R.DTQTSITDSC*AVYR.V      | 1616.7221 | 2 | 3.2276 | 0.5349 | 0.35      |
| Q9Y5M8                                                                                                  | R.VADGGGAGGTFQPYLDTLR.Q  | 1894.9294 | 2 | 5.1032 | 0.635  | 0.42      |
| Q9Y5M8                                                                                                  | R.DTQTSITDSC*AVYR.V      | 1616.7221 | 2 | 3.6173 | 0.5231 | 0.35      |
| Q9Y5M8                                                                                                  | R.SAAPSTLDSSTAPAQLGK.K   | 1788.8974 | 2 | 4.3914 | 0.5684 | 0.18      |
| <b>Signal transducer and activator of transcription 3 (Acute-phase response factor)</b>                 |                          |           |   |        |        |           |
| P40763                                                                                                  | R.IVELFRNLMK.S           | 1262.7289 | 2 | 2.2679 | 0.1517 | 0.14      |
| P40763                                                                                                  | R.IVELFRNLMK.S           | 1262.7289 | 2 | 2.2298 | 0.2362 | 0.22      |
| <b>Similar to flotillin 2</b>                                                                           |                          |           |   |        |        |           |
| Q9BTI6                                                                                                  | K.IGEAATVIEAMGK.A        | 1418.7196 | 2 | 4.0903 | 0.651  | 0.38      |
| <b>Similar to mouse 150009M05Rik protein</b>                                                            |                          |           |   |        |        |           |
| Q8N5K1                                                                                                  | K.DSLINLK.I              | 802.4669  | 1 | 1.9142 | 0.1539 | 0.44      |
| Q8N5K1                                                                                                  | R.LPVPESITGFAR.L         | 1286.7103 | 2 | 2.8836 | 0.3982 | 0.23      |
| Q8N5K1                                                                                                  | K.VVNEINIEDLC*LTK.A      | 1659.8622 | 2 | 4.8576 | 0.4728 | 0.82      |
| Q8N5K1                                                                                                  | R.LPVPESITGFAR.L         | 1286.7103 | 2 | 3.1818 | 0.4103 | 0.20      |
| <b>Single-stranded DNA-binding protein, mitochondrial precursor (Mt-SSB) (MtSSB) (PWPI-</b>             |                          |           |   |        |        |           |
| Q04837                                                                                                  | R.SGDSEVYQLGDVSQK.T      | 1611.7497 | 2 | 4.7945 | 0.5378 | 0.68      |
| <b>Small glutamine-rich tetratricopeptide repeat-containing protein B (Small glutamine-rich protein</b> |                          |           |   |        |        |           |
| Q96EQ0                                                                                                  | K.FEEAVTSYQK.A           | 1201.5735 | 1 | 2.2316 | 0.195  | 0.64      |
| <b>Small proline-rich protein 4</b>                                                                     |                          |           |   |        |        |           |
| Q96P11                                                                                                  | K.QPC*QPPPVKCQETCAPK.T   | 1910.8921 | 2 | 2.2662 | 0.1833 | 0.16      |
| <b>Sodium/potassium-transporting ATPase alpha-1 chain precursor (EC 3.6.3.9) (Sodium pump 1)</b>        |                          |           |   |        |        |           |
| P05023                                                                                                  | K.IVEIPFNSTNK.Y          | 1261.6787 | 2 | 2.3357 | 0.3432 | 0.23      |
| P05023                                                                                                  | R.AVFQANQENLPILK.R       | 1584.8744 | 2 | 3.3275 | 0.4025 | 0.30      |
| P05023                                                                                                  | R.SPFTNENPLETR].N        | 1523.7103 | 2 | 3.7079 | 0.451  | 0.65      |
| P05023                                                                                                  | R.SPFTNENPLETR.N         | 1519.7023 | 2 | 4.3618 | 0.6122 | 0.65      |
| <b>Sodium/potassium-transporting ATPase beta-2 chain (Sodium/potassium-dependent ATPase beta-2</b>      |                          |           |   |        |        |           |
| P14415                                                                                                  | K.FLEPYNDSMQAQKNDVC*R].P | 2218.9987 | 2 | 2.889  | 0.1852 | 0.09      |
| <b>Sodium/potassium-transporting ATPase beta-3 chain (Sodium/potassium-dependent ATPase beta-3</b>      |                          |           |   |        |        |           |

| Acc #                                                                                                             | Peptide               | MH+       | z | XC     | DCN    | H/L ratio |
|-------------------------------------------------------------------------------------------------------------------|-----------------------|-----------|---|--------|--------|-----------|
| P54709                                                                                                            | K.LFIYNPTTGEFLGR.T    | 1627.8479 | 2 | 4.5382 | 0.5445 | 0.40      |
| P54709                                                                                                            | R.IIGLKPEGVPR.I       | 1178.7256 | 2 | 2.52   | 0.4084 | 0.12      |
| <b><i>Sodium-dependent multivitamin transporter (Na(+)-dependent multivitamin transporter)</i></b>                |                       |           |   |        |        |           |
| Q9Y289                                                                                                            | R.ISGFELDPDFVR.H      | 1491.7478 | 2 | 3.6018 | 0.5006 | 0.36      |
| Q9Y289                                                                                                            | R.SLNPATIYPVLPK.L     | 1412.8148 | 2 | 3.0861 | 0.532  | 0.76      |
| <b><i>Solute carrier family 2, facilitated glucose transporter member 1 (Glucose transporter type 1,</i></b>      |                       |           |   |        |        |           |
| P11166                                                                                                            | R.TFDEIASGFR.Q        | 1142.5477 | 2 | 2.6797 | 0.4569 | 0.46      |
| P11166                                                                                                            | R.TFDEIASGFR.Q        | 1142.5477 | 2 | 2.8181 | 0.5223 | 0.77      |
| <b><i>Solute carrier family 25 member 24, isoform 1</i></b>                                                       |                       |           |   |        |        |           |
| Q6NUK1                                                                                                            | R.NLGIPLGQDAEEK.I     | 1383.7114 | 2 | 2.2129 | 0.3718 | 0.23      |
| <b><i>Sorting and assembly machinery component 50 homolog</i></b>                                                 |                       |           |   |        |        |           |
| Q9Y512                                                                                                            | R.FYLGGPSTSVR.G       | 1096.5786 | 2 | 2.33   | 0.4691 | 0.21      |
| Q9Y512                                                                                                            | K.VNQELAGYTGGDVFSIK.E | 1797.9018 | 2 | 5.748  | 0.7144 | 1.23      |
| Q9Y512                                                                                                            | R.FYLGGPSTSVR.G       | 1096.5786 | 2 | 2.8414 | 0.3953 | 0.21      |
| Q9Y512                                                                                                            | K.NLIEVMR.K           | 874.4815  | 1 | 2.1447 | 0.1344 | 0.46      |
| Q9Y512                                                                                                            | R.NSSILPR.R           | 786.4468  | 1 | 2.2509 | 0.0813 | 0.48      |
| Q9Y512                                                                                                            | K.QEILENK.D           | 873.4676  | 1 | 2.4487 | 0.1935 | 0.16      |
| Q9Y512                                                                                                            | K.VTGQFPWSSLR.E       | 1277.6637 | 2 | 4.0182 | 0.4287 | 0.35      |
| Q9Y512                                                                                                            | R.NSSILPR.R           | 786.4468  | 1 | 2.2391 | 0.1429 | 0.39      |
| Q9Y512                                                                                                            | R.FYLGGPSTSVR.G       | 1096.5786 | 2 | 2.5947 | 0.485  | 0.21      |
| Q9Y512                                                                                                            | K.VTGQFPWSSLR.E       | 1277.6637 | 2 | 3.2121 | 0.396  | 0.35      |
| <b><i>Source of immunodominant MHC-associated peptides</i></b>                                                    |                       |           |   |        |        |           |
| Q8TCJ2                                                                                                            | R.ESDYFTPQGEFR.V      | 1475.6437 | 2 | 2.5973 | 0.4507 | 0.50      |
| Q8TCJ2                                                                                                            | R.ESDYFTPQGEFR.V      | 1479.6517 | 2 | 2.6445 | 0.417  | 0.50      |
| Q8TCJ2                                                                                                            | R.NQGPLYDK.A          | 951.453   | 1 | 2.0326 | 0.24   | 0.05      |
| Q8TCJ2                                                                                                            | R.ENPPVEDSSDEDDK.R    | 1575.6293 | 2 | 2.338  | 0.4462 | 0.47      |
| Q8TCJ2                                                                                                            | R.ENPPVEDSSDEDDKR.N   | 1731.7304 | 2 | 3.4646 | 0.5706 | 0.56      |
| Q8TCJ2                                                                                                            | R.NQGPLYDK.A          | 951.453   | 1 | 1.9164 | 0.1768 | 0.02      |
| <b><i>Spectrin alpha chain, brain (Spectrin, non-erythroid alpha chain) (Alpha-II spectrin) (Fodrin alpha</i></b> |                       |           |   |        |        |           |
| Q13813                                                                                                            | R.EANQQQFNR.N         | 1262.5872 | 1 | 2.0913 | 0.2975 | 0.32      |
| Q13813                                                                                                            | K.VNSLGETAER.L        | 1075.5378 | 2 | 2.8152 | 0.4563 | 0.40      |
| Q13813                                                                                                            | R.DLAALGDK.V          | 802.4305  | 1 | 2.1979 | 0.2735 | 0.87      |
| Q13813                                                                                                            | K.VLETAEDIQER.R       | 1302.6536 | 2 | 3.2176 | 0.5554 | 0.04      |
| Q13813                                                                                                            | K.ITALDEFATK.L        | 1108.5885 | 2 | 2.8048 | 0.3662 | 0.40      |
| Q13813                                                                                                            | K.LGESQTLQQFSR.D      | 1393.707  | 2 | 3.7406 | 0.5211 | 0.20      |



| Acc #                                                                                                             | Peptide                 | MH+       | z | XC     | DCN    | H/L ratio |
|-------------------------------------------------------------------------------------------------------------------|-------------------------|-----------|---|--------|--------|-----------|
| Q13813                                                                                                            | K.LQTASDESYKDPTNIQSK.H  | 2024.9771 | 2 | 5.0244 | 0.6586 | 0.39      |
| Q13813                                                                                                            | K.DLTNVQNLQK.K          | 1172.627  | 2 | 3.3978 | 0.3531 | 0.29      |
| Q13813                                                                                                            | K.LQTASDESYKDPTNIQSK[H  | 2028.9851 | 2 | 3.7674 | 0.4615 | 0.39      |
| Q13813                                                                                                            | K.AINVQEEK.I            | 930.4891  | 1 | 2.1849 | 0.2852 | 0.64      |
| Q13813                                                                                                            | R.QEQIDNQTR.I           | 1131.5389 | 2 | 2.4436 | 0.1569 | 0.13      |
| Q13813                                                                                                            | K.DLTNVQNLQK[K.K        | 1176.635  | 2 | 2.4484 | 0.1226 | 0.29      |
| Q13813                                                                                                            | K.AINVQEEK.I            | 930.4891  | 1 | 2.1487 | 0.2573 | 2.35      |
| Q13813                                                                                                            | K.VLETAEDIQER.R         | 1302.6536 | 2 | 3.6464 | 0.525  | 0.04      |
| Q13813                                                                                                            | K.LQIASDENYKDPTNLQGK.L  | 2034.0138 | 2 | 5.3698 | 0.5338 | 0.70      |
| Q13813                                                                                                            | K.DLTNVQNLQK.K          | 1172.627  | 1 | 2.1133 | 0.3127 | 0.30      |
| Q13813                                                                                                            | K.LLEAQSHFR[K.K         | 1104.5927 | 2 | 2.7204 | 0.1914 | 1.21      |
| Q13813                                                                                                            | R.DLAALEDK.V            | 874.4516  | 1 | 2.4599 | 0.4036 | 0.31      |
| Q13813                                                                                                            | R.DLAALGDK.V            | 802.4305  | 1 | 2.6729 | 0.2786 | 0.10      |
| Q13813                                                                                                            | K.KGDILTLLNSTNK.D       | 1416.8057 | 2 | 4.3926 | 0.5955 | 0.22      |
| Q13813                                                                                                            | R.SQLLGSAAHEVQR.F       | 1324.6968 | 2 | 3.4134 | 0.4658 | 0.26      |
| Q13813                                                                                                            | K.VLETAEDIQER.R         | 1302.6536 | 2 | 3.7843 | 0.5934 | 0.05      |
| Q13813                                                                                                            | R.QQVAPTDDDETGK.E       | 1288.6016 | 2 | 2.292  | 0.4175 | 0.53      |
| Q13813                                                                                                            | R.DLSSVQTLTK.Q          | 1204.6783 | 2 | 3.0673 | 0.4858 | 0.20      |
| Q13813                                                                                                            | K.DLASVNNLLK.K          | 1086.6153 | 2 | 2.4377 | 0.4062 | 0.68      |
| Q13813                                                                                                            | K.GRELPTAFDYVEFTR.S     | 1800.8915 | 2 | 2.4411 | 0.3508 | 0.29      |
| <b><i>Spectrin beta chain, brain 1 (Spectrin, non-erythroid beta chain 1) (Beta-II spectrin) (Fodrin beta</i></b> |                         |           |   |        |        |           |
| Q01082                                                                                                            | R.AQTLPTSVVTITSESPGK.R  | 1903.0019 | 2 | 4.9402 | 0.7293 | 0.31      |
| Q01082                                                                                                            | K.TALPAQSAATLPAR.T      | 1367.7641 | 1 | 2.4248 | 0.494  | 0.27      |
| <b><i>SPFH domain protein 1 precursor (Protein KE04)</i></b>                                                      |                         |           |   |        |        |           |
| O75477                                                                                                            | K.EALEPSGENVIQNK.E      | 1527.7649 | 2 | 3.5772 | 0.4748 | 0.98      |
| <b><i>SPFH domain protein 2 precursor</i></b>                                                                     |                         |           |   |        |        |           |
| O94905                                                                                                            | K.LSFGLEDEPLETATK[E     | 1653.8349 | 2 | 4.0814 | 0.3665 | 0.34      |
| O94905                                                                                                            | K.LSFGLEDEPLETATK[E     | 1653.8349 | 2 | 4.4545 | 0.3226 | 0.49      |
| O94905                                                                                                            | K.LSFGLEDEPLETATK.E     | 1649.8269 | 2 | 5.4623 | 0.5881 | 0.34      |
| O94905                                                                                                            | K.LSFGLEDEPLETATK.E     | 1649.8269 | 2 | 4.6701 | 0.5606 | 0.49      |
| <b><i>Sphingosine kinase 2 (EC 2.7.1.-) (SK 2) (SPK 2)</i></b>                                                    |                         |           |   |        |        |           |
| Q9NRA0                                                                                                            | R.LLLLVPFGGRGLAWQWC*K.N | 2228.2161 | 2 | 2.5574 | 0.1128 | 0.26      |
| <b><i>Splicing coactivator subunit SRm300</i></b>                                                                 |                         |           |   |        |        |           |
| Q9UHA8                                                                                                            | R.SPVPASAFSDQSR.C       | 1277.6121 | 1 | 2.4161 | 0.4435 | 0.68      |
| Q9UHA8                                                                                                            | R.SPVPASAFSDQSR.C       | 1277.6121 | 2 | 2.459  | 0.4556 | 0.21      |

| Acc #                                                                                                          | Peptide                  | MH+       | z | XC     | DCN    | H/L ratio |
|----------------------------------------------------------------------------------------------------------------|--------------------------|-----------|---|--------|--------|-----------|
| Q9UHA8                                                                                                         | R.AAFGISDSYVDGSSFDPPQR.R | 2018.909  | 2 | 4.4317 | 0.49   | 0.64      |
| Q9UHA8                                                                                                         | R.AAFGISDSYVDGSSFDPPQR.R | 2022.917  | 2 | 4.6009 | 0.5345 | 0.64      |
| <b><i>Stabilin-1 precursor (FEEL-1 protein) (MS-1 antigen)</i></b>                                             |                          |           |   |        |        |           |
| Q9NY15                                                                                                         | R.VFLQLRVAVAMMDQGCR[E    | 1940.9998 | 2 | 2.2654 | 0.0918 | 149.47    |
| <b><i>Stanniocalcin-1 precursor (STC-1)</i></b>                                                                |                          |           |   |        |        |           |
| P52823                                                                                                         | K.SRVAQAQNSAEVVR.C       | 1386.7448 | 2 | 2.4582 | 0.1297 | 0.01      |
| <b><i>Steroid dehydrogenase homolog (Fragment)</i></b>                                                         |                          |           |   |        |        |           |
| Q53GQ0                                                                                                         | R.TIAVDFASEDIYDK.I       | 1586.7584 | 2 | 3.1431 | 0.4792 | 0.30      |
| <b><i>Stomatin-like protein 2 (SLP-2) (EPB72-like 2)</i></b>                                                   |                          |           |   |        |        |           |
| Q9UJZ1                                                                                                         | K.APVPGTDPDSLSSGSSR.D    | 1514.7445 | 2 | 3.3336 | 0.5386 | 0.52      |
| <b><i>Stress-70 protein, mitochondrial precursor (75 kDa glucose regulated protein) (GRP 75) (Peptide-</i></b> |                          |           |   |        |        |           |
| P38646                                                                                                         | K.DDIENMVK.N             | 963.4452  | 1 | 1.9977 | 0.2849 | 0.31      |
| <b><i>Supervillin (Archvillin) (p205/p250)</i></b>                                                             |                          |           |   |        |        |           |
| O95425                                                                                                         | R.SNEEEETSDDSSLEK.Q      | 1583.6555 | 2 | 4.8573 | 0.5364 | 0.75      |
| O95425                                                                                                         | R.YQTQPVTLGEVEVQVQSGK.L  | 1991.008  | 2 | 4.4792 | 0.527  | 0.17      |
| O95425                                                                                                         | K.ELAEQGEPPDSSTLSLAEK[L  | 1907.9211 | 2 | 3.5874 | 0.3986 | 0.26      |
| <b><i>Synaptic glycoprotein SC2</i></b>                                                                        |                          |           |   |        |        |           |
| Q9NZ01                                                                                                         | R.LLETLFVHR.F            | 1127.6572 | 2 | 2.9502 | 0.4137 | 0.26      |
| Q9NZ01                                                                                                         | K.DEDVLQK.L              | 846.4203  | 1 | 2.3793 | 0.3533 | 0.24      |
| Q9NZ01                                                                                                         | K.DEDVLQK.L              | 846.4203  | 1 | 2.2566 | 0.3105 | 0.72      |
| <b><i>Telomere-associated protein RIF1 (Rap1-interacting factor 1 homolog)</i></b>                             |                          |           |   |        |        |           |
| Q5UIP0                                                                                                         | K.LIVKVIYSFHLSFK.E       | 1795.0517 | 2 | 2.3727 | 0.3122 | 0.07      |
| <b><i>Tetratricopeptide repeat protein KIAA0103</i></b>                                                        |                          |           |   |        |        |           |
| Q15006                                                                                                         | R.ILQEDPTNTAAR[K         | 1332.6885 | 2 | 3.5062 | 0.2661 | 0.64      |
| Q15006                                                                                                         | R.ILQEDPTNTAAR.K         | 1328.6805 | 2 | 4.0791 | 0.4798 | 0.64      |
| Q15006                                                                                                         | R.ILQEDPTNTAAR.K         | 1328.6805 | 2 | 3.9354 | 0.4612 | 0.39      |
| <b><i>TGF-beta receptor type II precursor (EC 2.7.1.37) (TGFR-2) (TGF-beta type II receptor)</i></b>           |                          |           |   |        |        |           |
| P37173                                                                                                         | K.NDENITLETVCHDPK[L      | 1731.7985 | 2 | 2.708  | 0.1694 | 0.11      |
| P37173                                                                                                         | K.NDENITLETVCHDPK[L      | 1731.7985 | 2 | 2.7446 | 0.2058 | 0.20      |
| <b><i>THAP domain-containing protein 2</i></b>                                                                 |                          |           |   |        |        |           |
| Q9H0W7                                                                                                         | K.ILEQDQQDKTLLSLNLK.Q    | 1999.107  | 2 | 2.9009 | 0.2384 | 0.23      |
| Q9H0W7                                                                                                         | K.ILEQDQQDKTLLSLNLK.Q    | 1999.107  | 2 | 3.4072 | 0.2297 | 0.27      |
| Q9H0W7                                                                                                         | K.ILEQDQQDKTLLSLNLK.Q    | 1999.107  | 2 | 2.8931 | 0.2179 | 0.24      |
| Q9H0W7                                                                                                         | K.ILEQDQQDKTLLSLNLK.Q    | 1999.107  | 2 | 3.3653 | 0.2133 | 0.29      |

| Acc #                                                                                                              | Peptide                     | MH+       | z | XC     | DCN    | H/L ratio |
|--------------------------------------------------------------------------------------------------------------------|-----------------------------|-----------|---|--------|--------|-----------|
| Q9H0W7                                                                                                             | K.ILEQDQQDKTLLSLNLK.Q       | 1999.107  | 2 | 2.8417 | 0.2812 | 0.45      |
| <b><i>Thioredoxin domain-containing protein 1 precursor (Transmembrane Trx-related protein)</i></b>                |                             |           |   |        |        |           |
| Q9H3N1                                                                                                             | K.VDVTEQPGLSGR.F            | 1257.6434 | 2 | 4.5636 | 0.5268 | 0.30      |
| <b><i>Thioredoxin reductase 2 intronic transcript 1</i></b>                                                        |                             |           |   |        |        |           |
| Q6F5E7                                                                                                             | K.VFGQGFPSPLEEIKR[L         | 1707.9195 | 2 | 2.2273 | 0.1405 | 0.22      |
| <b><i>Thyroid hormone receptor-associated protein complex 95 kDa component (Trap95) (Thyroid hormone</i></b>       |                             |           |   |        |        |           |
| Q9Y2X0                                                                                                             | R.APGQPKIDHLRR.L            | 1387.7917 | 1 | 1.9565 | 0.1847 | 0.16      |
| <b><i>Thyroid receptor-interacting protein 11 (TRIP-11) (Golgi-associated microtubule-binding protein 210)</i></b> |                             |           |   |        |        |           |
| Q15643                                                                                                             | R.EKEFECHSMKEK.A            | 1524.6821 | 2 | 2.6467 | 0.1687 | 0.19      |
| <b><i>TNF receptor-associated factor 5 (RING finger protein 84)</i></b>                                            |                             |           |   |        |        |           |
| O00463                                                                                                             | R.FVAHSVLENAKNAYIK.D        | 1803.9752 | 2 | 2.4046 | 0.1963 | 0.27      |
| <b><i>Transcription elongation factor A (SII)-like 3 (MSTP072) (Hypothetical protein FLJ25628)</i></b>             |                             |           |   |        |        |           |
| Q969E4                                                                                                             | K.SDEEEKPDVEGKTECEGK.R      | 2008.8652 | 2 | 2.3771 | 0.1167 | 0.37      |
| <b><i>Transcription elongation factor B polypeptide 1 (RNA polymerase II transcription factor SIII)</i></b>        |                             |           |   |        |        |           |
| Q15369                                                                                                             | K.AMLSGPGQFAENETNEVNFR.E    | 2211.0135 | 2 | 2.6363 | 0.1214 | 0.46      |
| <b><i>Transcription factor 20 (Stromelysin 1 PDGF-responsive element-binding protein) (SPRE-binding</i></b>        |                             |           |   |        |        |           |
| Q9UGU0                                                                                                             | R.SASSNSAEAGGDTVTLDDILSLK[S | 2255.1016 | 2 | 3.2275 | 0.1769 | 2.37      |
| <b><i>Transcription termination factor, mitochondrial precursor (mTERF) (Mitochondrial transcription</i></b>       |                             |           |   |        |        |           |
| Q99551                                                                                                             | K.NEDLLKNLLTMGVDIDMARK.R    | 2289.1941 | 2 | 2.8265 | 0.3701 | 0.44      |
| <b><i>Transferrin receptor protein 1 (TfR1) (TR) (TfR) (Trfr) (CD71 antigen) (T9) (p90)</i></b>                    |                             |           |   |        |        |           |
| P02786                                                                                                             | R.YNSQLLSFVR.D              | 1226.6528 | 2 | 3.342  | 0.3071 | 1.42      |
| P02786                                                                                                             | R.EEPGEDFPAAR.R             | 1217.5433 | 2 | 2.3099 | 0.4627 | 0.46      |
| P02786                                                                                                             | R.SSGLPNIPVQTISR.A          | 1468.8118 | 2 | 3.9584 | 0.4588 | 1.27      |
| P02786                                                                                                             | K.DSAQNSVIIVDK.N            | 1288.6743 | 2 | 3.7757 | 0.4535 | 0.96      |
| P02786                                                                                                             | R.SSGLPNIPVQTISR[A          | 1472.8198 | 2 | 3.0067 | 0.3229 | 1.27      |
| P02786                                                                                                             | K.GFVEPDHYVVVGAQR.D         | 1672.8442 | 2 | 4.4845 | 0.5113 | 0.56      |
| P02786                                                                                                             | K.LAVDEEENADNNTK.A          | 1561.6976 | 2 | 4.3373 | 0.5761 | 0.28      |
| P02786                                                                                                             | R.YNSQLLSFVR.D              | 1226.6528 | 2 | 2.4271 | 0.2281 | 1.42      |
| P02786                                                                                                             | K.VSASPLLYTLIEK[T           | 1437.833  | 2 | 3.5023 | 0.4846 | 0.32      |
| P02786                                                                                                             | K.VSASPLLYTLIEK.T           | 1433.825  | 2 | 3.7562 | 0.6031 | 0.32      |
| P02786                                                                                                             | K.LAVDEEENADNNTK.A          | 1561.6976 | 2 | 4.7406 | 0.5471 | 0.34      |
| <b><i>Transformation/transcription domain-associated protein (350/400 kDa PCAF-associated factor)</i></b>          |                             |           |   |        |        |           |
| Q9Y4A5                                                                                                             | K.YLQFVAALTDVNTPEDETKLQ[M   | 2270.2045 | 2 | 3.2329 | 0.2754 | 0.88      |
| <b><i>Translocation associated membrane protein 1</i></b>                                                          |                             |           |   |        |        |           |

| Acc #                                                                                                             | Peptide                | MH+       | z | XC     | DCN    | H/L ratio |
|-------------------------------------------------------------------------------------------------------------------|------------------------|-----------|---|--------|--------|-----------|
| Q15629                                                                                                            | K.LDFSTGNFNVLA VR.I    | 1552.8118 | 2 | 4.1592 | 0.6036 | 0.30      |
| Q15629                                                                                                            | R.EHSAFQAPAVK].K       | 1188.6138 | 2 | 2.4652 | 0.4122 | 0.79      |
| Q15629                                                                                                            | K.LDFSTGNFNVLA VR].I   | 1556.8198 | 2 | 3.7467 | 0.2688 | 0.30      |
| Q15629                                                                                                            | K.LDFSTGNFNVLA VR.I    | 1552.8118 | 2 | 4.8019 | 0.5938 | 0.30      |
| Q15629                                                                                                            | R.EHSAFQAPAVK.K        | 1184.6058 | 2 | 2.7179 | 0.4799 | 0.79      |
| <b><i>Translocation protein SEC63 homolog</i></b>                                                                 |                        |           |   |        |        |           |
| Q9UGP8                                                                                                            | K.DATSRPTDNILIPQLIR].E | 1927.0738 | 2 | 4.2116 | 0.3845 | 2.08      |
| Q9UGP8                                                                                                            | K.DATSRPTDNILIPQLIR.E  | 1923.0658 | 2 | 3.8648 | 0.3894 | 2.08      |
| <b><i>Translocon-associated protein alpha subunit precursor (TRAP-alpha) (Signal sequence receptor)</i></b>       |                        |           |   |        |        |           |
| P43307                                                                                                            | K.GEDFPANNIVK].F       | 1207.6084 | 1 | 2.0241 | 0.2379 | 1.33      |
| <b><i>Translocon-associated protein delta subunit precursor (TRAP-delta) (Signal sequence receptor delta)</i></b> |                        |           |   |        |        |           |
| P51571                                                                                                            | R.FFDEESYSLLR.K        | 1405.6634 | 2 | 3.4382 | 0.5907 | 0.26      |
| P51571                                                                                                            | R.FFDEESYSLLR.K        | 1405.6634 | 2 | 2.6362 | 0.2989 | 0.26      |
| P51571                                                                                                            | R.FFDEESYSLLR.K        | 1405.6634 | 2 | 3.5248 | 0.5797 | 0.40      |
| P51571                                                                                                            | R.FFDEESYSLLR.K        | 1405.6634 | 2 | 4.0895 | 0.4615 | 0.40      |
| P51571                                                                                                            | R.FFDEESYSLLR.K        | 1405.6634 | 2 | 3.2839 | 0.4057 | 0.40      |
| <b><i>Translocon-associated protein gamma subunit (TRAP-gamma) (Signal sequence receptor gamma)</i></b>           |                        |           |   |        |        |           |
| Q9UNL2                                                                                                            | K.QQSEEDLLLQDFSR.N     | 1707.8184 | 2 | 4.2575 | 0.5617 | 0.14      |
| Q9UNL2                                                                                                            | K.QQSEEDLLLQDFSR.N     | 1707.8184 | 2 | 4.2119 | 0.5428 | 0.22      |
| <b><i>Transmembrane 9 superfamily protein member 2 precursor (p76)</i></b>                                        |                        |           |   |        |        |           |
| Q99805                                                                                                            | R.PSENLGQVLFGER.I      | 1445.7383 | 2 | 3.3831 | 0.4564 | 0.65      |
| <b><i>Transmembrane anchor protein 1</i></b>                                                                      |                        |           |   |        |        |           |
| P84157                                                                                                            | R.QEEEEQLDGEK.G        | 1319.5597 | 2 | 2.751  | 0.4445 | 0.69      |
| P84157                                                                                                            | R.QEEEEQLDGEK.G        | 1319.5597 | 2 | 2.4951 | 0.4104 | 0.19      |
| P84157                                                                                                            | R.QEEEEQLDGEK.G        | 1319.5597 | 2 | 2.6205 | 0.1545 | 0.19      |
| <b><i>Transmembrane emp24 domain containing protein 10 precursor (Transmembrane protein Tmp21)</i></b>            |                        |           |   |        |        |           |
| P49755                                                                                                            | R.IPDQLVILDMK.H        | 1284.7232 | 2 | 3.8634 | 0.5017 | 0.36      |
| P49755                                                                                                            | R.IPDQLVILDMK.H        | 1284.7232 | 2 | 3.8245 | 0.4835 | 0.26      |
| P49755                                                                                                            | K.NYEEIAK.V            | 866.4254  | 1 | 2.274  | 0.1579 | 0.69      |
| P49755                                                                                                            | R.LEDLSESIVNDFAYMK].K  | 1877.8968 | 2 | 3.0124 | 0.3612 | 0.74      |
| P49755                                                                                                            | R.IPDQLVILDMK.H        | 1284.7232 | 1 | 2.569  | 0.3976 | 0.03      |
| P49755                                                                                                            | K.ITDSAGHILYSK.E       | 1304.6845 | 2 | 4.2997 | 0.6456 | 0.24      |
| P49755                                                                                                            | R.LEDLSESIVNDFAYMK.K   | 1873.8888 | 2 | 4.414  | 0.6094 | 0.76      |
| P49755                                                                                                            | K.NYEEIAK.V            | 866.4254  | 1 | 2.1541 | 0.1314 | 0.50      |
| P49755                                                                                                            | R.IPDQLVILDMK.H        | 1284.7232 | 2 | 3.8301 | 0.4532 | 0.36      |

| Acc #                                                                                       | Peptide                    | MH+       | z | XC     | DCN    | H/L ratio |
|---------------------------------------------------------------------------------------------|----------------------------|-----------|---|--------|--------|-----------|
| P49755                                                                                      | K.NYEEIAK.V                | 866.4254  | 1 | 2.0762 | 0.1229 | 4.48      |
| P49755                                                                                      | R.LEDLSESIVNDFAYMK[K       | 1877.8968 | 2 | 3.9864 | 0.3694 | 0.76      |
| P49755                                                                                      | R.LEDLSESIVNDFAYMK.K       | 1873.8888 | 2 | 3.5671 | 0.5767 | 0.74      |
| P49755                                                                                      | K.NYEEIAK[V                | 870.4334  | 1 | 2.0881 | 0.089  | 0.69      |
| <b><i>Transmembrane emp24 domain containing protein 4 precursor</i></b>                     |                            |           |   |        |        |           |
| Q7Z7H5                                                                                      | R.LTSESTNQR.V              | 1035.5065 | 1 | 2.3652 | 0.2339 | 0.65      |
| Q7Z7H5                                                                                      | R.LTSESTNQR[V              | 1039.5145 | 1 | 2.1174 | 0.3237 | 0.69      |
| Q7Z7H5                                                                                      | R.LTSESTNQR.V              | 1035.5065 | 1 | 2.323  | 0.2994 | 0.69      |
| Q7Z7H5                                                                                      | R.LTSESTNQR[V              | 1039.5145 | 1 | 1.983  | 0.3048 | 0.65      |
| <b><i>Transmembrane emp24 domain containing protein 5 precursor</i></b>                     |                            |           |   |        |        |           |
| Q9Y3A6                                                                                      | R.NIQESNFDR.V              | 1122.5174 | 1 | 2.6434 | 0.3189 | 0.23      |
| <b><i>Transmembrane emp24 domain containing protein 9 precursor (Glycoprotein 25L2)</i></b> |                            |           |   |        |        |           |
| Q9BVK6                                                                                      | R.TQLYDK.Q                 | 767.3934  | 1 | 1.9252 | 0.1863 | 0.08      |
| Q9BVK6                                                                                      | R.QLVEQVEQIQK.E            | 1341.7373 | 2 | 4.2436 | 0.1543 | 0.88      |
| <b><i>Transmembrane protein 11 (Protein PMI)</i></b>                                        |                            |           |   |        |        |           |
| P17152                                                                                      | R.LGPGSSGGSAR.E            | 945.4748  | 1 | 1.974  | 0.4318 | 1.22      |
| P17152                                                                                      | R.LPLHTLTSSTPVVLR[V        | 1737.04   | 2 | 3.3827 | 0.3245 | 2.82      |
| <b><i>Transmembrane protein 33 (DB83 protein)</i></b>                                       |                            |           |   |        |        |           |
| P57088                                                                                      | R.ALLANALTSALR.L           | 1213.7263 | 2 | 3.8985 | 0.5337 | 0.58      |
| P57088                                                                                      | R.ALLANALTSALR.L           | 1213.7263 | 2 | 4.616  | 0.5403 | 0.27      |
| P57088                                                                                      | K.LSANQQNILK.F             | 1128.6371 | 2 | 2.9515 | 0.3854 | 0.76      |
| P57088                                                                                      | K.LSANQQNILK.F             | 1128.6371 | 2 | 2.8644 | 0.3869 | 0.43      |
| P57088                                                                                      | R.ALLANALTSALR.L           | 1213.7263 | 2 | 2.9714 | 0.5024 | 0.58      |
| P57088                                                                                      | R.ALLANALTSALR.L           | 1213.7263 | 2 | 4.8652 | 0.5323 | 0.27      |
| P57088                                                                                      | R.ALLANALTSALR[L           | 1217.7343 | 2 | 3.852  | 0.4742 | 0.27      |
| P57088                                                                                      | R.GSNSLPLLR.S              | 956.5524  | 2 | 2.7672 | 0.346  | 0.36      |
| <b><i>Transmembrane protein 49 (TDC1)</i></b>                                               |                            |           |   |        |        |           |
| Q96GC9                                                                                      | K.PFQEYLEAQR.Q             | 1280.627  | 2 | 3.3822 | 0.372  | 0.41      |
| <b><i>Transmembrane protein PT27 (TPA regulated locus)</i></b>                              |                            |           |   |        |        |           |
| Q9HC07                                                                                      | R.NKEPPAPAQLQPVAVQGPEPAR.V | 2647.3951 | 3 | 4.6944 | 0.5976 | 0.69      |
| Q9HC07                                                                                      | K.DEEFQR.T                 | 823.3581  | 1 | 2.0009 | 0.1065 | 0.42      |
| Q9HC07                                                                                      | K.LLNGPGDVETGTSITVPQK.K    | 1926.0178 | 2 | 4.7028 | 0.5605 | 0.27      |
| Q9HC07                                                                                      | K.LLNGPGDVETGTSITVPQK[V    | 1930.0258 | 2 | 2.9682 | 0.2141 | 0.27      |
| Q9HC07                                                                                      | K.LLNGPGDVETGTSITVPQK.K    | 1926.0178 | 2 | 3.7274 | 0.433  | 0.30      |

| Acc #                                                                                                             | Peptide                      | MH+       | z | XC     | DCN    | H/L ratio |
|-------------------------------------------------------------------------------------------------------------------|------------------------------|-----------|---|--------|--------|-----------|
| <b><i>Tricarboxylate transport protein, mitochondrial precursor (Citrate transport protein) (CTP)</i></b>         |                              |           |   |        |        |           |
| P53007                                                                                                            | K.TQLQLDER.S                 | 1002.5214 | 1 | 2.3416 | 0.2598 | 0.42      |
| P53007                                                                                                            | R.GLSSLLYGSIPK.A             | 1234.7042 | 2 | 3.3004 | 0.4493 | 0.34      |
| P53007                                                                                                            | K.FIHDQTSPNPK.Y              | 1287.6459 | 2 | 3.0615 | 0.3122 | 0.67      |
| P53007                                                                                                            | K.FIHDQTSPNPK.Y              | 1283.6379 | 2 | 3.0756 | 0.4471 | 0.67      |
| <b><i>Triggering receptor expressed on myeloid cells 5</i></b>                                                    |                              |           |   |        |        |           |
| Q8N6D1                                                                                                            | R.WDTC*KILIETR.G             | 1434.741  | 2 | 2.2087 | 0.2404 | 0.23      |
| <b><i>Tripartite motif protein 10 (RING finger protein 9) (B30-RING finger protein)</i></b>                       |                              |           |   |        |        |           |
| Q9UDY6                                                                                                            | R.YC*EIPGPDLEESPTC*PLC*K.E   | 2264.9872 | 2 | 2.3257 | 0.2602 | 0.74      |
| <b><i>Tryptophan/serine protease</i></b>                                                                          |                              |           |   |        |        |           |
| Q6UWB4                                                                                                            | K.LTKNMLCAGYKNESYDACK[G      | 2155.9952 | 2 | 2.4882 | 0.2326 | 0.68      |
| <b><i>Tubulin alpha-1 chain (Alpha-tubulin 1) (Testis-specific alpha-tubulin) (Tubulin H2-alpha)</i></b>          |                              |           |   |        |        |           |
| P68366                                                                                                            | K.TIGGGDDSFSTFFFC*ETGAGK.H   | 2067.8964 | 2 | 3.7669 | 0.6131 | 0.27      |
| P68366                                                                                                            | K.TIGGGDDSFSTFFFCETGAGK[H    | 2014.8829 | 2 | 2.6482 | 0.2167 | 0.16      |
| <b><i>Tubulin tyrosine ligase-like protein 4</i></b>                                                              |                              |           |   |        |        |           |
| Q14679                                                                                                            | K.LLRWKMSTVTPNIVK.Q          | 1786.0408 | 2 | 2.3915 | 0.1616 | 0.34      |
| <b><i>Tumor necrosis factor ligand superfamily member 4 (OX40 ligand) (OX40L) (Glycoprotein GP34)</i></b>         |                              |           |   |        |        |           |
| P23510                                                                                                            | R.VQPLEENVGNAARPRFER[N       | 2086.0919 | 2 | 2.2602 | 0.1601 | 1.83      |
| <b><i>Tumor necrosis factor receptor superfamily member 13C (B cell-activating factor receptor) (BAFF)</i></b>    |                              |           |   |        |        |           |
| Q96RJ3                                                                                                            | R.GASSAEAPDGDKDAPEPLDK.V     | 1969.8985 | 2 | 2.5893 | 0.101  | 0.65      |
| <b><i>TXNDC14 protein</i></b>                                                                                     |                              |           |   |        |        |           |
| Q561W0                                                                                                            | K.AGDNIPEEQPVASTPTTVSDGENK.K | 2456.1423 | 2 | 3.572  | 0.573  | 0.35      |
| Q561W0                                                                                                            | K.AGDNIPEEQPVASTPTTVSDGENK.K | 2456.1423 | 3 | 4.3747 | 0.3788 | 0.20      |
| Q561W0                                                                                                            | K.AGDNIPEEQPVASTPTTVSDGENK.K | 2456.1423 | 3 | 3.3276 | 0.4221 | 0.20      |
| Q561W0                                                                                                            | K.AGDNIPEEQPVASTPTTVSDGENK.K | 2456.1423 | 2 | 4.1099 | 0.6249 | 0.48      |
| Q561W0                                                                                                            | K.AGDNIPEEQPVASTPTTVSDGENK.K | 2456.1423 | 2 | 3.7205 | 0.607  | 0.40      |
| <b><i>Type I inositol-3,4-bisphosphate 4-phosphatase (EC 3.1.3.66) (Inositol polyphosphate 4-phosphatase)</i></b> |                              |           |   |        |        |           |
| Q96PE3                                                                                                            | R.LHGEGC*EDVFPC*AGSC*TSK.K   | 2110.8627 | 2 | 2.8718 | 0.334  | 0.14      |
| Q96PE3                                                                                                            | R.LHGEGC*EDVFPC*AGSC*TSK.K   | 2110.8627 | 2 | 2.343  | 0.2648 | 0.24      |
| Q96PE3                                                                                                            | R.LHGEGC*EDVFPC*AGSC*TSK.K   | 2110.8627 | 2 | 2.8263 | 0.4126 | 0.18      |
| <b><i>Type-I angiotensin II receptor-associated protein (AT1 receptor-associated protein)</i></b>                 |                              |           |   |        |        |           |
| Q6RW13                                                                                                            | R.SAYQTIDSAEAPADPFAVPEGR.S   | 2292.0779 | 2 | 2.2771 | 0.3853 | 0.94      |
| <b><i>Tyrosine-protein phosphatase, non-receptor type 1 (EC 3.1.3.48) (Protein-tyrosine phosphatase 1B)</i></b>   |                              |           |   |        |        |           |
| P18031                                                                                                            | K.DPSSVDIK.K                 | 860.436   | 1 | 2.0716 | 0.3591 | 0.49      |

| Acc #                                                                                                        | Peptide                    | MH+       | z | XC     | DCN    | H/L ratio |
|--------------------------------------------------------------------------------------------------------------|----------------------------|-----------|---|--------|--------|-----------|
| P18031                                                                                                       | K.EFEQIDK.S                | 908.436   | 1 | 2.2065 | 0.104  | 0.10      |
| <i>Tyrosine-protein phosphatase, non-receptor type 4 (EC 3.1.3.48) (Protein-tyrosine phosphatase</i>         |                            |           |   |        |        |           |
| P29074                                                                                                       | K.LENEPDFQYIPEK].A         | 1625.7824 | 2 | 2.2971 | 0.0855 | 0.57      |
| <i>U5 small nuclear ribonucleoprotein 200 kDa helicase (EC 3.6.1.-) (U5 snRNP-specific 200 kDa</i>           |                            |           |   |        |        |           |
| O75643                                                                                                       | K.TLNLCKMIDK.R             | 1178.6272 | 2 | 2.5072 | 0.1382 | 0.04      |
| <i>Ubiquinol-cytochrome c reductase complex 7.2 kDa protein (EC 1.10.2.2) (Cytochrome C1, nonheme</i>        |                            |           |   |        |        |           |
| Q9UDW1                                                                                                       | R.AFDQGADAIYDHINEGK].L     | 1867.8588 | 2 | 2.9046 | 0.3457 | 3.46      |
| <i>Ubiquinol-cytochrome c reductase complex ubiquinone-binding protein QP-C (EC 1.10.2.2)</i>                |                            |           |   |        |        |           |
| O14949                                                                                                       | K.NPAAYENDK.-              | 1021.4585 | 1 | 2.8347 | 0.4387 | 0.07      |
| O14949                                                                                                       | K.NPAAYENDK.-              | 1021.4585 | 1 | 2.7782 | 0.4143 | 0.24      |
| O14949                                                                                                       | K.NPAAYENDK.-              | 1021.4585 | 1 | 2.9124 | 0.4145 | 0.61      |
| <i>Ubiquinol-cytochrome-c reductase complex core protein 2, mitochondrial precursor (EC 1.10.2.2)</i>        |                            |           |   |        |        |           |
| P22695                                                                                                       | R.GGLGLSGAK].A             | 763.4439  | 1 | 2.1533 | 0.1986 | 0.84      |
| P22695                                                                                                       | R.GGLGLSGAK].A             | 763.4439  | 1 | 1.9037 | 0.3147 | 0.71      |
| P22695                                                                                                       | K.ATAAPAGAPPQPQDLEFTK].L   | 1913.9734 | 2 | 3.389  | 0.4086 | 0.71      |
| P22695                                                                                                       | K.ATAAPAGAPPQPQDLEFTK.L    | 1909.9654 | 2 | 4.1517 | 0.659  | 0.71      |
| P22695                                                                                                       | K.ATAAPAGAPPQPQDLEFTK].L   | 1913.9734 | 2 | 3.701  | 0.4898 | 0.64      |
| P22695                                                                                                       | K.TIAQGNSNTDVQAAK.N        | 1630.8395 | 2 | 4.6302 | 0.6573 | 0.41      |
| P22695                                                                                                       | K.TIAQGNSNTDVQAAK.N        | 1630.8395 | 2 | 4.399  | 0.6798 | 0.41      |
| P22695                                                                                                       | K.ATAAPAGAPPQPQDLEFTK.L    | 1909.9654 | 2 | 4.1469 | 0.6341 | 0.64      |
| P22695                                                                                                       | K.TIAQGNSNTDVQAAK.N        | 1630.8395 | 2 | 4.3813 | 0.6557 | 0.35      |
| P22695                                                                                                       | R.NALANPLYC*PDYR.I         | 1566.7369 | 2 | 3.9337 | 0.514  | 0.68      |
| <i>Ubiquinol-cytochrome-c reductase complex core protein I, mitochondrial precursor (EC 1.10.2.2)</i>        |                            |           |   |        |        |           |
| P31930                                                                                                       | K.AVELLGDIVQNC*SLEDSQIEK.E | 2360.165  | 2 | 5.0826 | 0.7366 | 1.59      |
| P31930                                                                                                       | R.IAEVDASVVR.E             | 1058.584  | 1 | 2.4805 | 0.4254 | 0.28      |
| P31930                                                                                                       | R.MVLAAGGVEHQQLDLAQK.H     | 2092.1219 | 3 | 4.2835 | 0.4343 | 0.07      |
| P31930                                                                                                       | R.IAEVDASVVR.E             | 1058.584  | 2 | 3.0036 | 0.3916 | 0.19      |
| P31930                                                                                                       | R.NALVSHLDGTTTPVC*EDIGR.S  | 2053.9971 | 2 | 5.0945 | 0.6132 | 0.78      |
| P31930                                                                                                       | R.NALVSHLDGTTTPVC*EDIGR].S | 2058.0051 | 2 | 4.8678 | 0.4621 | 0.78      |
| <i>Ubiquitin carboxyl-terminal hydrolase 3 (EC 3.1.2.15) (Ubiquitin thiolesterase 3) (Ubiquitin-specific</i> |                            |           |   |        |        |           |
| Q9Y6I4                                                                                                       | R.KLLENSTLNSKLLK.V         | 1600.9632 | 2 | 2.281  | 0.1271 | 0.18      |
| <i>Ubiquitin carboxyl-terminal hydrolase 37 (EC 3.1.2.15) (Ubiquitin thiolesterase 37) (Ubiquitin-</i>       |                            |           |   |        |        |           |
| Q86T82                                                                                                       | K.REQFNDSLIDLP RR].K       | 1762.9326 | 2 | 2.8426 | 0.1413 | 15.67     |
| <i>Ubiquitin carboxyl-terminal hydrolase 5 (EC 3.1.2.15) (Ubiquitin thiolesterase 5) (Ubiquitin-specific</i> |                            |           |   |        |        |           |

| Acc #                                                                                                         | Peptide                  | MH+       | z | XC     | DCN    | H/L ratio |
|---------------------------------------------------------------------------------------------------------------|--------------------------|-----------|---|--------|--------|-----------|
| P45974                                                                                                        | R.VTSAVEALLSADSASR.K     | 1576.8177 | 2 | 2.5262 | 0.2641 | 1.60      |
| <b><i>Ubiquitin ligase protein CHFR (EC 6.3.2.-) (Checkpoint with forkhead and RING finger domains)</i></b>   |                          |           |   |        |        |           |
| Q96EP1                                                                                                        | R.NKITQDMLQPK[V          | 1319.7118 | 2 | 2.232  | 0.1669 | 1.38      |
| <b><i>Ubiquitin ligase protein MIB1 (EC 6.3.2.-) (Mind bomb homolog 1) (DAPK-interacting protein 1)</i></b>   |                          |           |   |        |        |           |
| Q86YT6                                                                                                        | R.QTPLHIAVVK.G           | 1120.6473 | 1 | 1.925  | 0.1512 | 0.65      |
| <b><i>Ubiquitin-conjugating enzyme E2 J1 (EC 6.3.2.19) (Non-canonical ubiquitin-conjugating enzyme 1)</i></b> |                          |           |   |        |        |           |
| Q9Y385                                                                                                        | K.SGSDSSQADQEAKE         | 1309.5502 | 2 | 2.4156 | 0.3449 | 0.27      |
| <b><i>UBX domain-containing protein 6 (Rep-8 protein) (Reproduction 8 protein)</i></b>                        |                          |           |   |        |        |           |
| O00124                                                                                                        | K.LGGDEGTSQTSFETSNR.E    | 1785.7886 | 2 | 4.9921 | 0.6723 | 0.64      |
| <b><i>UPF0198 protein CGI-141</i></b>                                                                         |                          |           |   |        |        |           |
| Q9Y3E0                                                                                                        | R.VPVLGSLNLPGIR.S        | 1447.8995 | 2 | 3.0276 | 0.4299 | 0.31      |
| <b><i>UPF0347 protein LOC55831</i></b>                                                                        |                          |           |   |        |        |           |
| Q9P0I2                                                                                                        | R.SIYSLILGQDNAADQSR.M    | 1850.9243 | 2 | 4.526  | 0.5829 | 0.19      |
| Q9P0I2                                                                                                        | K.LTQEQVSDSQVLIR.S       | 1615.865  | 2 | 4.169  | 0.5339 | 0.35      |
| <b><i>Vacuolar ATP synthase subunit d (EC 3.6.3.14) (V-ATPase d subunit) (Vacuolar proton pump d)</i></b>     |                          |           |   |        |        |           |
| P61421                                                                                                        | R.LYPEGLAQLAR.A          | 1230.6841 | 2 | 2.8007 | 0.4127 | 0.36      |
| P61421                                                                                                        | K.LLFEGAGSNPGDK.T        | 1304.6481 | 1 | 2.6469 | 0.434  | 0.13      |
| P61421                                                                                                        | K.LLFEGAGSNPGDK.T        | 1304.6481 | 2 | 3.9772 | 0.4262 | 0.12      |
| <b><i>Vacuolar proton translocating ATPase 116 kDa subunit a isoform 1 (V-ATPase 116-kDa isoform a1)</i></b>  |                          |           |   |        |        |           |
| Q93050                                                                                                        | R.IDDLQMVNLQTEDHR.Q      | 1826.8701 | 2 | 4.642  | 0.5548 | 1.20      |
| Q93050                                                                                                        | R.IDDLQMVNLQTEDHR[.Q     | 1830.8781 | 2 | 3.8172 | 0.1278 | 1.12      |
| <b><i>Vesicle trafficking protein SEC22b (SEC22 vesicle trafficking protein-like 1)</i></b>                   |                          |           |   |        |        |           |
| O75396                                                                                                        | R.DLQQYQSQAK.Q           | 1208.5906 | 1 | 2.8484 | 0.4203 | 0.36      |
| O75396                                                                                                        | R.NLGSINTELQDVQR.I       | 1586.8133 | 2 | 4.4457 | 0.5712 | 0.35      |
| O75396                                                                                                        | R.VADGLPLAASMQEDEQSGR.D  | 1973.9233 | 2 | 4.9987 | 0.6422 | 0.33      |
| O75396                                                                                                        | R.VADGLPLAASMQEDEQSGR.D  | 1973.9233 | 2 | 4.8354 | 0.6494 | 0.85      |
| O75396                                                                                                        | R.VADGLPLAASMQEDEQSGR[.D | 1977.9313 | 2 | 4.1826 | 0.3608 | 0.33      |
| O75396                                                                                                        | R.NLGSINTELQDVQR.I       | 1586.8133 | 2 | 3.3534 | 0.4227 | 0.35      |
| O75396                                                                                                        | R.VADGLPLAASMQEDEQSGR[.D | 1977.9313 | 2 | 3.8642 | 0.3687 | 0.36      |
| O75396                                                                                                        | R.DLQQYQSQAK.Q           | 1208.5906 | 2 | 3.5222 | 0.4705 | 1.19      |
| O75396                                                                                                        | R.DLQQYQSQAK[.Q          | 1212.5986 | 2 | 3.5281 | 0.4182 | 1.19      |
| O75396                                                                                                        | R.NLGSINTELQDVQR.I       | 1586.8133 | 2 | 4.7569 | 0.5047 | 0.40      |
| O75396                                                                                                        | R.NLGSINTELQDVQR.I       | 1586.8133 | 2 | 5.0026 | 0.5246 | 0.40      |
| O75396                                                                                                        | R.NLGSINTELQDVQR.I       | 1586.8133 | 2 | 4.3387 | 0.5368 | 0.38      |



| Acc #                                                                                                       | Peptide                 | MH+       | z | XC     | DCN    | H/L ratio |
|-------------------------------------------------------------------------------------------------------------|-------------------------|-----------|---|--------|--------|-----------|
| O75396                                                                                                      | R.IMVANIEEVLQR[G        | 1418.7803 | 2 | 4.079  | 0.2911 | 0.88      |
| O75396                                                                                                      | R.IMVANIEEVLQR.G        | 1414.7723 | 2 | 3.9952 | 0.4346 | 0.88      |
| O75396                                                                                                      | R.NLGSINTELQDVQR.I      | 1586.8133 | 2 | 2.6135 | 0.434  | 0.38      |
| O75396                                                                                                      | R.VADGLPLAASMQEDEQSGR.D | 1973.9233 | 2 | 5.1224 | 0.6812 | 0.36      |
| O75396                                                                                                      | K.LNEQSPTR.C            | 944.4796  | 1 | 2.109  | 0.2013 | 0.29      |
| O75396                                                                                                      | R.DLQQYQSQAK.Q          | 1208.5906 | 1 | 2.7512 | 0.2534 | 0.36      |
| <b><i>Vesicle-associated membrane protein-associated protein A (VAMP-associated protein A) (VAMP-A)</i></b> |                         |           |   |        |        |           |
| Q9P0L0                                                                                                      | K.FKGPFTDVVTTNLK[L      | 1570.8606 | 2 | 4.0273 | 0.4319 | 0.39      |
| Q9P0L0                                                                                                      | R.C*VFEMPENNDK.L        | 1382.5715 | 2 | 2.9982 | 0.3465 | 0.09      |
| Q9P0L0                                                                                                      | K.PHSVSLNDTETR.K        | 1355.655  | 2 | 2.7754 | 0.4547 | 0.33      |
| Q9P0L0                                                                                                      | K.PHSVSLNDTETR[K        | 1359.663  | 2 | 2.4744 | 0.2604 | 0.33      |
| Q9P0L0                                                                                                      | K.FKGPFTDVVTTNLK.L      | 1566.8526 | 2 | 4.3567 | 0.487  | 0.39      |
| <b><i>Vesicular integral-membrane protein VIP36 precursor (GP36b glycoprotein) (Lectin, mannose-</i></b>    |                         |           |   |        |        |           |
| Q12907                                                                                                      | K.DNVDDPTGNFR.S         | 1249.5444 | 2 | 3.7121 | 0.5005 | 0.39      |
| Q12907                                                                                                      | K.DNVDDPTGNFR[S         | 1253.5524 | 2 | 3.4717 | 0.3996 | 0.39      |
| <b><i>Vimentin</i></b>                                                                                      |                         |           |   |        |        |           |
| P08670                                                                                                      | R.ETNLDSLPLVDTHSK.R     | 1668.8439 | 2 | 3.9176 | 0.5678 | 0.31      |
| P08670                                                                                                      | R.ETNLDSLPLVDTHSK.R     | 1668.8439 | 2 | 4.4025 | 0.5865 | 0.43      |
| P08670                                                                                                      | R.ETNLDSLPLVDTHSK[R     | 1672.8519 | 2 | 3.6571 | 0.4467 | 0.31      |
| <b><i>Vitamin K epoxide reductase complex subunit 1 (EC 1.1.4.1) (Vitamin K1 2,3-epoxide reductase</i></b>  |                         |           |   |        |        |           |
| Q9BQB6                                                                                                      | R.ALC*DVGTAISC*SR.V     | 1409.6512 | 2 | 3.4277 | 0.5895 | 0.37      |
| <b><i>Voltage-dependent anion-selective channel protein 1 (VDAC-1) (hVDAC1) (Outer mitochondrial</i></b>    |                         |           |   |        |        |           |
| P21796                                                                                                      | R.VTQSNFAVGYK[T         | 1217.6292 | 2 | 2.7457 | 0.4203 | 0.49      |
| P21796                                                                                                      | K.YQIDPDAC*FSAK.V       | 1414.6307 | 2 | 2.7559 | 0.5283 | 0.79      |
| P21796                                                                                                      | K.LTFDSSFSPNTGK.K       | 1400.6692 | 2 | 3.63   | 0.6896 | 0.29      |
| P21796                                                                                                      | K.LTFDSSFSPNTGK.K       | 1400.6692 | 1 | 2.27   | 0.5709 | 0.44      |
| P21796                                                                                                      | K.YQIDPDAC*FSAK[V       | 1418.6387 | 2 | 2.8992 | 0.318  | 1.38      |
| P21796                                                                                                      | K.VNNSLIGLGYTQTLKPGIK.L | 2103.1808 | 2 | 4.4061 | 0.4096 | 1.11      |
| P21796                                                                                                      | K.SENGLEFTSSGSANTETTK.V | 1959.8778 | 2 | 5.6904 | 0.7143 | 0.40      |
| P21796                                                                                                      | K.LTFDSSFSPNTGK.K       | 1400.6692 | 2 | 3.4681 | 0.5916 | 0.33      |
| P21796                                                                                                      | R.VTQSNFAVGYK[T         | 1217.6292 | 1 | 2.2742 | 0.2782 | 0.38      |
| P21796                                                                                                      | K.LTFDSSFSPNTGKK.N      | 1528.7642 | 2 | 3.3036 | 0.5526 | 0.94      |
| P21796                                                                                                      | K.LTFDSSFSPNTGK.K       | 1400.6692 | 1 | 2.3297 | 0.4067 | 0.44      |
| P21796                                                                                                      | K.LTFDSSFSPNTGKK[N      | 1532.7722 | 2 | 3.0842 | 0.4171 | 0.94      |
| P21796                                                                                                      | K.VNNSLIGLGYTQTLKPGIK[L | 2107.1888 | 2 | 3.7421 | 0.425  | 0.85      |

| Acc #  | Peptide                   | MH+       | z | XC     | DCN    | H/L ratio |
|--------|---------------------------|-----------|---|--------|--------|-----------|
| P21796 | K.YQIDPDAC*FSAK.V         | 1414.6307 | 2 | 2.726  | 0.4691 | 1.38      |
| P21796 | R.VTQSNFAVGYK.T           | 1213.6212 | 2 | 3.4903 | 0.5564 | 0.57      |
| P21796 | K.WNTDNTLGTEITVEDQLAR.G   | 2176.0517 | 2 | 5.2157 | 0.5647 | 0.38      |
| P21796 | R.VTQSNFAVGYK.T           | 1213.6212 | 2 | 3.1127 | 0.4379 | 0.49      |
| P21796 | R.VTQSNFAVGYK[T.T         | 1217.6292 | 2 | 3.5477 | 0.5264 | 0.52      |
| P21796 | K.VNNSLIGLGYTQTLKPGIK.L   | 2103.1808 | 2 | 5.2379 | 0.4062 | 0.85      |
| P21796 | K.LTFDSSFSPTGK[K.K        | 1404.6772 | 2 | 3.2434 | 0.4515 | 0.33      |
| P21796 | K.SENGLLEFTSSGSANTETTK.V  | 1959.8778 | 2 | 5.5376 | 0.6256 | 0.96      |
| P21796 | K.WNTDNTLGTEITVEDQLAR[G.G | 2180.0597 | 2 | 3.7986 | 0.3731 | 0.38      |
| P21796 | K.LTFDSSFSPTGK[K.K        | 1404.6772 | 1 | 2.2967 | 0.3949 | 0.55      |
| P21796 | K.LTFDSSFSPTGK.K          | 1400.6692 | 1 | 2.6134 | 0.6054 | 0.32      |
| P21796 | K.LTFDSSFSPTGK.K          | 1400.6692 | 2 | 3.6343 | 0.6689 | 0.23      |
| P21796 | R.VTQSNFAVGYK.T           | 1213.6212 | 1 | 2.0013 | 0.1376 | 0.25      |
| P21796 | R.VTQSNFAVGYK.T           | 1213.6212 | 2 | 3.333  | 0.568  | 0.52      |
| P21796 | K.VNNSLIGLGYTQTLKPGIK[L.L | 2107.1888 | 2 | 3.2799 | 0.4102 | 1.11      |
| P21796 | K.LTFDSSFSPTGK.K          | 1400.6692 | 2 | 3.5116 | 0.6566 | 0.34      |
| P21796 | R.VTQSNFAVGYK.T           | 1213.6212 | 1 | 2.2332 | 0.3041 | 0.38      |
| P21796 | R.VTQSNFAVGYK.T           | 1213.6212 | 1 | 2.2651 | 0.3022 | 0.38      |
| P21796 | K.LTFDSSFSPTGK.K          | 1400.6692 | 1 | 2.2    | 0.5936 | 0.55      |

***Voltage-dependent anion-selective channel protein 3 (VDAC-3) (hVDAC3) (Outer mitochondrial***

|        |                          |           |   |        |        |      |
|--------|--------------------------|-----------|---|--------|--------|------|
| Q9Y277 | K.VC*NYGLTFTQK.W         | 1330.646  | 1 | 2.2209 | 0.4222 | 0.54 |
| Q9Y277 | K.LTLDTIFVPNTGK[K.K      | 1422.797  | 2 | 3.9745 | 0.348  | 0.26 |
| Q9Y277 | K.VNNASLIGLGYTQTLR.P     | 1719.9388 | 2 | 5.1189 | 0.5767 | 0.94 |
| Q9Y277 | K.LTLDTIFVPNTGK[K.K      | 1422.797  | 2 | 3.5365 | 0.264  | 0.17 |
| Q9Y277 | K.LTLDTIFVPNTGK.K        | 1418.789  | 2 | 3.6945 | 0.539  | 0.17 |
| Q9Y277 | K.LTLDTIFVPNTGK.K        | 1418.789  | 2 | 3.6279 | 0.5028 | 0.26 |
| Q9Y277 | K.LTLDTIFVPNTGK.K        | 1418.789  | 2 | 3.1755 | 0.4425 | 0.51 |
| Q9Y277 | K.LTLDTIFVPNTGK.K        | 1418.789  | 1 | 2.757  | 0.6034 | 0.15 |
| Q9Y277 | K.LSQNNFALGYK.A          | 1254.6477 | 2 | 2.6678 | 0.0808 | 0.14 |
| Q9Y277 | K.LSQNNFALGYK.A          | 1254.6477 | 2 | 3.6885 | 0.4494 | 0.15 |
| Q9Y277 | K.VC*NYGLTFTQK.W         | 1330.646  | 2 | 3.6642 | 0.2947 | 0.16 |
| Q9Y277 | K.LSQNNFALGYK.A          | 1254.6477 | 2 | 3.0308 | 0.5123 | 0.19 |
| Q9Y277 | K.VNNASLIGLGYTQTLRPGVK.L | 2101.1764 | 2 | 3.1695 | 0.4047 | 3.69 |
| Q9Y277 | K.LSQNNFALGYK.A          | 1254.6477 | 2 | 3.5109 | 0.5076 | 0.27 |

***WD-repeat protein 67***

|        |                  |           |   |        |        |      |
|--------|------------------|-----------|---|--------|--------|------|
| Q96DN5 | R.NKCYQEVAKLLR.E | 1464.7991 | 2 | 2.3538 | 0.2611 | 0.04 |
|--------|------------------|-----------|---|--------|--------|------|

| Acc #                                                                                                       | Peptide                    | MH+       | z | XC     | DCN    | H/L ratio |
|-------------------------------------------------------------------------------------------------------------|----------------------------|-----------|---|--------|--------|-----------|
| <b><i>Wee1-like protein kinase (EC 2.7.1.112) (WEE1hu)</i></b>                                              |                            |           |   |        |        |           |
| P30291                                                                                                      | K.ADIFALALTVVC*AAGAEPLPR.N | 2155.158  | 2 | 2.2076 | 0.1183 | 0.07      |
| <b><i>Wnt-4 protein precursor</i></b>                                                                       |                            |           |   |        |        |           |
| P56705                                                                                                      | R.ALVPRNAQFK[P             | 1147.6713 | 1 | 1.9706 | 0.1266 | 0.27      |
| <b><i>YLP motif containing protein 1 (Nuclear protein ZAP3) (ZAP113)</i></b>                                |                            |           |   |        |        |           |
| P49750                                                                                                      | K.GPVVAKDTPEPVK[E          | 1340.7551 | 1 | 2.0509 | 0.0962 | 105.27    |
| <b><i>ZDHHC8 protein</i></b>                                                                                |                            |           |   |        |        |           |
| Q96GI9                                                                                                      | -.MDRGTQGPHR.P             | 1154.5483 | 1 | 1.9212 | 0.0984 | 0.08      |
| <b><i>Zinc finger CCCH type antiviral protein 1 (Zinc finger CCCH type domain containing protein 2)</i></b> |                            |           |   |        |        |           |
| Q7Z2W4                                                                                                      | R.VALVNDLSLSDVTSTSSR.V     | 1851.9294 | 2 | 5.6798 | 0.6334 | 1.06      |
| <b><i>Zinc finger FYVE domain-containing protein 16 (Endofin) (Endosome-associated FYVE domain)</i></b>     |                            |           |   |        |        |           |
| Q7Z3T8                                                                                                      | K.YIENLDNITFTESFLSSK.D     | 2121.0386 | 2 | 2.485  | 0.1245 | 0.11      |
| <b><i>Zinc finger protein 263 (Zinc finger protein FPM315)</i></b>                                          |                            |           |   |        |        |           |
| O14978                                                                                                      | K.CLECGKCFSQNTHLTR[H       | 1843.8379 | 2 | 2.6501 | 0.1485 | 0.47      |
| <b><i>Zinc finger protein 300</i></b>                                                                       |                            |           |   |        |        |           |
| Q96RE9                                                                                                      | K.GVTRDGLSCL*SILK.V        | 1405.7468 | 2 | 2.3629 | 0.0918 | 0.10      |
| <b><i>Zinc finger protein 317</i></b>                                                                       |                            |           |   |        |        |           |
| Q96PQ6                                                                                                      | R.GAHQGACADWETPSKTK[W      | 1790.8257 | 2 | 2.3088 | 0.2492 | 20.40     |
| <b><i>Zinc finger protein 510</i></b>                                                                       |                            |           |   |        |        |           |
| Q9Y2H8                                                                                                      | K.PFQC�KCGKTFGQK.S         | 1585.7614 | 2 | 2.5468 | 0.1941 | 0.02      |
| <b><i>Zinc finger protein 512</i></b>                                                                       |                            |           |   |        |        |           |
| Q96ME7                                                                                                      | R.QQPGIELPETELSLR.V        | 1709.9068 | 2 | 2.3206 | 0.2241 | 0.27      |
| <b><i>Zinc transporter 1 (ZnT-1) (Solute carrier family 30 member 1)</i></b>                                |                            |           |   |        |        |           |
| Q9Y6M5                                                                                                      | K.ESALILLQTVPK.Q           | 1311.7882 | 2 | 3.2085 | 0.3863 | 0.30      |
