# Supplementary material
Source: PubMed Central journal article supplement (PMC3479679)
Supplement: NIHMS409433-supplement-Table_S1b.pdf [file NIHMS409433-supplement-Table_S1b.pdf]

**Supplemental Table S-1b. A list of 588 proteins quantified by XPRESS, sorted by protein name.**

| <b>Acc #</b> | <b>Protein name</b>                                                      | <b>TPC</b> | <b>H/L ratio</b> | <b>SD</b> |
|--------------|--------------------------------------------------------------------------|------------|------------------|-----------|
| O00461       | 130 kD Golgi-localized phosphoprotein                                    | 1          | 0.26             |           |
| Q15392       | 24-dehydrocholesterol reductase precursor (EC 1.3.1.-) (3-beta-hydrox    | 1          | 0.36             |           |
| Q99460       | 26S proteasome non-ATPase regulatory subunit 1 (26S proteasome re        | 5          | 0.48             | 0.34      |
| P62280       | 40S ribosomal protein S11                                                | 1          | 0.90             |           |
| P62263       | 40S ribosomal protein S14                                                | 1          | 0.34             |           |
| P62269       | 40S ribosomal protein S18 (Ke-3) (Ke3)                                   | 3          | 0.35             | 0.03      |
| P23396       | 40S ribosomal protein S3                                                 | 1          | 0.36             |           |
| P62861       | 40S ribosomal protein S30                                                | 1          | 0.00             |           |
| P08195       | 4F2 cell-surface antigen heavy chain (4F2hc) (Lymphocyte activation a    | 91         | 0.50             | 0.38      |
| Q07020       | 60S ribosomal protein L18                                                | 2          | 0.92             | 0.42      |
| Q02543       | 60S ribosomal protein L18a                                               | 1          | 0.28             |           |
| P62829       | 60S ribosomal protein L23 (Ribosomal protein L17)                        | 3          | 0.68             | 0.45      |
| P62899       | 60S ribosomal protein L31                                                | 1          | 0.37             |           |
| P83881       | 60S ribosomal protein L36a (60S ribosomal protein L44) (Migration-ind    | 1          | 1.11             |           |
| P36578       | 60S ribosomal protein L4 (L1)                                            | 3          | 1.21             | 1.56      |
| P11021       | 78 kDa glucose-regulated protein precursor (GRP 78) (Immunoglobuli       | 5          | 1.26             | 1.26      |
| Q9UBM7       | 7-dehydrocholesterol reductase (EC 1.3.1.21) (7-DHC reductase) (Ster     | 6          | 0.98             | 0.79      |
| O00400       | Acetyl-coenzyme A transporter 1 (AT-1) (Acetyl-CoA transporter) (Solu    | 2          | 0.19             | 0.12      |
| Q6P7J9       | ADAM metalloproteinase with thrombospondin type 1 motif, 7, prepropr     | 1          | 1.87             |           |
| Q8TB61       | Adenosine 3'-phospho 5'-phosphosulfate transporter 1 (PAPS transpor      | 3          | 0.91             | 0.47      |
| P12235       | ADP/ATP translocase 1 (Adenine nucleotide translocator 1) (ANT 1) (A     | 1          | 0.24             |           |
| P05141       | ADP/ATP translocase 2 (Adenine nucleotide translocator 2) (ANT 2) (A     | 10         | 0.27             | 0.12      |
| O00116       | Alkyldihydroxyacetonephosphate synthase, peroxisomal precursor (EC       | 1          | 1.08             |           |
| Q11128       | Alpha-(1,3)-fucosyltransferase (EC 2.4.1.65) (Galactoside 3-L-fucosyltr  | 1          | 1.59             |           |
| Q9H6U8       | Alpha-1,2-mannosyltransferase ALG9 (EC 2.4.1.-) (Asparagine-linked       | 1          | 0.36             |           |
| P35609       | Alpha-actinin 2 (Alpha actinin skeletal muscle isoform 2) (F-actin cross | 1          | 11.07            |           |
| Q15911       | Alpha-fetoprotein enhancer binding protein (AT motif-binding factor) (A  | 1          | 1.42             |           |
| Q86WK6       | Amphoterin-induced protein 1 precursor (Alivin-2)                        | 1          | 0.42             |           |
| Q8WWH4       | Ankyrin repeat, SAM and basic leucine zipper domain-containing prote     | 1          | 0.05             |           |

| Acc #  | Protein name                                                             | TPC | H/L ratio | SD   |
|--------|--------------------------------------------------------------------------|-----|-----------|------|
| P04083 | Annexin A1 (Annexin I) (Lipocortin I) (Calpactin II) (Chromobindin-9) (p | 1   | 2.53      |      |
| Q9UKV3 | Apoptotic chromatin condensation inducer in the nucleus (Acinus)         | 2   | 2.41      | 1.16 |
| O14727 | Apoptotic protease-activating factor 1 (Apaf-1)                          | 1   | 0.14      |      |
| Q8IU5  | ARP5 actin-related protein 5 homolog                                     | 1   | 0.26      |      |
| Q9Y4J0 | Aspartyl(Asparaginy)l-beta-hydroxylase                                   | 2   | 0.36      | 0.00 |
| P25705 | ATP synthase alpha chain, mitochondrial precursor (EC 3.6.3.14)          | 26  | 0.64      | 0.54 |
| P06576 | ATP synthase beta chain, mitochondrial precursor (EC 3.6.3.14)           | 15  | 0.43      | 0.17 |
| P18859 | ATP synthase coupling factor 6, mitochondrial precursor (EC 3.6.3.14)    | 1   | 0.93      |      |
| O75947 | ATP synthase D chain, mitochondrial (EC 3.6.3.14)                        | 6   | 0.85      | 1.07 |
| P30049 | ATP synthase delta chain, mitochondrial precursor (EC 3.6.3.14)          | 1   | 1.55      |      |
| P56385 | ATP synthase e chain, mitochondrial (EC 3.6.3.14)                        | 7   | 0.20      | 0.21 |
| O75964 | ATP synthase g chain, mitochondrial (EC 3.6.3.14) (ATPase subunit G      | 4   | 0.38      | 0.04 |
| P36542 | ATP synthase gamma chain, mitochondrial precursor (EC 3.6.3.14)          | 4   | 0.39      | 0.16 |
| P48047 | ATP synthase O subunit, mitochondrial precursor (EC 3.6.3.14) (Oligo     | 8   | 0.75      | 0.47 |
| Q8NBU5 | ATPase family AAA domain containing protein 1                            | 4   | 0.61      | 1.03 |
| Q86UK0 | ATP-binding cassette sub-family A member 12 (ATP-binding cassette        | 1   | 2.19      |      |
| P33897 | ATP-binding cassette sub-family D member 1 (Adrenoleukodystrophy         | 6   | 0.74      | 0.67 |
| P28288 | ATP-binding cassette sub-family D member 3 (70 kDa peroxisomal me        | 10  | 0.51      | 0.32 |
| Q9UNQ0 | ATP-binding cassette sub-family G member 2 (Placenta-specific ATP-       | 16  | 0.56      | 0.74 |
| Q92499 | ATP-dependent RNA helicase DDX1 (EC 3.6.1.-) (DEAD box protein 1         | 1   | 2.08      |      |
| Q9NT62 | Autophagy protein 3-like (APG3-like) (hApg3) (PC3-96 protein)            | 1   | 1.82      |      |
| Q7Z3C6 | Autophagy protein 9-like 1 (APG9-like 1)                                 | 1   | 1.46      |      |
| Q8IXQ6 | B aggressive lymphoma protein                                            | 1   | 0.87      |      |
| O95816 | BAG family molecular chaperone regulator 2 (BCL2-associated athano       | 3   | 0.65      | 0.42 |
| Q9BXC9 | Bardet-Biedl syndrome 2 protein                                          | 3   | 0.41      | 0.48 |
| P35613 | Basigin precursor (CD147 antigen) (Leukocyte activation antigen M6) (    | 4   | 0.47      | 0.25 |
| Q9C0K0 | B-cell lymphoma/leukemia 11B (B-cell CLL/lymphoma 11B) (Radiation        | 1   | 0.27      |      |
| Q9UHQ4 | B-cell receptor-associated protein 29 (BCR-associated protein Bap29)     | 2   | 0.31      | 0.04 |
| P51572 | B-cell receptor-associated protein 31 (BCR-associated protein Bap31)     | 17  | 0.27      | 0.16 |
| P53674 | Beta crystallin B1                                                       | 1   | 0.19      |      |

| Acc #  | Protein name                                                              | TPC | H/L ratio | SD   |
|--------|---------------------------------------------------------------------------|-----|-----------|------|
| P61769 | Beta-2-microglobulin precursor [Contains: Beta-2-microglobulin variant    | 2   | 0.50      | 0.00 |
| Q9Y223 | Bifunctional UDP-N-acetylglucosamine 2-epimerase/N-acetylmannosa          | 1   | 1.00      |      |
| P80723 | Brain acid soluble protein 1 (BASP1 protein) (Neuronal axonal membra      | 8   | 0.37      | 0.24 |
| Q9Y6D6 | Brefeldin A-inhibited guanine nucleotide-exchange protein 1 (Brefeldin    | 1   | 1.66      |      |
| Q9NXS3 | BTB/POZ domain-containing protein 5                                       | 1   | 0.61      |      |
| Q15800 | C-4 methylsterol oxidase (EC 1.14.13.72) (Methylsterol monooxygenas       | 1   | 1.79      |      |
| O75844 | CAAX prenyl protease 1 homolog (EC 3.4.24.84) (Prenyl protein-specif      | 10  | 0.19      | 0.18 |
| Q14517 | Cadherin-related tumor suppressor homolog precursor (Fat protein ho       | 1   | 0.20      |      |
| P98194 | Calcium-transporting ATPase type 2C member 1 (EC 3.6.3.8) (ATPas          | 1   | 0.49      |      |
| P27824 | Calnexin precursor (Major histocompatibility complex class I antigen-bi   | 4   | 0.80      | 0.79 |
| Q9GZY7 | CAMP/cGMP cyclic nucleotide phosphodiesterase 11A3                        | 1   | 0.50      |      |
| Q8NG31 | Cancer susceptibility candidate gene 5 protein (ALL1-fused gene from      | 1   | 0.07      |      |
| P31327 | Carbamoyl-phosphate synthase [ammonia], mitochondrial precursor (         | 1   | 0.35      |      |
| P50416 | Carnitine O-palmitoyltransferase I, mitochondrial liver isoform (EC 2.3.  | 3   | 0.54      | 0.34 |
| P11717 | Cation-independent mannose-6-phosphate receptor precursor (CI Man         | 1   | 15.15     |      |
| P51636 | Caveolin-2                                                                | 2   | 0.51      | 0.00 |
| P13987 | CD59 glycoprotein precursor (Membrane attack complex inhibition fact      | 3   | 4.33      | 6.41 |
| Q6ZMV5 | CDNA FLJ16643 fis, clone TEST14029528                                     | 1   | 0.24      |      |
| Q8NBI5 | CDNA PSEC0252 fis, clone NT2RP3003258, highly similar to Likely or        | 3   | 0.35      | 0.21 |
| O75943 | Cell cycle checkpoint protein RAD17 (hRad17) (RF-C/activator 1 homo       | 1   | 0.15      |      |
| Q99459 | Cell division cycle 5-like protein (Cdc5-like protein) (Pombe cdc5-relate | 2   | 0.24      | 0.06 |
| Q15057 | Centaurin-beta 2 (Cnt-b2)                                                 | 1   | 0.47      |      |
| Q66GS9 | Centrosomal protein 4 (Centrosomal protein of 135 kDa) (Cep135 prot       | 1   | 0.30      |      |
| Q70F00 | Centrosome spindle pole associated protein                                | 1   | 0.48      |      |
| Q16739 | Ceramide glucosyltransferase (EC 2.4.1.80) (Glucosylceramide syntha       | 1   | 0.61      |      |
| O00590 | Chemokine-binding protein 2 (Chemokine-binding protein D6) (C-C ch        | 2   | 1.97      | 2.01 |
| Q8IZ52 | Chondroitin sulfate synthase 2 (EC 2.4.1.175) (Glucuronosyl-N-acetylg     | 1   | 0.34      |      |
| Q5TF85 | Chromosome 6 open reading frame 37                                        | 2   | 2.59      | 0.00 |
| Q6PEV5 | CKLFSF1 protein                                                           | 1   | 0.40      |      |
| Q00610 | Clathrin heavy chain 1 (CLH-17)                                           | 2   | 0.67      | 0.44 |

| Acc #  | Protein name                                                            | TPC | H/L ratio | SD     |
|--------|-------------------------------------------------------------------------|-----|-----------|--------|
| Q5W1L8 | CMP-sialic acid transporter                                             | 1   | 1.43      |        |
| Q9NX63 | Coiled-coil-helix-coiled-coil-helix domain containing protein 3         | 12  | 0.59      | 0.33   |
| Q02388 | Collagen alpha 1(VII) chain precursor (Long-chain collagen) (LC collag  | 3   | 0.50      | 0.10   |
| Q07021 | Complement component 1, Q subcomponent binding protein, mitoch          | 3   | 0.48      | 0.17   |
| Q9NS00 | Core1 UDP-galactose:N-acetylgalactosamine-alpha-R beta 1,3-galacto      | 1   | 0.30      |        |
| P57737 | Coronin-7 (70 kDa WD repeat tumor rejection antigen homolog)            | 1   | 0.04      |        |
| P61073 | C-X-C chemokine receptor type 4 (CXC-R4) (CXCR-4) (Stromal cell-de      | 1   | 0.16      |        |
| P20674 | Cytochrome c oxidase polypeptide Va, mitochondrial precursor (EC 1.     | 2   | 0.61      | 0.06   |
| P10606 | Cytochrome c oxidase polypeptide Vb, mitochondrial precursor (EC 1.     | 5   | 0.40      | 0.37   |
| P09669 | Cytochrome c oxidase polypeptide VIc precursor (EC 1.9.3.1)             | 4   | 0.40      | 0.11   |
| P14406 | Cytochrome c oxidase polypeptide VIIa-liver/heart, mitochondrial precu  | 4   | 7.05      | 12.57  |
| P13073 | Cytochrome c oxidase subunit IV isoform 1, mitochondrial precursor (E   | 4   | 0.63      | 0.26   |
| Q14548 | Cytochrome c oxidase subunit VIIa-related protein, mitochondrial prec   | 2   | 0.57      | 0.00   |
| P08574 | Cytochrome c1, heme protein, mitochondrial precursor (Cytochrome c-     | 7   | 0.60      | 0.54   |
| P53701 | Cytochrome c-type heme lyase (EC 4.4.1.17) (CCHL) (Holocytochrom        | 1   | 0.40      |        |
| Q16850 | Cytochrome P450 51A1 (EC 1.14.13.70) (CYPLI) (P450LI) (Sterol 14-a      | 1   | 0.36      |        |
| Q6NT55 | Cytochrome P450, family 2, subfamily E, polypeptide 2 homolog           | 1   | 0.19      |        |
| Q96P26 | Cytosolic 5'-nucleotidase 1B (EC 3.1.3.5) (Cytosolic 5'-nucleotidase IB | 1   | 0.60      |        |
| Q9NYF0 | Dapper homolog 1 (hDPR1) (Heptacellular carcinoma novel gene 3 pr       | 1   | 0.22      |        |
| Q6YHU2 | Death receptor interacting protein splice variant                       | 3   | 157.35    | 167.37 |
| Q14185 | Dedicator of cytokinesis protein 1 (180 kDa protein downstream of CR    | 1   | 188.67    |        |
| P61803 | Defender against cell death 1 (DAD-1)                                   | 3   | 0.42      | 0.22   |
| Q96HY7 | Dehydrogenase E1 and transketolase domain containing protein 1          | 2   | 1.63      | 0.06   |
| Q8NBQ5 | Dehydrogenase/reductase SDR family member 8 precursor (EC 1.1.1.        | 3   | 0.44      | 0.33   |
| Q8TB45 | DEP domain containing 6                                                 | 1   | 0.38      |        |
| Q75140 | DEP domain containing protein 5                                         | 1   | 0.17      |        |
| P81605 | Dermcidin precursor (Preproteolysin) [Contains: Survival-promoting pe   | 2   | 0.75      | 0.00   |
| Q4KKU6 | Desmoglein 2, preproprotein                                             | 3   | 0.28      | 0.21   |
| P15924 | Desmoplakin (DP) (250/210 kDa paraneoplastic pemphigus antigen)         | 1   | 0.50      |        |
| Q5FWG1 | DGKG protein                                                            | 1   | 0.47      |        |

| Acc #  | Protein name                                                              | TPC | H/L ratio | SD   |
|--------|---------------------------------------------------------------------------|-----|-----------|------|
| O75907 | Diacylglycerol O-acyltransferase 1 (EC 2.3.1.20) (Diglyceride acyltrans   | 2   | 1.06      | 1.21 |
| O95886 | Disks large-associated protein 3 (DAP-3) (SAP90/PSD-95-associated         | 1   | 0.37      |      |
| Q8IY66 | DNA ligase IV (Ligase IV, DNA, ATP-dependent)                             | 1   | 37.85     |      |
| P04053 | DNA nucleotidylxotransferase (EC 2.7.7.31) (Terminal addition enzy        | 1   | 0.18      |      |
| P25205 | DNA replication licensing factor MCM3 (DNA polymerase alpha holoen        | 1   | 27.59     |      |
| Q9BUI4 | DNA-directed RNA polymerase III 62 kDa polypeptide (EC 2.7.7.6) (R        | 1   | 0.66      |      |
| O00411 | DNA-directed RNA polymerase, mitochondrial precursor (EC 2.7.7.6) (       | 1   | 6.29      |      |
| Q5T219 | DnaJ (Hsp40) homolog, subfamily D, member 1 (Growth-inhibiting 22)        | 1   | 0.12      |      |
| Q86YN1 | Dolichyldiphosphatase 1 (EC 3.6.1.43) (Dolichyl pyrophosphate phosp       | 1   | 0.58      |      |
| Q5VWA5 | Dolichyl-diphosphooligosaccharide-protein glycosyltransferase             | 7   | 0.41      | 0.20 |
| P04843 | Dolichyl-diphosphooligosaccharide--protein glycosyltransferase 67 kDa     | 45  | 0.52      | 0.39 |
| Q92685 | Dolichyl-P-Man:Man(5)GlcNAc(2)-PP-dolichyl mannosyltransferase (E         | 5   | 0.39      | 0.17 |
| O75691 | Down-regulated in metastasis protein (Key-1A6 protein) (Novel nucleol     | 2   | 0.33      | 0.02 |
| Q6UXB4 | DTTR431 (C-type lectin superfamily 4, member G)                           | 1   | 7.38      |      |
| O00429 | Dynamin-1-like protein (EC 3.6.5.5) (Dynamin-like protein) (Dnm1p/Vp      | 2   | 8.89      | 0.62 |
| Q13409 | Dynein intermediate chain 2, cytosolic (DH IC-2) (Cytoplasmic dynein i    | 1   | 0.83      |      |
| P11532 | Dystrophin                                                                | 1   | 0.05      |      |
| P13639 | Elongation factor 2 (EF-2)                                                | 1   | 0.12      |      |
| P49411 | Elongation factor Tu, mitochondrial precursor (EF-Tu) (P43)               | 1   | 0.58      |      |
| Q9BW60 | Elongation of very long chain fatty acids protein 1                       | 2   | 27.80     | 2.03 |
| Q9BVF7 | Elongation protein 3 homolog (Hypothetical protein DKFZp761L098)          | 1   | 1.13      |      |
| P29317 | Ephrin type-A receptor 2 precursor (EC 2.7.1.112) (Tyrosine-protein ki    | 3   | 0.17      | 0.16 |
| Q9UHB6 | Epithelial protein lost in neoplasm                                       | 1   | 0.26      |      |
| Q14677 | Epsin-4 (Epsin-related protein) (EpsinR) (Enthoprotin) (Clathrin interact | 1   | 0.45      |      |
| P49257 | ERGIC-53 protein precursor (ER-Golgi intermediate compartment 53 k        | 1   | 0.09      |      |
| Q969X5 | ER-Golgi intermediate compartment 32 kDa protein (ERGIC-32)               | 1   | 0.30      |      |
| P27105 | Erythrocyte band 7 integral membrane protein (Stomatin) (Protein 7.2b     | 5   | 0.53      | 0.18 |
| Q99613 | Eukaryotic translation initiation factor 3 subunit 8 (eIF3 p110) (eIF3c)  | 1   | 2.26      |      |
| O60447 | EVI-5 homolog                                                             | 1   | 0.52      |      |
| P52907 | F-actin capping protein alpha-1 subunit (CapZ alpha-1)                    | 1   | 0.23      |      |

| <b>Acc #</b> | <b>Protein name</b>                                                     | <b>TPC</b> | <b>H/L ratio</b> | <b>SD</b> |
|--------------|-------------------------------------------------------------------------|------------|------------------|-----------|
| Q53EP0       | Factor for adipocyte differentiation 104 variant (Fragment)             | 1          | 0.07             |           |
| Q01469       | Fatty acid-binding protein, epidermal (E-FABP) (Psoriasis-associated f  | 1          | 1.61             |           |
| Q6PCT2       | F-box/LRR-repeat protein 19 (F-box and leucine-rich repeat protein 19)  | 2          | 0.37             | 0.05      |
| Q9Y5Y0       | Feline leukemia virus subgroup C receptor-related protein 1 (Feline leu | 1          | 0.48             |           |
| Q9BS16       | FKSG14 protein (Leucine zipper protein AF5alpha) (SoxLZ/Sox6 leucin     | 1          | 25.44            |           |
| Q9BYX7       | FKSG30                                                                  | 1          | 180.23           |           |
| Q9H7J3       | FLJ00086 protein (Fragment)                                             | 1          | 0.18             |           |
| Q8TEP9       | FLJ00144 protein (Fragment)                                             | 1          | 0.08             |           |
| Q6IAA8       | FLJ20625 protein                                                        | 1          | 21.79            |           |
| O75955       | Flotillin-1                                                             | 3          | 0.38             | 0.16      |
| Q14254       | Flotillin-2 (Epidermal surface antigen) (ESA)                           | 3          | 1.65             | 1.58      |
| Q92735       | FMI protein                                                             | 1          | 0.79             |           |
| Q14488       | Forkhead box protein G1C (Forkhead-related protein FKHL3) (HFK3) (      | 1          | 0.49             |           |
| Q71RG4       | FP2653 (ELSD1897) (MGC3123 protein)                                     | 2          | 0.63             | 0.00      |
| O60353       | Frizzled 6 precursor (Frizzled-6) (Fz-6) (hFz6)                         | 2          | 0.87             | 0.11      |
| Q6ZV73       | FYVE, RhoGEF and PH domain containing protein 6 (Zinc finger FYV        | 1          | 0.81             |           |
| P41002       | G2/mitotic-specific cyclin-F                                            | 1          | 0.85             |           |
| P07316       | Gamma crystallin B (Gamma crystallin 1-2)                               | 1          | 0.31             |           |
| O95452       | Gap junction beta-6 protein (Connexin-30) (Cx30)                        | 1          | 0.09             |           |
| Q6P1A2       | Gene rich cluster, C3f gene                                             | 3          | 0.47             | 0.18      |
| Q7Z6J2       | General receptor for phosphoinositides 1-associated scaffold protein (  | 2          | 2.00             | 0.77      |
| P39086       | Glutamate receptor, ionotropic kainate 1 precursor (Glutamate recepto   | 1          | 0.41             |           |
| P48506       | Glutamate--cysteine ligase catalytic subunit (EC 6.3.2.2) (Gamma-glut   | 1          | 0.57             |           |
| P48637       | Glutathione synthetase (EC 6.3.2.3) (Glutathione synthase) (GSH synt    | 2          | 0.06             | 0.03      |
| Q5JR58       | Glyceraldehyde 3-phosphate dehydrogenase (GAPDH)                        | 1          | 0.17             |           |
| P04406       | Glyceraldehyde-3-phosphate dehydrogenase, liver (EC 1.2.1.12) (GAP      | 1          | 2.09             |           |
| P06737       | Glycogen phosphorylase, liver form (EC 2.4.1.1)                         | 1          | 0.42             |           |
| Q9NZD2       | Glycolipid transfer protein (GLTP)                                      | 1          | 0.48             |           |
| Q9UBI6       | Guanine nucleotide-binding protein G(I)/G(S)/G(O) gamma-12 subunit      | 3          | 0.17             | 0.07      |
| P62879       | Guanine nucleotide-binding protein G(I)/G(S)/G(T) beta subunit 2 (Tra   | 1          | 0.80             |           |

| Acc #     | Protein name                                                           | TPC | H/L ratio | SD   |
|-----------|------------------------------------------------------------------------|-----|-----------|------|
| P08754    | Guanine nucleotide-binding protein G(k), alpha subunit (G(i) alpha-3)  | 2   | 0.80      | 0.34 |
| O95837    | Guanine nucleotide-binding protein, alpha-14 subunit (G-protein alpha  | 1   | 0.16      |      |
| Q6J203    | HCV F-transactivated protein 1                                         | 1   | 0.44      |      |
| P11142    | Heat shock cognate 71 kDa protein (Heat shock 70 kDa protein 8)        | 9   | 0.58      | 0.58 |
| P04792    | Heat-shock protein beta-1 (HspB1) (Heat shock 27 kDa protein) (HSP     | 3   | 0.87      | 0.42 |
| Q15034    | HECT domain and RCC1-like domain protein 3                             | 1   | 2.39      |      |
| Q969F9    | Hermansky-Pudlak syndrome 3 protein                                    | 1   | 1.38      |      |
| P16401    | Histone H1.5 (Histone H1a)                                             | 2   | 0.25      | 0.00 |
| P62805    | Histone H4                                                             | 23  | 0.44      | 0.24 |
| Q96L73    | Histone-lysine N-methyltransferase, H3 lysine-36 and H4 lysine-20 spe  | 1   | 0.33      |      |
| Q15047    | Histone-lysine N-methyltransferase, H3 lysine-9 specific 4 (EC 2.1.1.4 | 1   | 3.21      |      |
| GAG_Prote | HIV GAG protein                                                        | 23  | 8.77      | 8.72 |
| Q8MH63    | HLAT1-3TM                                                              | 2   | 0.42      | 0.12 |
| O14529    | Homeobox protein Cux-2 (Cut-like 2)                                    | 1   | 6.43      |      |
| Q15011    | Homocysteine-responsive endoplasmic reticulum-resident ubiquitin-lik   | 1   | 0.41      |      |
| P57058    | Hormonally up-regulated neu tumor-associated kinase (EC 2.7.1.37) (    | 1   | 0.60      |      |
| Q86YZ3    | Hornerin                                                               | 1   | 3.58      |      |
| Q9Y5U9    | HSPC039 protein (Hypothetical transmembrane protein) (Immediate e      | 1   | 0.50      |      |
| Q9NZY6    | HSPC049                                                                | 1   | 0.04      |      |
| Q9P035    | HSPC121                                                                | 5   | 0.31      | 0.04 |
| Q9UJM8    | Hydroxyacid oxidase 1 (EC 1.1.3.15) (HAOX1) (Glycolate oxidase) (G     | 1   | 0.05      |      |
| Q32M75    | Hypothetical protein                                                   | 1   | 0.29      |      |
| Q3B7X4    | Hypothetical protein                                                   | 2   | 0.43      | 0.11 |
| Q3KRF4    | Hypothetical protein                                                   | 1   | 0.50      |      |
| Q3MJA4    | Hypothetical protein                                                   | 1   | 0.12      |      |
| Q49AJ3    | Hypothetical protein                                                   | 1   | 4.58      |      |
| Q4G0N0    | Hypothetical protein                                                   | 3   | 0.60      | 0.72 |
| Q6PQ33    | Hypothetical protein                                                   | 1   | 0.53      |      |
| Q8NFK8    | Hypothetical protein (Novel protein)                                   | 1   | 1.24      |      |
| Q8N1H7    | Hypothetical protein C14orf39                                          | 1   | 0.53      |      |

| <b>Acc #</b> | <b>Protein name</b>                                                 | <b>TPC</b> | <b>H/L ratio</b> | <b>SD</b> |
|--------------|---------------------------------------------------------------------|------------|------------------|-----------|
| Q5H9S5       | Hypothetical protein DKFZp313B047                                   | 1          | 0.11             |           |
| Q9H0H5       | Hypothetical protein DKFZp434C011 (RACGAP1 protein)                 | 1          | 0.40             |           |
| Q8IYM0       | Hypothetical protein DKFZP434J0113                                  | 2          | 0.35             | 0.10      |
| Q8NDA2       | Hypothetical protein DKFZp434P0216 (Fragment)                       | 1          | 1.30             |           |
| Q5HY96       | Hypothetical protein DKFZp686C0394                                  | 1          | 0.06             |           |
| Q6MZH2       | Hypothetical protein DKFZp686J07132                                 | 1          | 0.05             |           |
| Q68DQ6       | Hypothetical protein DKFZp686O22167                                 | 1          | 0.28             |           |
| Q6AHZ3       | Hypothetical protein DKFZp781B2386                                  | 1          | 32.08            |           |
| Q5H9U9       | Hypothetical protein DKFZp781D1175                                  | 1          | 0.13             |           |
| Q68DK2       | Hypothetical protein DKFZp781H1112                                  | 1          | 0.45             |           |
| Q6AHZ1       | Hypothetical protein DKFZp781O2147                                  | 1          | 0.08             |           |
| Q8TC56       | Hypothetical protein FAM71B                                         | 1          | 0.41             |           |
| Q9NVA4       | Hypothetical protein FLJ10846                                       | 1          | 0.24             |           |
| Q9H8U9       | Hypothetical protein FLJ13213                                       | 1          | 0.57             |           |
| Q96A33       | Hypothetical protein FLJ14938 (Hypothetical protein NT2RP2003902) ( | 2          | 0.27             | 0.02      |
| Q6ZN37       | Hypothetical protein FLJ16464                                       | 1          | 0.13             |           |
| Q6ZMX2       | Hypothetical protein FLJ16617                                       | 1          | 9.13             |           |
| Q9NXG7       | Hypothetical protein FLJ20261                                       | 1          | 0.43             |           |
| Q9NX61       | Hypothetical protein FLJ20422 (AVLG582)                             | 1          | 1.01             |           |
| Q9NX40       | Hypothetical protein FLJ20455 (TPA018) (Ovarian carcinoma immunor   | 4          | 0.87             | 0.33      |
| Q8TEC2       | Hypothetical protein FLJ23658                                       | 1          | 1.90             |           |
| Q96N66       | Hypothetical protein FLJ31346                                       | 1          | 0.27             |           |
| Q96N64       | Hypothetical protein FLJ31359                                       | 1          | 5.21             |           |
| Q96MH7       | Hypothetical protein FLJ32363                                       | 1          | 0.14             |           |
| Q96M69       | Hypothetical protein FLJ32786                                       | 1          | 0.19             |           |
| Q8N1U5       | Hypothetical protein FLJ37549                                       | 1          | 0.36             |           |
| Q8N8I4       | Hypothetical protein FLJ39430                                       | 1          | 0.23             |           |
| Q6ZWG9       | Hypothetical protein FLJ41103                                       | 1          | 10.50            |           |
| Q6ZVH2       | Hypothetical protein FLJ42583                                       | 1          | 0.36             |           |
| Q6ZV38       | Hypothetical protein FLJ43035                                       | 1          | 0.79             |           |



| <b>Acc #</b> | <b>Protein name</b>                                                        | <b>TPC</b> | <b>H/L ratio</b> | <b>SD</b> |
|--------------|----------------------------------------------------------------------------|------------|------------------|-----------|
| Q6ZTN4       | Hypothetical protein FLJ44477                                              | 1          | 7.73             |           |
| Q6ZT81       | Hypothetical protein FLJ44884                                              | 1          | 9.16             |           |
| Q6ZST6       | Hypothetical protein FLJ45221                                              | 1          | 0.20             |           |
| Q6ZRQ5       | Hypothetical protein FLJ46180                                              | 1          | 0.15             |           |
| Q6ZQW6       | Hypothetical protein FLJ46844                                              | 1          | 0.54             |           |
| Q71M32       | Hypothetical protein FP14381                                               | 1          | 0.30             |           |
| Q96S30       | Hypothetical protein gene +108                                             | 1          | 0.31             |           |
| Q96RY5       | Hypothetical protein KIAA1426                                              | 1          | 0.17             |           |
| Q96CP7       | Hypothetical protein LOC116238                                             | 1          | 6.23             |           |
| Q96BQ5       | Hypothetical protein LOC133957 (Hypothetical protein FLJ25701)             | 1          | 0.35             |           |
| Q9BQ15       | Hypothetical protein MGC2731                                               | 3          | 0.33             | 0.09      |
| Q8NDZ4       | Hypothetical protein MGC33365                                              | 1          | 0.65             |           |
| Q8IV33       | Hypothetical protein MGC34713                                              | 1          | 0.12             |           |
| Q96AG4       | Hypothetical protein PRO1855                                               | 7          | 0.26             | 0.14      |
| Q8TC63       | IGHG4 protein                                                              | 1          | 0.32             |           |
| Q3ZCQ8       | Import inner membrane translocase subunit TIM50, mitochondrial prec        | 2          | 2.06             | 1.73      |
| Q14164       | Inhibitor of nuclear factor kappa-B kinase epsilon subunit (EC 2.7.1.-) (  | 1          | 0.19             |           |
| Q15070       | Inner membrane protein OXA1L, mitochondrial precursor (Oxidase ass         | 2          | 0.47             | 0.03      |
| Q14571       | Inositol 1,4,5-trisphosphate receptor type 2 (Type 2 inositol 1,4,5-trisph | 1          | 0.80             |           |
| Q14573       | Inositol 1,4,5-trisphosphate receptor type 3 (Type 3 inositol 1,4,5-trisph | 1          | 0.12             |           |
| Q8WYA0       | Intraflagellar transport 81 (Carnitine deficiency-associated protein expr  | 1          | 3.09             |           |
| Q6UXX5       | ITI-like protein (Inter-alpha (Globulin) inhibitor H5-like)                | 1          | 103.23           |           |
| Q8N5M9       | Jagunal homolog 1                                                          | 1          | 0.32             |           |
| Q6A163       | Ka35 protein                                                               | 2          | 0.71             | 0.14      |
| Q86Z20       | Kenae1                                                                     | 1          | 0.04             |           |
| Q14664       | Keratin 10                                                                 | 1          | 0.17             |           |
| P02533       | Keratin, type I cytoskeletal 14 (Cytokeratin-14) (CK-14) (Keratin-14) (K   | 1          | 0.81             |           |
| P08779       | Keratin, type I cytoskeletal 16 (Cytokeratin-16) (CK-16) (Keratin-16) (K   | 1          | 1.19             |           |
| P05783       | Keratin, type I cytoskeletal 18 (Cytokeratin-18) (CK-18) (Keratin-18) (K   | 15         | 0.35             | 0.25      |
| P35527       | Keratin, type I cytoskeletal 9 (Cytokeratin-9) (CK-9) (Keratin-9) (K9)     | 37         | 1.19             | 1.09      |

| Acc #  | Protein name                                                               | TPC | H/L ratio | SD   |
|--------|----------------------------------------------------------------------------|-----|-----------|------|
| P04264 | Keratin, type II cytoskeletal 1 (Cytokeratin-1) (CK-1) (Keratin-1) (K1) (6 | 77  | 1.16      | 0.60 |
| Q7Z794 | Keratin, type II cytoskeletal 1b                                           | 1   | 0.42      |      |
| P13647 | Keratin, type II cytoskeletal 5 (Cytokeratin-5) (CK-5) (Keratin-5) (K5) (5 | 5   | 0.97      | 0.50 |
| P08729 | Keratin, type II cytoskeletal 7 (Cytokeratin-7) (CK-7) (Keratin-7) (K7) (S | 6   | 1.44      | 2.41 |
| P05787 | Keratin, type II cytoskeletal 8 (Cytokeratin-8) (CK-8) (Keratin-8) (K8)    | 5   | 0.10      | 0.01 |
| Q6PG45 | Keratinocyte associated protein 2                                          | 1   | 0.62      |      |
| Q9C0D2 | KIAA1731 protein (Fragment)                                                | 1   | 82.56     |      |
| Q96JH4 | KIAA1853 protein (Fragment)                                                | 1   | 4.30      |      |
| Q86UP2 | Kinectin (Kinesin receptor) (CG-1 antigen)                                 | 1   | 0.42      |      |
| Q14807 | Kinesin-like protein KIF22 (Kinesin-like DNA-binding protein) (Kinesin-I   | 1   | 0.58      |      |
| Q16719 | Kynureninase (EC 3.7.1.3) (L-kynurenine hydrolase)                         | 1   | 0.22      |      |
| P48449 | Lanosterol synthase (EC 5.4.99.7) (Oxidosqualene--lanosterol cyclase)      | 1   | 0.33      |      |
| Q01650 | Large neutral amino acids transporter small subunit 1 (L-type amino ac     | 6   | 0.25      | 0.16 |
| Q8TC61 | Leucine zipper transcription factor-like 1                                 | 1   | 8.93      |      |
| O95202 | Leucine zipper-EF-hand containing transmembrane protein 1, mitoch          | 1   | 0.27      |      |
| Q8NHJ6 | Leukocyte immunoglobulin-like receptor subfamily B member 4 precu          | 1   | 1.03      |      |
| O00188 | LLGL protein                                                               | 1   | 0.52      |      |
| Q8N5G0 | LOC389203 protein (Fragment)                                               | 1   | 0.17      |      |
| Q9BUI5 | LOC51234 protein                                                           | 1   | 0.54      |      |
| Q6PCB7 | Long-chain fatty acid transport protein 1 (EC 6.2.1.-) (Fatty acid transp  | 1   | 0.10      |      |
| Q14108 | Lysosome membrane protein II (LIMP II) (Scavenger receptor class B         | 2   | 0.25      | 0.08 |
| P14174 | Macrophage migration inhibitory factor (MIF) (Phenylpyruvate tautomer      | 1   | 0.41      |      |
| Q6UW68 | MBC3205 (Hypothetical protein UNQ501)                                      | 1   | 0.47      |      |
| O95427 | Mcd4p homolog                                                              | 1   | 0.34      |      |
| O00264 | Membrane associated progesterone receptor component 1 (mPR)                | 5   | 0.41      | 0.32 |
| O15173 | Membrane associated progesterone receptor component 2 (Progester           | 4   | 1.34      | 1.12 |
| Q9UM00 | Membrane protein (STMF151) (LOC54499) (Xenogeneic cross-immun              | 3   | 0.37      | 0.16 |
| Q5BJH2 | MGC13159 protein                                                           | 1   | 0.28      |      |
| P10620 | Microsomal glutathione S-transferase 1 (EC 2.5.1.18) (Microsomal GS        | 5   | 0.58      | 0.13 |
| Q5J9I5 | Migration-inducing protein 7                                               | 1   | 0.47      |      |

| Acc #  | Protein name                                                             | TPC | H/L ratio | SD   |
|--------|--------------------------------------------------------------------------|-----|-----------|------|
| Q8TCT9 | Minor histocompatibility antigen H13 (EC 3.4.99.-) (Signal peptide pept  | 7   | 0.28      | 0.06 |
| Q02978 | Mitochondrial 2-oxoglutarate/malate carrier protein (OGCP) (Solute car   | 2   | 0.20      | 0.10 |
| Q546F9 | Mitochondrial aspartate-glutamate carrier protein                        | 4   | 0.86      | 1.12 |
| Q9Y6C9 | Mitochondrial carrier homolog 2 (Met-induced mitochondrial protein)      | 10  | 0.22      | 0.14 |
| Q9UBX3 | Mitochondrial dicarboxylate carrier                                      | 2   | 0.14      | 0.15 |
| O60830 | Mitochondrial import inner membrane translocase subunit Tim17-B          | 1   | 0.31      |      |
| Q15388 | Mitochondrial import receptor subunit TOM20 homolog (Mitochondrial       | 1   | 0.19      |      |
| Q9NS69 | Mitochondrial import receptor subunit TOM22 homolog (Translocase of      | 1   | 0.15      |      |
| Q16891 | Mitochondrial inner membrane protein (Mitofilin) (p87/89) (Proliferation | 33  | 0.41      | 0.28 |
| O94826 | Mitochondrial precursor proteins import receptor (Translocase of outer   | 1   | 0.22      |      |
| Q5JPR4 | Mitogen-activated protein kinase kinase kinase 15 (Fragment)             | 1   | 7.98      |      |
| Q9BVC6 | Mitsugumin-23 precursor (Mg23)                                           | 3   | 0.50      | 0.38 |
| P53985 | Monocarboxylate transporter 1 (MCT 1)                                    | 6   | 0.69      | 0.02 |
| O15427 | Monocarboxylate transporter 4 (MCT 4) (MCT 3)                            | 12  | 0.21      | 0.05 |
| Q9H3T8 | MOP-3                                                                    | 1   | 0.21      |      |
| Q8IZD4 | mRNA decapping enzyme 1B (EC 3.-.-.-)                                    | 1   | 0.12      |      |
| P10244 | Myb-related protein B (B-Myb)                                            | 1   | 0.18      |      |
| O43795 | Myosin Ib (Myosin I alpha) (MMI-alpha) (MMIa) (MYH-1c)                   | 4   | 2.69      | 3.65 |
| Q4KMR3 | Myosin IE                                                                | 1   | 0.41      |      |
| P35580 | Myosin-10 (Myosin heavy chain, nonmuscle IIb) (Nonmuscle myosin h        | 3   | 0.81      | 1.06 |
| P35579 | Myosin-9 (Myosin heavy chain, nonmuscle IIa) (Nonmuscle myosin he        | 14  | 0.41      | 0.17 |
| Q13496 | Myotubularin (EC 3.1.3.48)                                               | 1   | 0.56      |      |
| Q76KP1 | N-acetylgalactosaminyltransferase                                        | 2   | 0.10      | 0.09 |
| Q86SF2 | N-acetylgalactosaminyltransferase 7 (EC 2.4.1.-) (Protein-UDP acetyl     | 1   | 0.09      |      |
| Q13423 | NAD(P) transhydrogenase, mitochondrial precursor (EC 1.6.1.2) (Pyrid     | 1   | 0.53      |      |
| Q9NXA8 | NAD-dependent deacetylase sirtuin-5 (EC 3.5.1.-) (SIR2-like protein 5)   | 1   | 0.86      |      |
| P00387 | NADH-cytochrome b5 reductase (EC 1.6.2.2) (B5R) (Diaphorase-1) (C        | 3   | 0.14      | 0.07 |
| O75489 | NADH-ubiquinone oxidoreductase 30 kDa subunit, mitochondrial precu       | 1   | 0.53      |      |
| P49821 | NADH-ubiquinone oxidoreductase 51 kDa subunit, mitochondrial precu       | 1   | 1.25      |      |
| P28331 | NADH-ubiquinone oxidoreductase 75 kDa subunit, mitochondrial precu       | 1   | 0.46      |      |

| Acc #  | Protein name                                                            | TPC | H/L ratio | SD   |
|--------|-------------------------------------------------------------------------|-----|-----------|------|
| O43676 | NADH-ubiquinone oxidoreductase B12 subunit (EC 1.6.5.3) (EC 1.6.99      | 1   | 0.49      |      |
| O95139 | NADH-ubiquinone oxidoreductase B17 subunit (EC 1.6.5.3) (EC 1.6.99      | 1   | 0.17      |      |
| P03905 | NADH-ubiquinone oxidoreductase chain 4 (EC 1.6.5.3) (NADH dehydr        | 1   | 0.20      |      |
| P03923 | NADH-ubiquinone oxidoreductase chain 6 (EC 1.6.5.3) (NADH dehydr        | 1   | 0.31      |      |
| Q8WU60 | NADH-ubiquinone oxidoreductase flavoprotein 3, isoform a                | 1   | 0.50      |      |
| P16435 | NADPH--cytochrome P450 reductase (EC 1.6.2.4) (CPR) (P450R)             | 22  | 0.69      | 0.63 |
| Q13765 | Nascent polypeptide-associated complex alpha subunit (NAC-alpha) (      | 1   | 0.67      |      |
| Q86UW6 | NEDD4-binding protein 2 (EC 3.-.-) (N4BP2) (BCL-3-binding protein)      | 1   | 0.18      |      |
| Q9HCC7 | NEDD4-like ubiquitin ligase 1                                           | 1   | 0.81      |      |
| O43402 | Neighbor of COX4                                                        | 1   | 0.26      |      |
| P32004 | Neural cell adhesion molecule L1 precursor (N-CAM L1) (CD171 antig      | 3   | 0.37      | 0.21 |
| P17677 | Neuromodulin (Axonal membrane protein GAP-43) (Growth associated        | 1   | 2.99      |      |
| P30532 | Neuronal acetylcholine receptor protein, alpha-5 subunit precursor      | 1   | 0.40      |      |
| Q14697 | Neutral alpha-glucosidase AB precursor (EC 3.2.1.84) (Glucosidase II    | 1   | 0.49      |      |
| Q15758 | Neutral amino acid transporter B(0) (ATB(0)) (Sodium-dependent neutr    | 6   | 0.65      | 0.28 |
| Q9H2Q2 | NGT                                                                     | 2   | 1.47      | 1.62 |
| P29475 | Nitric-oxide synthase, brain (EC 1.14.13.39) (NOS type I) (Neuronal N   | 1   | 23.46     |      |
| Q5JP08 | Novel protein                                                           | 1   | 0.22      |      |
| Q5SWH9 | Novel protein                                                           | 1   | 0.33      |      |
| Q5VZP5 | Novel protein                                                           | 1   | 0.24      |      |
| Q7LBC6 | Nuclear protein 5qNCA                                                   | 1   | 1.39      |      |
| Q9GZY0 | Nuclear RNA export factor 2 (TAP-like protein 2) (TAPL-2)               | 2   | 0.01      | 0.00 |
| P67809 | Nuclease sensitive element binding protein 1 (Y-box binding protein 1)  | 1   | 0.82      |      |
| Q9NR30 | Nucleolar RNA helicase 2 (EC 3.6.1.-) (Nucleolar RNA helicase II) (Nu   | 2   | 0.92      | 0.00 |
| Q8NI70 | OK/SW-CL.16                                                             | 1   | 0.28      |      |
| O43869 | Olfactory receptor 2T1 (Olfactory receptor 1-25) (OR1-25) (Olfactory re | 1   | 0.05      |      |
| Q5TFD7 | OTTHUMP00000016784                                                      | 1   | 4.20      |      |
| Q5JUJ7 | OTTHUMP00000017314 (Fragment)                                           | 1   | 0.25      |      |
| Q5VYA5 | OTTHUMP00000017471                                                      | 1   | 0.30      |      |
| Q4VXA4 | OTTHUMP00000021035                                                      | 1   | 0.24      |      |

| Acc #  | Protein name                                                            | TPC | H/L ratio | SD   |
|--------|-------------------------------------------------------------------------|-----|-----------|------|
| Q9NQJ4 | OTTHUMP00000031372                                                      | 1   | 0.53      |      |
| P56715 | Oxygen-regulated protein 1 (Retinitis pigmentosa RP1 protein) (Retiniti | 1   | 0.49      |      |
| P23284 | Peptidyl-prolyl cis-trans isomerase B precursor (EC 5.2.1.8) (PPIase) ( | 2   | 2.86      | 3.56 |
| Q9Y3E5 | Peptidyl-tRNA hydrolase 2, mitochondrial precursor (EC 3.1.1.29) (PT    | 1   | 0.29      |      |
| O95613 | Pericentrin (Pericentrin B) (Kendrin)                                   | 1   | 0.65      |      |
| Q00325 | Phosphate carrier protein, mitochondrial precursor (PTP)                | 13  | 0.35      | 0.11 |
| O95674 | Phosphatidate cytidyltransferase 2 (EC 2.7.7.41) (CDP-diglyceride sy    | 6   | 0.83      | 0.18 |
| O00750 | Phosphatidylinositol-4-phosphate 3-kinase C2 domain-containing beta     | 1   | 0.86      |      |
| P48651 | Phosphatidylserine synthase 1 (EC 2.7.8.-) (PtdSer synthase 1) (PSS-    | 2   | 0.83      | 0.29 |
| Q9BVG9 | Phosphatidylserine synthase 2 (EC 2.7.8.-) (PtdSer synthase 2) (PSS-    | 4   | 0.39      | 0.04 |
| Q16526 | Photolyase (Cryptochrome 1)                                             | 6   | 0.18      | 0.02 |
| Q4LE51 | PIK3CA variant protein (Fragment)                                       | 1   | 0.21      |      |
| Q9H307 | Pinin (140 kDa nuclear and cell adhesion-related phosphoprotein) (Do    | 6   | 0.60      | 0.39 |
| P20020 | Plasma membrane calcium-transporting ATPase 1 (EC 3.6.3.8) (PMC         | 1   | 0.24      |      |
| Q9Y4D7 | Plexin D1 precursor                                                     | 1   | 2.68      |      |
| Q9HB66 | PNAS-117                                                                | 2   | 0.37      | 0.03 |
| Q6NZI2 | Polymerase I and transcript release factor (PTRF protein)               | 1   | 0.15      |      |
| Q10471 | Polypeptide N-acetylgalactosaminyltransferase 2 (EC 2.4.1.41) (Protei   | 2   | 0.62      | 0.64 |
| Q96S06 | Possible integral membrane                                              | 1   | 10.90     |      |
| Q9NS91 | Postreplication repair protein RAD18 (hRAD18) (hHR18) (RING finger      | 1   | 0.11      |      |
| Q719H9 | Potassium channel tetramerization domain-containing 1 (KCTD1 protei     | 1   | 0.22      |      |
| Q96MT3 | Prickle-like protein 1 (REST/NRSF-interacting LIM domain protein 1)     | 1   | 1.17      |      |
| Q96CF8 | PRKR interacting protein 1 (IL11 inducible)                             | 1   | 1.05      |      |
| Q9H375 | PRO0756                                                                 | 2   | 65.88     | 4.32 |
| Q9HD20 | Probable cation-transporting ATPase 13A1 (EC 3.6.3.-)                   | 6   | 0.61      | 0.20 |
| O94919 | Probable endonuclease KIAA0830 precursor (EC 3.1.30.-)                  | 2   | 0.48      | 0.00 |
| Q8IWK6 | Probable G-protein coupled receptor 125 precursor                       | 1   | 0.15      |      |
| O96008 | Probable mitochondrial import receptor subunit TOM40 homolog (Tran      | 7   | 0.44      | 0.48 |
| Q9NPF4 | Probable O-sialoglycoprotein endopeptidase (EC 3.4.24.57) (hOSGEP       | 1   | 1.62      |      |
| Q8IUH4 | Probable palmitoyltransferase ZDHHC13 (EC 2.3.1.-) (Zinc finger DHH     | 1   | 0.03      |      |

| <b>Acc #</b> | <b>Protein name</b>                                                    | <b>TPC</b> | <b>H/L ratio</b> | <b>SD</b> |
|--------------|------------------------------------------------------------------------|------------|------------------|-----------|
| Q9H6R6       | Probable palmitoyltransferase ZDHHC6 (EC 2.3.1.-) (Zinc finger DHH     | 1          | 0.16             |           |
| Q8WUM4       | Programmed cell death 6-interacting protein (PDCD6-interacting protei  | 1          | 0.27             |           |
| P35232       | Prohibitin                                                             | 25         | 0.42             | 0.25      |
| Q99623       | Prohibitin-2 (B-cell receptor-associated protein BAP37) (Repressor of  | 44         | 0.62             | 0.37      |
| Q9HCU5       | Prolactin regulatory element-binding protein (Mammalian guanine nucl   | 1          | 1.02             |           |
| O14684       | Prostaglandin E synthase (EC 5.3.99.3) (Microsomal glutathione S-tra   | 2          | 0.28             | 0.26      |
| Q9NZ45       | Protein C10orf70                                                       | 1          | 0.78             |           |
| Q6P0N0       | Protein C14orf106 (P243)                                               | 3          | 0.40             | 0.45      |
| Q8IVT2       | Protein C19orf21                                                       | 3          | 0.50             | 0.16      |
| Q8NC44       | Protein C2orf17                                                        | 1          | 0.44             |           |
| Q9H330       | Protein C9orf5 (Protein CG-2)                                          | 1          | 0.08             |           |
| Q96CS3       | Protein expressed in T-cells and eosinophils in atopic dermatitis (ETE | 2          | 0.21             | 0.05      |
| Q14165       | Protein KIAA0152 precursor                                             | 2          | 0.32             | 0.01      |
| O43156       | Protein KIAA0406                                                       | 1          | 0.66             |           |
| O94927       | Protein KIAA0841                                                       | 1          | 3.39             |           |
| Q9UPV7       | Protein KIAA1045                                                       | 1          | 0.10             |           |
| Q96JH8       | Protein KIAA1849                                                       | 1          | 1.34             |           |
| Q02156       | Protein kinase C, epsilon type (EC 2.7.1.-) (nPKC-epsilon)             | 1          | 0.21             |           |
| Q15139       | Protein kinase, D1 type (EC 2.7.1.-) (nPKC-D1) (Protein kinase D) (Pr  | 1          | 10.13            |           |
| Q86UE4       | Protein LYRIC (Lysine-rich CEACAM1 co-isolated protein) (3D3/lyric) (  | 1          | 0.79             |           |
| P61619       | Protein transport protein Sec61 alpha subunit isoform 1 (Sec61 alpha-  | 3          | 0.23             | 0.13      |
| P60468       | Protein transport protein Sec61 beta subunit                           | 12         | 0.46             | 0.93      |
| Q6Y1H2       | Protein tyrosine phosphatase-like member b (Protein tyrosine phospho   | 1          | 0.15             |           |
| O60725       | Protein-S-isoprenylcysteine O-methyltransferase (EC 2.1.1.100) (Isopr  | 1          | 0.10             |           |
| Q9Y5E6       | Protocadherin beta 3 precursor (PCDH-beta3)                            | 1          | 0.44             |           |
| Q8TB72       | Pumilio homolog 2 (Pumilio-2)                                          | 1          | 0.53             |           |
| Q96QD8       | Putative 40-9-1 protein                                                | 3          | 1.40             | 1.39      |
| Q8IXJ9       | Putative Polycomb group protein ASXL1 (Additional sex combs-like pr    | 2          | 0.14             | 0.04      |
| Q9Y4G8       | Rap guanine nucleotide exchange factor 2 (PDZ domain containing gu     | 1          | 1.42             |           |
| P46940       | Ras GTPase-activating-like protein IQGAP1 (p195)                       | 1          | 0.35             |           |

| <b>Acc #</b> | <b>Protein name</b>                                                     | <b>TPC</b> | <b>H/L ratio</b> | <b>SD</b> |
|--------------|-------------------------------------------------------------------------|------------|------------------|-----------|
| P61026       | Ras-related protein Rab-10                                              | 1          | 0.52             |           |
| P61106       | Ras-related protein Rab-14                                              | 2          | 1.55             | 1.83      |
| P62820       | Ras-related protein Rab-1A (YPT1-related protein)                       | 1          | 0.44             |           |
| Q9H0U4       | Ras-related protein Rab-1B                                              | 1          | 0.17             |           |
| P61019       | Ras-related protein Rab-2A                                              | 3          | 0.54             | 0.19      |
| Q9BZG1       | Ras-related protein Rab-34 (Rab-39) (Ras-related protein Rah)           | 1          | 0.18             |           |
| P51148       | Ras-related protein Rab-5C (RAB5L) (L1880)                              | 4          | 0.31             | 0.10      |
| P51149       | Ras-related protein Rab-7                                               | 17         | 0.98             | 1.01      |
| P61006       | Ras-related protein Rab-8A (Oncogene c-mel)                             | 2          | 0.42             | 0.12      |
| P51151       | Ras-related protein Rab-9A (Rab-9)                                      | 1          | 0.23             |           |
| Q6YNB5       | Relaxin-like factor b                                                   | 1          | 0.12             |           |
| O95811       | Retinoblastoma binding protein 2 homolog 1                              | 1          | 0.10             |           |
| Q8NFJ5       | Retinoic acid-induced protein 3 (G-protein coupled receptor family C gr | 12         | 0.78             | 0.37      |
| Q8IUC4       | Rhopilin-2 (GTP-Rho binding protein 2) (76 kDa RhoB effector protein    | 1          | 0.04             |           |
| P84095       | Rho-related GTP-binding protein RhoG                                    | 1          | 0.53             |           |
| Q9P2E9       | Ribosome-binding protein 1 (Ribosome receptor protein) (180 kDa ribo    | 1          | 0.80             |           |
| Q9NW13       | RNA-binding protein 28 (RNA-binding motif protein 28)                   | 1          | 0.15             |           |
| Q15287       | RNA-binding protein with serine-rich domain 1 (SR-related protein LDC   | 1          | 0.28             |           |
| Q49A11       | RPS27L protein                                                          | 1          | 0.13             |           |
| Q15413       | Ryanodine receptor 3 (Brain-type ryanodine receptor) (RyR3) (RYR-3)     | 2          | 1.10             | 1.34      |
| P16615       | Sarcoplasmic/endoplasmic reticulum calcium ATPase 2 (EC 3.6.3.8) (      | 18         | 0.39             | 0.42      |
| Q8WTV0       | Scavenger receptor class B member 1 (SRB1) (SR-BI) (CD36 antigen-       | 3          | 0.45             | 0.10      |
| O75880       | SCO1 protein homolog, mitochondrial precursor                           | 1          | 0.55             |           |
| Q4VX17       | Secretory carrier membrane protein 3                                    | 1          | 0.30             |           |
| Q14674       | Separin (EC 3.4.22.49) (Separase) (Caspase-like protein ESPL1) (Extr    | 1          | 0.36             |           |
| Q13501       | Sequestosome-1 (Phosphotyrosine-independent ligand for the Lck SH       | 2          | 0.68             | 0.00      |
| P48595       | Serpin B10 (Bomapin) (Protease inhibitor 10)                            | 1          | 0.44             |           |
| Q52WX2       | SH3-binding kinase                                                      | 1          | 0.18             |           |
| Q9H9B4       | Sideroflexin-1 (Tricarboxylate carrier protein) (TCC)                   | 6          | 0.77             | 0.40      |
| Q9Y6A9       | Signal peptidase complex subunit 1 (EC 3.4.-.-) (Microsomal signal pe   | 1          | 0.16             |           |

| <b>Acc #</b> | <b>Protein name</b>                                                      | <b>TPC</b> | <b>H/L ratio</b> | <b>SD</b> |
|--------------|--------------------------------------------------------------------------|------------|------------------|-----------|
| Q15005       | Signal peptidase complex subunit 2 (EC 3.4.-.-) (Microsomal signal pe    | 6          | 0.45             | 0.21      |
| P61009       | Signal peptidase complex subunit 3 (EC 3.4.-.-) (Microsomal signal pe    | 5          | 0.33             | 0.23      |
| Q9Y5M8       | Signal recognition particle receptor beta subunit (SR-beta) (Protein AP  | 4          | 0.32             | 0.10      |
| P40763       | Signal transducer and activator of transcription 3 (Acute-phase respon   | 2          | 0.18             | 0.05      |
| Q9BTI6       | Similar to flotillin 2                                                   | 1          | 0.38             |           |
| Q8N5K1       | Similar to mouse 1500009M05Rik protein                                   | 4          | 0.42             | 0.29      |
| Q04837       | Single-stranded DNA-binding protein, mitochondrial precursor (Mt-SSB     | 1          | 0.68             |           |
| Q96EQ0       | Small glutamine-rich tetratricopeptide repeat-containing protein B (Sm   | 1          | 0.64             |           |
| Q96PI1       | Small proline-rich protein 4                                             | 1          | 0.16             |           |
| P05023       | Sodium/potassium-transporting ATPase alpha-1 chain precursor (EC 3       | 4          | 0.46             | 0.22      |
| P14415       | Sodium/potassium-transporting ATPase beta-2 chain (Sodium/potassi        | 1          | 0.09             |           |
| P54709       | Sodium/potassium-transporting ATPase beta-3 chain (Sodium/potassi        | 2          | 0.26             | 0.20      |
| Q9Y289       | Sodium-dependent multivitamin transporter (Na(+)-dependent multivita     | 2          | 0.56             | 0.28      |
| P11166       | Solute carrier family 2, facilitated glucose transporter member 1 (Gluc  | 2          | 0.62             | 0.22      |
| Q6NUK1       | Solute carrier family 25 member 24, isoform 1                            | 1          | 0.23             |           |
| Q9Y512       | Sorting and assembly machinery component 50 homolog                      | 10         | 0.41             | 0.31      |
| Q8TCJ2       | Source of immunodominant MHC-associated peptides                         | 6          | 0.35             | 0.25      |
| Q13813       | Spectrin alpha chain, brain (Spectrin, non-erythroid alpha chain) (Alph  | 26         | 0.45             | 0.47      |
| Q01082       | Spectrin beta chain, brain 1 (Spectrin, non-erythroid beta chain 1) (Bet | 2          | 0.29             | 0.03      |
| O75477       | SPFH domain protein 1 precursor (Protein KE04)                           | 1          | 0.98             |           |
| O94905       | SPFH domain protein 2 precursor                                          | 4          | 0.41             | 0.08      |
| Q9NRA0       | Sphingosine kinase 2 (EC 2.7.1.-) (SK 2) (SPK 2)                         | 1          | 0.26             |           |
| Q9UHA8       | Splicing coactivator subunit SRm300                                      | 4          | 0.54             | 0.22      |
| Q9NY15       | Stabilin-1 precursor (FEEL-1 protein) (MS-1 antigen)                     | 1          | 149.47           |           |
| P52823       | Stanniocalcin-1 precursor (STC-1)                                        | 1          | 0.01             |           |
| Q53GQ0       | Steroid dehydrogenase homolog (Fragment)                                 | 1          | 0.30             |           |
| Q9UJZ1       | Stomatin-like protein 2 (SLP-2) (EPB72-like 2)                           | 1          | 0.52             |           |
| P38646       | Stress-70 protein, mitochondrial precursor (75 kDa glucose regulated     | 1          | 0.31             |           |
| O95425       | Supervillin (Archvillin) (p205/p250)                                     | 3          | 0.39             | 0.31      |
| Q9NZ01       | Synaptic glycoprotein SC2                                                | 3          | 0.41             | 0.27      |



| Acc #  | Protein name                                                             | TPC | H/L ratio | SD   |
|--------|--------------------------------------------------------------------------|-----|-----------|------|
| Q5UIP0 | Telomere-associated protein RIF1 (Rap1-interacting factor 1 homolog)     | 1   | 0.07      |      |
| Q15006 | Tetratricopeptide repeat protein KIAA0103                                | 3   | 0.55      | 0.14 |
| P37173 | TGF-beta receptor type II precursor (EC 2.7.1.37) (TGFR-2) (TGF-beta     | 2   | 0.15      | 0.07 |
| Q9H0W7 | THAP domain-containing protein 2                                         | 5   | 0.30      | 0.09 |
| Q9H3N1 | Thioredoxin domain-containing protein 1 precursor (Transmembrane T       | 1   | 0.30      |      |
| Q6F5E7 | Thioredoxin reductase 2 intronic transcript 1                            | 1   | 0.22      |      |
| Q9Y2X0 | Thyroid hormone receptor-associated protein complex 95 kDa compon        | 1   | 0.16      |      |
| Q15643 | Thyroid receptor-interacting protein 11 (TRIP-11) (Golgi-associated mi   | 1   | 0.19      |      |
| O00463 | TNF receptor-associated factor 5 (RING finger protein 84)                | 1   | 0.27      |      |
| Q969E4 | Transcription elongation factor A (SII)-like 3 (MSTP072) (Hypothetical   | 1   | 0.37      |      |
| Q15369 | Transcription elongation factor B polypeptide 1 (RNA polymerase II tra   | 1   | 0.46      |      |
| Q9UGU0 | Transcription factor 20 (Stromelysin 1 PDGF-responsive element-bindi     | 1   | 2.37      |      |
| Q99551 | Transcription termination factor, mitochondrial precursor (mTERF) (Mit   | 1   | 0.44      |      |
| P02786 | Transferrin receptor protein 1 (TfR1) (TR) (TfR) (Trfr) (CD71 antigen) ( | 11  | 0.78      | 0.48 |
| Q9Y4A5 | Transformation/transcription domain-associated protein (350/400 kDa      | 1   | 0.88      |      |
| Q15629 | Translocation associated membrane protein 1                              | 5   | 0.50      | 0.27 |
| Q9UGP8 | Translocation protein SEC63 homolog                                      | 2   | 2.08      | 0.00 |
| P43307 | Translocon-associated protein alpha subunit precursor (TRAP-alpha) (     | 1   | 1.33      |      |
| P51571 | Translocon-associated protein delta subunit precursor (TRAP-delta) (S    | 5   | 0.34      | 0.08 |
| Q9UNL2 | Translocon-associated protein gamma subunit (TRAP-gamma) (Signal         | 2   | 0.18      | 0.06 |
| Q99805 | Transmembrane 9 superfamily protein member 2 precursor (p76)             | 1   | 0.65      |      |
| P84157 | Transmembrane anchor protein 1                                           | 3   | 0.36      | 0.29 |
| P49755 | Transmembrane emp24 domain containing protein 10 precursor (Tran         | 13  | 0.82      | 1.13 |
| Q7Z7H5 | Transmembrane emp24 domain containing protein 4 precursor                | 4   | 0.67      | 0.02 |
| Q9Y3A6 | Transmembrane emp24 domain containing protein 5 precursor                | 1   | 0.23      |      |
| Q9BVK6 | Transmembrane emp24 domain containing protein 9 precursor (Glyco         | 2   | 0.48      | 0.57 |
| P17152 | Transmembrane protein 11 (Protein PM1)                                   | 2   | 2.02      | 1.13 |
| P57088 | Transmembrane protein 33 (DB83 protein)                                  | 8   | 0.44      | 0.18 |
| Q96GC9 | Transmembrane protein 49 (TDC1)                                          | 1   | 0.41      |      |
| Q9HC07 | Transmembrane protein PT27 (TPA regulated locus)                         | 5   | 0.39      | 0.18 |

| Acc #  | Protein name                                                              | TPC | H/L ratio | SD   |
|--------|---------------------------------------------------------------------------|-----|-----------|------|
| P53007 | Tricarboxylate transport protein, mitochondrial precursor (Citrate trans  | 4   | 0.53      | 0.17 |
| Q8N6D1 | Triggering receptor expressed on myeloid cells 5                          | 1   | 0.23      |      |
| Q9UDY6 | Tripartite motif protein 10 (RING finger protein 9) (B30-RING finger pro  | 1   | 0.74      |      |
| Q6UWB4 | Tryptophan/serine protease                                                | 1   | 0.68      |      |
| P68366 | Tubulin alpha-1 chain (Alpha-tubulin 1) (Testis-specific alpha-tubulin) ( | 2   | 0.22      | 0.08 |
| Q14679 | Tubulin tyrosine ligase-like protein 4                                    | 1   | 0.34      |      |
| P23510 | Tumor necrosis factor ligand superfamily member 4 (OX40 ligand) (OX       | 1   | 1.83      |      |
| Q96RJ3 | Tumor necrosis factor receptor superfamily member 13C (B cell-activa      | 1   | 0.65      |      |
| Q561W0 | TXNDC14 protein                                                           | 5   | 0.33      | 0.13 |
| Q96PE3 | Type I inositol-3,4-bisphosphate 4-phosphatase (EC 3.1.3.66) (Inositol    | 3   | 0.19      | 0.05 |
| Q6RW13 | Type-1 angiotensin II receptor-associated protein (AT1 receptor-associ    | 1   | 0.94      |      |
| P18031 | Tyrosine-protein phosphatase, non-receptor type 1 (EC 3.1.3.48) (Prot     | 2   | 0.29      | 0.27 |
| P29074 | Tyrosine-protein phosphatase, non-receptor type 4 (EC 3.1.3.48) (Prot     | 1   | 0.57      |      |
| O75643 | U5 small nuclear ribonucleoprotein 200 kDa helicase (EC 3.6.1.-) (U5      | 1   | 0.04      |      |
| Q9UDW1 | Ubiquinol-cytochrome c reductase complex 7.2 kDa protein (EC 1.10.2       | 1   | 3.46      |      |
| O14949 | Ubiquinol-cytochrome c reductase complex ubiquinone-binding protein       | 3   | 0.31      | 0.27 |
| P22695 | Ubiquinol-cytochrome-c reductase complex core protein 2, mitochondri      | 10  | 0.61      | 0.16 |
| P31930 | Ubiquinol-cytochrome-c reductase complex core protein I, mitochondri      | 6   | 0.62      | 0.56 |
| Q9Y6I4 | Ubiquitin carboxyl-terminal hydrolase 3 (EC 3.1.2.15) (Ubiquitin thiolest | 1   | 0.18      |      |
| Q86T82 | Ubiquitin carboxyl-terminal hydrolase 37 (EC 3.1.2.15) (Ubiquitin thiole  | 1   | 15.67     |      |
| P45974 | Ubiquitin carboxyl-terminal hydrolase 5 (EC 3.1.2.15) (Ubiquitin thiolest | 1   | 1.60      |      |
| Q96EP1 | Ubiquitin ligase protein CHFR (EC 6.3.2.-) (Checkpoint with forkhead a    | 1   | 1.38      |      |
| Q86YT6 | Ubiquitin ligase protein MIB1 (EC 6.3.2.-) (Mind bomb homolog 1) (DA      | 1   | 0.65      |      |
| Q9Y385 | Ubiquitin-conjugating enzyme E2 J1 (EC 6.3.2.19) (Non-canonical ubiq      | 1   | 0.27      |      |
| O00124 | UBX domain-containing protein 6 (Rep-8 protein) (Reproduction 8 prot      | 1   | 0.64      |      |
| Q9Y3E0 | UPF0198 protein CGI-141                                                   | 1   | 0.31      |      |
| Q9P0I2 | UPF0347 protein LOC55831                                                  | 2   | 0.27      | 0.11 |
| P61421 | Vacuolar ATP synthase subunit d (EC 3.6.3.14) (V-ATPase d subunit)        | 3   | 0.21      | 0.14 |
| Q93050 | Vacuolar proton translocating ATPase 116 kDa subunit a isoform 1 (V-      | 2   | 1.16      | 0.06 |
| O75396 | Vesicle trafficking protein SEC22b (SEC22 vesicle trafficking protein-li  | 18  | 0.53      | 0.31 |

| <b>Acc #</b> | <b>Protein name</b>                                                   | <b>TPC</b> | <b>H/L ratio</b> | <b>SD</b> |
|--------------|-----------------------------------------------------------------------|------------|------------------|-----------|
| Q9P0L0       | Vesicle-associated membrane protein-associated protein A (VAMP-as     | 5          | 0.30             | 0.13      |
| Q12907       | Vesicular integral-membrane protein VIP36 precursor (GP36b glycopr    | 2          | 0.39             | 0.00      |
| P08670       | Vimentin                                                              | 3          | 0.35             | 0.06      |
| Q9BQB6       | Vitamin K epoxide reductase complex subunit 1 (EC 1.1.4.1) (Vitamin   | 1          | 0.37             |           |
| P21796       | Voltage-dependent anion-selective channel protein 1 (VDAC-1) (hVDA    | 32         | 0.60             | 0.33      |
| Q9Y277       | Voltage-dependent anion-selective channel protein 3 (VDAC-3) (hVDA    | 14         | 0.54             | 0.93      |
| Q96DN5       | WD-repeat protein 67                                                  | 1          | 0.04             |           |
| P30291       | Wee1-like protein kinase (EC 2.7.1.112) (WEE1hu)                      | 1          | 0.07             |           |
| P56705       | Wnt-4 protein precursor                                               | 1          | 0.27             |           |
| P49750       | YLP motif containing protein 1 (Nuclear protein ZAP3) (ZAP113)        | 1          | 105.27           |           |
| Q96GI9       | ZDHHC8 protein                                                        | 1          | 0.08             |           |
| Q7Z2W4       | Zinc finger CCCH type antiviral protein 1 (Zinc finger CCCH type doma | 1          | 1.06             |           |
| Q7Z3T8       | Zinc finger FYVE domain-containing protein 16 (Endofin) (Endosome-a   | 1          | 0.11             |           |
| O14978       | Zinc finger protein 263 (Zinc finger protein FPM315)                  | 1          | 0.47             |           |
| Q96RE9       | Zinc finger protein 300                                               | 1          | 0.10             |           |
| Q96PQ6       | Zinc finger protein 317                                               | 1          | 20.40            |           |
| Q9Y2H8       | Zinc finger protein 510                                               | 1          | 0.02             |           |
| Q96ME7       | Zinc finger protein 512                                               | 1          | 0.27             |           |
| Q9Y6M5       | Zinc transporter 1 (ZnT-1) (Solute carrier family 30 member 1)        | 1          | 0.30             |           |
