# Supplementary material
Source: PubMed Central journal article supplement (PMC3479679)
Supplement: NIHMS409433-supplement-Table_S2a.pdf [file NIHMS409433-supplement-Table_S2a.pdf]

**Supplemental Table S-2a. A list of 726 <sup>18</sup>O/<sup>16</sup>O labeled protein-specific peptides quantified by present algorithm, sorted by protein name.**

| <b>Acc No</b>                                                                                                | <b>Peptide</b>             | <b>MH+</b> | <b>z</b> | <b>f</b> | <b>H/L ratio</b> |
|--------------------------------------------------------------------------------------------------------------|----------------------------|------------|----------|----------|------------------|
| <b><i>26S proteasome non-ATPase regulatory subunit 1 (26S proteasome regulatory subunit RPN2)</i></b>        |                            |            |          |          |                  |
| Q99460                                                                                                       | R.NNNTDLMILK.N             | 1175.609   | 2        | 0.769    | 1.195            |
| Q99460                                                                                                       | R.QGALIASALIMIQQTEITC*PK.V | 2286.219   | 2        | 0.778    | 0.708            |
| <b><i>40S ribosomal protein S18 (Ke-3) (Ke3)</i></b>                                                         |                            |            |          |          |                  |
| P62269                                                                                                       | R.AGELTEDEVER.V            | 1247.575   | 2        | 0.652    | 0.571            |
| P62269                                                                                                       | R.AGELTEDEVER.V            | 1247.575   | 1        | 0.788    | 0.49             |
| <b><i>4F2 cell-surface antigen heavy chain (4F2hc) (Lymphocyte activation antigen 4F2 large subunit)</i></b> |                            |            |          |          |                  |
| P08195                                                                                                       | R.GENSWFSTQVDTVATK.V       | 1769.834   | 2        | 0.828    | 0.308            |
| P08195                                                                                                       | K.VAEDEAEAAAAAK.F          | 1245.596   | 1        | 0.549    | 1.461            |
| P08195                                                                                                       | K.GQSEDPGSLLSLFR.R         | 1505.759   | 2        | 0.8      | 0.444            |
| P08195                                                                                                       | K.GLVLGPIHK.N              | 933.588    | 1        | 0.685    | 0.528            |
| P08195                                                                                                       | K.VAEDEAEAAAAAK.F          | 1245.596   | 1        | 0.544    | 1.286            |
| P08195                                                                                                       | R.LDYLSLTK.V               | 938.519    | 2        | 0.998    | 0.177            |
| P08195                                                                                                       | K.DLLLTSSYLSDSGSTGEHTK.S   | 2111.014   | 2        | 0.618    | 0.951            |
| P08195                                                                                                       | K.EDFDSLLQSAK.K            | 1252.606   | 2        | 0.346    | 2.127            |
| P08195                                                                                                       | K.EVELNELEPEK.Q            | 1328.658   | 2        | 0.457    | 1.018            |
| P08195                                                                                                       | K.GQSEDPGSLLSLFR.R         | 1505.759   | 2        | 0.708    | 0.631            |
| P08195                                                                                                       | R.LDYLSLTK.V               | 938.519    | 1        | 0.385    | 0.782            |
| P08195                                                                                                       | K.GLVLGPIHK.N              | 933.588    | 2        | 0.544    | 0.507            |
| P08195                                                                                                       | K.ADLLLSTQPGR[E            | 1174.656   | 1        | 0.544    | 1.877            |
| P08195                                                                                                       | R.LDYLSLTK.V               | 938.519    | 1        | 0.435    | 0.556            |
| P08195                                                                                                       | K.DDVAQTDLLQIDPNFGSK.E     | 1975.961   | 2        | 0.74     | 0.457            |
| P08195                                                                                                       | K.VAEDEAEAAAAAK.F          | 1245.596   | 2        | 0.421    | 0.891            |
| P08195                                                                                                       | K.ADLLLSTQPGREEGSPLELER.L  | 2310.194   | 2        | 0.496    | 3.484            |
| P08195                                                                                                       | K.GQSEDPGSLLSLFR[R         | 1509.767   | 1        | 0.589    | 1.07             |
| P08195                                                                                                       | R.WC*SWSLSQAR.L            | 1280.584   | 2        | 0.746    | 0.58             |
| P08195                                                                                                       | K.ADLLLSTQPGR.E            | 1170.648   | 1        | 0.591    | 1.162            |
| P08195                                                                                                       | K.EVELNELEPEK.Q            | 1328.658   | 1        | 0.529    | 0.129            |
| P08195                                                                                                       | R.VILDTPNYR[G              | 1207.681   | 1        | 0.883    | 0.424            |
| P08195                                                                                                       | K.EDFDSLLQSAK.K            | 1252.606   | 2        | 0.33     | 1.952            |
| P08195                                                                                                       | K.ADLLLSTQPGR.E            | 1170.648   | 2        | 1        | 0.312            |
| P08195                                                                                                       | K.EDFDSLLQSAK.K            | 1252.606   | 2        | 0.403    | 1.972            |
| P08195                                                                                                       | R.EEGSPLELER[L             | 1162.572   | 1        | 0.557    | 0.845            |

| Acc No                                                                                                               | Peptide                   | MH+      | z | f     | H/L ratio |
|----------------------------------------------------------------------------------------------------------------------|---------------------------|----------|---|-------|-----------|
| P08195                                                                                                               | K.GQSEDPGSLLSLFR.R        | 1505.759 | 2 | 0.831 | 0.535     |
| P08195                                                                                                               | K.EVELNELEPEK.Q           | 1328.658 | 1 | 0.499 | 0.315     |
| P08195                                                                                                               | K.EVELNELEPEK.Q           | 1328.658 | 2 | 0.43  | 1.091     |
| P08195                                                                                                               | R.LDYLSLTK.V              | 938.519  | 2 | 0.498 | 0.383     |
| P08195                                                                                                               | R.LDYLSLTK.V              | 938.519  | 2 | 0.422 | 0.485     |
| P08195                                                                                                               | K.ADLLLSTQPGR.E           | 1170.648 | 2 | 0.83  | 0.466     |
| P08195                                                                                                               | K.GLVLGPIHK.N             | 933.588  | 1 | 0.595 | 0.656     |
| P08195                                                                                                               | K.EDFDSLLQSAK.K           | 1252.606 | 1 | 0.796 | 0.468     |
| P08195                                                                                                               | K.ADLLLSTQPGREEGSPLELER.L | 2310.194 | 2 | 0.386 | 2.408     |
| P08195                                                                                                               | K.EDFDSLLQSAK.K           | 1252.606 | 2 | 0.533 | 1.467     |
| P08195                                                                                                               | K.SLVTQYLNATGNR.W         | 1436.749 | 2 | 0.738 | 0.356     |
| P08195                                                                                                               | K.ADLLLSTQPGR.E           | 1170.648 | 2 | 0.806 | 0.562     |
| P08195                                                                                                               | K.EVELNELEPEK.Q           | 1328.658 | 2 | 0.438 | 3.07      |
| P08195                                                                                                               | K.EDFDSLLQSAK.K           | 1252.606 | 1 | 0.863 | 0.333     |
| P08195                                                                                                               | K.GLVLGPIHK.N             | 933.588  | 2 | 0.657 | 0.333     |
| P08195                                                                                                               | K.EDFDSLLQSAK.K           | 1252.606 | 1 | 0.98  | 0.274     |
| P08195                                                                                                               | R.IGDLQAFQGHGAGNLAGLK.G   | 1866.982 | 3 | 0.611 | 0.804     |
| P08195                                                                                                               | K.ADLLLSTQPGR.E           | 1170.648 | 1 | 0.565 | 1.815     |
| <b><i>60S ribosomal protein L18</i></b>                                                                              |                           |          |   |       |           |
| Q07020                                                                                                               | K.ILTFDQLALDSPK.G         | 1460.8   | 2 | 0.702 | 1.487     |
| Q07020                                                                                                               | K.ILTFDQLALDSPK.G         | 1460.8   | 2 | 0.688 | 0.926     |
| <b><i>60S ribosomal protein L18a</i></b>                                                                             |                           |          |   |       |           |
| Q02543                                                                                                               | R.DLTTAGAVTQC*YR.D        | 1455.69  | 2 | 0.959 | 0.362     |
| <b><i>60S ribosomal protein L23 (Ribosomal protein L17)</i></b>                                                      |                           |          |   |       |           |
| P62829                                                                                                               | R.ISLGLPVGAVINC*ADNTGAK.N | 1970.037 | 2 | 0.691 | 1.105     |
| <b><i>60S ribosomal protein L31</i></b>                                                                              |                           |          |   |       |           |
| P62899                                                                                                               | K.LYTLVTVVPVTTFK.N        | 1644.925 | 2 | 0.557 | 0.933     |
| <b><i>60S ribosomal protein L36a (60S ribosomal protein L44) (Migration-inducing gene 6 protein)</i></b>             |                           |          |   |       |           |
| P83881                                                                                                               | K.DSLYAQGK.R              | 881.436  | 1 | 0.664 | 1.149     |
| <b><i>60S ribosomal protein L4 (L1)</i></b>                                                                          |                           |          |   |       |           |
| P36578                                                                                                               | R.IEEVPELPLVVEDK.V        | 1608.873 | 2 | 0.548 | 0.749     |
| <b><i>78 kDa glucose-regulated protein precursor (GRP 78) (Immunoglobulin heavy chain binding protein) (BiP)</i></b> |                           |          |   |       |           |
| P11021                                                                                                               | K.VLESDLK.K               | 918.478  | 1 | 0.513 | 0.361     |
| P11021                                                                                                               | K.NQLTSNPENTVFDK.R        | 1677.808 | 2 | 0.463 | 8.479     |

| <b>Acc No</b>                                                                                                          | <b>Peptide</b>        | <b>MH+</b> | <b>z</b> | <b>f</b> | <b>H/L ratio</b> |
|------------------------------------------------------------------------------------------------------------------------|-----------------------|------------|----------|----------|------------------|
| <b><i>Acetyl-coenzyme A transporter 1 (AT-1) (Acetyl-CoA transporter) (Solute carrier family 33 member 1)</i></b>      |                       |            |          |          |                  |
| O00400                                                                                                                 | R.EALLGDTGTGDFLK.A    | 1436.727   | 2        | 0.734    | 0.605            |
| <b><i>Adenosine 3'-phospho 5'-phosphosulfate transporter 1 (PAPS transporter 1) (Solute carrier family 35)</i></b>     |                       |            |          |          |                  |
| Q8TB61                                                                                                                 | K.ASDEVPLAPR.T        | 1054.553   | 1        | 0.925    | 1.76             |
| Q8TB61                                                                                                                 | K.FVSFPTQVLAK.A       | 1236.699   | 2        | 0.79     | 0.482            |
| Q8TB61                                                                                                                 | K.ASDEVPLAPR.T        | 1054.553   | 2        | 0.618    | 0.57             |
| <b><i>ADP/ATP translocase 1 (Adenine nucleotide translocator 1) (ANT 1) (ADP,ATP carrier protein 1)</i></b>            |                       |            |          |          |                  |
| <b>(Solute</b>                                                                                                         |                       |            |          |          |                  |
| P12235                                                                                                                 | K.DFLAGGVAAAIVSK.T    | 1205.652   | 2        | 0.648    | 0.654            |
| <b><i>ADP/ATP translocase 2 (Adenine nucleotide translocator 2) (ANT 2) (ADP,ATP carrier protein 2)</i></b>            |                       |            |          |          |                  |
| <b>(Solute</b>                                                                                                         |                       |            |          |          |                  |
| P05141                                                                                                                 | K.DFLAGGVAAAISK.T     | 1219.668   | 1        | 0.7      | 1.105            |
| P05141                                                                                                                 | R.AAYFGIYDTAK.G       | 1219.599   | 2        | 0.597    | 0.408            |
| P05141                                                                                                                 | R.AAYFGIYDTAK.G       | 1219.599   | 2        | 0.408    | 0.738            |
| P05141                                                                                                                 | R.AAYFGIYDTAK.G       | 1219.599   | 2        | 0.736    | 0.286            |
| P05141                                                                                                                 | K.DFLAGGVAAAISK.T     | 1219.668   | 2        | 0.773    | 0.329            |
| P05141                                                                                                                 | K.DFLAGGVAAAISK.T     | 1219.668   | 2        | 0.82     | 0.309            |
| <b><i>Alkyldihydroxyacetonephosphate synthase, peroxisomal precursor (EC 2.5.1.26) (Alkyl-DHAP synthase)</i></b>       |                       |            |          |          |                  |
| O00116                                                                                                                 | R.GISDPLTVFEQTEAAAR.E | 1804.908   | 2        | 0.618    | 1.174            |
| <b><i>Alpha-1,2-mannosyltransferase ALG9 (EC 2.4.1.-) (Asparagine-linked glycosylation protein 9 homolog)</i></b>      |                       |            |          |          |                  |
| Q9H6U8                                                                                                                 | R.IVPTDMNDQNLEEPSR.Y  | 1857.865   | 2        | 0.976    | 0.293            |
| <b><i>Alpha-fetoprotein enhancer binding protein (AT motif-binding factor) (AT-binding transcription factor 1)</i></b> |                       |            |          |          |                  |
| Q15911                                                                                                                 | R.PHEEPGAAAGSSSK[K    | 1328.621   | 2        | 0.836    | 1.926            |
| <b><i>Aspartyl(Asparaginyl)beta-hydroxylase</i></b>                                                                    |                       |            |          |          |                  |
| Q9Y4J0                                                                                                                 | K.EGIESGDPGTDDGR.F    | 1404.587   | 2        | 0.429    | 0.573            |
| <b><i>ATP synthase alpha chain, mitochondrial precursor (EC 3.6.3.14)</i></b>                                          |                       |            |          |          |                  |
| P25705                                                                                                                 | R.VLSIGDGIAR.V        | 1000.579   | 2        | 0.566    | 0.682            |
| P25705                                                                                                                 | K.AVDSLVPPIGR.G       | 1026.594   | 2        | 0.907    | 0.385            |
| P25705                                                                                                                 | R.FNDGSDEK.K          | 911.374    | 1        | 0.588    | 0.931            |
| P25705                                                                                                                 | R.FNDGSDEK.K          | 911.374    | 2        | 0.892    | 0.616            |
| P25705                                                                                                                 | R.ELIIGDR[.Q          | 819.47     | 1        | 0.602    | 0.464            |
| P25705                                                                                                                 | K.LELAQYR.E           | 892.489    | 1        | 0.673    | 1.906            |
| P25705                                                                                                                 | K.TGTAEMSSILEER.I     | 1423.673   | 2        | 0.489    | 1.226            |
| P25705                                                                                                                 | R.TGAIVDVPVGEELLGR[V  | 1628.899   | 2        | 0.546    | 0.848            |
| P25705                                                                                                                 | R.EPMQTGIK.A          | 903.46     | 1        | 0.964    | 1.885            |
| P25705                                                                                                                 | R.ELIIGDR.Q           | 815.462    | 1        | 0.688    | 0.421            |

| Acc No                                                                                                                 | Peptide                 | MH+      | z | f     | H/L ratio |
|------------------------------------------------------------------------------------------------------------------------|-------------------------|----------|---|-------|-----------|
| P25705                                                                                                                 | K.AVDSLVPIGR.G          | 1026.594 | 1 | 0.986 | 0.59      |
| <b><i>ATP synthase beta chain, mitochondrial precursor (EC 3.6.3.14)</i></b>                                           |                         |          |   |       |           |
| P06576                                                                                                                 | R.IMNVIGEPIDER[G        | 1389.717 | 2 | 0.945 | 0.515     |
| P06576                                                                                                                 | K.VALVYQGMNEPPGAR.A     | 1601.81  | 2 | 0.483 | 0.93      |
| P06576                                                                                                                 | K.VLDSGAPIKIPVGPETLGR.I | 1919.096 | 2 | 0.425 | 1.247     |
| P06576                                                                                                                 | K.IPVGPETLGR.I          | 1038.594 | 1 | 0.886 | 0.44      |
| P06576                                                                                                                 | R.AIAELGIYPAVDPLDSTSR.I | 1988.033 | 2 | 0.475 | 1.208     |
| <b><i>ATP synthase coupling factor 6, mitochondrial precursor (EC 3.6.3.14) (ATPase subunit F6)</i></b>                |                         |          |   |       |           |
| P18859                                                                                                                 | R.QTSGGPVDASSEYQQELER.E | 2080.942 | 2 | 0.979 | 0.912     |
| <b><i>ATP synthase D chain, mitochondrial (EC 3.6.3.14)</i></b>                                                        |                         |          |   |       |           |
| O75947                                                                                                                 | K.AGLVDDFEK.K           | 993.489  | 1 | 0.528 | 0.28      |
| O75947                                                                                                                 | K.AGLVDDFEK.K           | 993.489  | 2 | 0.314 | 0.757     |
| O75947                                                                                                                 | K.AGLVDDFEK.K           | 993.489  | 1 | 0.829 | 0.11      |
| <b><i>ATP synthase delta chain, mitochondrial precursor (EC 3.6.3.14)</i></b>                                          |                         |          |   |       |           |
| P30049                                                                                                                 | K.AQAELVGTADEATR[A      | 1435.715 | 2 | 0.845 | 1.069     |
| <b><i>ATP synthase g chain, mitochondrial (EC 3.6.3.14) (ATPase subunit G)</i></b>                                     |                         |          |   |       |           |
| O75964                                                                                                                 | K.IVNSAQTGSFK.Q         | 1151.605 | 2 | 0.378 | 0.7       |
| O75964                                                                                                                 | K.IVNSAQTGSFK[.Q        | 1155.614 | 1 | 0.725 | 0.439     |
| <b><i>ATP synthase gamma chain, mitochondrial precursor (EC 3.6.3.14)</i></b>                                          |                         |          |   |       |           |
| P36542                                                                                                                 | K.EVMLVGIGDK.I          | 1060.571 | 1 | 0.975 | 0.122     |
| P36542                                                                                                                 | K.EVMLVGIGDK.I          | 1060.571 | 1 | 0.978 | 0.244     |
| <b><i>ATP synthase O subunit, mitochondrial precursor (EC 3.6.3.14) (Oligomycin sensitivity conferral protein)</i></b> |                         |          |   |       |           |
| P48047                                                                                                                 | K.SFLSQGQVLK[L          | 1110.628 | 2 | 0.813 | 0.939     |
| P48047                                                                                                                 | K.SFLSQGQVLK.L          | 1106.62  | 2 | 0.843 | 1.328     |
| P48047                                                                                                                 | K.SFLSQGQVLK.L          | 1106.62  | 1 | 0.688 | 0.466     |
| P48047                                                                                                                 | K.VAASVLNYPVK.R         | 1160.667 | 2 | 0.941 | 0.152     |
| <b><i>ATPase family AAA domain containing protein 1</i></b>                                                            |                         |          |   |       |           |
| Q8NBU5                                                                                                                 | K.DTVILPIK.K            | 898.561  | 1 | 0.8   | 0.107     |
| <b><i>ATP-binding cassette sub-family D member 1 (Adrenoleukodystrophy protein) (ALDP)</i></b>                         |                         |          |   |       |           |
| P33897                                                                                                                 | R.NLLTAAADAIER.I        | 1257.68  | 2 | 0.615 | 0.311     |
| P33897                                                                                                                 | K.DAGIALLSITHR.P        | 1266.717 | 2 | 0.453 | 0.707     |
| P33897                                                                                                                 | R.TAVLLALAAYGAHK.V      | 1398.81  | 2 | 0.717 | 0.488     |
| <b><i>ATP-binding cassette sub-family D member 3 (70 kDa peroxisomal membrane protein) (PMP70)</i></b>                 |                         |          |   |       |           |
| P28288                                                                                                                 | R.DLNFEVR.S             | 892.452  | 1 | 0.632 | 2.046     |

| <b>Acc No</b>                                                                                                      | <b>Peptide</b>        | <b>MH+</b> | <b>z</b> | <b>f</b> | <b>H/L ratio</b> |
|--------------------------------------------------------------------------------------------------------------------|-----------------------|------------|----------|----------|------------------|
| P28288                                                                                                             | R.DQVIYPDGR.E         | 1062.521   | 2        | 0.628    | 0.84             |
| P28288                                                                                                             | R.DLNFEVR.S           | 892.452    | 2        | 0.542    | 0.531            |
| <b><i>ATP-binding cassette sub-family G member 2 (Placenta-specific ATP-binding cassette transporter)</i></b>      |                       |            |          |          |                  |
| <b><i>(Breast)</i></b>                                                                                             |                       |            |          |          |                  |
| Q9UNQ0                                                                                                             | R.VIQELGLDK.V         | 1014.583   | 1        | 0.456    | 0.242            |
| Q9UNQ0                                                                                                             | K.PGLNAILGPTGGGK.S    | 1251.706   | 2        | 0.784    | 1.167            |
| Q9UNQ0                                                                                                             | K.VGTQFIR.G           | 820.468    | 1        | 0.766    | 1.229            |
| Q9UNQ0                                                                                                             | K.VGTQFIR.G           | 820.468    | 1        | 0.866    | 1.396            |
| Q9UNQ0                                                                                                             | K.ATEIIIEPSK.Q        | 987.536    | 1        | 0.463    | 0.38             |
| Q9UNQ0                                                                                                             | K.ATEIIIEPSK.Q        | 987.536    | 1        | 0.403    | 0.345            |
| Q9UNQ0                                                                                                             | K.SSLLDVLAAR[.K       | 1048.613   | 1        | 0.893    | 0.525            |
| Q9UNQ0                                                                                                             | R.VIQELGLDK.V         | 1014.583   | 1        | 0.659    | 0.129            |
| <b><i>Autophagy protein 3-like (APG3-like) (hApg3) (PC3-96 protein)</i></b>                                        |                       |            |          |          |                  |
| Q9NT62                                                                                                             | R.TYDLYITYDKYYQTPR[.L | 2107.015   | 2        | 0.716    | 0.831            |
| <b><i>BAG family molecular chaperone regulator 2 (BCL2-associated athanogene 2) (BAG-2)</i></b>                    |                       |            |          |          |                  |
| O95816                                                                                                             | R.LLESLDQLELR.V       | 1328.742   | 2        | 0.61     | 1.303            |
| O95816                                                                                                             | K.TLQQNAESR.F         | 1046.522   | 1        | 0.6      | 1.825            |
| <b><i>Bardet-Biedl syndrome 2 protein</i></b>                                                                      |                       |            |          |          |                  |
| Q9BXC9                                                                                                             | R.NYEENAK.A           | 867.384    | 1        | 0.826    | 0.173            |
| <b><i>Basigin precursor (CD147 antigen) (Leukocyte activation antigen M6) (Collagenase stimulatory factor)</i></b> |                       |            |          |          |                  |
| P35613                                                                                                             | R.FFVSSSQGR.S         | 1014.5     | 1        | 0.573    | 1.001            |
| P35613                                                                                                             | K.EDALPGQK.T          | 857.436    | 1        | 0.801    | 0.571            |
| P35613                                                                                                             | K.EDALPGQK.T          | 857.436    | 1        | 0.719    | 0.506            |
| <b><i>B-cell lymphoma/leukemia 11B (B-cell CLL/lymphoma 11B) (Radiation-induced tumor suppressor gene 1)</i></b>   |                       |            |          |          |                  |
| Q9C0K0                                                                                                             | R.GGGFAPGTEPFPGLPFR.K | 1703.854   | 2        | 0.627    | 0.404            |
| <b><i>B-cell receptor-associated protein 29 (BCR-associated protein Bap29)</i></b>                                 |                       |            |          |          |                  |
| Q9UHQ4                                                                                                             | K.EYDQLLK.E           | 908.472    | 1        | 0.667    | 0.425            |
| Q9UHQ4                                                                                                             | K.EYDQLLK.E           | 908.472    | 1        | 0.682    | 0.621            |
| <b><i>B-cell receptor-associated protein 31 (BCR-associated protein Bap31) (p28 Bap31) (CDM protein)</i></b>       |                       |            |          |          |                  |
| <b><i>(6C6-AG)</i></b>                                                                                             |                       |            |          |          |                  |
| P51572                                                                                                             | K.LDVGNAEVK.L         | 944.505    | 2        | 0.58     | 0.894            |
| P51572                                                                                                             | K.LDVGNAEVK[.L        | 948.513    | 2        | 0.553    | 0.67             |
| P51572                                                                                                             | K.LQAAVDGPMDDK.K      | 1144.567   | 1        | 0.328    | 0.361            |
| P51572                                                                                                             | K.LDVGNAEVK.L         | 944.505    | 2        | 0.428    | 1.206            |
| P51572                                                                                                             | K.DELASTK[.Q          | 767.391    | 1        | 0.552    | 1.583            |
| <b><i>Beta-2-microglobulin precursor [Contains: Beta-2-microglobulin variant pI 5.3]</i></b>                       |                       |            |          |          |                  |

| Acc No                                                                                                            | Peptide                 | MH+      | z | f     | H/L ratio |
|-------------------------------------------------------------------------------------------------------------------|-------------------------|----------|---|-------|-----------|
| P61769                                                                                                            | R.VNHVTLTSLQPK[I]       | 1126.635 | 2 | 0.742 | 0.845     |
| <b>Brain acid soluble protein 1 (BASPI protein) (Neuronal axonal membrane protein NAP-22) (22 kDa)</b>            |                         |          |   |       |           |
| P80723                                                                                                            | K.ETPAATEAPSSTPK.A      | 1386.675 | 2 | 0.686 | 0.602     |
| P80723                                                                                                            | K.APEQEQAAPGPAAGGEAPK.A | 1775.856 | 2 | 0.646 | 0.749     |
| P80723                                                                                                            | K.ESEPAQAAAEPAAEK.E     | 1427.665 | 2 | 0.789 | 0.309     |
| P80723                                                                                                            | K.AEGAATEEEGTPK.E       | 1289.586 | 1 | 0.994 | 0.122     |
| <b>Brefeldin A-inhibited guanine nucleotide-exchange protein 1 (Brefeldin A-inhibited GEP 1) (p200 ARF-</b>       |                         |          |   |       |           |
| Q9Y6D6                                                                                                            | K.FPEQKLFALLIK[C]       | 1521.917 | 2 | 0.789 | 1.245     |
| <b>C-4 methylsterol oxidase (EC 1.14.13.72) (Methylsterol monooxygenase)</b>                                      |                         |          |   |       |           |
| Q15800                                                                                                            | R.IFGTDSQYNAYNEK.R      | 1649.744 | 2 | 0.983 | 0.485     |
| <b>CAAX prenyl protease 1 homolog (EC 3.4.24.84) (Prenyl protein-specific endoprotease 1) (Farnesylated)</b>      |                         |          |   |       |           |
| O75844                                                                                                            | K.VYVVEGSK.R            | 880.477  | 1 | 0.574 | 0.654     |
| O75844                                                                                                            | K.VYVVEGSK.R            | 880.477  | 1 | 0.488 | 0.81      |
| <b>Calcium-transporting ATPase type 2C member 1 (EC 3.6.3.8) (ATPase 2C1) (ATP-dependent Ca(2+) pump)</b>         |                         |          |   |       |           |
| P98194                                                                                                            | K.YISQFK.N              | 785.419  | 1 | 0.597 | 1.027     |
| <b>Calnexin precursor (Major histocompatibility complex class I antigen-binding protein p88) (p90) (IP90)</b>     |                         |          |   |       |           |
| P27824                                                                                                            | K.AEEDEILNR.S           | 1088.522 | 1 | 0.662 | 0.509     |
| <b>CAMP/cGMP cyclic nucleotide phosphodiesterase 11A3</b>                                                         |                         |          |   |       |           |
| Q9GZY7                                                                                                            | K.ITRLVQISGASLAEKQEK.H  | 1971.123 | 2 | 0.324 | 0.941     |
| <b>Carbamoyl-phosphate synthase [ammonia], mitochondrial precursor (EC 6.3.4.16) (Carbamoyl-phosphate)</b>        |                         |          |   |       |           |
| P31327                                                                                                            | K.IEFEGQPVDFVDPNK.Q     | 1733.838 | 2 | 0.482 | 0.722     |
| <b>Carnitine O-palmitoyltransferase I, mitochondrial liver isoform (EC 2.3.1.21) (CPT I) (CPTI-L) (Carnitine)</b> |                         |          |   |       |           |
| P50416                                                                                                            | R.SEDPDTSMDSYAK.S       | 1445.574 | 2 | 0.633 | 0.495     |
| <b>CD59 glycoprotein precursor (Membrane attack complex inhibition factor) (MACIF) (MAC-inhibitory)</b>           |                         |          |   |       |           |
| P13987                                                                                                            | K.AGLQVYNK.C            | 892.489  | 1 | 0.583 | 1.979     |
| <b>Cell division cycle 5-like protein (Cdc5-like protein) (Pombe cdc5-related protein)</b>                        |                         |          |   |       |           |
| Q99459                                                                                                            | R.YTRANLASK.K           | 1023.558 | 1 | 0.666 | 0.431     |
| <b>Centaurin-beta 2 (Cnt-b2)</b>                                                                                  |                         |          |   |       |           |
| Q15057                                                                                                            | -.MKMTVDFEELKDSR.F      | 1928.891 | 2 | 0.829 | 0.207     |
| <b>Chemokine-binding protein 2 (Chemokine-binding protein D6) (C-C chemokine receptor D6) (Chemokine)</b>         |                         |          |   |       |           |
| O00590                                                                                                            | R.IGCVLVRLR.P           | 1028.64  | 1 | 0.624 | 2.239     |
| <b>Chromosome 6 open reading frame 37</b>                                                                         |                         |          |   |       |           |
| Q5TF85                                                                                                            | K.STEDIFPAQLLKLQR[H]    | 1762.983 | 2 | 0.688 | 5.137     |



| Acc No                                                                                                        | Peptide                  | MH+      | z | f     | H/L ratio |
|---------------------------------------------------------------------------------------------------------------|--------------------------|----------|---|-------|-----------|
| <b><i>Clathrin heavy chain 1 (CLH-17)</i></b>                                                                 |                          |          |   |       |           |
| Q00610                                                                                                        | K.NNRPSEGPLQTR.L         | 1368.698 | 2 | 0.559 | 2.652     |
| Q00610                                                                                                        | R.TSIDAYDNFDNISLAQR.L    | 1942.914 | 2 | 0.421 | 1.088     |
| <b><i>CMP-sialic acid transporter</i></b>                                                                     |                          |          |   |       |           |
| Q5W1L8                                                                                                        | R.QDTTSIQQGETASK.E       | 1493.708 | 2 | 0.865 | 1.687     |
| <b><i>Coiled-coil-helix-coiled-coil-helix domain containing protein 3</i></b>                                 |                          |          |   |       |           |
| Q9NX63                                                                                                        | R.VAEELALEQAK.K          | 1200.647 | 1 | 0.75  | 0.81      |
| Q9NX63                                                                                                        | R.VTTEQYQK[A             | 1000.508 | 1 | 0.567 | 0.852     |
| Q9NX63                                                                                                        | R.VAEELALEQAK[K          | 1204.655 | 1 | 0.775 | 0.588     |
| Q9NX63                                                                                                        | R.VAEELALEQAK[K          | 1204.655 | 2 | 0.752 | 1.382     |
| <b><i>Collagen alpha 1(VII) chain precursor (Long-chain collagen) (LC collagen)</i></b>                       |                          |          |   |       |           |
| Q02388                                                                                                        | R.GPEASVTQTPVCPR.G       | 1441.71  | 2 | 0.851 | 0.465     |
| <b><i>Complement component 1, Q subcomponent binding protein, mitochondrial precursor (Glycoprotein)</i></b>  |                          |          |   |       |           |
| Q07021                                                                                                        | K.VEEQEPELTSTPNFVVEVIK.N | 2287.17  | 2 | 0.831 | 0.706     |
| Q07021                                                                                                        | K.AFVDFLSDEIK.E          | 1283.652 | 2 | 0.53  | 0.191     |
| Q07021                                                                                                        | K.AFVDFLSDEIK.E          | 1283.652 | 2 | 0.632 | 0.227     |
| <b><i>Core1 UDP-galactose:N-acetylgalactosamine-alpha-R beta 1,3-galactosyltransferase (EC 2.4.1.122)</i></b> |                          |          |   |       |           |
| Q9NS00                                                                                                        | K.DENTDIAENLYQK[V        | 1556.721 | 2 | 0.764 | 0.236     |
| <b><i>Cytochrome c oxidase polypeptide Va, mitochondrial precursor (EC 1.9.3.1)</i></b>                       |                          |          |   |       |           |
| P20674                                                                                                        | K.IIDAALR.A              | 771.472  | 1 | 0.711 | 0.866     |
| <b><i>Cytochrome c oxidase polypeptide Vb, mitochondrial precursor (EC 1.9.3.1)</i></b>                       |                          |          |   |       |           |
| P10606                                                                                                        | R.EDPNLVPSISNK.R         | 1312.674 | 2 | 0.327 | 0.537     |
| P10606                                                                                                        | K.GLDPYNVLAPK.G          | 1186.647 | 2 | 0.655 | 0.576     |
| P10606                                                                                                        | R.EDPNLVPSISNK.R         | 1312.674 | 2 | 0.315 | 1.274     |
| <b><i>Cytochrome c oxidase polypeptide VIc precursor (EC 1.9.3.1)</i></b>                                     |                          |          |   |       |           |
| P09669                                                                                                        | K.AYADFYR.N              | 905.415  | 1 | 0.734 | 0.695     |
| P09669                                                                                                        | K.DFEEMR[K               | 830.348  | 1 | 0.516 | 0.716     |
| P09669                                                                                                        | K.AGIFQSVK.-             | 849.483  | 2 | 0.792 | 0.574     |
| <b><i>Cytochrome c oxidase polypeptide VIIa-liver/heart, mitochondrial precursor (EC 1.9.3.1)</i></b>         |                          |          |   |       |           |
| <b><i>(Cytochrome c</i></b>                                                                                   |                          |          |   |       |           |
| P14406                                                                                                        | K.GGVADALLYR.A           | 1034.563 | 1 | 0.642 | 0.715     |
| P14406                                                                                                        | K.GGVADALLYR.A           | 1034.563 | 1 | 0.507 | 1.636     |
| <b><i>Cytochrome c oxidase subunit IV isoform 1, mitochondrial precursor (EC 1.9.3.1) (COX IV-1)</i></b>      |                          |          |   |       |           |
| P13073                                                                                                        | K.VNPIQGLASK.W           | 1026.594 | 2 | 0.609 | 0.562     |
| P13073                                                                                                        | K.VNPIQGLASK[W           | 1030.602 | 1 | 0.855 | 0.87      |



| Acc No                                                                                                                 | Peptide                  | MH+      | z | f     | H/L ratio |
|------------------------------------------------------------------------------------------------------------------------|--------------------------|----------|---|-------|-----------|
| P13073                                                                                                                 | K.VNPIQGLASK.W           | 1026.594 | 1 | 0.567 | 0.974     |
| <b><i>Cytochrome c oxidase subunit VIIa-related protein, mitochondrial precursor (COX7a-related protein) (EBI)</i></b> |                          |          |   |       |           |
| O14548                                                                                                                 | K.LTSDSTVVDYAGK.N        | 1419.664 | 2 | 0.981 | 0.271     |
| <b><i>Cytochrome c1, heme protein, mitochondrial precursor (Cytochrome c-1)</i></b>                                    |                          |          |   |       |           |
| P08574                                                                                                                 | K.LFDYFPK.P              | 929.477  | 1 | 0.989 | 0.159     |
| P08574                                                                                                                 | K.LFDYFPKPYPNSEAAR.A     | 1914.938 | 2 | 0.89  | 0.959     |
| P08574                                                                                                                 | K.PYPNSEAAR.A            | 1004.48  | 1 | 0.536 | 0.793     |
| <b><i>Cytochrome c-type heme lyase (EC 4.4.1.17) (CCHL) (Holocytochrome c-type synthase)</i></b>                       |                          |          |   |       |           |
| P53701                                                                                                                 | K.GC*PVNTEPSGPTC*EK.K    | 1632.699 | 2 | 0.737 | 0.511     |
| <b><i>Cytosolic 5'-nucleotidase 1B (EC 3.1.3.5) (Cytosolic 5'-nucleotidase 1B) (cN1B) (cN-1B) (Autoimmune)</i></b>     |                          |          |   |       |           |
| Q96P26                                                                                                                 | K.LPSSSTSSR.T            | 921.464  | 1 | 0.647 | 0.904     |
| <b><i>Defender against cell death 1 (DAD-1)</i></b>                                                                    |                          |          |   |       |           |
| P61803                                                                                                                 | K.ADFQGISPER.A           | 1119.543 | 2 | 0.893 | 0.164     |
| <b><i>Dehydrogenase E1 and transketolase domain containing protein 1</i></b>                                           |                          |          |   |       |           |
| Q96HY7                                                                                                                 | R.IGGSVHLIVNQLGYTTPAER.G | 2239.183 | 2 | 0.45  | 1.612     |
| <b><i>Dehydrogenase/reductase SDR family member 8 precursor (EC 1.1.1.-) (17-beta-hydroxysteroid)</i></b>              |                          |          |   |       |           |
| Q8NBQ5                                                                                                                 | K.FDAVIGYK.M             | 912.482  | 1 | 0.423 | 0.276     |
| Q8NBQ5                                                                                                                 | R.EDIYSSAK.K             | 912.431  | 1 | 0.759 | 0.687     |
| <b><i>DEP domain containing 6</i></b>                                                                                  |                          |          |   |       |           |
| Q8TB45                                                                                                                 | R.KDDGTFPLDNEVK[A        | 1481.725 | 2 | 0.733 | 0.844     |
| <b><i>Dermcidin precursor (Preproteolysin) [Contains: Survival-promoting peptide; DCD-1]</i></b>                       |                          |          |   |       |           |
| P81605                                                                                                                 | K.ENAGEDPGLAR[.Q         | 1132.536 | 2 | 0.814 | 1.183     |
| <b><i>Desmoplakin (DP) (250/210 kDa paraneoplastic pemphigus antigen)</i></b>                                          |                          |          |   |       |           |
| P15924                                                                                                                 | K.GFFDPNTEENLTYLQLK.E    | 2028.991 | 2 | 0.301 | 2.116     |
| <b><i>DNA nucleotidylexotransferase (EC 2.7.7.31) (Terminal addition enzyme) (Terminal)</i></b>                        |                          |          |   |       |           |
| P04053                                                                                                                 | K.MILDNHALYDKTK.R        | 1561.804 | 2 | 0.951 | 0.363     |
| <b><i>DnaJ (Hsp40) homolog, subfamily D, member 1 (Growth-inhibiting 22) (DNAJ domain-containing)</i></b>              |                          |          |   |       |           |
| Q5T219                                                                                                                 | K.DLLETTTK.H             | 920.494  | 1 | 0.352 | 0.676     |
| <b><i>Dolichyl-diphosphooligosaccharide-protein glycosyltransferase</i></b>                                            |                          |          |   |       |           |
| Q5VWA5                                                                                                                 | R.ELGSEC*GIEFDEEK.T      | 1641.695 | 2 | 0.557 | 0.507     |
| Q5VWA5                                                                                                                 | K.SSLNPILFR.G            | 1046.599 | 2 | 0.64  | 0.471     |
| Q5VWA5                                                                                                                 | K.SSLNPILFR[.G           | 1050.607 | 1 | 0.547 | 1.745     |
| Q5VWA5                                                                                                                 | K.NTLIAGLQAR.N           | 1169.7   | 1 | 0.849 | 0.581     |
| Q5VWA5                                                                                                                 | R.TLVLLDNLNVR.E          | 1269.752 | 2 | 0.489 | 1.127     |

| Acc No                                                                                                               | Peptide               | MH+      | z | f     | H/L ratio |
|----------------------------------------------------------------------------------------------------------------------|-----------------------|----------|---|-------|-----------|
| <b><i>Dolichyl-diphosphooligosaccharide--protein glycosyltransferase 67 kDa subunit precursor (EC 2.4.1.119)</i></b> |                       |          |   |       |           |
| P04843                                                                                                               | R.DVPAYSQDTFK.V       | 1270.595 | 1 | 0.54  | 0.627     |
| P04843                                                                                                               | R.DVPAYSQDTFK.V       | 1270.595 | 2 | 0.794 | 0.441     |
| P04843                                                                                                               | K.GEDEEENNLEVR[E      | 1436.627 | 2 | 0.833 | 0.942     |
| P04843                                                                                                               | R.DISTLNSGK[K         | 938.492  | 1 | 0.767 | 0.2       |
| P04843                                                                                                               | K.LPVALDPGAK[I        | 984.586  | 1 | 0.952 | 0.331     |
| P04843                                                                                                               | R.DISTLNSGK[K         | 938.492  | 1 | 0.667 | 0.204     |
| P04843                                                                                                               | K.NIEIDSPYEISR.A      | 1435.706 | 1 | 0.631 | 0.907     |
| P04843                                                                                                               | K.NIEIDSPYEISR.A      | 1435.706 | 2 | 0.811 | 0.587     |
| P04843                                                                                                               | K.ALTSEIALLQSR.L      | 1301.742 | 1 | 0.673 | 0.931     |
| P04843                                                                                                               | R.DISTLNSGK.K         | 934.484  | 1 | 0.707 | 0.285     |
| P04843                                                                                                               | K.NIEIDSPYEISR.A      | 1435.706 | 2 | 0.713 | 0.351     |
| P04843                                                                                                               | R.DISTLNSGK.K         | 934.484  | 1 | 0.564 | 0.222     |
| P04843                                                                                                               | R.SEDLLDYGPF.R.D      | 1311.622 | 2 | 0.821 | 0.617     |
| P04843                                                                                                               | K.ALTSEIALLQSR.L      | 1301.742 | 2 | 0.917 | 0.407     |
| P04843                                                                                                               | K.GEDEEENNLEVR.E      | 1432.619 | 2 | 0.665 | 1.744     |
| P04843                                                                                                               | K.DTYIENEK.L          | 1011.463 | 1 | 0.627 | 0.228     |
| P04843                                                                                                               | R.ATSFLLALEPELEAR.L   | 1659.895 | 2 | 0.616 | 0.81      |
| P04843                                                                                                               | R.TVDLSSHAK.V         | 1070.584 | 2 | 0.904 | 0.38      |
| P04843                                                                                                               | K.VTAEVLAHLGGGSTR.A   | 1653.892 | 2 | 0.699 | 2.554     |
| P04843                                                                                                               | K.GEDEEENNLEVR.E      | 1432.619 | 1 | 0.567 | 2.184     |
| P04843                                                                                                               | K.LPVALDPGAK.I        | 980.578  | 1 | 0.994 | 0.347     |
| P04843                                                                                                               | K.DPAAEAR.M           | 729.353  | 2 | 0.756 | 1.331     |
| P04843                                                                                                               | K.DTYIENEK.L          | 1011.463 | 1 | 0.748 | 0.18      |
| <b><i>Dolichyl-P-Man:Man(5)GlcNAc(2)-PP-dolichyl mannosyltransferase (EC 2.4.1.-) (Dol-P-Man dependent)</i></b>      |                       |          |   |       |           |
| Q92685                                                                                                               | R.FLPEALFLHR.A        | 1242.699 | 2 | 0.812 | 0.68      |
| Q92685                                                                                                               | R.TGESILSLLR[D        | 1092.639 | 2 | 0.414 | 1.521     |
| <b><i>Down-regulated in metastasis protein (Key-1A6 protein) (Novel nucleolar protein 73) (NNP73)</i></b>            |                       |          |   |       |           |
| O75691                                                                                                               | K.VLYLLELYCEDKQSKIK.E | 2085.13  | 2 | 0.537 | 0.377     |
| <b><i>DTTR431 (C-type lectin superfamily 4, member G)</i></b>                                                        |                       |          |   |       |           |
| Q6UXB4                                                                                                               | K.QTAALGALK[E         | 876.528  | 1 | 0.666 | 48.218    |
| <b><i>Dynein intermediate chain 2, cytosolic (DH IC-2) (Cytoplasmic dynein intermediate chain 2)</i></b>             |                       |          |   |       |           |
| Q13409                                                                                                               | K.EGEIQAGAK[L         | 906.466  | 1 | 0.799 | 1.212     |
| <b><i>Elongation factor Tu, mitochondrial precursor (EF-Tu) (P43)</i></b>                                            |                       |          |   |       |           |
| P49411                                                                                                               | K.YEEIDNAPEER.A       | 1364.597 | 2 | 0.537 | 0.781     |

| Acc No                                                                                                                 | Peptide                    | MH+      | z | f     | H/L ratio |
|------------------------------------------------------------------------------------------------------------------------|----------------------------|----------|---|-------|-----------|
| <b><i>Epithelial protein lost in neoplasm</i></b>                                                                      |                            |          |   |       |           |
| Q9UHB6                                                                                                                 | K.SEISENTDASGK.I           | 1237.554 | 2 | 0.311 | 1.025     |
| <b><i>Erythrocyte band 7 integral membrane protein (Stomatin) (Protein 7.2b)</i></b>                                   |                            |          |   |       |           |
| P27105                                                                                                                 | R.VQNATLAVANITNADSATR.L    | 1929.999 | 2 | 0.687 | 0.647     |
| <b><i>Eukaryotic translation initiation factor 3 subunit 8 (eIF3 p110) (eIF3c)</i></b>                                 |                            |          |   |       |           |
| Q99613                                                                                                                 | R.GGVPLVK.E                | 669.429  | 1 | 0.488 | 7.83      |
| <b><i>Fatty acid-binding protein, epidermal (E-FABP) (Psoriasis-associated fatty acid-binding protein homolog)</i></b> |                            |          |   |       |           |
| Q01469                                                                                                                 | K.FEETTADGR.K              | 1029.461 | 2 | 0.764 | 2.447     |
| <b><i>Feline leukemia virus subgroup C receptor-related protein 1 (Feline leukemia virus subgroup C receptor)</i></b>  |                            |          |   |       |           |
| Q9Y5Y0                                                                                                                 | K.AIPADSPDQEPK.T           | 1372.672 | 2 | 0.813 | 0.352     |
| <b><i>FKSG30</i></b>                                                                                                   |                            |          |   |       |           |
| Q9BYX7                                                                                                                 | K.EITALAPSIMK.I            | 1177.663 | 2 | 0.998 | 181.065   |
| <b><i>FLJ00144 protein (Fragment)</i></b>                                                                              |                            |          |   |       |           |
| Q8TEP9                                                                                                                 | R.FFLSSGLIDK.V             | 1126.614 | 2 | 0.806 | 0.105     |
| <b><i>Flotillin-1</i></b>                                                                                              |                            |          |   |       |           |
| O75955                                                                                                                 | R.GEAEFAIGAR.A             | 1091.548 | 1 | 0.804 | 0.418     |
| <b><i>Flotillin-2 (Epidermal surface antigen) (ESA)</i></b>                                                            |                            |          |   |       |           |
| Q14254                                                                                                                 | K.IGEAEEAAVIEAMGK.A        | 1388.709 | 2 | 0.581 | 0.796     |
| Q14254                                                                                                                 | K.VDEIVVLSGDNSK.V          | 1374.711 | 2 | 0.555 | 2.847     |
| Q14254                                                                                                                 | K.VDEIVVLSGDNSK.V          | 1374.711 | 2 | 0.534 | 8.713     |
| <b><i>FP2653 (ELSD1897) (MGC3123 protein)</i></b>                                                                      |                            |          |   |       |           |
| Q71RG4                                                                                                                 | K.FLNDTEELAVARPEDTV GALK.S | 2292.185 | 2 | 0.531 | 0.748     |
| <b><i>FYVE, RhoGEF and PH domain containing protein 6 (Zinc finger FYVE domain containing protein 24)</i></b>          |                            |          |   |       |           |
| Q6ZV73                                                                                                                 | K.EFDKNIALLD EQCK.K        | 1669.823 | 2 | 0.584 | 1.949     |
| <b><i>Gap junction beta-6 protein (Connexin-30) (Cx30)</i></b>                                                         |                            |          |   |       |           |
| O95452                                                                                                                 | K.DIEDIK.K                 | 732.377  | 1 | 0.475 | 0.378     |
| <b><i>Gene rich cluster, C3f gene</i></b>                                                                              |                            |          |   |       |           |
| Q6P1A2                                                                                                                 | K.DQNSLSSEQQK.Y            | 1267.589 | 2 | 0.752 | 0.555     |
| <b><i>Glutamate--cysteine ligase catalytic subunit (EC 6.3.2.2) (Gamma-glutamylcysteine synthetase) (Gamma-</i></b>    |                            |          |   |       |           |
| P48506                                                                                                                 | R.EERGLEPLK.N              | 1070.584 | 2 | 0.74  | 0.786     |
| <b><i>Glyceraldehyde 3-phosphate dehydrogenase (GAPDH)</i></b>                                                         |                            |          |   |       |           |
| Q5JR58                                                                                                                 | K.LVITGNLITIFQER.D         | 1616.937 | 2 | 0.804 | 0.322     |
| <b><i>Glyceraldehyde-3-phosphate dehydrogenase, liver (EC 1.2.1.12) (GAPDH)</i></b>                                    |                            |          |   |       |           |

| Acc No                                                                                                              | Peptide               | MH+      | z | f     | H/L ratio |
|---------------------------------------------------------------------------------------------------------------------|-----------------------|----------|---|-------|-----------|
| P04406                                                                                                              | R.GALQNIIPASTGAAK[A   | 1415.798 | 2 | 0.779 | 2.726     |
| <b><i>Guanine nucleotide-binding protein G(I)/G(S)/G(O) gamma-12 subunit</i></b>                                    |                       |          |   |       |           |
| Q9UBI6                                                                                                              | K.TASTNNIAQAR.R       | 1146.586 | 1 | 0.638 | 0.169     |
| <b><i>Guanine nucleotide-binding protein G(k), alpha subunit (G(i) alpha-3)</i></b>                                 |                       |          |   |       |           |
| P08754                                                                                                              | R.ISQSNYIPTQQDVLK.T   | 1761.913 | 2 | 0.695 | 1.08      |
| <b><i>Guanine nucleotide-binding protein, alpha-14 subunit (G-protein alpha subunit 14)</i></b>                     |                       |          |   |       |           |
| O95837                                                                                                              | R.EYQLSDSAKYLLTDIDR.I | 2079.987 | 2 | 0.506 | 0.292     |
| <b><i>Heat shock cognate 71 kDa protein (Heat shock 70 kDa protein 8)</i></b>                                       |                       |          |   |       |           |
| P11142                                                                                                              | K.DAGTIAGLNVLK.I      | 1199.674 | 2 | 0.745 | 0.921     |
| P11142                                                                                                              | K.SFYPEEVSSMVLTK.M    | 1616.788 | 2 | 0.771 | 0.275     |
| <b><i>Heat-shock protein beta-1 (HspB1) (Heat shock 27 kDa protein) (HSP 27) (Stress-responsive protein 27)</i></b> |                       |          |   |       |           |
| P04792                                                                                                              | K.DGVVEITGK.H         | 917.494  | 1 | 0.701 | 1.225     |
| <b><i>Histone H4</i></b>                                                                                            |                       |          |   |       |           |
| P62805                                                                                                              | R.DNIQGITKPAIR[R      | 1329.762 | 2 | 0.548 | 0.781     |
| P62805                                                                                                              | R.DAVTYTEHAK.R        | 1134.543 | 2 | 0.405 | 1.283     |
| P62805                                                                                                              | R.ISGLIYEETR.G        | 1180.621 | 2 | 0.988 | 0.208     |
| P62805                                                                                                              | K.VFLENVIR.D          | 989.578  | 1 | 0.665 | 0.622     |
| P62805                                                                                                              | K.VFLENVIR.D          | 989.578  | 1 | 0.533 | 0.656     |
| P62805                                                                                                              | K.VFLENVIR.D          | 989.578  | 2 | 0.837 | 1.305     |
| P62805                                                                                                              | R.DNIQGITKPAIR.R      | 1325.754 | 2 | 0.449 | 1.067     |
| P62805                                                                                                              | K.VFLENVIR.D          | 989.578  | 2 | 0.777 | 1.15      |
| P62805                                                                                                              | R.DNIQGITK[P          | 892.487  | 1 | 0.465 | 0.476     |
| P62805                                                                                                              | R.ISGLIYEETR.G        | 1180.621 | 1 | 0.44  | 0.902     |
| P62805                                                                                                              | R.ISGLIYEETR.G        | 1180.621 | 1 | 0.411 | 1.145     |
| <b><i>HIV GAG protein</i></b>                                                                                       |                       |          |   |       |           |
| GAG_Protein                                                                                                         | R.FGEETTTSPQK.Q       | 1224.574 | 2 | 0.727 | 7.502     |
| GAG_Protein                                                                                                         | R.FGEETTTSPQK[.Q      | 1228.582 | 1 | 0.75  | 27.479    |
| GAG_Protein                                                                                                         | K.ETINEEAAEWDR[L      | 1466.652 | 2 | 0.336 | 13.455    |
| GAG_Protein                                                                                                         | R.WIILGLNK[I          | 960.601  | 1 | 0.589 | 8.763     |
| GAG_Protein                                                                                                         | K.ELYPLASLR[S         | 1065.607 | 1 | 0.474 | 6.959     |
| GAG_Protein                                                                                                         | K.ELYPLASLR[S         | 1065.607 | 1 | 0.419 | 5.428     |
| GAG_Protein                                                                                                         | R.FGEETTTSPQK[.Q      | 1228.582 | 1 | 0.756 | 18.584    |
| GAG_Protein                                                                                                         | R.FGEETTTSPQK[.Q      | 1228.582 | 1 | 0.773 | 20.547    |
| GAG_Protein                                                                                                         | R.FGEETTTSPQK[.Q      | 1228.582 | 2 | 0.735 | 8.78      |
| GAG_Protein                                                                                                         | R.FGEETTTSPQK[.Q      | 1228.582 | 2 | 0.728 | 8.376     |

| <b>Acc No</b>                                                                                                     | <b>Peptide</b>          | <b>MH+</b> | <b>z</b> | <b>f</b> | <b>H/L ratio</b> |
|-------------------------------------------------------------------------------------------------------------------|-------------------------|------------|----------|----------|------------------|
| GAG_Protein                                                                                                       | R.QILGQLQPSLQTGSEELR.S  | 1997.066   | 2        | 0.309    | 4.06             |
| <b><i>HLAT1-3TM</i></b>                                                                                           |                         |            |          |          |                  |
| Q8MH63                                                                                                            | K.RADGAAPAGEGEGVTLQR.N  | 1754.878   | 2        | 0.993    | 0.795            |
| <b><i>Hormonally up-regulated neu tumor-associated kinase (EC 2.7.1.37) (Serine/threonine-protein kinase)</i></b> |                         |            |          |          |                  |
| P57058                                                                                                            | K.LGYKNSDVINTVLSNR[A    | 1796.963   | 2        | 0.427    | 1.266            |
| <b><i>HSPC121</i></b>                                                                                             |                         |            |          |          |                  |
| Q9P035                                                                                                            | R.QVNITVQK.K            | 929.542    | 1        | 0.864    | 0.488            |
| Q9P035                                                                                                            | R.LESEGSPETLTNLR.K      | 1545.776   | 2        | 0.32     | 0.93             |
| Q9P035                                                                                                            | R.QVNITVQK[K            | 933.549    | 1        | 0.759    | 0.475            |
| <b><i>Hypothetical protein</i></b>                                                                                |                         |            |          |          |                  |
| Q6PQ33                                                                                                            | R.REISNVSREAR.A         | 1316.703   | 2        | 0.946    | 1.18             |
| Q4G0N0                                                                                                            | R.EVDDSSAQK.G           | 978.437    | 1        | 0.344    | 1.443            |
| <b><i>Hypothetical protein (Novel protein)</i></b>                                                                |                         |            |          |          |                  |
| Q8Nfq8                                                                                                            | R.LLAPEAGSHPQQTQK.L     | 1604.839   | 2        | 0.654    | 0.894            |
| <b><i>Hypothetical protein C14orf39</i></b>                                                                       |                         |            |          |          |                  |
| Q8N1H7                                                                                                            | K.MNETIFMKFR[V          | 1320.657   | 2        | 0.681    | 1.165            |
| <b><i>Hypothetical protein DKFZp313B047</i></b>                                                                   |                         |            |          |          |                  |
| Q5H9S5                                                                                                            | K.EDVDAAVK.Q            | 846.42     | 1        | 0.922    | 0.202            |
| <b><i>Hypothetical protein FLJ10846</i></b>                                                                       |                         |            |          |          |                  |
| Q9NVA4                                                                                                            | R.DDISEQVR.H            | 961.458    | 1        | 0.564    | 0.473            |
| <b><i>Hypothetical protein FLJ14938 (Hypothetical protein NT2RP2003902) (GK001 protein)</i></b>                   |                         |            |          |          |                  |
| Q96A33                                                                                                            | K.RQDLLNVLAR.M          | 1197.706   | 2        | 0.74     | 0.557            |
| <b><i>Hypothetical protein FLJ16464</i></b>                                                                       |                         |            |          |          |                  |
| Q6ZN37                                                                                                            | R.QLNEVENNIKK.K         | 1328.717   | 1        | 0.534    | 0.287            |
| <b><i>Hypothetical protein FLJ20422 (AVLG582)</i></b>                                                             |                         |            |          |          |                  |
| Q9NX61                                                                                                            | R.DFLHQPPFGETR.F        | 1443.702   | 2        | 0.673    | 1.635            |
| <b><i>Hypothetical protein FLJ20455 (TPA018) (Ovarian carcinoma immunoreactive antigen) (OCIA domain)</i></b>     |                         |            |          |          |                  |
| Q9NX40                                                                                                            | K.LENSPLGEALR.S         | 1198.643   | 2        | 0.998    | 0.293            |
| <b><i>Hypothetical protein FLJ39430</i></b>                                                                       |                         |            |          |          |                  |
| Q8N8I4                                                                                                            | K.HLREEEEEGEK[H         | 1388.642   | 2        | 0.68     | 0.321            |
| <b><i>Hypothetical protein FLJ46844</i></b>                                                                       |                         |            |          |          |                  |
| Q6ZQW6                                                                                                            | R.MQGPSLPCLTGTPTLWPHR.C | 2149.068   | 2        | 0.573    | 1.135            |
| <b><i>Hypothetical protein FP14381</i></b>                                                                        |                         |            |          |          |                  |

| Acc No                                                                                                                       | Peptide                  | MH+      | z | f     | H/L ratio |
|------------------------------------------------------------------------------------------------------------------------------|--------------------------|----------|---|-------|-----------|
| Q71M32                                                                                                                       | R.PLPHCFCHKVNALVR[G      | 1737.917 | 2 | 0.654 | 0.453     |
| <b><i>Hypothetical protein KIAA1426</i></b>                                                                                  |                          |          |   |       |           |
| Q96RY5                                                                                                                       | R.PTCVQAVEGMSRMIVELHR.K  | 2156.077 | 2 | 0.698 | 0.373     |
| <b><i>Hypothetical protein LOC133957 (Hypothetical protein FLJ25701)</i></b>                                                 |                          |          |   |       |           |
| Q96BQ5                                                                                                                       | R.TAAFQQDLEAK.Y          | 1221.611 | 2 | 0.736 | 0.506     |
| <b><i>Hypothetical protein MGC2731</i></b>                                                                                   |                          |          |   |       |           |
| Q9BQ15                                                                                                                       | K.NLNLIFIVLETGR.V        | 1501.874 | 2 | 0.621 | 0.595     |
| Q9BQ15                                                                                                                       | K.NLNLIFIVLETGR.V        | 1501.874 | 2 | 0.831 | 0.32      |
| Q9BQ15                                                                                                                       | K.NLNLIFIVLETGR.V        | 1501.874 | 2 | 0.709 | 0.621     |
| <b><i>Hypothetical protein PRO1855</i></b>                                                                                   |                          |          |   |       |           |
| Q96AG4                                                                                                                       | K.DNPLDPVLAK.V           | 1081.589 | 2 | 0.854 | 0.649     |
| <b><i>IGHG4 protein</i></b>                                                                                                  |                          |          |   |       |           |
| Q8TC63                                                                                                                       | R.WVLSRLQLQESGPGLLK.P    | 1924.101 | 2 | 0.563 | 1.219     |
| <b><i>Inner membrane protein OXA1L, mitochondrial precursor (Oxidase assembly 1-like protein) (OXA1-like)</i></b>            |                          |          |   |       |           |
| Q15070                                                                                                                       | K.DNPPNIPSSSSKPK.S       | 1467.744 | 2 | 0.584 | 0.987     |
| <b><i>Inositol 1,4,5-trisphosphate receptor type 2 (Type 2 inositol 1,4,5-trisphosphate receptor) (Type 2 InsP3)</i></b>     |                          |          |   |       |           |
| Q14571                                                                                                                       | K.GGEEPIEESNILSPVQDGTK.K | 2099.014 | 2 | 0.683 | 1.013     |
| <b><i>Intraflagellar transport 81 (Carnitine deficiency-associated protein expressed in ventricle 1) (CDV-1 protein)</i></b> |                          |          |   |       |           |
| Q8WYA0                                                                                                                       | K.KEAKAEELQEAK.E         | 1373.727 | 2 | 0.321 | 5.761     |
| <b><i>Ka35 protein</i></b>                                                                                                   |                          |          |   |       |           |
| Q6A163                                                                                                                       | K.ADLEAQVQSLK.E          | 1201.642 | 2 | 0.591 | 1.109     |
| <b><i>Keratin, type I cytoskeletal 18 (Cytokeratin-18) (CK-18) (Keratin-18) (K18)</i></b>                                    |                          |          |   |       |           |
| P05783                                                                                                                       | R.AQYDELAR.K             | 965.469  | 1 | 0.85  | 0.506     |
| P05783                                                                                                                       | R.SLGSVQAPSYGAR[P        | 1296.667 | 2 | 0.883 | 0.262     |
| P05783                                                                                                                       | R.AQIFANTVDNAR.I         | 1319.67  | 2 | 0.737 | 1.245     |
| P05783                                                                                                                       | R.AQIFANTVDNAR.I         | 1319.67  | 1 | 0.611 | 0.567     |
| P05783                                                                                                                       | K.VIDDTNITR.L            | 1046.548 | 1 | 0.693 | 1.206     |
| P05783                                                                                                                       | K.VIDDTNITR.L            | 1046.548 | 2 | 0.981 | 0.548     |
| P05783                                                                                                                       | R.TVQSLEIDLDSMR.N        | 1506.747 | 2 | 0.897 | 0.275     |
| P05783                                                                                                                       | R.AQIFANTVDNAR.I         | 1319.67  | 2 | 0.559 | 0.346     |
| P05783                                                                                                                       | R.SLGSVQAPSYGAR.P        | 1292.659 | 2 | 0.787 | 0.454     |
| P05783                                                                                                                       | R.QAQEYEALLNIK.V         | 1419.748 | 2 | 0.691 | 0.313     |
| <b><i>Keratin, type I cytoskeletal 9 (Cytokeratin-9) (CK-9) (Keratin-9) (K9)</i></b>                                         |                          |          |   |       |           |
| P35527                                                                                                                       | R.FSSSSGYGGSSR[V         | 1239.537 | 2 | 0.741 | 8.506     |

| Acc No | Peptide                          | MH+      | z | f     | H/L ratio |
|--------|----------------------------------|----------|---|-------|-----------|
| P35527 | K.VQALEEANNDLENK.I               | 1586.766 | 2 | 0.443 | 1.187     |
| P35527 | K.TLLDIDNTR[M                    | 1064.571 | 2 | 0.738 | 3.961     |
| P35527 | K.TLLDIDNTR[M                    | 1064.571 | 2 | 0.752 | 3.539     |
| P35527 | R.SGGGGGGGLGSGGSIR.S             | 1232.598 | 1 | 0.721 | 2.574     |
| P35527 | R.FSSSSGYGGSSR.V                 | 1235.529 | 1 | 0.614 | 1.682     |
| P35527 | K.TLLDIDNTR.M                    | 1060.563 | 1 | 0.672 | 1.013     |
| P35527 | K.TLLDIDNTR.M                    | 1060.563 | 1 | 0.614 | 1.106     |
| P35527 | K.DQIVDLTVGNK.T                  | 1315.685 | 2 | 0.629 | 0.5       |
| P35527 | K.STMQELNSR.L                    | 1065.499 | 1 | 0.687 | 2.288     |
| P35527 | K.DIENQYETQITQIEHEVSSSQEVQSSAK[E | 3268.522 | 3 | 0.831 | 2.946     |
| P35527 | R.FSSSSGYGGSSR[V                 | 1239.537 | 2 | 0.719 | 8.239     |
| P35527 | R.FSSSSGYGGSSR.V                 | 1235.529 | 1 | 0.588 | 1.735     |
| P35527 | K.STMQELNSR.L                    | 1065.499 | 2 | 0.788 | 1.571     |
| P35527 | K.NYSPYYNTIDDLK.D                | 1605.743 | 2 | 0.46  | 0.531     |
| P35527 | R.QEYEQLIAK[N                    | 1125.592 | 1 | 0.697 | 1.818     |
| P35527 | R.SGGGGGGGLGSGGSIR.S             | 1232.598 | 2 | 0.799 | 3.669     |
| P35527 | K.STMQELNSR[L                    | 1069.507 | 1 | 0.601 | 4.408     |
| P35527 | R.QGVDADINGLR.Q                  | 1157.591 | 2 | 0.47  | 0.971     |

***Keratin, type II cytoskeletal 1 (Cytokeratin-1) (CK-1) (Keratin-1) (K1) (67 kDa cytoke-***  
***ratin) (Hair alpha***

|        |                          |          |   |       |       |
|--------|--------------------------|----------|---|-------|-------|
| P04264 | R.DYQELMNTK[L            | 1145.527 | 1 | 0.719 | 1.395 |
| P04264 | R.SLDLDSIAEVK.A          | 1302.715 | 1 | 0.649 | 2.823 |
| P04264 | R.TLLEGEESR.M            | 1033.516 | 1 | 0.828 | 1.188 |
| P04264 | K.AEAESLYQSK[Y           | 1129.55  | 1 | 0.874 | 1.221 |
| P04264 | R.GSGGGSSGSIGGR[G        | 1096.511 | 1 | 0.618 | 2.529 |
| P04264 | K.DVDGAYMTK.V            | 999.445  | 2 | 0.639 | 2.438 |
| P04264 | K.YEELQITAGR[H           | 1183.608 | 1 | 0.597 | 1.698 |
| P04264 | R.TLLEGEESR.M            | 1033.516 | 2 | 0.794 | 2.398 |
| P04264 | R.GSGGGSSGSIGGR.G        | 1092.503 | 2 | 0.663 | 3.152 |
| P04264 | R.FSSC*GGGGGSGAGGGFGSR[S | 1769.743 | 2 | 0.802 | 1.716 |
| P04264 | K.SLNNQFASFIDK.V         | 1383.69  | 2 | 0.375 | 0.634 |
| P04264 | K.YEELQITAGR.H           | 1179.6   | 2 | 0.574 | 2.218 |
| P04264 | K.SLNNQFASFIDK.V         | 1383.69  | 2 | 0.394 | 1.177 |
| P04264 | R.SGGGFSSGSAGIINYQR.R    | 1657.793 | 2 | 0.344 | 2.024 |
| P04264 | R.SEIDNVKK[Q             | 936.513  | 2 | 0.852 | 3.68  |
| P04264 | R.TNAENEFVTIK.K          | 1265.637 | 1 | 0.564 | 2.245 |
| P04264 | R.SLDLDSIAEVK.A          | 1302.715 | 2 | 0.629 | 0.95  |

| Acc No                                                                                                     | Peptide             | MH+      | z | f     | H/L ratio |
|------------------------------------------------------------------------------------------------------------|---------------------|----------|---|-------|-----------|
| P04264                                                                                                     | K.WELLQQVDTSTR[T    | 1479.757 | 1 | 0.68  | 4.62      |
| P04264                                                                                                     | R.GSGGGSSGGSIGGR.G  | 1092.503 | 1 | 0.639 | 2.448     |
| P04264                                                                                                     | K.WELLQQVDTSTR.T    | 1475.749 | 2 | 0.721 | 2.285     |
| P04264                                                                                                     | K.LNDLEDALQQAK[E    | 1361.704 | 1 | 0.832 | 1.631     |
| P04264                                                                                                     | K.LNDLEDALQQAK[E    | 1361.704 | 2 | 0.705 | 2.318     |
| P04264                                                                                                     | R.TLLEGEESR[M       | 1037.524 | 2 | 0.786 | 2.065     |
| P04264                                                                                                     | R.DYQELMNTK.L       | 1141.519 | 2 | 0.659 | 4.344     |
| P04264                                                                                                     | K.AEAESLYQSK[Y      | 1129.55  | 1 | 0.811 | 1.379     |
| P04264                                                                                                     | K.WELLQQVDTSTR[T    | 1479.757 | 2 | 0.83  | 1.822     |
| P04264                                                                                                     | R.SLDLDSIIAEVK[A    | 1306.723 | 1 | 0.648 | 2.736     |
| P04264                                                                                                     | R.TLLEGEESR[M       | 1037.524 | 1 | 0.788 | 1.139     |
| P04264                                                                                                     | R.TNAENEFVTIK[K     | 1269.645 | 1 | 0.554 | 2.53      |
| P04264                                                                                                     | K.LNDLEDALQQAK[E    | 1361.704 | 1 | 0.743 | 1.444     |
| P04264                                                                                                     | R.GSGGGSSGGSIGGR.G  | 1092.503 | 2 | 0.645 | 3.079     |
| P04264                                                                                                     | K.LNDLEDALQQAK[E    | 1361.704 | 2 | 0.711 | 2.124     |
| P04264                                                                                                     | R.TNAENEFVTIK.K     | 1265.637 | 1 | 0.551 | 2.197     |
| P04264                                                                                                     | R.TNAENEFVTIK.K     | 1265.637 | 2 | 0.6   | 2.648     |
| P04264                                                                                                     | K.SLNNQFASFIDK[V    | 1387.698 | 1 | 0.405 | 1.463     |
| P04264                                                                                                     | K.LNDLEDALQQAK[E    | 1361.704 | 2 | 0.693 | 2.608     |
| P04264                                                                                                     | R.TLLEGEESR.M       | 1033.516 | 2 | 0.752 | 2.164     |
| P04264                                                                                                     | R.TLLEGEESR[M       | 1037.524 | 1 | 0.815 | 0.879     |
| P04264                                                                                                     | K.QISNLQQSISDAEQR[G | 1720.859 | 2 | 0.992 | 1.157     |
| P04264                                                                                                     | R.SLDLDSIIAEVK.A    | 1302.715 | 2 | 0.614 | 0.812     |
| P04264                                                                                                     | R.DYQELMNTK[L       | 1145.527 | 1 | 0.702 | 1.309     |
| <b><i>Keratin, type II cytoskeletal 1b</i></b>                                                             |                     |          |   |       |           |
| Q7Z794                                                                                                     | K.MEIAELNR[T        | 979.501  | 1 | 0.342 | 0.94      |
| <b><i>Keratin, type II cytoskeletal 5 (Cytokeratin-5) (CK-5) (Keratin-5) (K5) (58 kDa cytokeratin)</i></b> |                     |          |   |       |           |
| P13647                                                                                                     | K.LAELEEALQK.A      | 1143.626 | 2 | 0.585 | 1.521     |
| P13647                                                                                                     | K.YEELQQTAGR[H      | 1198.583 | 1 | 0.781 | 2.501     |
| P13647                                                                                                     | K.LAELEEALQK[A      | 1147.634 | 1 | 0.762 | 1.492     |
| <b><i>Keratin, type II cytoskeletal 7 (Cytokeratin-7) (CK-7) (Keratin-7) (K7) (Sarcolectin)</i></b>        |                     |          |   |       |           |
| P08729                                                                                                     | K.LEAAIAEAER.G      | 1201.606 | 2 | 0.704 | 0.618     |
| P08729                                                                                                     | R.LDADPSLQR.V       | 1014.521 | 2 | 0.627 | 1.228     |
| <b><i>Keratin, type II cytoskeletal 8 (Cytokeratin-8) (CK-8) (Keratin-8) (K8)</i></b>                      |                     |          |   |       |           |
| P05787                                                                                                     | R.LQAEIEGLK.G       | 1000.567 | 1 | 0.551 | 0.218     |



| Acc No                                                                                                                  | Peptide                  | MH+      | z | f     | H/L ratio |
|-------------------------------------------------------------------------------------------------------------------------|--------------------------|----------|---|-------|-----------|
| <b><i>Keratinocyte associated protein 2</i></b>                                                                         |                          |          |   |       |           |
| Q6PG45                                                                                                                  | K.ISSTLYQAAAPVLTPAK.V    | 1730.969 | 2 | 0.833 | 0.785     |
| <b><i>Lanosterol synthase (EC 5.4.99.7) (Oxidosqualene--lanosterol cyclase) (2,3-epoxysqualene--lanosterol</i></b>      |                          |          |   |       |           |
| P48449                                                                                                                  | R.DGTAC*AEVSRACDFLLSR.Q  | 1970.906 | 2 | 0.881 | 0.636     |
| <b><i>Large neutral amino acids transporter small subunit 1 (L-type amino acid transporter 1) (4F2 light chain)</i></b> |                          |          |   |       |           |
| Q01650                                                                                                                  | K.GDVSNLDPNFSFEGTK.L     | 1726.792 | 1 | 0.707 | 0.283     |
| <b><i>Leucine zipper-EF-hand containing transmembrane protein 1, mitochondrial precursor</i></b>                        |                          |          |   |       |           |
| O95202                                                                                                                  | K.VAEVEGEQVDNK.A         | 1316.633 | 2 | 0.467 | 0.483     |
| <b><i>Lysosome membrane protein II (LIMP II) (Scavenger receptor class B member 2) (85 kDa lysosomal</i></b>            |                          |          |   |       |           |
| Q14108                                                                                                                  | R.DQSVGDPK.I             | 845.4    | 1 | 0.95  | 0.205     |
| <b><i>Mcd4p homolog</i></b>                                                                                             |                          |          |   |       |           |
| O95427                                                                                                                  | K.GWKENPVEFDSLFSNESK.Y   | 2025.955 | 2 | 0.484 | 0.59      |
| <b><i>Membrane associated progesterone receptor component 1 (mPR)</i></b>                                               |                          |          |   |       |           |
| O00264                                                                                                                  | K.EGEEPTVYSDEEEK.D       | 1737.734 | 2 | 0.802 | 0.204     |
| O00264                                                                                                                  | R.GDQPAASGSDDDDEPPPLPR.L | 2035.884 | 2 | 0.816 | 0.602     |
| <b><i>Membrane associated progesterone receptor component 2 (Progesterone membrane binding protein) (Steroid</i></b>    |                          |          |   |       |           |
| O15173                                                                                                                  | R.DFSLEQLR.Q             | 1007.516 | 2 | 0.753 | 0.45      |
| O15173                                                                                                                  | R.DFSLEQLR.Q             | 1007.516 | 1 | 0.542 | 0.691     |
| O15173                                                                                                                  | R.GLGAGAGAGEESPATSLPR.M  | 1697.845 | 2 | 0.729 | 1.333     |
| <b><i>Membrane protein (STMF151) (LOC54499) (Xenogeneic cross-immune protein)</i></b>                                   |                          |          |   |       |           |
| Q9UM00                                                                                                                  | K.ETITESAGR.Q            | 963.474  | 1 | 0.865 | 0.39      |
| Q9UM00                                                                                                                  | K.QAGGFLGPPPPSGK.F       | 1309.69  | 2 | 0.668 | 0.761     |
| <b><i>MGC13159 protein</i></b>                                                                                          |                          |          |   |       |           |
| Q5BJH2                                                                                                                  | R.EGDAGPETSTAVEK.K       | 1390.633 | 2 | 0.487 | 0.89      |
| <b><i>Microsomal glutathione S-transferase 1 (EC 2.5.1.18) (Microsomal GST-1) (Microsomal GST-I)</i></b>                |                          |          |   |       |           |
| P10620                                                                                                                  | K.VFANPEDC*VAFGK.G       | 1453.678 | 2 | 0.719 | 1.127     |
| P10620                                                                                                                  | K.VFANPEDC*VAFGK.G       | 1453.678 | 2 | 0.751 | 0.837     |
| <b><i>Minor histocompatibility antigen H13 (EC 3.4.99.-) (Signal peptide peptidase) (Presenilin-like protein 3)</i></b> |                          |          |   |       |           |
| Q8TCT9                                                                                                                  | R.QYQLLFTQGSGENK.E       | 1612.797 | 2 | 0.512 | 0.531     |
| Q8TCT9                                                                                                                  | K.DPAAVTESK[E            | 921.466  | 1 | 0.614 | 0.454     |
| <b><i>Mitochondrial 2-oxoglutarate/malate carrier protein (OGCP) (Solute carrier family 25 member 11)</i></b>           |                          |          |   |       |           |
| Q02978                                                                                                                  | K.NVFNALIR.I             | 946.547  | 2 | 0.713 | 0.287     |
| <b><i>Mitochondrial aspartate-glutamate carrier protein</i></b>                                                         |                          |          |   |       |           |

| <b>Acc No</b>                                                                                                   | <b>Peptide</b>          | <b>MH+</b> | <b>z</b> | <b>f</b> | <b>H/L ratio</b> |
|-----------------------------------------------------------------------------------------------------------------|-------------------------|------------|----------|----------|------------------|
| Q546F9                                                                                                          | K.TVELLSGVVDQTK.D       | 1388.763   | 2        | 0.363    | 0.643            |
| Q546F9                                                                                                          | R.YLNIFGESQPNPK.T       | 1506.759   | 2        | 0.809    | 0.524            |
| <b><i>Mitochondrial carrier homolog 2 (Met-induced mitochondrial protein)</i></b>                               |                         |            |          |          |                  |
| Q9Y6C9                                                                                                          | R.GLFTGLTPR.L           | 961.547    | 2        | 0.557    | 0.215            |
| Q9Y6C9                                                                                                          | K.VLIQVGYEPLPPTIGR.N    | 1752.005   | 2        | 0.851    | 0.413            |
| Q9Y6C9                                                                                                          | K.GEELGPGNVQK.E         | 1127.569   | 2        | 0.857    | 0.287            |
| Q9Y6C9                                                                                                          | R.GLFTGLTPR.L           | 961.547    | 1        | 0.496    | 0.291            |
| Q9Y6C9                                                                                                          | K.EVSSSFHDHVIK.E        | 1247.627   | 2        | 0.356    | 0.345            |
| Q9Y6C9                                                                                                          | R.GLFTGLTPR.L           | 961.547    | 1        | 0.863    | 0.161            |
| <b><i>Mitochondrial dicarboxylate carrier</i></b>                                                               |                         |            |          |          |                  |
| Q9UBX3                                                                                                          | K.VHLQTQQEVK.L          | 1209.659   | 2        | 0.612    | 0.53             |
| <b><i>Mitochondrial import inner membrane translocase subunit Tim17-B</i></b>                                   |                         |            |          |          |                  |
| O60830                                                                                                          | R.YTAQQFR.N             | 913.453    | 1        | 0.39     | 1.14             |
| <b><i>Mitochondrial import receptor subunit TOM20 homolog (Mitochondrial 20 kDa outer membrane protein)</i></b> |                         |            |          |          |                  |
| Q15388                                                                                                          | K.DAEAVQK.F             | 760.384    | 1        | 0.486    | 0.524            |
| <b><i>Mitochondrial inner membrane protein (Mitofilin) (p87/89) (Proliferation-inducing gene 4 protein)</i></b> |                         |            |          |          |                  |
| Q16891                                                                                                          | K.TSSAETPTIPLGSAVEAIK[A | 1876.004   | 2        | 0.426    | 0.639            |
| Q16891                                                                                                          | K.LSEQELQFR.R           | 1149.59    | 2        | 0.652    | 1.255            |
| Q16891                                                                                                          | K.EVAGAKPHITAAEGK.L     | 1478.796   | 2        | 0.795    | 0.299            |
| Q16891                                                                                                          | K.TSSAETPTIPLGSAVEAIK.A | 1871.996   | 2        | 0.5      | 0.653            |
| Q16891                                                                                                          | K.LSEQELQFR.R           | 1149.59    | 1        | 0.552    | 1.293            |
| Q16891                                                                                                          | K.TSSAETPTIPLGSAVEAIK.A | 1871.996   | 2        | 0.47     | 0.524            |
| Q16891                                                                                                          | K.PHITAAEGK.L           | 923.495    | 1        | 0.622    | 0.537            |
| Q16891                                                                                                          | K.SEFEQNLSEK.L          | 1210.559   | 2        | 0.517    | 0.862            |
| Q16891                                                                                                          | K.VQAAQSEAK.V           | 931.484    | 1        | 0.574    | 0.737            |
| Q16891                                                                                                          | K.TSSAETPTIPLGSAVEAIK.A | 1871.996   | 2        | 0.361    | 1.15             |
| Q16891                                                                                                          | R.SEIQAEQDR.K           | 1075.501   | 2        | 0.464    | 0.852            |
| Q16891                                                                                                          | K.LSEQELQFR[R.R         | 1153.598   | 2        | 0.623    | 2.215            |
| Q16891                                                                                                          | R.SEIQAEQDR.K           | 1075.501   | 2        | 0.384    | 0.715            |
| Q16891                                                                                                          | K.EVAGAKPHITAAEGK[L     | 1482.804   | 2        | 0.824    | 0.378            |
| Q16891                                                                                                          | K.AAMDNSEIAGEK.K        | 1235.557   | 2        | 0.606    | 0.772            |
| <b><i>Mitsugumin-23 precursor (Mg23)</i></b>                                                                    |                         |            |          |          |                  |
| Q9BVC6                                                                                                          | R.EAPVDVLTQIGR.S        | 1297.711   | 2        | 0.658    | 0.71             |
| <b><i>Monocarboxylate transporter 1 (MCT 1)</i></b>                                                             |                         |            |          |          |                  |
| P53985                                                                                                          | K.EEETSIDVAGKPNEVTK[A   | 1849.916   | 2        | 0.879    | 0.747            |

| Acc No                                                                                                      | Peptide               | MH+      | z | f     | H/L ratio |
|-------------------------------------------------------------------------------------------------------------|-----------------------|----------|---|-------|-----------|
| P53985                                                                                                      | K.EEETSIDVAGKPNEVTK[A | 1849.916 | 2 | 0.826 | 0.882     |
| P53985                                                                                                      | K.EEETSIDVAGKPNEVTK.A | 1845.908 | 2 | 0.856 | 0.869     |
| <b><i>Monocarboxylate transporter 4 (MCT 4) (MCT 3)</i></b>                                                 |                       |          |   |       |           |
| O15427                                                                                                      | K.EPQPEVAAAEEEEK.L    | 1426.67  | 1 | 0.494 | 0.716     |
| O15427                                                                                                      | K.DLGVPDTK.A          | 844.441  | 1 | 0.347 | 0.558     |
| O15427                                                                                                      | K.EPQPEVAAAEEEEK.L    | 1426.67  | 2 | 0.436 | 0.494     |
| O15427                                                                                                      | R.LLDLSVFR.D          | 962.567  | 1 | 1     | 0.171     |
| O15427                                                                                                      | K.EPQPEVAAAEEEEK.L    | 1426.67  | 2 | 0.482 | 0.434     |
| O15427                                                                                                      | R.LLDLSVFR.D          | 962.567  | 2 | 0.952 | 0.217     |
| O15427                                                                                                      | R.LLDLSVFR.D          | 962.567  | 1 | 0.888 | 0.253     |
| <b><i>mRNA decapping enzyme 1B (EC 3.-.-.-)</i></b>                                                         |                       |          |   |       |           |
| Q8IZD4                                                                                                      | K.FPVLAQSSGTGK.P      | 1191.637 | 2 | 0.751 | 0.312     |
| <b><i>Myb-related protein B (B-Myb)</i></b>                                                                 |                       |          |   |       |           |
| P10244                                                                                                      | R.SEAGIELIIEDDIRPEK.Q | 1927.002 | 2 | 0.429 | 0.403     |
| <b><i>Myosin Ib (Myosin I alpha) (MMI-alpha) (MMIa) (MYH-1c)</i></b>                                        |                       |          |   |       |           |
| O43795                                                                                                      | K.EIC*ELTGIDQSVLER[A  | 1765.877 | 2 | 0.769 | 0.933     |
| O43795                                                                                                      | R.DQFTDQQK.L          | 1009.458 | 2 | 0.565 | 0.784     |
| O43795                                                                                                      | K.LEASELFK.D          | 936.504  | 1 | 0.509 | 23.594    |
| <b><i>Myosin IE</i></b>                                                                                     |                       |          |   |       |           |
| Q4KMR3                                                                                                      | K.QGLFPNNYVTK.I       | 1280.663 | 2 | 0.871 | 0.582     |
| <b><i>Myosin-10 (Myosin heavy chain, nonmuscle IIb) (Nonmuscle myosin heavy chain IIb) (NMMHC II-b)</i></b> |                       |          |   |       |           |
| P35580                                                                                                      | R.LQQELDDLTVDLDHQR.Q  | 1937.956 | 2 | 0.967 | 1.13      |
| P35580                                                                                                      | K.TELEDTLDTTAAQQELR.T | 1933.935 | 2 | 0.386 | 1.147     |
| <b><i>Myosin-9 (Myosin heavy chain, nonmuscle IIa) (Nonmuscle myosin heavy chain IIa) (NMMHC II-a)</i></b>  |                       |          |   |       |           |
| P35579                                                                                                      | K.TELEDTLDTTAAQQELR.S | 1919.919 | 2 | 0.46  | 1.779     |
| P35579                                                                                                      | K.KVEAQLQELQVK.F      | 1412.811 | 2 | 0.524 | 1.011     |
| P35579                                                                                                      | R.EQEVNLIK.K          | 972.536  | 1 | 0.899 | 0.42      |
| P35579                                                                                                      | R.EQLEEEEEAK.H        | 1233.548 | 2 | 0.994 | 0.259     |
| P35579                                                                                                      | K.DLEGLSQR[H          | 921.477  | 1 | 0.692 | 0.566     |
| P35579                                                                                                      | R.VEEAAAQK.N          | 903.442  | 1 | 0.612 | 0.622     |
| P35579                                                                                                      | R.VEEAAAQK.N          | 903.442  | 2 | 0.555 | 0.606     |
| <b><i>Myotubularin (EC 3.1.3.48)</i></b>                                                                    |                       |          |   |       |           |
| Q13496                                                                                                      | R.VATFRSRNR.I         | 1106.618 | 2 | 0.94  | 0.606     |
| <b><i>N-acetylgalactosaminyltransferase</i></b>                                                             |                       |          |   |       |           |

| <b>Acc No</b>                                                                                                       | <b>Peptide</b>              | <b>MH+</b> | <b>z</b> | <b>f</b> | <b>H/L ratio</b> |
|---------------------------------------------------------------------------------------------------------------------|-----------------------------|------------|----------|----------|------------------|
| Q76KP1                                                                                                              | R.GSDHVEVGWRAFLPGLK.F       | 1867.981   | 2        | 0.751    | 0.228            |
| <b><i>NAD(P) transhydrogenase, mitochondrial precursor (EC 1.6.1.2) (Pyridine nucleotide transhydrogenase)</i></b>  |                             |            |          |          |                  |
| Q13423                                                                                                              | K.AVVLAANHFGR.F             | 1154.643   | 2        | 0.6      | 0.408            |
| <b><i>NAD-dependent deacetylase sirtuin-5 (EC 3.5.1.-) (SIR2-like protein 5)</i></b>                                |                             |            |          |          |                  |
| Q9NXA8                                                                                                              | R.RVVVITQNIDELHRK[A         | 1824.058   | 2        | 0.881    | 1.065            |
| <b><i>NADH-ubiquinone oxidoreductase 75 kDa subunit, mitochondrial precursor (EC 1.6.5.3) (EC 1.6.99.3)</i></b>     |                             |            |          |          |                  |
| P28331                                                                                                              | R.ALSEIAGMTLPYDTLDQVR.N     | 2093.058   | 2        | 0.309    | 2.587            |
| <b><i>NADH-ubiquinone oxidoreductase B12 subunit (EC 1.6.5.3) (EC 1.6.99.3) (Complex I-B12) (CI-B12)</i></b>        |                             |            |          |          |                  |
| O43676                                                                                                              | K.IEGTPLETIQK.K             | 1228.678   | 2        | 0.835    | 0.259            |
| <b><i>NADH-ubiquinone oxidoreductase chain 4 (EC 1.6.5.3) (NADH dehydrogenase subunit 4)</i></b>                    |                             |            |          |          |                  |
| P03905                                                                                                              | R.LTLILNPLTK.H              | 1125.724   | 1        | 0.877    | 0.469            |
| <b><i>NADPH--cytochrome P450 reductase (EC 1.6.2.4) (CPR) (P450R)</i></b>                                           |                             |            |          |          |                  |
| P16435                                                                                                              | R.ESSFVEK.M                 | 825.399    | 1        | 0.836    | 1.3              |
| P16435                                                                                                              | K.IQTLTSSVR.E               | 1004.573   | 2        | 0.392    | 0.674            |
| P16435                                                                                                              | R.YESGDHVAVYPANDSALVNQLGK.I | 2447.184   | 2        | 0.598    | 2.038            |
| P16435                                                                                                              | K.FAVFGLGNK.T               | 952.525    | 1        | 0.891    | 0.114            |
| P16435                                                                                                              | R.SDEDYLYR.E                | 1060.458   | 2        | 0.693    | 0.535            |
| P16435                                                                                                              | K.RLEQLGAQR.I               | 1070.606   | 2        | 0.737    | 0.564            |
| P16435                                                                                                              | R.YYSIASSSK[V               | 1009.497   | 1        | 0.833    | 1.51             |
| P16435                                                                                                              | R.ESSFVEK[M                 | 829.407    | 1        | 0.765    | 1.103            |
| P16435                                                                                                              | K.FAVFGLGNK.T               | 952.525    | 2        | 0.761    | 0.425            |
| P16435                                                                                                              | R.SDEDYLYR.E                | 1060.458   | 1        | 0.697    | 0.316            |
| P16435                                                                                                              | K.NPFLAAVTTNR.K             | 1203.648   | 1        | 0.881    | 0.412            |
| <b><i>Nascent polypeptide-associated complex alpha subunit (NAC-alpha) (Alpha-NAC) (Hom s 2.02)</i></b>             |                             |            |          |          |                  |
| Q13765                                                                                                              | K.IEDLSQQAQLAAAEKFK.V       | 1889.997   | 2        | 0.473    | 0.976            |
| <b><i>NEDD4-like ubiquitin ligase 1</i></b>                                                                         |                             |            |          |          |                  |
| Q9HCC7                                                                                                              | R.GGYHDGHLVIRWFVAVER[F      | 2273.149   | 2        | 0.811    | 0.78             |
| <b><i>Neural cell adhesion molecule L1 precursor (N-CAM L1) (CD171 antigen)</i></b>                                 |                             |            |          |          |                  |
| P32004                                                                                                              | K.VGEEDDGEYR[C              | 1172.483   | 2        | 0.563    | 1.322            |
| P32004                                                                                                              | R.LVVFPDDISLK.C             | 1346.757   | 2        | 0.927    | 0.139            |
| <b><i>Neutral alpha-glucosidase AB precursor (EC 3.2.1.84) (Glucosidase II alpha subunit)</i></b>                   |                             |            |          |          |                  |
| Q14697                                                                                                              | K.DPAEGDGAQPEETPR.D         | 1568.682   | 2        | 0.43     | 1.208            |
| <b><i>Neutral amino acid transporter B(0) (ATB(0)) (Sodium-dependent neutral amino acid transporter type 2)</i></b> |                             |            |          |          |                  |
| Q15758                                                                                                              | R.STEPELIQVK.S              | 1143.626   | 2        | 0.407    | 0.931            |

| <b>Acc No</b>                                                                                               | <b>Peptide</b>            | <b>MH+</b> | <b>z</b> | <b>f</b> | <b>H/L ratio</b> |
|-------------------------------------------------------------------------------------------------------------|---------------------------|------------|----------|----------|------------------|
| Q15758                                                                                                      | R.GPAGDATVASEK.E          | 1102.537   | 2        | 0.357    | 1.484            |
| Q15758                                                                                                      | R.GPAGDATVASEK.E          | 1102.537   | 1        | 0.709    | 0.744            |
| Q15758                                                                                                      | K.SELPLDPLVPTEEGNPLLK.H   | 2158.164   | 2        | 0.817    | 1.032            |
| Q15758                                                                                                      | K.EVLDSFLDLAR.N           | 1277.674   | 2        | 0.629    | 0.45             |
| <b>NGT</b>                                                                                                  |                           |            |          |          |                  |
| Q9H2Q2                                                                                                      | R.SSLFELAK.K              | 894.493    | 2        | 0.708    | 0.569            |
| <b>Novel protein</b>                                                                                        |                           |            |          |          |                  |
| Q5JP08                                                                                                      | R.EFDSSTLNESVR.N          | 1383.639   | 2        | 0.91     | 0.261            |
| Q5VZP5                                                                                                      | R.TPESSEREESPEPQR.P       | 1757.794   | 2        | 0.332    | 0.675            |
| <b>Nucleolar RNA helicase 2 (EC 3.6.1.-) (Nucleolar RNA helicase II) (Nucleolar RNA helicase Gu)</b>        |                           |            |          |          |                  |
| <b>(RH)</b>                                                                                                 |                           |            |          |          |                  |
| Q9NR30                                                                                                      | K.DFSDITK.K               | 825.399    | 1        | 0.809    | 0.779            |
| <b>OK/SW-CL.16</b>                                                                                          |                           |            |          |          |                  |
| Q8NI70                                                                                                      | R.RALAPNR.H               | 797.474    | 1        | 0.678    | 0.371            |
| <b>OTTHUMP00000017314 (Fragment)</b>                                                                        |                           |            |          |          |                  |
| Q5JUJ7                                                                                                      | K.EQETVLQAQVRPGGR.G       | 1667.882   | 2        | 0.469    | 0.932            |
| <b>OTTHUMP00000021035</b>                                                                                   |                           |            |          |          |                  |
| Q4VXA4                                                                                                      | R.AGDNILAVLK.H            | 1013.599   | 2        | 0.785    | 0.435            |
| <b>Peptidyl-prolyl cis-trans isomerase B precursor (EC 5.2.1.8) (PPIase) (Rotamase) (Cyclophilin B) (S-</b> |                           |            |          |          |                  |
| P23284                                                                                                      | R.VIFGLFGK.T              | 880.529    | 1        | 0.594    | 0.753            |
| <b>Pericentrin (Pericentrin B) (Kendrin)</b>                                                                |                           |            |          |          |                  |
| O95613                                                                                                      | K.RLEEMNINIRK.K           | 1415.779   | 2        | 0.996    | 0.997            |
| <b>Phosphate carrier protein, mitochondrial precursor (PTP)</b>                                             |                           |            |          |          |                  |
| Q00325                                                                                                      | R.IQTQPGYANTLR.D          | 1361.717   | 2        | 0.58     | 0.498            |
| Q00325                                                                                                      | R.IQTQPGYANTLR.D          | 1361.717   | 1        | 0.647    | 0.655            |
| Q00325                                                                                                      | R.IQTQPGYANTLR.D          | 1361.717   | 1        | 0.664    | 0.717            |
| <b>Phosphatidate cytidyltransferase 2 (EC 2.7.7.41) (CDP-diglyceride synthetase 2) (CDP-diglyceride</b>     |                           |            |          |          |                  |
| O95674                                                                                                      | R.AESAPLPVSADDTPEVLNR.A   | 1980.987   | 2        | 0.701    | 0.622            |
| O95674                                                                                                      | K.VDGETASDSES.R.A         | 1252.529   | 2        | 0.348    | 2.667            |
| O95674                                                                                                      | K.VDGETASDSES.R.A         | 1252.529   | 2        | 0.419    | 3.035            |
| O95674                                                                                                      | R.AESAPLPVSADDTPEVLNR[A   | 1984.995   | 2        | 0.709    | 0.528            |
| <b>Phosphatidylserine synthase 2 (EC 2.7.8.-) (PtdSer synthase 2) (PSS-2) (Serine-exchange enzyme II)</b>   |                           |            |          |          |                  |
| Q9BVG9                                                                                                      | R.ASLEPPDGPSAGQATGPGEGR.R | 2079.958   | 2        | 0.863    | 0.752            |
| Q9BVG9                                                                                                      | R.ASLEPPDGPSAGQATGPGEGR.R | 2079.958   | 2        | 0.857    | 0.456            |
| Q9BVG9                                                                                                      | R.DAGGPRPESPVPAGR[A       | 1466.748   | 2        | 0.552    | 0.982            |

| Acc No                                                                                                              | Peptide                | MH+      | z | f     | H/L ratio |
|---------------------------------------------------------------------------------------------------------------------|------------------------|----------|---|-------|-----------|
| <b><i>Photolyase (Cryptochrome 1)</i></b>                                                                           |                        |          |   |       |           |
| Q16526                                                                                                              | K.LSIEYDSEPF GK.E      | 1384.663 | 2 | 0.545 | 0.306     |
| Q16526                                                                                                              | K.LSIEYDSEPF GK.E      | 1384.663 | 2 | 0.674 | 0.233     |
| <b><i>Pinin (140 kDa nuclear and cell adhesion-related phosphoprotein) (Domain-rich serine protein) (DRS-</i></b>   |                        |          |   |       |           |
| Q9H307                                                                                                              | K.LTEVPVEPVLTVHPESK.S  | 1874.027 | 2 | 0.659 | 1.307     |
| Q9H307                                                                                                              | K.KPALQSSVVATSK.E      | 1315.758 | 2 | 0.81  | 0.757     |
| <b><i>PNAS-117</i></b>                                                                                              |                        |          |   |       |           |
| Q9HB66                                                                                                              | K.NDDIPEQDSLGLSNLQK.S  | 1885.914 | 2 | 0.762 | 0.338     |
| Q9HB66                                                                                                              | K.NDDIPEQDSLGLSNLQK.S  | 1885.914 | 2 | 0.627 | 0.524     |
| <b><i>Polymerase I and transcript release factor (PTRF protein)</i></b>                                             |                        |          |   |       |           |
| Q6NZI2                                                                                                              | K.IIGAVDQIQLTQAQLEER.Q | 2025.098 | 2 | 0.695 | 0.55      |
| <b><i>Postreplication repair protein RAD18 (hRAD18) (hHR18) (RING finger protein 73)</i></b>                        |                        |          |   |       |           |
| Q9NS91                                                                                                              | K.NLAVKVYTPVASRQSLK[.Q | 1878.094 | 2 | 0.696 | 0.178     |
| <b><i>PRKR interacting protein 1 (IL11 inducible)</i></b>                                                           |                        |          |   |       |           |
| Q96CF8                                                                                                              | K.NAAEEQKCLKLER.L      | 1428.781 | 2 | 0.572 | 1.006     |
| <b><i>Probable cation-transporting ATPase 13A1 (EC 3.6.3.-)</i></b>                                                 |                        |          |   |       |           |
| Q9HD20                                                                                                              | R.SPQENLVPC*DVLLLR.G   | 1752.931 | 2 | 0.679 | 0.549     |
| Q9HD20                                                                                                              | K.EFVITSLK.E           | 936.54   | 1 | 0.598 | 0.635     |
| Q9HD20                                                                                                              | K.EPIEDLSPDR.V         | 1170.564 | 2 | 0.811 | 0.774     |
| <b><i>Probable endonuclease KIAA0830 precursor (EC 3.1.30.-)</i></b>                                                |                        |          |   |       |           |
| O94919                                                                                                              | R.STLLPPEASEGSSFLGK.L  | 1806.912 | 2 | 0.675 | 0.916     |
| <b><i>Probable mitochondrial import receptor subunit TOM40 homolog (Translocase of outer membrane 40 kDa)</i></b>   |                        |          |   |       |           |
| O96008                                                                                                              | R.RPGEEGTVMFLAGK.Y     | 1431.726 | 2 | 0.772 | 0.62      |
| O96008                                                                                                              | K.MAIQTQQSK.F          | 1034.53  | 1 | 0.839 | 0.264     |
| <b><i>Programmed cell death 6-interacting protein (PDCD6-interacting protein) (ALG-2 interacting protein 1)</i></b> |                        |          |   |       |           |
| Q8WUM4                                                                                                              | R.LLDEEEATDNDLR.A      | 1532.708 | 2 | 0.402 | 0.558     |
| <b><i>Prohibitin</i></b>                                                                                            |                        |          |   |       |           |
| P35232                                                                                                              | R.IFTSIGEDYDER.V       | 1444.659 | 1 | 0.674 | 0.461     |
| P35232                                                                                                              | R.NVPVITGSK.D          | 914.531  | 1 | 0.995 | 0.358     |
| P35232                                                                                                              | R.PVASQLPR.I           | 867.505  | 1 | 0.795 | 0.256     |
| P35232                                                                                                              | R.IFTSIGEDYDER[.V      | 1448.667 | 2 | 0.982 | 0.4       |
| P35232                                                                                                              | K.AAIIAEGDSK.A         | 1061.547 | 2 | 0.945 | 1.36      |
| P35232                                                                                                              | R.IFTSIGEDYDER.V       | 1444.659 | 2 | 0.848 | 0.726     |
| P35232                                                                                                              | K.AAIIAEGDSK.A         | 1061.547 | 1 | 0.926 | 0.252     |

| Acc No | Peptide           | MH+      | z | f     | H/L ratio |
|--------|-------------------|----------|---|-------|-----------|
| P35232 | R.NVPVITGSK[D     | 918.539  | 1 | 0.852 | 0.318     |
| P35232 | R.IILFRPVASQLPR.I | 1396.842 | 2 | 0.62  | 0.385     |

***Prohibitin-2 (B-cell receptor-associated protein BAP37) (Repressor of estrogen receptor activity) (D-***

|        |                       |          |   |       |       |
|--------|-----------------------|----------|---|-------|-------|
| Q99623 | R.IGGVQQDTILAEGLHFR.I | 1857.995 | 2 | 0.76  | 0.872 |
| Q99623 | R.LGLDYEER.V          | 994.484  | 1 | 0.717 | 0.706 |
| Q99623 | R.LGLDYEER.V          | 994.484  | 2 | 0.532 | 0.848 |
| Q99623 | R.EYTAAVEAK[.Q        | 985.497  | 1 | 0.88  | 0.646 |
| Q99623 | K.QVAQQAQR.A          | 1057.538 | 2 | 0.983 | 1.398 |
| Q99623 | R.VLPSIVNEVLK.S       | 1210.741 | 2 | 0.338 | 2.843 |
| Q99623 | K.QVAQQAQR.A          | 1057.538 | 1 | 0.63  | 1.019 |
| Q99623 | R.IGGVQQDTILAEGLHFR.I | 1853.987 | 3 | 0.597 | 1.678 |
| Q99623 | R.IGGVQQDTILAEGLHFR.I | 1853.987 | 3 | 0.516 | 1.182 |
| Q99623 | R.LPAGPR.G            | 610.367  | 1 | 0.956 | 0.468 |
| Q99623 | K.FNASQLITQR.A        | 1177.632 | 2 | 0.397 | 0.62  |
| Q99623 | K.IVQAEGEAEAAK.M      | 1215.622 | 1 | 0.453 | 0.797 |
| Q99623 | R.IGGVQQDTILAEGLHFR.I | 1853.987 | 3 | 0.859 | 0.626 |
| Q99623 | R.AQVLLIR.R           | 899.567  | 1 | 0.695 | 0.506 |
| Q99623 | R.VLPSIVNEVLK.S       | 1210.741 | 1 | 0.517 | 1.111 |
| Q99623 | K.IVQAEGEAEAAK.M      | 1215.622 | 2 | 0.408 | 1.083 |
| Q99623 | R.EYTAAVEAK[.Q        | 985.497  | 1 | 0.995 | 0.836 |
| Q99623 | R.LGLDYEER.V          | 994.484  | 2 | 0.606 | 0.636 |
| Q99623 | R.IGGVQQDTILAEGLHFR.I | 1857.995 | 2 | 0.856 | 0.791 |
| Q99623 | R.VLPSIVNEVLK.S       | 1210.741 | 1 | 0.491 | 1.301 |
| Q99623 | R.LPAGPR.G            | 610.367  | 1 | 0.926 | 0.466 |
| Q99623 | K.LLLGAGAVAYGVR.E     | 1259.747 | 2 | 0.732 | 0.675 |
| Q99623 | K.FNASQLITQR[.A       | 1181.64  | 1 | 0.631 | 0.995 |
| Q99623 | K.IVQAEGEAEAAK.M      | 1215.622 | 1 | 0.497 | 0.747 |
| Q99623 | R.LGLDYEER.V          | 994.484  | 1 | 0.734 | 0.714 |

***Prolactin regulatory element-binding protein (Mammalian guanine nucleotide exchange factor mSec12)***

|        |                       |          |   |       |       |
|--------|-----------------------|----------|---|-------|-------|
| Q9HCU5 | R.VENLQAVQTFSSDPLQK.V | 2019.003 | 2 | 0.544 | 0.917 |
|--------|-----------------------|----------|---|-------|-------|

***Prostaglandin E synthase (EC 5.3.99.3) (Microsomal glutathione S-transferase 1-like 1) (MGST1-L1) (p53-***

|        |                |          |   |       |       |
|--------|----------------|----------|---|-------|-------|
| O14684 | K.AFANPEDALR.H | 1103.548 | 2 | 0.554 | 0.201 |
|--------|----------------|----------|---|-------|-------|

***Protein C14orf106 (P243)***

|        |             |         |   |       |       |
|--------|-------------|---------|---|-------|-------|
| Q6P0N0 | K.YMAINQK.K | 867.439 | 1 | 0.998 | 0.667 |
|--------|-------------|---------|---|-------|-------|

***Protein C19orf21***

| <b>Acc No</b>                                                                                                       | <b>Peptide</b>            | <b>MH+</b> | <b>z</b> | <b>f</b> | <b>H/L ratio</b> |
|---------------------------------------------------------------------------------------------------------------------|---------------------------|------------|----------|----------|------------------|
| Q8IVT2                                                                                                              | R.ALSSDSILSPAPDAR.A       | 1499.77    | 2        | 0.672    | 0.717            |
| <b><i>Protein expressed in T-cells and eosinophils in atopic dermatitis (ETEA)</i></b>                              |                           |            |          |          |                  |
| Q96CS3                                                                                                              | R.DLTQEQTEK.L             | 1091.521   | 1        | 0.843    | 0.229            |
| <b><i>Protein KIAA0152 precursor</i></b>                                                                            |                           |            |          |          |                  |
| Q14165                                                                                                              | R.SNPEDQILYQTER.Y         | 1592.755   | 2        | 0.398    | 0.835            |
| <b><i>Protein KIAA1045</i></b>                                                                                      |                           |            |          |          |                  |
| Q9UPV7                                                                                                              | K.EAEAGTSVVQEESAGRAAWER.L | 2320.08    | 2        | 0.78     | 0.118            |
| <b><i>Protein transport protein Sec61 beta subunit</i></b>                                                          |                           |            |          |          |                  |
| P60468                                                                                                              | R.FYTEDSPGLK.V            | 1156.552   | 1        | 0.718    | 0.257            |
| P60468                                                                                                              | R.FYTEDSPGLK.V            | 1156.552   | 1        | 0.645    | 0.261            |
| P60468                                                                                                              | -.PGPTPSGTVNGSSGR.S       | 1370.666   | 1        | 0.665    | 0.447            |
| P60468                                                                                                              | -.PGPTPSGTVNGSSGR.S       | 1370.666   | 2        | 0.372    | 0.396            |
| P60468                                                                                                              | R.FYTEDSPGLK.V            | 1156.552   | 2        | 0.514    | 9.559            |
| P60468                                                                                                              | -.PGPTPSGTVNGSSGR.S       | 1370.666   | 2        | 0.357    | 0.461            |
| <b><i>Putative 40-9-1 protein</i></b>                                                                               |                           |            |          |          |                  |
| Q96QD8                                                                                                              | K.TANEGGSLLYEQLGYK.A      | 1742.86    | 2        | 0.634    | 0.734            |
| <b><i>Putative Polycomb group protein ASXL1 (Additional sex combs-like protein 1)</i></b>                           |                           |            |          |          |                  |
| Q8IXJ9                                                                                                              | K.QESEQAGVAK.D            | 1046.511   | 2        | 0.35     | 0.202            |
| <b><i>Rap guanine nucleotide exchange factor 2 (PDZ domain containing guanine nucleotide exchange factor 1)</i></b> |                           |            |          |          |                  |
| Q9Y4G8                                                                                                              | K.INQGLQVPAVSLYPSRKK[V    | 2002.157   | 2        | 0.781    | 0.333            |
| <b><i>Ras GTPase-activating-like protein IQGAP1 (p195)</i></b>                                                      |                           |            |          |          |                  |
| P46940                                                                                                              | K.EELQSGVDAANSAQQYQR.R    | 2064.958   | 2        | 0.852    | 0.435            |
| <b><i>Ras-related protein Rab-10</i></b>                                                                            |                           |            |          |          |                  |
| P61026                                                                                                              | K.SFENISK.W               | 824.415    | 1        | 0.854    | 0.613            |
| <b><i>Ras-related protein Rab-14</i></b>                                                                            |                           |            |          |          |                  |
| P61106                                                                                                              | R.LTSEPQQR[E              | 1059.556   | 1        | 0.781    | 0.454            |
| <b><i>Ras-related protein Rab-2A</i></b>                                                                            |                           |            |          |          |                  |
| P61019                                                                                                              | K.IQEGVFDINNEANGIK.I      | 1760.881   | 2        | 0.795    | 0.69             |
| P61019                                                                                                              | K.TASNVEEAFINTAK[E        | 1498.751   | 2        | 0.576    | 1.238            |
| P61019                                                                                                              | K.IQEGVFDINNEANGIK.I      | 1760.881   | 2        | 0.507    | 0.677            |
| <b><i>Ras-related protein Rab-34 (Rab-39) (Ras-related protein Rah)</i></b>                                         |                           |            |          |          |                  |
| Q9BZG1                                                                                                              | R.INSDDSNLYLTASK.K        | 1540.749   | 2        | 0.451    | 0.527            |
| <b><i>Ras-related protein Rab-5C (RAB5L) (L1880)</i></b>                                                            |                           |            |          |          |                  |
| P51148                                                                                                              | K.NEPQATGAPGR.N           | 1211.576   | 2        | 0.527    | 1.167            |



| Acc No                                                                                                               | Peptide                  | MH+      | z | f     | H/L ratio |
|----------------------------------------------------------------------------------------------------------------------|--------------------------|----------|---|-------|-----------|
| P51148                                                                                                               | R.GVDLQENNPASR.S         | 1299.629 | 2 | 0.314 | 3.965     |
| <b><i>Ras-related protein Rab-7</i></b>                                                                              |                          |          |   |       |           |
| P51149                                                                                                               | R.DEFLIQASPR.D           | 1175.605 | 1 | 0.886 | 0.433     |
| P51149                                                                                                               | R.DPENFPFVVLGNK.I        | 1475.753 | 2 | 0.59  | 0.732     |
| P51149                                                                                                               | R.LVTMQIWDTAGQER.F       | 1647.816 | 2 | 0.306 | 3.944     |
| P51149                                                                                                               | K.ATIGADFLTK.E           | 1036.567 | 2 | 0.842 | 0.401     |
| P51149                                                                                                               | R.FQSLGVAFYR.G           | 1187.621 | 2 | 0.618 | 0.895     |
| P51149                                                                                                               | K.ATIGADFLTK.E           | 1036.567 | 1 | 0.681 | 0.559     |
| P51149                                                                                                               | K.NNIPYFETSAK.E          | 1283.627 | 2 | 0.699 | 1.631     |
| P51149                                                                                                               | K.QETEVELYNEFPEPIK.L     | 1964.949 | 2 | 0.347 | 2.67      |
| P51149                                                                                                               | K.VIILGDSGVGK.T          | 1057.625 | 2 | 0.822 | 3.896     |
| P51149                                                                                                               | R.DEFLIQASPR.D           | 1175.605 | 2 | 0.721 | 0.805     |
| <b><i>Ras-related protein Rab-9A (Rab-9)</i></b>                                                                     |                          |          |   |       |           |
| P51151                                                                                                               | K.EPESFPFVILGNK.I        | 1476.773 | 2 | 0.824 | 0.237     |
| <b><i>Retinoic acid-induced protein 3 (G-protein coupled receptor family C group 5 member A) (Retinoic acid-</i></b> |                          |          |   |       |           |
| Q8NFJ5                                                                                                               | R.TNVNVFSELSAPR[.R       | 1437.746 | 2 | 0.6   | 1.052     |
| Q8NFJ5                                                                                                               | R.TNVNVFSELSAPR.R        | 1433.738 | 2 | 0.602 | 1.077     |
| Q8NFJ5                                                                                                               | R.NPMDYPVEDAFC*KPQLVK[.K | 2155.033 | 2 | 0.641 | 0.84      |
| Q8NFJ5                                                                                                               | R.TNVNVFSELSAPR.R        | 1433.738 | 1 | 0.83  | 0.597     |
| Q8NFJ5                                                                                                               | R.TNVNVFSELSAPR.R        | 1433.738 | 2 | 0.592 | 1.111     |
| <b><i>RNA-binding protein with serine-rich domain 1 (SR-related protein LDC2)</i></b>                                |                          |          |   |       |           |
| Q15287                                                                                                               | K.GYAYVEFENPDEAEK.A      | 1760.765 | 2 | 0.729 | 0.321     |
| <b><i>RPS27L protein</i></b>                                                                                         |                          |          |   |       |           |
| Q49A11                                                                                                               | R.DLLHPSLEEEK.K          | 1309.663 | 2 | 0.351 | 0.42      |
| <b><i>Ryanodine receptor 3 (Brain-type ryanodine receptor) (RyR3) (RYR-3) (Brain ryanodine receptor-calcium</i></b>  |                          |          |   |       |           |
| Q15413                                                                                                               | K.KYDPDLFR.M             | 1053.536 | 2 | 0.87  | 1.769     |
| <b><i>Sarcoplasmic/endoplasmic reticulum calcium ATPase 2 (EC 3.6.3.8) (Calcium pump 2) (SERCA2) (SR</i></b>         |                          |          |   |       |           |
| P16615                                                                                                               | R.IGIFGQDEDVTSK.A        | 1408.696 | 2 | 0.927 | 0.46      |
| P16615                                                                                                               | R.DEMVATEQER.T           | 1207.526 | 2 | 0.629 | 0.629     |
| P16615                                                                                                               | R.EEMHLEDSANFIK[.Y       | 1566.724 | 2 | 0.415 | 1.115     |
| P16615                                                                                                               | R.IEVASSVK.L             | 832.477  | 1 | 0.617 | 0.515     |
| P16615                                                                                                               | R.NYLEPGK.E              | 820.42   | 1 | 0.503 | 0.422     |
| <b><i>Scavenger receptor class B member 1 (SRB1) (SR-BI) (CD36 antigen-like 1) (CD36 and LIMPII analogus</i></b>     |                          |          |   |       |           |
| Q8WTV0                                                                                                               | K.SVAGIGQTGK.I           | 917.505  | 1 | 0.721 | 0.619     |

| Acc No                                                                                                               | Peptide                      | MH+      | z | f     | H/L ratio |
|----------------------------------------------------------------------------------------------------------------------|------------------------------|----------|---|-------|-----------|
| <b><i>SCO1 protein homolog, mitochondrial precursor</i></b>                                                          |                              |          |   |       |           |
| O75880                                                                                                               | R.EEVDQVAR[A                 | 949.472  | 1 | 0.716 | 0.882     |
| <b><i>Secretory carrier membrane protein 3</i></b>                                                                   |                              |          |   |       |           |
| Q4VX17                                                                                                               | R.QYATLDVYNPFETR.E           | 1716.823 | 2 | 0.997 | 0.406     |
| <b><i>Sequestosome-1 (Phosphotyrosine-independent ligand for the Lck SH2 domain of 62 kDa) (Ubiquitin-</i></b>       |                              |          |   |       |           |
| Q13501                                                                                                               | R.PGPTAESASGPSEDPSVNFLK.N    | 2086.993 | 2 | 0.744 | 0.928     |
| <b><i>SH3-binding kinase</i></b>                                                                                     |                              |          |   |       |           |
| Q52WX2                                                                                                               | R.EVSITNSLSSSPFIK.V          | 1721.932 | 2 | 0.654 | 0.441     |
| <b><i>Sideroflexin-1 (Tricarboxylate carrier protein) (TCC)</i></b>                                                  |                              |          |   |       |           |
| Q9H9B4                                                                                                               | K.VGIPVTDENGR.L              | 1270.639 | 2 | 0.832 | 0.968     |
| Q9H9B4                                                                                                               | R.NILLTNEQLESAR[K            | 1504.81  | 2 | 0.821 | 1.277     |
| Q9H9B4                                                                                                               | K.QAITQVVVSR.I               | 1100.642 | 1 | 0.686 | 0.394     |
| <b><i>Signal peptidase complex subunit 2 (EC 3.4.-.-) (Microsomal signal peptidase 25 kDa subunit) (SPase 25</i></b> |                              |          |   |       |           |
| Q15005                                                                                                               | K.NSLDDSAK.K                 | 849.395  | 1 | 0.907 | 0.096     |
| Q15005                                                                                                               | R.SGGSGGC*SGAGGASNC*GTGSGR[S | 1861.728 | 2 | 0.816 | 0.505     |
| Q15005                                                                                                               | R.SGGSGGC*SGAGGASNC*GTGSGR.S | 1857.72  | 2 | 0.769 | 0.662     |
| Q15005                                                                                                               | R.SGGSGGC*SGAGGASNC*GTGSGR[S | 1861.728 | 2 | 0.792 | 0.532     |
| <b><i>Signal peptidase complex subunit 3 (EC 3.4.-.-) (Microsomal signal peptidase 23 kDa subunit) (SPase 22</i></b> |                              |          |   |       |           |
| P61009                                                                                                               | K.NNALNQVVLWDK.I             | 1413.749 | 2 | 0.593 | 1.428     |
| <b><i>Signal recognition particle receptor beta subunit (SR-beta) (Protein APMCF1)</i></b>                           |                              |          |   |       |           |
| Q9Y5M8                                                                                                               | R.DTQTSITDSC*AVYR.V          | 1616.722 | 2 | 0.392 | 0.61      |
| Q9Y5M8                                                                                                               | R.SAAPSTLDSSSTAPAQLGK.K      | 1788.897 | 2 | 0.808 | 0.239     |
| <b><i>Similar to mouse I500009M05Rik protein</i></b>                                                                 |                              |          |   |       |           |
| Q8N5K1                                                                                                               | K.DSLINLK.I                  | 802.467  | 1 | 0.99  | 0.5       |
| <b><i>Sodium/potassium-transporting ATPase alpha-1 chain precursor (EC 3.6.3.9) (Sodium pump 1) (Na+/K+</i></b>      |                              |          |   |       |           |
| P05023                                                                                                               | K.IVEIPFNSTNK.Y              | 1261.679 | 2 | 0.606 | 0.408     |
| P05023                                                                                                               | R.AVFQANQENLPILK.R           | 1584.874 | 2 | 0.951 | 0.285     |
| <b><i>Solute carrier family 2, facilitated glucose transporter member 1 (Glucose transporter type 1,</i></b>         |                              |          |   |       |           |
| P11166                                                                                                               | R.TFDEIASGFR.Q               | 1142.548 | 2 | 0.735 | 0.338     |
| P11166                                                                                                               | R.TFDEIASGFR.Q               | 1142.548 | 2 | 0.984 | 0.699     |
| <b><i>Solute carrier family 25 member 24, isoform 1</i></b>                                                          |                              |          |   |       |           |
| Q6NUK1                                                                                                               | R.NLGIPLGQDAEEK.I            | 1383.711 | 2 | 0.963 | 0.07      |
| <b><i>Sorting and assembly machinery component 50 homolog</i></b>                                                    |                              |          |   |       |           |
| Q9Y512                                                                                                               | K.VTGQFPWSSLR.E              | 1277.664 | 2 | 0.73  | 0.313     |

| Acc No | Peptide              | MH+      | z | f     | H/L ratio |
|--------|----------------------|----------|---|-------|-----------|
| Q9Y512 | K.VNQELAGYTGDDVSIK.E | 1797.902 | 2 | 0.547 | 1.234     |
| Q9Y512 | K.NLIEVMR.K          | 874.482  | 1 | 0.673 | 0.608     |
| Q9Y512 | R.NSSILPR.R          | 786.447  | 1 | 0.798 | 0.555     |
| Q9Y512 | K.QEILENK.D          | 873.468  | 1 | 0.512 | 0.712     |
| Q9Y512 | R.NSSILPR.R          | 786.447  | 1 | 0.9   | 0.637     |
| Q9Y512 | R.FYLGGPSVR.G        | 1096.579 | 2 | 0.766 | 0.333     |

**Source of immunodominant MHC-associated peptides**

|        |                    |          |   |       |       |
|--------|--------------------|----------|---|-------|-------|
| Q8TCJ2 | R.ENPPVEDSDEDDKR.N | 1731.73  | 2 | 0.366 | 3.79  |
| Q8TCJ2 | R.ESDYFTPQGEFR[V   | 1479.652 | 2 | 0.583 | 0.949 |

**Spectrin alpha chain, brain (Spectrin, non-erythroid alpha chain) (Alpha-II spectrin) (Fodrin alpha chain)**

|        |                        |          |   |       |       |
|--------|------------------------|----------|---|-------|-------|
| Q13813 | K.LQTASDESYKDPTNIQSK[H | 2028.985 | 2 | 0.922 | 0.418 |
| Q13813 | K.VNSLGETAER.L         | 1075.538 | 2 | 0.622 | 0.75  |
| Q13813 | K.VLETAEDIQER.R        | 1302.654 | 2 | 0.9   | 0.068 |
| Q13813 | K.DLASVNLLK.K          | 1086.615 | 2 | 0.833 | 0.857 |
| Q13813 | K.LLEAQSHFR[K          | 1104.593 | 2 | 0.82  | 1.745 |
| Q13813 | K.VLETAEDIQER.R        | 1302.654 | 2 | 0.629 | 0.119 |
| Q13813 | K.AINVQEEK.I           | 930.489  | 1 | 0.925 | 0.921 |
| Q13813 | K.AINVQEEK.I           | 930.489  | 1 | 0.903 | 1.37  |
| Q13813 | R.DLAALGDK.V           | 802.43   | 1 | 0.982 | 0.339 |
| Q13813 | R.SQLLGSHEVQR.F        | 1324.697 | 2 | 0.764 | 0.445 |
| Q13813 | R.DLSSVQTLTK.Q         | 1204.678 | 2 | 0.844 | 0.447 |
| Q13813 | K.DLTNVQNLQK.K         | 1172.627 | 2 | 0.655 | 0.75  |
| Q13813 | K.LQIASDENYKDPTNLQGK.L | 2034.014 | 2 | 0.565 | 1.083 |
| Q13813 | K.DLTNVQNLQK.K         | 1172.627 | 1 | 0.539 | 0.924 |

**Spectrin beta chain, brain 1 (Spectrin, non-erythroid beta chain 1) (Beta-II spectrin) (Fodrin beta chain)**

|        |                         |          |   |       |       |
|--------|-------------------------|----------|---|-------|-------|
| Q01082 | R.AQTLPTSVVTITSESSPGK.R | 1903.002 | 2 | 0.474 | 0.664 |
| Q01082 | K.TALPAQSAATLPAR.T      | 1367.764 | 1 | 0.409 | 1.079 |

**SPFH domain protein 1 precursor (Protein KE04)**

|        |                    |          |   |       |       |
|--------|--------------------|----------|---|-------|-------|
| O75477 | K.EALEPSGENVIQNK.E | 1527.765 | 2 | 0.557 | 2.052 |
|--------|--------------------|----------|---|-------|-------|

**SPFH domain protein 2 precursor**

|        |                     |          |   |       |       |
|--------|---------------------|----------|---|-------|-------|
| O94905 | K.LSFGLEDEPLETATK[E | 1653.835 | 2 | 0.647 | 0.502 |
|--------|---------------------|----------|---|-------|-------|

**Splicing coactivator subunit SRm300**

|        |                         |          |   |       |       |
|--------|-------------------------|----------|---|-------|-------|
| Q9UHA8 | R.AAFGISDSYVDGSSFDQSR.R | 2018.909 | 2 | 0.593 | 0.823 |
| Q9UHA8 | R.SPVPSAFSDQSR.C        | 1277.612 | 2 | 0.912 | 0.368 |
| Q9UHA8 | R.SPVPSAFSDQSR.C        | 1277.612 | 1 | 0.752 | 0.7   |

| Acc No                                                                                                               | Peptide                      | MH+      | z | f     | H/L ratio |
|----------------------------------------------------------------------------------------------------------------------|------------------------------|----------|---|-------|-----------|
| <b><i>Steroid dehydrogenase homolog (Fragment)</i></b>                                                               |                              |          |   |       |           |
| Q53GQ0                                                                                                               | R.TIAVDFASEDIYDK.I           | 1586.758 | 2 | 0.419 | 0.361     |
| <b><i>Supervillin (Archvillin) (p205/p250)</i></b>                                                                   |                              |          |   |       |           |
| O95425                                                                                                               | R.YQTQPVTLGVEVEQVQSGK.L      | 1991.008 | 2 | 0.45  | 0.6       |
| <b><i>Synaptic glycoprotein SC2</i></b>                                                                              |                              |          |   |       |           |
| Q9NZ01                                                                                                               | R.LLETLFVHR.F                | 1127.657 | 2 | 0.923 | 0.244     |
| <b><i>Tetratricopeptide repeat protein KIAA0103</i></b>                                                              |                              |          |   |       |           |
| Q15006                                                                                                               | R.ILQEDPTNTAAR].K            | 1332.688 | 2 | 0.6   | 1.144     |
| Q15006                                                                                                               | R.ILQEDPTNTAAR.K             | 1328.681 | 2 | 0.668 | 0.876     |
| <b><i>THAP domain-containing protein 2</i></b>                                                                       |                              |          |   |       |           |
| Q9H0W7                                                                                                               | K.ILEQDQDQDKTLLSLNLK.Q       | 1999.107 | 2 | 0.76  | 0.516     |
| Q9H0W7                                                                                                               | K.ILEQDQDQDKTLLSLNLK.Q       | 1999.107 | 2 | 0.69  | 0.456     |
| <b><i>Thioredoxin domain-containing protein 1 precursor (Transmembrane Trx-related protein)</i></b>                  |                              |          |   |       |           |
| <b><i>(Thioredoxin-</i></b>                                                                                          |                              |          |   |       |           |
| Q9H3N1                                                                                                               | K.VDVTEQPGLSGR.F             | 1257.643 | 2 | 0.853 | 0.342     |
| <b><i>Thioredoxin reductase 2 intronic transcript 1</i></b>                                                          |                              |          |   |       |           |
| Q6F5E7                                                                                                               | K.VFGQGFPSPLEEIKR].L         | 1707.92  | 2 | 0.612 | 0.447     |
| <b><i>Thyroid receptor-interacting protein 11 (TRIP-11) (Golgi-associated microtubule-binding protein 210)</i></b>   |                              |          |   |       |           |
| Q15643                                                                                                               | R.EKEFECHSMKEK.A             | 1524.682 | 2 | 0.56  | 0.057     |
| <b><i>TNF receptor-associated factor 5 (RING finger protein 84)</i></b>                                              |                              |          |   |       |           |
| O00463                                                                                                               | R.FVAHSVLENAKNAYIK.D         | 1803.975 | 2 | 0.4   | 1.03      |
| <b><i>Transcription factor 20 (Stromelysin 1 PDGF-responsive element-binding protein) (SPRE-binding protein)</i></b> |                              |          |   |       |           |
| Q9UGU0                                                                                                               | R.SASSNSAEAGGDTVTLDDILSLK].S | 2255.102 | 2 | 0.763 | 2.5       |
| <b><i>Transferrin receptor protein 1 (TfR1) (TR) (TfR) (Trfr) (CD71 antigen) (T9) (p90)</i></b>                      |                              |          |   |       |           |
| P02786                                                                                                               | R.EEPGEDFPAAR.R              | 1217.543 | 2 | 0.699 | 0.888     |
| P02786                                                                                                               | R.YNSQLLSFVR.D               | 1226.653 | 2 | 0.56  | 0.135     |
| P02786                                                                                                               | K.LAVDEEENADNNTK.A           | 1561.698 | 2 | 0.66  | 0.449     |
| P02786                                                                                                               | K.DSAQNSVIVDK.N              | 1288.674 | 2 | 0.926 | 0.862     |
| P02786                                                                                                               | K.LAVDEEENADNNTK.A           | 1561.698 | 2 | 0.627 | 0.542     |
| P02786                                                                                                               | K.VSASPLLYTLIEK].T           | 1437.833 | 2 | 0.776 | 0.323     |
| <b><i>Transformation/transcription domain-associated protein (350/400 kDa PCAF-associated factor)</i></b>            |                              |          |   |       |           |
| Q9Y4A5                                                                                                               | K.YLQFVAALTDVNTPEDETKLK].M   | 2270.205 | 2 | 0.732 | 1.161     |
| <b><i>Translocation protein SEC63 homolog</i></b>                                                                    |                              |          |   |       |           |
| Q9UGP8                                                                                                               | K.DATSRPTDNILIPQLIR].E       | 1927.074 | 2 | 0.709 | 0.908     |

| Acc No                                                                                                                     | Peptide                 | MH+      | z | f     | H/L ratio |
|----------------------------------------------------------------------------------------------------------------------------|-------------------------|----------|---|-------|-----------|
| <b><i>Translocon-associated protein alpha subunit precursor (TRAP-alpha) (Signal sequence receptor alpha)</i></b>          |                         |          |   |       |           |
| P43307                                                                                                                     | K.GEDFPANNIVK[F         | 1207.608 | 1 | 0.829 | 0.64      |
| <b><i>Translocon-associated protein delta subunit precursor (TRAP-delta) (Signal sequence receptor delta)</i></b>          |                         |          |   |       |           |
| P51571                                                                                                                     | R.FFDEESYSLLR.K         | 1405.663 | 2 | 0.806 | 0.267     |
| <b><i>Translocon-associated protein gamma subunit (TRAP-gamma) (Signal sequence receptor gamma subunit)</i></b>            |                         |          |   |       |           |
| Q9UNL2                                                                                                                     | K.QQSEEDLLLQDFSR.N      | 1707.818 | 2 | 0.438 | 0.484     |
| Q9UNL2                                                                                                                     | K.QQSEEDLLLQDFSR.N      | 1707.818 | 2 | 0.649 | 0.26      |
| <b><i>Transmembrane 9 superfamily protein member 2 precursor (p76)</i></b>                                                 |                         |          |   |       |           |
| Q99805                                                                                                                     | R.PSENLGQVLFGER.I       | 1445.738 | 2 | 0.467 | 0.747     |
| <b><i>Transmembrane anchor protein 1</i></b>                                                                               |                         |          |   |       |           |
| P84157                                                                                                                     | R.QEEEQDLGGEK.G         | 1319.56  | 2 | 0.634 | 0.908     |
| P84157                                                                                                                     | R.QEEEQDLGGEK.G         | 1319.56  | 2 | 0.371 | 1.141     |
| <b><i>Transmembrane emp24 domain containing protein 10 precursor (Transmembrane protein Tmp21) (21 kDa)</i></b>            |                         |          |   |       |           |
| P49755                                                                                                                     | K.NYEEIAK.V             | 866.425  | 1 | 0.737 | 0.527     |
| <b><i>Transmembrane emp24 domain containing protein 4 precursor</i></b>                                                    |                         |          |   |       |           |
| Q7Z7H5                                                                                                                     | R.LTSESTNQR.V           | 1035.506 | 1 | 0.675 | 1.332     |
| Q7Z7H5                                                                                                                     | R.LTSESTNQR[V           | 1039.515 | 1 | 0.702 | 1.171     |
| <b><i>Transmembrane emp24 domain containing protein 5 precursor</i></b>                                                    |                         |          |   |       |           |
| Q9Y3A6                                                                                                                     | R.NIQESNFDR.V           | 1122.517 | 1 | 0.316 | 1.324     |
| <b><i>Transmembrane emp24 domain containing protein 9 precursor (Glycoprotein 25L2)</i></b>                                |                         |          |   |       |           |
| Q9BVK6                                                                                                                     | R.QLVEQVEIQK.E          | 1341.737 | 2 | 0.62  | 1.372     |
| <b><i>Transmembrane protein 11 (Protein PM1)</i></b>                                                                       |                         |          |   |       |           |
| P17152                                                                                                                     | R.LGPGSSGGSAR.E         | 945.475  | 1 | 0.627 | 0.311     |
| <b><i>Transmembrane protein 33 (DB83 protein)</i></b>                                                                      |                         |          |   |       |           |
| P57088                                                                                                                     | R.ALLANALTSALR[L        | 1217.734 | 2 | 0.796 | 0.491     |
| P57088                                                                                                                     | K.LSANQQNILK.F          | 1128.637 | 2 | 0.99  | 0.395     |
| P57088                                                                                                                     | R.GSNSLPLLR.S           | 956.552  | 2 | 0.737 | 0.506     |
| P57088                                                                                                                     | R.ALLANALTSALR.L        | 1213.726 | 2 | 0.761 | 0.806     |
| <b><i>Transmembrane protein 49 (TDC1)</i></b>                                                                              |                         |          |   |       |           |
| Q96GC9                                                                                                                     | K.PFQEYLEAQR.Q          | 1280.627 | 2 | 0.909 | 0.467     |
| <b><i>Transmembrane protein PT27 (TPA regulated locus)</i></b>                                                             |                         |          |   |       |           |
| Q9HC07                                                                                                                     | K.LLNGPGDVETGTSITVPQK[K | 1930.026 | 2 | 0.644 | 0.29      |
| <b><i>Tricarboxylate transport protein, mitochondrial precursor (Citrate transport protein) (CTP) (Tricarboxylate)</i></b> |                         |          |   |       |           |

| Acc No                                                                                                                 | Peptide                      | MH+      | z | f     | H/L ratio |
|------------------------------------------------------------------------------------------------------------------------|------------------------------|----------|---|-------|-----------|
| P53007                                                                                                                 | K.TQLQLDER.S                 | 1002.521 | 1 | 0.825 | 0.513     |
| P53007                                                                                                                 | K.FIHDQTSNPVK.Y              | 1287.646 | 2 | 0.623 | 0.179     |
| <b><i>Tumor necrosis factor ligand superfamily member 4 (OX40 ligand) (OX40L) (Glycoprotein GP34) (TAX)</i></b>        |                              |          |   |       |           |
| P23510                                                                                                                 | R.VQPLEENVGNAARPRFER.L       | 2086.092 | 2 | 0.908 | 1.029     |
| <b><i>TXNDC14 protein</i></b>                                                                                          |                              |          |   |       |           |
| Q561W0                                                                                                                 | K.AGDNIPEEQPVASTPTTVSDGENK.K | 2456.142 | 2 | 0.395 | 0.979     |
| <b><i>Type-1 angiotensin II receptor-associated protein (AT1 receptor-associated protein)</i></b>                      |                              |          |   |       |           |
| Q6RW13                                                                                                                 | R.SAYQTIDSAEAPADPFVPEGR.S    | 2292.078 | 2 | 0.542 | 1.019     |
| <b><i>Ubiquinol-cytochrome c reductase complex 7.2 kDa protein (EC 1.10.2.2) (Cytochrome C1, nonheme 7 kDa)</i></b>    |                              |          |   |       |           |
| Q9UDW1                                                                                                                 | R.AFDQGADAIYDHINEGK.L        | 1867.859 | 2 | 0.847 | 3.456     |
| <b><i>Ubiquinol-cytochrome-c reductase complex core protein 2, mitochondrial precursor (EC 1.10.2.2) (Complex)</i></b> |                              |          |   |       |           |
| P22695                                                                                                                 | K.TIAQGNSNTDVQAAK.N          | 1630.839 | 2 | 0.706 | 0.645     |
| P22695                                                                                                                 | R.GGLGLSGAK.A                | 763.444  | 1 | 0.854 | 0.961     |
| P22695                                                                                                                 | K.TIAQGNSNTDVQAAK.N          | 1630.839 | 2 | 0.826 | 0.469     |
| P22695                                                                                                                 | K.TIAQGNSNTDVQAAK.N          | 1630.839 | 2 | 0.715 | 0.774     |
| <b><i>Ubiquinol-cytochrome-c reductase complex core protein 1, mitochondrial precursor (EC 1.10.2.2)</i></b>           |                              |          |   |       |           |
| P31930                                                                                                                 | R.IAEVDASVVR.E               | 1058.584 | 1 | 0.53  | 0.841     |
| P31930                                                                                                                 | R.NALVSHLDGTPVC*EDIGR.S      | 2053.997 | 2 | 0.827 | 0.97      |
| P31930                                                                                                                 | R.IAEVDASVVR.E               | 1058.584 | 2 | 0.935 | 0.242     |
| <b><i>UPF0198 protein CGI-141</i></b>                                                                                  |                              |          |   |       |           |
| Q9Y3E0                                                                                                                 | R.VPVLGSLNLPGIR.S            | 1447.9   | 2 | 0.622 | 0.939     |
| <b><i>Vacuolar ATP synthase subunit d (EC 3.6.3.14) (V-ATPase d subunit) (Vacuolar proton pump d subunit)</i></b>      |                              |          |   |       |           |
| P61421                                                                                                                 | R.LYPEGLAQLAR.A              | 1230.684 | 2 | 0.853 | 0.348     |
| <b><i>Vesicle trafficking protein SEC22b (SEC22 vesicle trafficking protein-like 1)</i></b>                            |                              |          |   |       |           |
| O75396                                                                                                                 | R.NLGSINTELQDVQR.I           | 1586.813 | 2 | 0.935 | 0.323     |
| O75396                                                                                                                 | K.LNEQSPTR.C                 | 944.48   | 1 | 0.449 | 0.685     |
| O75396                                                                                                                 | R.DLQYQSQAK.Q                | 1208.591 | 1 | 0.751 | 0.543     |
| O75396                                                                                                                 | R.DLQYQSQAK.Q                | 1208.591 | 2 | 0.708 | 0.709     |
| <b><i>Vesicle-associated membrane protein-associated protein A (VAMP-associated protein A) (VAMP-A) (VAP-A)</i></b>    |                              |          |   |       |           |
| Q9P0L0                                                                                                                 | K.FKGPFTDVVTNLK.L            | 1566.853 | 2 | 0.648 | 0.303     |
| Q9P0L0                                                                                                                 | K.PHSVSLNDTETR.K             | 1359.663 | 2 | 0.601 | 0.823     |
| <b><i>Voltage-dependent anion-selective channel protein 1 (VDAC-1) (hVDAC1) (Outer mitochondrial membrane)</i></b>     |                              |          |   |       |           |
| P21796                                                                                                                 | K.LTFDSSFSPNTGK.K            | 1400.669 | 2 | 0.331 | 1.288     |
| P21796                                                                                                                 | R.VTQSNFAVGYK.T              | 1213.621 | 1 | 0.78  | 0.541     |

| Acc No | Peptide                 | MH+      | z | f     | H/L ratio |
|--------|-------------------------|----------|---|-------|-----------|
| P21796 | K.LTFDSSFSPNTGK.K       | 1400.669 | 2 | 0.3   | 1.217     |
| P21796 | R.VTQSNFAVGYSK.T        | 1217.629 | 1 | 0.748 | 0.511     |
| P21796 | R.VTQSNFAVGYSK.T        | 1213.621 | 1 | 0.874 | 0.26      |
| P21796 | R.VTQSNFAVGYSK.T        | 1217.629 | 2 | 0.663 | 1.029     |
| P21796 | K.LTFDSSFSPNTGKK.N      | 1528.764 | 2 | 0.647 | 0.901     |
| P21796 | R.VTQSNFAVGYSK.T        | 1217.629 | 2 | 0.67  | 0.917     |
| P21796 | R.VTQSNFAVGYSK.T        | 1213.621 | 2 | 0.751 | 0.942     |
| P21796 | K.SENGLEFTSSGSANTETTK.V | 1959.878 | 2 | 0.362 | 3.418     |
| P21796 | K.LTFDSSFSPNTGK.K       | 1400.669 | 1 | 0.462 | 0.699     |
| P21796 | K.LTFDSSFSPNTGK.K       | 1400.669 | 1 | 0.454 | 1.098     |
| P21796 | K.LTFDSSFSPNTGK.K       | 1400.669 | 1 | 0.553 | 1.449     |
| P21796 | K.WNTDNTLGTEITVEDQLAR.G | 2176.052 | 2 | 0.393 | 1.097     |

***Voltage-dependent anion-selective channel protein 3 (VDAC-3) (hVDAC3) (Outer mitochondrial membrane)***

|        |                     |          |   |       |       |
|--------|---------------------|----------|---|-------|-------|
| Q9Y277 | K.LTLDTIFVPNTGK.K   | 1418.789 | 2 | 0.713 | 0.241 |
| Q9Y277 | K.VC*NYGLTFTQK.W    | 1330.646 | 2 | 0.696 | 0.204 |
| Q9Y277 | K.LTLDTIFVPNTGK.K   | 1418.789 | 2 | 0.551 | 0.549 |
| Q9Y277 | K.LSQNNFALGYK.A     | 1254.648 | 2 | 0.979 | 0.206 |
| Q9Y277 | K.VNNASLIGLGYTQLR.P | 1719.939 | 2 | 0.58  | 2.046 |
| Q9Y277 | K.LSQNNFALGYK.A     | 1254.648 | 2 | 0.802 | 0.141 |
| Q9Y277 | K.LTLDTIFVPNTGK.K   | 1418.789 | 2 | 0.402 | 0.582 |

***WD-repeat protein 67***

|        |                  |          |   |       |       |
|--------|------------------|----------|---|-------|-------|
| Q96DN5 | R.NKCYQEVAKLLR.E | 1464.799 | 2 | 0.939 | 0.073 |
|--------|------------------|----------|---|-------|-------|

***Zinc finger protein 512***

|        |                     |          |   |       |      |
|--------|---------------------|----------|---|-------|------|
| Q96ME7 | R.QQPGIELPETELSLR.V | 1709.907 | 2 | 0.725 | 0.44 |
|--------|---------------------|----------|---|-------|------|
