# Supplementary material
Source: PubMed Central journal article supplement (PMC3479679)
Supplement: NIHMS409433-supplement-Table_S2b.pdf [file NIHMS409433-supplement-Table_S2b.pdf]

**Supplemental Table S-2b. A list of 285 proteins quantified by present algorithm, sorted by protein name.**

| Acc No | Protein name                                                 | TPC | H/L(low) | H/L(high) | H/L(avg) |
|--------|--------------------------------------------------------------|-----|----------|-----------|----------|
| Q99460 | 26S proteasome non-ATPase regulatory subunit 1 (26S prot     | 2   | 0.708    | 1.195     | 0.92     |
| P62269 | 40S ribosomal protein S18 (Ke-3) (Ke3)                       | 2   | 0.49     | 0.571     | 0.529    |
| P08195 | 4F2 cell-surface antigen heavy chain (4F2hc) (Lymphocyte a   | 44  | 0.129    | 4.31      | 0.731    |
| Q07020 | 60S ribosomal protein L18                                    | 2   | 0.926    | 1.487     | 1.173    |
| Q02543 | 60S ribosomal protein L18a                                   | 1   | 0.362    | 0.362     | 0.362    |
| P62829 | 60S ribosomal protein L23 (Ribosomal protein L17)            | 1   | 1.105    | 1.105     | 1.105    |
| P62899 | 60S ribosomal protein L31                                    | 1   | 0.933    | 0.933     | 0.933    |
| P83881 | 60S ribosomal protein L36a (60S ribosomal protein L44) (Mig  | 1   | 1.149    | 1.149     | 1.149    |
| P36578 | 60S ribosomal protein L4 (L1)                                | 1   | 0.749    | 0.749     | 0.749    |
| O00400 | Acetyl-coenzyme A transporter 1 (AT-1) (Acetyl-CoA transpor  | 1   | 0.605    | 0.605     | 0.605    |
| Q8TB61 | Adenosine 3'-phospho 5'-phosphosulfate transporter 1 (PAP    | 3   | 0.482    | 1.76      | 0.785    |
| P12235 | ADP/ATP translocase 1 (Adenine nucleotide translocator 1) (  | 1   | 0.654    | 0.654     | 0.654    |
| P05141 | ADP/ATP translocase 2 (Adenine nucleotide translocator 2) (  | 6   | 0.286    | 1.105     | 0.462    |
| O00116 | Alkyldihydroxyacetonephosphate synthase, peroxisomal prec    | 1   | 1.174    | 1.174     | 1.174    |
| Q9H6U8 | Alpha-1,2-mannosyltransferase ALG9 (EC 2.4.1.-) (Asparagi    | 1   | 0.293    | 0.293     | 0.293    |
| Q15911 | Alpha-fetoprotein enhancer binding protein (AT motif-binding | 1   | 1.926    | 1.926     | 1.926    |
| Q9Y4J0 | Aspartyl(Asparaginy)l)beta-hydroxylase                       | 1   | 0.573    | 0.573     | 0.573    |
| P25705 | ATP synthase alpha chain, mitochondrial precursor (EC 3.6.3  | 11  | 0.385    | 1.906     | 0.78     |
| P06576 | ATP synthase beta chain, mitochondrial precursor (EC 3.6.3.  | 5   | 0.44     | 1.247     | 0.795    |
| P18859 | ATP synthase coupling factor 6, mitochondrial precursor (EC  | 1   | 0.912    | 0.912     | 0.912    |
| O75947 | ATP synthase D chain, mitochondrial (EC 3.6.3.14)            | 3   | 0.11     | 0.757     | 0.286    |
| P30049 | ATP synthase delta chain, mitochondrial precursor (EC 3.6.3. | 1   | 1.069    | 1.069     | 1.069    |
| O75964 | ATP synthase g chain, mitochondrial (EC 3.6.3.14) (ATPase    | 2   | 0.439    | 0.7       | 0.554    |
| P36542 | ATP synthase gamma chain, mitochondrial precursor (EC 3.     | 2   | 0.122    | 0.244     | 0.173    |
| P48047 | ATP synthase O subunit, mitochondrial precursor (EC 3.6.3.1  | 4   | 0.152    | 1.328     | 0.545    |
| Q8NBU5 | ATPase family AAA domain containing protein 1                | 1   | 0.107    | 0.107     | 0.107    |
| P33897 | ATP-binding cassette sub-family D member 1 (Adrenoleukod     | 3   | 0.311    | 0.707     | 0.475    |
| P28288 | ATP-binding cassette sub-family D member 3 (70 kDa peroxi    | 3   | 0.531    | 2.046     | 0.97     |

| Acc No | Protein name                                                    | TPC | H/L(low) | H/L(high) | H/L(avg) |
|--------|-----------------------------------------------------------------|-----|----------|-----------|----------|
| Q9UNQ0 | ATP-binding cassette sub-family G member 2 (Placenta-spec       | 8   | 0.129    | 1.396     | 0.506    |
| Q9NT62 | Autophagy protein 3-like (APG3-like) (hApp3) (PC3-96 protei     | 1   | 0.831    | 0.831     | 0.831    |
| O95816 | BAG family molecular chaperone regulator 2 (BCL2-associat       | 2   | 1.303    | 1.825     | 1.542    |
| Q9BXC9 | Bardet-Biedl syndrome 2 protein                                 | 1   | 0.173    | 0.173     | 0.173    |
| P35613 | Basigin precursor (CD147 antigen) (Leukocyte activation anti    | 3   | 0.506    | 1.001     | 0.661    |
| Q9C0K0 | B-cell lymphoma/leukemia 11B (B-cell CLL/lymphoma 11B) (        | 1   | 0.404    | 0.404     | 0.404    |
| Q9UHQ4 | B-cell receptor-associated protein 29 (BCR-associated protei    | 2   | 0.425    | 0.621     | 0.514    |
| P51572 | B-cell receptor-associated protein 31 (BCR-associated protei    | 5   | 0.361    | 1.583     | 0.838    |
| P61769 | Beta-2-microglobulin precursor [Contains: Beta-2-microglobul    | 1   | 0.845    | 0.845     | 0.845    |
| P80723 | Brain acid soluble protein 1 (BASP1 protein) (Neuronal axon     | 4   | 0.122    | 0.749     | 0.361    |
| Q9Y6D6 | Brefeldin A-inhibited guanine nucleotide-exchange protein 1 (   | 1   | 1.245    | 1.245     | 1.245    |
| Q15800 | C-4 methylsterol oxidase (EC 1.14.13.72) (Methylsterol mono     | 1   | 0.485    | 0.485     | 0.485    |
| O75844 | CAAX prenyl protease 1 homolog (EC 3.4.24.84) (Prenyl prot      | 2   | 0.654    | 0.81      | 0.728    |
| P98194 | Calcium-transporting ATPase type 2C member 1 (EC 3.6.3.8        | 1   | 1.027    | 1.027     | 1.027    |
| P27824 | Calnexin precursor (Major histocompatibility complex class I    | 1   | 0.509    | 0.509     | 0.509    |
| Q9GZY7 | CAMP/cGMP cyclic nucleotide phosphodiesterase 11A3              | 1   | 0.941    | 0.941     | 0.941    |
| P31327 | Carbamoyl-phosphate synthase [ammonia], mitochondrial pr        | 1   | 0.722    | 0.722     | 0.722    |
| P50416 | Carnitine O-palmitoyltransferase I, mitochondrial liver isoform | 1   | 0.495    | 0.495     | 0.495    |
| P13987 | CD59 glycoprotein precursor (Membrane attack complex inhi       | 1   | 1.979    | 1.979     | 1.979    |
| Q99459 | Cell division cycle 5-like protein (Cdc5-like protein) (Pombe c | 1   | 0.431    | 0.431     | 0.431    |
| Q15057 | Centaurin-beta 2 (Cnt-b2)                                       | 1   | 0.207    | 0.207     | 0.207    |
| O00590 | Chemokine-binding protein 2 (Chemokine-binding protein D6       | 1   | 2.239    | 2.239     | 2.239    |
| Q5TF85 | Chromosome 6 open reading frame 37                              | 1   | 5.137    | 5.137     | 5.137    |
| Q00610 | Clathrin heavy chain 1 (CLH-17)                                 | 2   | 1.088    | 2.652     | 1.699    |
| Q5W1L8 | CMP-sialic acid transporter                                     | 1   | 1.687    | 1.687     | 1.687    |
| Q9NX63 | Coiled-coil-helix-coiled-coil-helix domain containing protein 3 | 4   | 0.588    | 1.382     | 0.865    |
| Q02388 | Collagen alpha 1(VII) chain precursor (Long-chain collagen) (   | 1   | 0.465    | 0.465     | 0.465    |
| Q07021 | Complement component 1, Q subcomponent binding protein,         | 3   | 0.191    | 0.706     | 0.313    |
| Q9NS00 | Core1 UDP-galactose:N-acetylgalactosamine-alpha-R beta 1        | 1   | 0.236    | 0.236     | 0.236    |
| P20674 | Cytochrome c oxidase polypeptide Va, mitochondrial precurs      | 1   | 0.866    | 0.866     | 0.866    |
| P10606 | Cytochrome c oxidase polypeptide Vb, mitochondrial precurs      | 3   | 0.537    | 1.274     | 0.733    |

| Acc No | Protein name                                                     | TPC | H/L(low) | H/L(high) | H/L(avg) |
|--------|------------------------------------------------------------------|-----|----------|-----------|----------|
| P09669 | Cytochrome c oxidase polypeptide VIc precursor (EC 1.9.3.1)      | 3   | 0.574    | 0.716     | 0.659    |
| P14406 | Cytochrome c oxidase polypeptide VIIa-liver/heart, mitochon      | 2   | 0.715    | 1.636     | 1.082    |
| P13073 | Cytochrome c oxidase subunit IV isoform 1, mitochondrial pr      | 3   | 0.562    | 0.974     | 0.781    |
| O14548 | Cytochrome c oxidase subunit VIIa-related protein, mitochon      | 1   | 0.271    | 0.271     | 0.271    |
| P08574 | Cytochrome c1, heme protein, mitochondrial precursor (Cyto       | 3   | 0.159    | 0.959     | 0.494    |
| P53701 | Cytochrome c-type heme lyase (EC 4.4.1.17) (CCHL) (Holoc         | 1   | 0.511    | 0.511     | 0.511    |
| Q96P26 | Cytosolic 5'-nucleotidase 1B (EC 3.1.3.5) (Cytosolic 5'-nucleo   | 1   | 0.904    | 0.904     | 0.904    |
| P61803 | Defender against cell death 1 (DAD-1)                            | 1   | 0.164    | 0.164     | 0.164    |
| Q96HY7 | Dehydrogenase E1 and transketolase domain containing prot        | 1   | 1.612    | 1.612     | 1.612    |
| Q8NBQ5 | Dehydrogenase/reductase SDR family member 8 precursor (          | 2   | 0.276    | 0.687     | 0.435    |
| Q8TB45 | DEP domain containing 6                                          | 1   | 0.844    | 0.844     | 0.844    |
| P81605 | Dermcidin precursor (Preproteolysin) [Contains: Survival-pro     | 1   | 1.183    | 1.183     | 1.183    |
| P15924 | Desmoplakin (DP) (250/210 kDa paraneoplastic pemphigus           | 1   | 2.116    | 2.116     | 2.116    |
| P04053 | DNA nucleotidylexotransferase (EC 2.7.7.31) (Terminal additi     | 1   | 0.363    | 0.363     | 0.363    |
| Q5T219 | DnaJ (Hsp40) homolog, subfamily D, member 1 (Growth-inhi         | 1   | 0.676    | 0.676     | 0.676    |
| Q5VWA5 | Dolichyl-diphosphooligosaccharide-protein glycosyltransferas     | 5   | 0.471    | 1.745     | 0.771    |
| P04843 | Dolichyl-diphosphooligosaccharide--protein glycosyltransfera     | 23  | 0.18     | 2.554     | 0.534    |
| Q92685 | Dolichyl-P-Man:Man(5)GlcNAc(2)-PP-dolichyl mannosyltrans         | 2   | 0.68     | 1.521     | 1.017    |
| O75691 | Down-regulated in metastasis protein (Key-1A6 protein) (Nov      | 1   | 0.377    | 0.377     | 0.377    |
| Q6UXB4 | DTTR431 (C-type lectin superfamily 4, member G)                  | 1   | 48.218   | 48.218    | 48.218   |
| Q13409 | Dynein intermediate chain 2, cytosolic (DH IC-2) (Cytoplasmic    | 1   | 1.212    | 1.212     | 1.212    |
| P49411 | Elongation factor Tu, mitochondrial precursor (EF-Tu) (P43)      | 1   | 0.781    | 0.781     | 0.781    |
| Q9UHB6 | Epithelial protein lost in neoplasm                              | 1   | 1.025    | 1.025     | 1.025    |
| P27105 | Erythrocyte band 7 integral membrane protein (Stomatin) (Pr      | 1   | 0.647    | 0.647     | 0.647    |
| Q99613 | Eukaryotic translation initiation factor 3 subunit 8 (eIF3 p110) | 1   | 7.83     | 7.83      | 7.83     |
| Q01469 | Fatty acid-binding protein, epidermal (E-FABP) (Psoriasis-as     | 1   | 2.447    | 2.447     | 2.447    |
| Q9Y5Y0 | Feline leukemia virus subgroup C receptor-related protein 1 (    | 1   | 0.352    | 0.352     | 0.352    |
| Q9BYX7 | FKSG30                                                           | 1   | 181.065  | 181.065   | 181.065  |
| Q8TEP9 | FLJ00144 protein (Fragment)                                      | 1   | 0.105    | 0.105     | 0.105    |
| O75955 | Flotillin-1                                                      | 1   | 0.418    | 0.418     | 0.418    |
| Q14254 | Flotillin-2 (Epidermal surface antigen) (ESA)                    | 3   | 0.796    | 8.713     | 2.703    |

| <b>Acc No</b> | <b>Protein name</b>                                           | <b>TPC</b> | <b>H/L(low)</b> | <b>H/L(high)</b> | <b>H/L(avg)</b> |
|---------------|---------------------------------------------------------------|------------|-----------------|------------------|-----------------|
| Q71RG4        | FP2653 (ELSD1897) (MGC3123 protein)                           | 1          | 0.748           | 0.748            | 0.748           |
| Q6ZV73        | FYVE, RhoGEF and PH domain containing protein 6 (Zinc fin     | 1          | 1.949           | 1.949            | 1.949           |
| O95452        | Gap junction beta-6 protein (Connexin-30) (Cx30)              | 1          | 0.378           | 0.378            | 0.378           |
| Q6P1A2        | Gene rich cluster, C3f gene                                   | 1          | 0.555           | 0.555            | 0.555           |
| P48506        | Glutamate--cysteine ligase catalytic subunit (EC 6.3.2.2) (Ga | 1          | 0.786           | 0.786            | 0.786           |
| Q5JR58        | Glyceraldehyde 3-phosphate dehydrogenase (GAPDH)              | 1          | 0.322           | 0.322            | 0.322           |
| P04406        | Glyceraldehyde-3-phosphate dehydrogenase, liver (EC 1.2.1     | 1          | 2.726           | 2.726            | 2.726           |
| Q9UBI6        | Guanine nucleotide-binding protein G(l)/G(S)/G(O) gamma-1     | 1          | 0.169           | 0.169            | 0.169           |
| P08754        | Guanine nucleotide-binding protein G(k), alpha subunit (G(i)  | 1          | 1.08            | 1.08             | 1.08            |
| O95837        | Guanine nucleotide-binding protein, alpha-14 subunit (G-prot  | 1          | 0.292           | 0.292            | 0.292           |
| P11142        | Heat shock cognate 71 kDa protein (Heat shock 70 kDa prot     | 2          | 0.275           | 0.921            | 0.503           |
| P04792        | Heat-shock protein beta-1 (HspB1) (Heat shock 27 kDa prote    | 1          | 1.225           | 1.225            | 1.225           |
| P62805        | Histone H4                                                    | 11         | 0.208           | 1.305            | 0.782           |
| GAG_Prote     | HIV GAG protein                                               | 11         | 4.06            | 27.479           | 10.042          |
| Q8MH63        | HLAT1-3TM                                                     | 1          | 0.795           | 0.795            | 0.795           |
| P57058        | Hormonally up-regulated neu tumor-associated kinase (EC 2.    | 1          | 1.266           | 1.266            | 1.266           |
| Q9P035        | HSPC121                                                       | 3          | 0.475           | 0.93             | 0.6             |
| Q4G0N0        | Hypothetical protein                                          | 1          | 1.443           | 1.443            | 1.443           |
| Q6PQ33        | Hypothetical protein                                          | 1          | 1.18            | 1.18             | 1.18            |
| Q8Nfq8        | Hypothetical protein (Novel protein)                          | 1          | 0.894           | 0.894            | 0.894           |
| Q8N1H7        | Hypothetical protein C14orf39                                 | 1          | 1.165           | 1.165            | 1.165           |
| Q5H9S5        | Hypothetical protein DKFZp313B047                             | 1          | 0.202           | 0.202            | 0.202           |
| Q9NVA4        | Hypothetical protein FLJ10846                                 | 1          | 0.473           | 0.473            | 0.473           |
| Q96A33        | Hypothetical protein FLJ14938 (Hypothetical protein NT2RP2    | 1          | 0.557           | 0.557            | 0.557           |
| Q6ZN37        | Hypothetical protein FLJ16464                                 | 1          | 0.287           | 0.287            | 0.287           |
| Q9NX61        | Hypothetical protein FLJ20422 (AVLG582)                       | 1          | 1.635           | 1.635            | 1.635           |
| Q9NX40        | Hypothetical protein FLJ20455 (TPA018) (Ovarian carcinoma     | 1          | 0.293           | 0.293            | 0.293           |
| Q8N8I4        | Hypothetical protein FLJ39430                                 | 1          | 0.321           | 0.321            | 0.321           |
| Q6ZQW6        | Hypothetical protein FLJ46844                                 | 1          | 1.135           | 1.135            | 1.135           |
| Q71M32        | Hypothetical protein FP14381                                  | 1          | 0.453           | 0.453            | 0.453           |
| Q96RY5        | Hypothetical protein KIAA1426                                 | 1          | 0.373           | 0.373            | 0.373           |

| Acc No | Protein name                                                     | TPC | H/L(low) | H/L(high) | H/L(avg) |
|--------|------------------------------------------------------------------|-----|----------|-----------|----------|
| Q96BQ5 | Hypothetical protein LOC133957 (Hypothetical protein FLJ25       | 1   | 0.506    | 0.506     | 0.506    |
| Q9BQ15 | Hypothetical protein MGC2731                                     | 3   | 0.32     | 0.621     | 0.491    |
| Q96AG4 | Hypothetical protein PRO1855                                     | 1   | 0.649    | 0.649     | 0.649    |
| Q8TC63 | IGHG4 protein                                                    | 1   | 1.219    | 1.219     | 1.219    |
| Q15070 | Inner membrane protein OXA1L, mitochondrial precursor (Ox        | 1   | 0.987    | 0.987     | 0.987    |
| Q14571 | Inositol 1,4,5-trisphosphate receptor type 2 (Type 2 inositol 1, | 1   | 1.013    | 1.013     | 1.013    |
| Q8WYA0 | Intraflagellar transport 81 (Carnitine deficiency-associated pr  | 1   | 5.761    | 5.761     | 5.761    |
| Q6A163 | Ka35 protein                                                     | 1   | 1.109    | 1.109     | 1.109    |
| P05783 | Keratin, type I cytoskeletal 18 (Cytokeratin-18) (CK-18) (Kera   | 10  | 0.262    | 1.245     | 0.492    |
| P35527 | Keratin, type I cytoskeletal 9 (Cytokeratin-9) (CK-9) (Keratin-  | 19  | 0.5      | 8.506     | 2.043    |
| P04264 | Keratin, type II cytoskeletal 1 (Cytokeratin-1) (CK-1) (Keratin- | 41  | 0.634    | 4.62      | 1.88     |
| Q7Z794 | Keratin, type II cytoskeletal 1b                                 | 1   | 0.94     | 0.94      | 0.94     |
| P13647 | Keratin, type II cytoskeletal 5 (Cytokeratin-5) (CK-5) (Keratin- | 3   | 1.492    | 2.501     | 1.784    |
| P08729 | Keratin, type II cytoskeletal 7 (Cytokeratin-7) (CK-7) (Keratin- | 2   | 0.618    | 1.228     | 0.871    |
| P05787 | Keratin, type II cytoskeletal 8 (Cytokeratin-8) (CK-8) (Keraton  | 1   | 0.218    | 0.218     | 0.218    |
| Q6PG45 | Keratinocyte associated protein 2                                | 1   | 0.785    | 0.785     | 0.785    |
| P48449 | Lanosterol synthase (EC 5.4.99.7) (Oxidosqualene--lanoster       | 1   | 0.636    | 0.636     | 0.636    |
| Q01650 | Large neutral amino acids transporter small subunit 1 (L-type    | 1   | 0.283    | 0.283     | 0.283    |
| O95202 | Leucine zipper-EF-hand containing transmembrane protein 1        | 1   | 0.483    | 0.483     | 0.483    |
| Q14108 | Lysosome membrane protein II (LIMP II) (Scavenger recepto        | 1   | 0.205    | 0.205     | 0.205    |
| O95427 | Mcd4p homolog                                                    | 1   | 0.59     | 0.59      | 0.59     |
| O00264 | Membrane associated progesterone receptor component 1 (          | 2   | 0.204    | 0.602     | 0.35     |
| O15173 | Membrane associated progesterone receptor component 2 (          | 3   | 0.45     | 1.333     | 0.746    |
| Q9UM00 | Membrane protein (STMF151) (LOC54499) (Xenogeneic cro            | 2   | 0.39     | 0.761     | 0.545    |
| Q5BJH2 | MGC13159 protein                                                 | 1   | 0.89     | 0.89      | 0.89     |
| P10620 | Microsomal glutathione S-transferase 1 (EC 2.5.1.18) (Micro      | 2   | 0.837    | 1.127     | 0.971    |
| Q8TCT9 | Minor histocompatibility antigen H13 (EC 3.4.99.-) (Signal pe    | 2   | 0.454    | 0.531     | 0.491    |
| Q02978 | Mitochondrial 2-oxoglutarate/malate carrier protein (OGCP) (     | 1   | 0.287    | 0.287     | 0.287    |
| Q546F9 | Mitochondrial aspartate-glutamate carrier protein                | 2   | 0.524    | 0.643     | 0.58     |
| Q9Y6C9 | Mitochondrial carrier homolog 2 (Met-induced mitochondrial       | 6   | 0.161    | 0.413     | 0.273    |
| Q9UBX3 | Mitochondrial dicarboxylate carrier                              | 1   | 0.53     | 0.53      | 0.53     |

| Acc No | Protein name                                                  | TPC | H/L(low) | H/L(high) | H/L(avg) |
|--------|---------------------------------------------------------------|-----|----------|-----------|----------|
| O60830 | Mitochondrial import inner membrane translocase subunit Ti    | 1   | 1.14     | 1.14      | 1.14     |
| Q15388 | Mitochondrial import receptor subunit TOM20 homolog (Mito     | 1   | 0.524    | 0.524     | 0.524    |
| Q16891 | Mitochondrial inner membrane protein (Mitofilin) (p87/89) (Pr | 15  | 0.299    | 2.215     | 0.76     |
| Q9BVC6 | Mitsugumin-23 precursor (Mg23)                                | 1   | 0.71     | 0.71      | 0.71     |
| P53985 | Monocarboxylate transporter 1 (MCT 1)                         | 3   | 0.747    | 0.882     | 0.83     |
| O15427 | Monocarboxylate transporter 4 (MCT 4) (MCT 3)                 | 7   | 0.171    | 0.716     | 0.361    |
| Q8IZD4 | mRNA decapping enzyme 1B (EC 3.-.-.)                          | 1   | 0.312    | 0.312     | 0.312    |
| P10244 | Myb-related protein B (B-Myb)                                 | 1   | 0.403    | 0.403     | 0.403    |
| O43795 | Myosin Ib (Myosin I alpha) (MMI-alpha) (MMIa) (MYH-1c)        | 2   | 0.784    | 0.933     | 0.855    |
| Q4KMR3 | Myosin IE                                                     | 1   | 0.582    | 0.582     | 0.582    |
| P35580 | Myosin-10 (Myosin heavy chain, nonmuscle IIb) (Nonmuscle      | 2   | 1.13     | 1.147     | 1.138    |
| P35579 | Myosin-9 (Myosin heavy chain, nonmuscle IIa) (Nonmuscle       | 7   | 0.259    | 1.779     | 0.635    |
| Q13496 | Myotubularin (EC 3.1.3.48)                                    | 1   | 0.606    | 0.606     | 0.606    |
| Q76KP1 | N-acetylgalactosaminyltransferase                             | 1   | 0.228    | 0.228     | 0.228    |
| Q13423 | NAD(P) transhydrogenase, mitochondrial precursor (EC 1.6.     | 1   | 0.408    | 0.408     | 0.408    |
| Q9NXA8 | NAD-dependent deacetylase sirtuin-5 (EC 3.5.1.-) (SIR2-like   | 1   | 1.065    | 1.065     | 1.065    |
| P28331 | NADH-ubiquinone oxidoreductase 75 kDa subunit, mitochon       | 1   | 2.587    | 2.587     | 2.587    |
| O43676 | NADH-ubiquinone oxidoreductase B12 subunit (EC 1.6.5.3) (     | 1   | 0.259    | 0.259     | 0.259    |
| P03905 | NADH-ubiquinone oxidoreductase chain 4 (EC 1.6.5.3) (NAD      | 1   | 0.469    | 0.469     | 0.469    |
| P16435 | NADPH--cytochrome P450 reductase (EC 1.6.2.4) (CPR) (P4       | 11  | 0.114    | 2.038     | 0.625    |
| Q13765 | Nascent polypeptide-associated complex alpha subunit (NAC     | 1   | 0.976    | 0.976     | 0.976    |
| Q9HCC7 | NEDD4-like ubiquitin ligase 1                                 | 1   | 0.78     | 0.78      | 0.78     |
| Q14697 | Neutral alpha-glucosidase AB precursor (EC 3.2.1.84) (Glucos  | 1   | 1.208    | 1.208     | 1.208    |
| Q15758 | Neutral amino acid transporter B(0) (ATB(0)) (Sodium-depen    | 5   | 0.45     | 1.484     | 0.863    |
| Q9H2Q2 | NGT                                                           | 1   | 0.569    | 0.569     | 0.569    |
| Q5VZP5 | Novel protein                                                 | 1   | 0.675    | 0.675     | 0.675    |
| Q5JP08 | Novel protein                                                 | 1   | 0.261    | 0.261     | 0.261    |
| Q9NR30 | Nucleolar RNA helicase 2 (EC 3.6.1.-) (Nucleolar RNA helica   | 1   | 0.779    | 0.779     | 0.779    |
| Q8NI70 | OK/SW-CL.16                                                   | 1   | 0.371    | 0.371     | 0.371    |
| Q5JUJ7 | OTTHUMP00000017314 (Fragment)                                 | 1   | 0.932    | 0.932     | 0.932    |
| Q4VXA4 | OTTHUMP00000021035                                            | 1   | 0.435    | 0.435     | 0.435    |

| Acc No | Protein name                                                   | TPC | H/L(low) | H/L(high) | H/L(avg) |
|--------|----------------------------------------------------------------|-----|----------|-----------|----------|
| P23284 | Peptidyl-prolyl cis-trans isomerase B precursor (EC 5.2.1.8) ( | 1   | 0.753    | 0.753     | 0.753    |
| O95613 | Pericentrin (Pericentrin B) (Kendrin)                          | 1   | 0.997    | 0.997     | 0.997    |
| Q00325 | Phosphate carrier protein, mitochondrial precursor (PTP)       | 3   | 0.498    | 0.717     | 0.616    |
| O95674 | Phosphatidate cytidyltransferase 2 (EC 2.7.7.41) (CDP-digl     | 4   | 0.528    | 3.035     | 1.277    |
| Q9BVG9 | Phosphatidylserine synthase 2 (EC 2.7.8.-) (PtdSer synthase    | 3   | 0.456    | 0.982     | 0.696    |
| Q16526 | Photolyase (Cryptochrome 1)                                    | 2   | 0.233    | 0.306     | 0.267    |
| Q9H307 | Pinin (140 kDa nuclear and cell adhesion-related phosphopr     | 2   | 0.757    | 1.307     | 0.995    |
| Q9HB66 | PNAS-117                                                       | 2   | 0.338    | 0.524     | 0.421    |
| Q6NZI2 | Polymerase I and transcript release factor (PTRF protein)      | 1   | 0.55     | 0.55      | 0.55     |
| Q9NS91 | Postreplication repair protein RAD18 (hRAD18) (hHR18) (RI      | 1   | 0.178    | 0.178     | 0.178    |
| Q96CF8 | PRKR interacting protein 1 (IL11 inducible)                    | 1   | 1.006    | 1.006     | 1.006    |
| Q9HD20 | Probable cation-transporting ATPase 13A1 (EC 3.6.3.-)          | 3   | 0.549    | 0.774     | 0.646    |
| O94919 | Probable endonuclease KIAA0830 precursor (EC 3.1.30.-)         | 1   | 0.916    | 0.916     | 0.916    |
| O96008 | Probable mitochondrial import receptor subunit TOM40 homo      | 2   | 0.264    | 0.62      | 0.405    |
| Q8WUM4 | Programmed cell death 6-interacting protein (PDCD6-interact    | 1   | 0.558    | 0.558     | 0.558    |
| P35232 | Prohibitin                                                     | 9   | 0.252    | 1.36      | 0.431    |
| Q99623 | Prohibitin-2 (B-cell receptor-associated protein BAP37) (Repr  | 25  | 0.466    | 2.843     | 0.858    |
| Q9HCU5 | Prolactin regulatory element-binding protein (Mammalian gua    | 1   | 0.917    | 0.917     | 0.917    |
| O14684 | Prostaglandin E synthase (EC 5.3.99.3) (Microsomal glutathi    | 1   | 0.201    | 0.201     | 0.201    |
| Q6P0N0 | Protein C14orf106 (P243)                                       | 1   | 0.667    | 0.667     | 0.667    |
| Q8IVT2 | Protein C19orf21                                               | 1   | 0.717    | 0.717     | 0.717    |
| Q96CS3 | Protein expressed in T-cells and eosinophils in atopic dermat  | 1   | 0.229    | 0.229     | 0.229    |
| Q14165 | Protein KIAA0152 precursor                                     | 1   | 0.835    | 0.835     | 0.835    |
| Q9UPV7 | Protein KIAA1045                                               | 1   | 0.118    | 0.118     | 0.118    |
| P60468 | Protein transport protein Sec61 beta subunit                   | 5   | 0.257    | 0.461     | 0.353    |
| Q96QD8 | Putative 40-9-1 protein                                        | 1   | 0.734    | 0.734     | 0.734    |
| Q8IXJ9 | Putative Polycomb group protein ASXL1 (Additional sex com      | 1   | 0.202    | 0.202     | 0.202    |
| Q9Y4G8 | Rap guanine nucleotide exchange factor 2 (PDZ domain cont      | 1   | 0.333    | 0.333     | 0.333    |
| P46940 | Ras GTPase-activating-like protein IQGAP1 (p195)               | 1   | 0.435    | 0.435     | 0.435    |
| P61026 | Ras-related protein Rab-10                                     | 1   | 0.613    | 0.613     | 0.613    |
| P61106 | Ras-related protein Rab-14                                     | 1   | 0.454    | 0.454     | 0.454    |

| <b>Acc No</b> | <b>Protein name</b>                                            | <b>TPC</b> | <b>H/L(low)</b> | <b>H/L(high)</b> | <b>H/L(avg)</b> |
|---------------|----------------------------------------------------------------|------------|-----------------|------------------|-----------------|
| P61019        | Ras-related protein Rab-2A                                     | 3          | 0.677           | 1.238            | 0.833           |
| Q9BZG1        | Ras-related protein Rab-34 (Rab-39) (Ras-related protein Ra    | 1          | 0.527           | 0.527            | 0.527           |
| P51148        | Ras-related protein Rab-5C (RAB5L) (L1880)                     | 2          | 1.167           | 3.965            | 2.151           |
| P51149        | Ras-related protein Rab-7                                      | 10         | 0.401           | 3.944            | 1.131           |
| P51151        | Ras-related protein Rab-9A (Rab-9)                             | 1          | 0.237           | 0.237            | 0.237           |
| Q8NFJ5        | Retinoic acid-induced protein 3 (G-protein coupled receptor f  | 5          | 0.597           | 1.111            | 0.912           |
| Q15287        | RNA-binding protein with serine-rich domain 1 (SR-related pr   | 1          | 0.321           | 0.321            | 0.321           |
| Q49A11        | RPS27L protein                                                 | 1          | 0.42            | 0.42             | 0.42            |
| Q15413        | Ryanodine receptor 3 (Brain-type ryanodine receptor) (RyR3)    | 1          | 1.769           | 1.769            | 1.769           |
| P16615        | Sarcoplasmic/endoplasmic reticulum calcium ATPase 2 (EC        | 5          | 0.422           | 1.115            | 0.588           |
| Q8WTV0        | Scavenger receptor class B member 1 (SRB1) (SR-BI) (CD3        | 1          | 0.619           | 0.619            | 0.619           |
| O75880        | SCO1 protein homolog, mitochondrial precursor                  | 1          | 0.882           | 0.882            | 0.882           |
| Q4VX17        | Secretory carrier membrane protein 3                           | 1          | 0.406           | 0.406            | 0.406           |
| Q13501        | Sequestosome-1 (Phosphotyrosine-independent ligand for th      | 1          | 0.928           | 0.928            | 0.928           |
| Q52WX2        | SH3-binding kinase                                             | 1          | 0.441           | 0.441            | 0.441           |
| Q9H9B4        | Sideroflexin-1 (Tricarboxylate carrier protein) (TCC)          | 3          | 0.394           | 1.277            | 0.787           |
| Q15005        | Signal peptidase complex subunit 2 (EC 3.4.-.-) (Microsomal    | 4          | 0.096           | 0.662            | 0.361           |
| P61009        | Signal peptidase complex subunit 3 (EC 3.4.-.-) (Microsomal    | 1          | 1.428           | 1.428            | 1.428           |
| Q9Y5M8        | Signal recognition particle receptor beta subunit (SR-beta) (P | 2          | 0.239           | 0.61             | 0.382           |
| Q8N5K1        | Similar to mouse 1500009M05Rik protein                         | 1          | 0.5             | 0.5              | 0.5             |
| P05023        | Sodium/potassium-transporting ATPase alpha-1 chain precur      | 2          | 0.285           | 0.408            | 0.341           |
| P11166        | Solute carrier family 2, facilitated glucose transporter membe | 2          | 0.338           | 0.699            | 0.486           |
| Q6NUK1        | Solute carrier family 25 member 24, isoform 1                  | 1          | 0.07            | 0.07             | 0.07            |
| Q9Y512        | Sorting and assembly machinery component 50 homolog            | 7          | 0.313           | 1.234            | 0.571           |
| Q8TCJ2        | Source of immunodominant MHC-associated peptides               | 2          | 0.949           | 3.79             | 1.896           |
| Q13813        | Spectrin alpha chain, brain (Spectrin, non-erythroid alpha ch  | 14         | 0.068           | 1.745            | 0.552           |
| Q01082        | Spectrin beta chain, brain 1 (Spectrin, non-erythroid beta cha | 2          | 0.664           | 1.079            | 0.846           |
| O75477        | SPFH domain protein 1 precursor (Protein KE04)                 | 1          | 2.052           | 2.052            | 2.052           |
| O94905        | SPFH domain protein 2 precursor                                | 1          | 0.502           | 0.502            | 0.502           |
| Q9UHA8        | Splicing coactivator subunit SRm300                            | 3          | 0.368           | 0.823            | 0.596           |
| Q53GQ0        | Steroid dehydrogenase homolog (Fragment)                       | 1          | 0.361           | 0.361            | 0.361           |



| Acc No | Protein name                                                    | TPC | H/L(low) | H/L(high) | H/L(avg) |
|--------|-----------------------------------------------------------------|-----|----------|-----------|----------|
| O95425 | Supervillin (Archvillin) (p205/p250)                            | 1   | 0.6      | 0.6       | 0.6      |
| Q9NZ01 | Synaptic glycoprotein SC2                                       | 1   | 0.244    | 0.244     | 0.244    |
| Q15006 | Tetratricopeptide repeat protein KIAA0103                       | 2   | 0.876    | 1.144     | 1.001    |
| Q9H0W7 | THAP domain-containing protein 2                                | 2   | 0.456    | 0.516     | 0.485    |
| Q9H3N1 | Thioredoxin domain-containing protein 1 precursor (Transme      | 1   | 0.342    | 0.342     | 0.342    |
| Q6F5E7 | Thioredoxin reductase 2 intronic transcript 1                   | 1   | 0.447    | 0.447     | 0.447    |
| Q15643 | Thyroid receptor-interacting protein 11 (TRIP-11) (Golgi-asso   | 1   | 0.057    | 0.057     | 0.057    |
| O00463 | TNF receptor-associated factor 5 (RING finger protein 84)       | 1   | 1.03     | 1.03      | 1.03     |
| Q9UGU0 | Transcription factor 20 (Stromelysin 1 PDGF-responsive ele      | 1   | 2.5      | 2.5       | 2.5      |
| P02786 | Transferrin receptor protein 1 (TfR1) (TR) (TfR) (Tfr) (CD71    | 6   | 0.135    | 0.888     | 0.448    |
| Q9Y4A5 | Transformation/transcription domain-associated protein (350/    | 1   | 1.161    | 1.161     | 1.161    |
| Q9UGP8 | Translocation protein SEC63 homolog                             | 1   | 0.908    | 0.908     | 0.908    |
| P43307 | Translocon-associated protein alpha subunit precursor (TRA      | 1   | 0.64     | 0.64      | 0.64     |
| P51571 | Translocon-associated protein delta subunit precursor (TRAP     | 1   | 0.267    | 0.267     | 0.267    |
| Q9UNL2 | Translocon-associated protein gamma subunit (TRAP-gamm          | 2   | 0.26     | 0.484     | 0.355    |
| Q99805 | Transmembrane 9 superfamily protein member 2 precursor (        | 1   | 0.747    | 0.747     | 0.747    |
| P84157 | Transmembrane anchor protein 1                                  | 2   | 0.908    | 1.141     | 1.018    |
| P49755 | Transmembrane emp24 domain containing protein 10 precur         | 1   | 0.527    | 0.527     | 0.527    |
| Q7Z7H5 | Transmembrane emp24 domain containing protein 4 precurs         | 2   | 1.171    | 1.332     | 1.249    |
| Q9Y3A6 | Transmembrane emp24 domain containing protein 5 precurs         | 1   | 1.324    | 1.324     | 1.324    |
| Q9BVK6 | Transmembrane emp24 domain containing protein 9 precurs         | 1   | 1.372    | 1.372     | 1.372    |
| P17152 | Transmembrane protein 11 (Protein PM1)                          | 1   | 0.311    | 0.311     | 0.311    |
| P57088 | Transmembrane protein 33 (DB83 protein)                         | 4   | 0.395    | 0.806     | 0.53     |
| Q96GC9 | Transmembrane protein 49 (TDC1)                                 | 1   | 0.467    | 0.467     | 0.467    |
| Q9HC07 | Transmembrane protein PT27 (TPA regulated locus)                | 1   | 0.29     | 0.29      | 0.29     |
| P53007 | Tricarboxylate transport protein, mitochondrial precursor (Citr | 2   | 0.179    | 0.513     | 0.303    |
| P23510 | Tumor necrosis factor ligand superfamily member 4 (OX40 li      | 1   | 1.029    | 1.029     | 1.029    |
| Q561W0 | TXNDC14 protein                                                 | 1   | 0.979    | 0.979     | 0.979    |
| Q6RW13 | Type-1 angiotensin II receptor-associated protein (AT1 recep    | 1   | 1.019    | 1.019     | 1.019    |
| Q9UDW1 | Ubiquinol-cytochrome c reductase complex 7.2 kDa protein (      | 1   | 3.456    | 3.456     | 3.456    |
| P22695 | Ubiquinol-cytochrome-c reductase complex core protein 2, m      | 4   | 0.469    | 0.961     | 0.689    |

| <b>Acc No</b> | <b>Protein name</b>                                           | <b>TPC</b> | <b>H/L(low)</b> | <b>H/L(high)</b> | <b>H/L(avg)</b> |
|---------------|---------------------------------------------------------------|------------|-----------------|------------------|-----------------|
| P31930        | Ubiquinol-cytochrome-c reductase complex core protein I, mi   | 3          | 0.242           | 0.97             | 0.582           |
| Q9Y3E0        | UPF0198 protein CGI-141                                       | 1          | 0.939           | 0.939            | 0.939           |
| P61421        | Vacuolar ATP synthase subunit d (EC 3.6.3.14) (V-ATPase d     | 1          | 0.348           | 0.348            | 0.348           |
| O75396        | Vesicle trafficking protein SEC22b (SEC22 vesicle trafficking | 4          | 0.323           | 0.709            | 0.54            |
| Q9P0L0        | Vesicle-associated membrane protein-associated protein A (    | 2          | 0.303           | 0.823            | 0.499           |
| P21796        | Voltage-dependent anion-selective channel protein 1 (VDAC-    | 14         | 0.26            | 3.418            | 0.933           |
| Q9Y277        | Voltage-dependent anion-selective channel protein 3 (VDAC-    | 7          | 0.141           | 2.046            | 0.369           |
| Q96DN5        | WD-repeat protein 67                                          | 1          | 0.073           | 0.073            | 0.073           |
| Q96ME7        | Zinc finger protein 512                                       | 1          | 0.44            | 0.44             | 0.44            |
